# Supplementary material for: Basset: learning the regulatory code of the accessible genome with deep convolutional neural networks
Source: HighWire-hosted journal article supplement (doi:10.1101/gr.200535.115), 2016-05-03
Supplement: Supp_Basset-0.1.0.tar.gz [file jul2013.roadmapData.qc.xlsx]

## Sheet: Consolidated_EpigenomeIDs_summa
Comments	Epigenome ID (EID)	ORDER	GROUP	COLOR	Epigenome Mnemonic	Under Seq	Quality Rating	Auto Use Train (Core)	Manual Use Train (Core)	Has K27ac	Train Core + K27ac	Core + Ac + DNase + 9 Class1 Marks	Core + Ac + DNase + 13 Class1 Marks	Standardized Epigenome name	Epigenome name (from EDACC Release 9 directory)	ANATOMY	TYPE	LAB (Based on 5 core histone marks only)	AGE (Post Birth in YEARS/ Fetal in GESTATIONAL WEEKS/CELL LINE CL)	SEX (Male, Female, Mixed, Unknown)	SOLID / LIQUID	ETHNICITY	Single Donor (SD) /Composite (C)	DONOR / SAMPLE ALIAS	CLASS		Pool Filenames	Pool Filenames	Pool Filenames	Pool Filenames	Pool Filenames	Pool Filenames	Pool Filenames	Pool Filenames	Pool Filenames	Pool Filenames	Pool Filenames	Pool Filenames	Pool Filenames		Nreads (36bp) 30M	Nreads (36bp) 30M	Nreads (36bp) 30M	Nreads (36bp) 30M	Nreads (36bp) 30M	Nreads (36bp) 30M	Nreads (36bp) 30M	Nreads (36bp) 30M	Nreads (36bp) 50M
							Core Marks													33	64		43		(Check this)		Input	H3K9me3	H3K27me3	H3K4me3	H3K4me1	H3K36me3	H3K27ac	H3K9ac	DNase	RNA-seq	WGBS	RRBS	mCRF		Input	H3K9me3	H3K27me3	H3K4me3	H3K4me1	H3K36me3	H3K27ac	H3K9ac	DNase
								94	60	98	40	7	5							50	23		47				127	127	127	127	127	127	98	62	53	56	37	51	16		127	127	127	127	127	127	98	62	53
Outlier DNA methylation data due (older platform)	E017	1	IMR90	#E41A1C	LNG.IMR90	1	1	1	1	1	1	1	1	IMR90 fetal lung fibroblasts Cell Line	IMR90_Cell_Line	LUNG	CellLine	UCSD	CL	Female	NA	NA	SD	IMR90_r1;IMR90-04;IMR90-05;IMR90-06;IMR90-07	Class 1		UCSD.IMR90.Input.SK-I3.filt.tagAlign.gz;UCSD.IMR90.Input.IMR90-07-I1.filt.tagAlign.gz;UCSD.IMR90.Input.SK-I2.filt.tagAlign.gz;UCSD.IMR90.Input.IMR90-06-I1.filt.tagAlign.gz;UCSD.IMR90.Input.AK106.filt.tagAlign.gz;UCSD.IMR90.Input.SK-I1.filt.tagAlign.gz;UCSD.IMR90.Input.IMR90-05-I1.filt.tagAlign.gz;UCSD.IMR90.Input.LL-I2.filt.tagAlign.gz;UCSD.IMR90.Input.LL-I1.filt.tagAlign.gz	UCSD.IMR90.H3K9me3.SK06.filt.tagAlign.gz;UCSD.IMR90.H3K9me3.LL224.filt.tagAlign.gz;UCSD.IMR90.H3K9me3.YL104.filt.tagAlign.gz	UCSD.IMR90.H3K27me3.SK05.filt.tagAlign.gz;UCSD.IMR90.H3K27me3.LL223.filt.tagAlign.gz	UCSD.IMR90.H3K4me3.LL221.filt.tagAlign.gz;UCSD.IMR90.H3K4me3.SK03.filt.tagAlign.gz	UCSD.IMR90.H3K4me1.LL222.filt.tagAlign.gz;UCSD.IMR90.H3K4me1.SK04.filt.tagAlign.gz;UCSD.IMR90.H3K4me1.SYL133.filt.tagAlign.gz	UCSD.IMR90.H3K36me3.YL67.filt.tagAlign.gz;UCSD.IMR90.H3K36me3.LL225.filt.tagAlign.gz	UCSD.IMR90.H3K27ac.LL235.filt.tagAlign.gz;UCSD.IMR90.H3K27ac.LL231.filt.tagAlign.gz;UCSD.IMR90.H3K27ac.YL58.filt.tagAlign.gz	UCSD.IMR90.H3K9ac.LL233.filt.tagAlign.gz;UCSD.IMR90.H3K9ac.SK46.filt.tagAlign.gz	UW.IMR90.ChromatinAccessibility.DS13229.filt.tagAlign.gz;UW.IMR90.ChromatinAccessibility.DS11764.filt.tagAlign.gz;UW.IMR90.ChromatinAccessibility.DS13219.filt.tagAlign.gz;UW.IMR90.ChromatinAccessibility.DS11759.filt.tagAlign.gz		E017				30000000	30000000	30000000	28065544	30000000	30000000	30000000	23399369	50000000
	E002	2	ESC	#924965	ESC.WA7	-1	-1	0	0	0	0	0	0	ES-WA7 Cells	ES-WA7_Cell_Line	ESC	PrimaryCulture	BI	CL	Female	NA	NA	SD	58;35206;35207;35208;35210;36544	Class 4		BI.ES-WA7.Input.Lib_MC_20100211_05--ChIP_MC_20100208_05_WA07_WCE.filt.tagAlign.gz	BI.ES-WA7.H3K9me3.Solexa-12613.filt.tagAlign.gz	BI.ES-WA7.H3K27me3.Solexa-12609.filt.tagAlign.gz	BI.ES-WA7.H3K4me3.Solexa-13062.filt.tagAlign.gz	BI.ES-WA7.H3K4me1.Solexa-12611.filt.tagAlign.gz	BI.ES-WA7.H3K36me3.Solexa-12610.filt.tagAlign.gz		BI.ES-WA7.H3K9ac.Lib_MC_20100818_06--ChIP_MC_20100816_01_WA07_H3K9Ac.filt.tagAlign.gz				E002			10943655	7322985	13246745	6147367	10108554	9533889		29503477
	E008	3	ESC	#924965	ESC.H9	1	1	1	1	1	0	1	1	H9 Cells	H9_Cell_Line	ESC	PrimaryCulture	UCSD	CL	Female	NA	NA	SD	H9-01;H9-02;H9-04	Class 1		UCSD.H9.Input.SKH9-4.filt.tagAlign.gz;UCSD.H9.Input.AK144.filt.tagAlign.gz;UCSD.H9.Input.SK338.filt.tagAlign.gz	UCSD.H9.H3K9me3.SK100.filt.tagAlign.gz;UCSD.H9.H3K9me3.AK40.filt.tagAlign.gz;UCSD.H9.H3K9me3.SK200.filt.tagAlign.gz	UCSD.H9.H3K27me3.AK142.filt.tagAlign.gz;UCSD.H9.H3K27me3.SK99.filt.tagAlign.gz	UCSD.H9.H3K4me3.SK101.filt.tagAlign.gz;UCSD.H9.H3K4me3.AK39.filt.tagAlign.gz	UCSD.H9.H3K4me1.AK141.filt.tagAlign.gz;UCSD.H9.H3K4me1.YL123.filt.tagAlign.gz	UCSD.H9.H3K36me3.SK102.filt.tagAlign.gz;UCSD.H9.H3K36me3.SK278.filt.tagAlign.gz	UCSD.H9.H3K27ac.SK265.filt.tagAlign.gz;UCSD.H9.H3K27ac.YL237.filt.tagAlign.gz	UCSD.H9.H3K9ac.AK35.filt.tagAlign.gz;UCSD.H9.H3K9ac.SK199.filt.tagAlign.gz	UW.H9.ChromatinAccessibility.DS18522.filt.tagAlign.gz;UW.H9.ChromatinAccessibility.DS18517.filt.tagAlign.gz		E008	E008			30000000	30000000	30000000	23380403	30000000	22676195	30000000	30000000	50000000
Bad Methylation dataset. This epigenome is NOT to be used for DNA methylation analysis. All other data types are fine to use.	E001	4	ESC	#924965	ESC.I3	0	1	1	1	0	0	0	0	ES-I3 Cells	ES-I3_Cell_Line	ESC	PrimaryCulture	BI	CL	Female	NA	NA	SD	60;31436;35589;35592;35593;35594;40338;40339;40340;40585;40586;42133	Class 4		BI.ES-I3.Input.Lib_MC_20090522_07--ChIP_MC_20090519_07_hES_I3_TESR_WCE.filt.tagAlign.gz;BI.ES-I3.Input.Solexa-10219.filt.tagAlign.gz	BI.ES-I3.H3K9me3.Solexa-15475.filt.tagAlign.gz;BI.ES-I3.H3K9me3.Solexa-12683-16494.filt.tagAlign.gz	BI.ES-I3.H3K27me3.Solexa-10213-15380.filt.tagAlign.gz;BI.ES-I3.H3K27me3.Solexa-12678.filt.tagAlign.gz	BI.ES-I3.H3K4me3.Solexa-15474.filt.tagAlign.gz;BI.ES-I3.H3K4me3.Solexa-12681.filt.tagAlign.gz	BI.ES-I3.H3K4me1.Solexa-15382.filt.tagAlign.gz;BI.ES-I3.H3K4me1.Lib_MC_20100211_02--ChIP_MC_20100208_02_hES_I3_TESR_H3K4Me1.filt.tagAlign.gz	BI.ES-I3.H3K36me3.Solexa-15381.filt.tagAlign.gz;BI.ES-I3.H3K36me3.Solexa-16493.filt.tagAlign.gz		BI.ES-I3.H3K9ac.Solexa-12682.filt.tagAlign.gz;BI.ES-I3.H3K9ac.Solexa-15383.filt.tagAlign.gz							30000000	30000000	18992710	21464084	30000000	20540560		23124747
	E015	5	ESC	#924965	ESC.HUES6	1	1	1	1	1	0	0	0	HUES6 Cells	HUES6_Cell_Line	ESC	PrimaryCulture	BI	CL	Female	NA	NA	SD	199;207	Class 5		BI.HUES6.Input.Lib_XZ_20101004_14--ChIP_XZ_20100930_14_ES_cell_HUES_6_WCE.filt.tagAlign.gz;BI.HUES6.Input.Lib_XZ_20101004_07--ChIP_XZ_20100930_07_ES_cell_HUES_6_WCE.filt.tagAlign.gz	BI.HUES6.H3K9me3.Lib_XZ_20101004_06--ChIP_XZ_20100930_06_ES_cell_HUES_6_H3K9Me3.filt.tagAlign.gz;BI.HUES6.H3K9me3.Lib_XZ_20101004_13--ChIP_XZ_20100930_13_ES_cell_HUES_6_H3K9Me3.filt.tagAlign.gz	BI.HUES6.H3K27me3.Lib_XZ_20101004_04--ChIP_XZ_20100930_04_ES_cell_HUES_6_H3K27Me3.filt.tagAlign.gz;BI.HUES6.H3K27me3.Lib_XZ_20101004_11--ChIP_XZ_20100930_11_ES_cell_HUES_6_H3K27Me3.filt.tagAlign.gz	BI.HUES6.H3K4me3.Lib_XZ_20101004_09--ChIP_XZ_20100930_09_ES_cell_HUES_6_H3K4Me3.filt.tagAlign.gz;BI.HUES6.H3K4me3.Lib_XZ_20101004_02--ChIP_XZ_20100930_02_ES_cell_HUES_6_H3K4Me3.filt.tagAlign.gz	BI.HUES6.H3K4me1.Lib_XZ_20101004_01--ChIP_XZ_20100930_01_ES_cell_HUES_6_H3K4Me1.filt.tagAlign.gz;BI.HUES6.H3K4me1.Lib_XZ_20101004_08--ChIP_XZ_20100930_08_ES_cell_HUES_6_H3K4Me1.filt.tagAlign.gz	BI.HUES6.H3K36me3.Lib_XZ_20101004_03--ChIP_XZ_20100930_03_ES_cell_HUES_6_H3K36Me3.filt.tagAlign.gz;BI.HUES6.H3K36me3.Lib_XZ_20101004_10--ChIP_XZ_20100930_10_ES_cell_HUES_6_H3K36Me3.filt.tagAlign.gz	BI.HUES6.H3K27ac.DNA_Lib_835.filt.tagAlign.gz;BI.HUES6.H3K27ac.DNA_Lib_837.filt.tagAlign.gz	BI.HUES6.H3K9ac.Lib_XZ_20101004_12--ChIP_XZ_20100930_12_ES_cell_HUES_6_H3K9Ac.filt.tagAlign.gz				E015			30000000	30000000	30000000	30000000	30000000	30000000	30000000	23540772
	E014	6	ESC	#924965	ESC.HUES48	1	1	1	1	1	1	0	0	HUES48 Cells	HUES48_Cell_Line	ESC	PrimaryCulture	BI	CL	Female	NA	NA	SD	197;201;BioSam_824	Class 5		BI.HUES48.Input.Lib_EpiLabSPL_Row_1725.filt.tagAlign.gz;BI.HUES48.Input.Lib_EpiLabSPL_Row_1710.filt.tagAlign.gz	BI.HUES48.H3K9me3.Lib_EpiLabSPL_Row_1718.filt.tagAlign.gz;BI.HUES48.H3K9me3.Lib_EpiLabSPL_Row_1707.filt.tagAlign.gz	BI.HUES48.H3K27me3.Lib_EpiLabSPL_Row_1716.filt.tagAlign.gz;BI.HUES48.H3K27me3.Lib_MC_20101025_10--ChIP_MC_20101020_10_ES_cell_HUES_48_H3K27Me3.filt.tagAlign.gz	BI.HUES48.H3K4me3.Lib_MC_20101025_08--ChIP_MC_20101020_08_ES_cell_HUES_48_H3K4Me3.filt.tagAlign.gz;BI.HUES48.H3K4me3.Lib_EpiLabSPL_Row_1714.filt.tagAlign.gz	BI.HUES48.H3K4me1.Lib_EpiLabSPL_Row_1713.filt.tagAlign.gz;BI.HUES48.H3K4me1.Lib_MC_20101025_07--ChIP_MC_20101020_07_ES_cell_HUES_48_H3K4Me1.filt.tagAlign.gz	BI.HUES48.H3K36me3.Lib_MC_20101025_09--ChIP_MC_20101020_09_ES_cell_HUES_48_H3K36Me3.filt.tagAlign.gz;BI.HUES48.H3K36me3.Lib_EpiLabSPL_Row_1715.filt.tagAlign.gz	BI.HUES48.H3K27ac.DNA_Lib_2068.filt.tagAlign.gz	BI.HUES48.H3K9ac.Lib_EpiLabSPL_Row_1717.filt.tagAlign.gz;BI.HUES48.H3K9ac.Lib_MC_20101025_11--ChIP_MC_20101020_11_ES_cell_HUES_48_H3K9Ac.filt.tagAlign.gz				E014			30000000	30000000	30000000	30000000	30000000	30000000	18731798	30000000
	E016	7	ESC	#924965	ESC.HUES64	1	1	1	1	1	1	0	0	HUES64 Cells	HUES64_Cell_Line	ESC	PrimaryCulture	BI	CL	Male	NA	NA	SD	196;202;BioSam_825	Class 2		BI.HUES64.Input.Lib_EpiLabSPL_Row_1709.filt.tagAlign.gz;BI.HUES64.Input.Lib_EpiLabSPL_Row_1726.filt.tagAlign.gz	BI.HUES64.H3K9me3.Lib_EpiLabSPL_Row_1724.filt.tagAlign.gz;BI.HUES64.H3K9me3.Lib_MC_20101025_06--ChIP_MC_20101020_06_ES_cell_HUES_64_H3K9Me3.filt.tagAlign.gz	BI.HUES64.H3K27me3.Lib_MC_20101025_04--ChIP_MC_20101020_04_ES_cell_HUES_64_H3K27Me3.filt.tagAlign.gz;BI.HUES64.H3K27me3.Lib_EpiLabSPL_Row_1722.filt.tagAlign.gz	BI.HUES64.H3K4me3.Lib_MC_20101025_02--ChIP_MC_20101020_02_ES_cell_HUES_64_H3K4Me3.filt.tagAlign.gz;BI.HUES64.H3K4me3.Lib_EpiLabSPL_Row_1720.filt.tagAlign.gz	BI.HUES64.H3K4me1.Lib_MC_20101025_01--ChIP_MC_20101020_01_ES_cell_HUES_64_H3K4Me1.filt.tagAlign.gz;BI.HUES64.H3K4me1.Lib_EpiLabSPL_Row_1719.filt.tagAlign.gz	BI.HUES64.H3K36me3.Lib_MC_20101025_03--ChIP_MC_20101020_03_ES_cell_HUES_64_H3K36Me3.filt.tagAlign.gz;BI.HUES64.H3K36me3.Lib_EpiLabSPL_Row_1721.filt.tagAlign.gz	BI.HUES64.H3K27ac.DNA_Lib_834.filt.tagAlign.gz;BI.HUES64.H3K27ac.DNA_Lib_2069.filt.tagAlign.gz	BI.HUES64.H3K9ac.Lib_EpiLabSPL_Row_1723.filt.tagAlign.gz;BI.HUES64.H3K9ac.Lib_MC_20101025_05--ChIP_MC_20101020_05_ES_cell_HUES_64_H3K9Ac.filt.tagAlign.gz		BI.HUES64.mRNA-Seq.cDNA_Lib_18	E016				30000000	30000000	30000000	30000000	30000000	30000000	30000000	30000000
Outlier DNA methylation dataset (older platform)	E003	8	ESC	#924965	ESC.H1	1	1	1	1	1	1	1	1	H1 Cells	H1_Cell_Line	ESC	PrimaryCulture	BI;UCSD;UCSF-UBC	CL	Male	NA	NA	SD	56;68;69;27276;27277;35081;35082;35083;CDI-01;H1-07;H1-09;H1-10;H1-12;H1-13;hESC-01;HS0995;HS0998-1;HS1032-1;HS1345-1;HS1346-1;HS1347-1	Class 1		UCSD.H1.Input.YL328.filt.tagAlign.gz;UCSD.H1.Input.DM219.filt.tagAlign.gz;UCSD.H1.Input.LL-H1-I2.filt.tagAlign.gz;UCSF-UBC.H1.Input.TOTAL-hEScd2-2.filt.tagAlign.gz;UCSF-UBC.H1.Input.TOTAL-H1EScd1.filt.tagAlign.gz;BI.H1.Input.Solexa-10531.filt.tagAlign.gz;BI.H1.Input.Solexa-12532.filt.tagAlign.gz;UCSD.H1.Input.LLH1U.filt.tagAlign.gz;UCSD.H1.Input.LL-H1-I1.filt.tagAlign.gz;UCSD.H1.Input.AK57.filt.t…	UCSD.H1.H3K9me3.LL218.filt.tagAlign.gz;BI.H1.H3K9me3.Solexa-12525.filt.tagAlign.gz;UCSD.H1.H3K9me3.AK54.filt.tagAlign.gz;UCSD.H1.H3K9me3.YL75.filt.tagAlign.gz;UCSD.H1.H3K9me3.YL77.filt.tagAlign.gz;UCSF-UBC.H1.H3K9me3.H1EScd1-me3K9-A.filt.tagAlign.gz;UCSF-UBC.H1.H3K9me3.H1EScd2-me3K9-B.filt.tagAlign.gz	BI.H1.H3K27me3.Solexa-8039.filt.tagAlign.gz;UCSF-UBC.H1.H3K27me3.H1EScd1-me3K27-A.filt.tagAlign.gz;UCSD.H1.H3K27me3.LL314.filt.tagAlign.gz;UCSD.H1.H3K27me3.YL95.filt.tagAlign.gz;UCSD.H1.H3K27me3.LL241.filt.tagAlign.gz;BI.H1.H3K27me3.Solexa-12523.filt.tagAlign.gz	UCSF-UBC.H1.H3K4me3.H1EScd1-me3K4-A.filt.tagAlign.gz;UCSD.H1.H3K4me3.LL312.filt.tagAlign.gz;BI.H1.H3K4me3.Solexa-12522.filt.tagAlign.gz;UCSF-UBC.H1.H3K4me3.H1EScd2-me3K4-C.filt.tagAlign.gz;UCSD.H1.H3K4me3.SAK67.filt.tagAlign.gz;UCSD.H1.H3K4me3.LL227.filt.tagAlign.gz;BI.H1.H3K4me3.Solexa-8038.filt.tagAlign.gz;BI.H1.H3K4me3.Solexa-10398.filt.tagAlign.gz	BI.H1.H3K4me1.Solexa-10529.filt.tagAlign.gz;UCSF-UBC.H1.H3K4me1.H1EScd1-me1K4-D.filt.tagAlign.gz;UCSD.H1.H3K4me1.LL228.filt.tagAlign.gz;UCSD.H1.H3K4me1.LL311.filt.tagAlign.gz;UCSD.H1.H3K4me1.YL131.filt.tagAlign.gz;BI.H1.H3K4me1.Solexa-13061.filt.tagAlign.gz	UCSF-UBC.H1.H3K36me3.H1EScd2-me3K36-B.filt.tagAlign.gz;UCSD.H1.H3K36me3.SAK70.filt.tagAlign.gz;UCSF-UBC.H1.H3K36me3.H1EScd1-me3K36-A.filt.tagAlign.gz;UCSD.H1.H3K36me3.LL220.filt.tagAlign.gz;BI.H1.H3K36me3.Solexa-14961.filt.tagAlign.gz;BI.H1.H3K36me3.Solexa-12524.filt.tagAlign.gz;UCSD.H1.H3K36me3.LL160.filt.tagAlign.gz	UCSD.H1.H3K27ac.LL313.filt.tagAlign.gz;UCSD.H1.H3K27ac.SAK270.filt.tagAlign.gz	BI.H1.H3K9ac.Solexa-14962.filt.tagAlign.gz;UCSF-UBC.H1.H3K9ac.H1EScd1-acK9-A.filt.tagAlign.gz;UCSD.H1.H3K9ac.LL240.filt.tagAlign.gz;UCSD.H1.H3K9ac.SAK68.filt.tagAlign.gz;BI.H1.H3K9ac.Solexa-12526.filt.tagAlign.gz	UW.H1.ChromatinAccessibility.DS19100.filt.tagAlign.gz;UW.H1.ChromatinAccessibility.DS18873.filt.tagAlign.gz	E003	E003	E003	E003		30000000	30000000	30000000	30000000	30000000	30000000	21502554	30000000	50000000
	E024	9	ESC	#924965	ESC.4STAR	1	1	1	0	0	0	0	0	ES-UCSF4 Cells	4star	ESC	PrimaryCulture	UCSF-UBC	CL	Female	NA	NA	SD	UCSF-4*_Cell_Line_hESC	Class 2		UCSF-UBC.UCSF-4Star.Input.A19302.filt.tagAlign.gz	UCSF-UBC.UCSF-4Star.H3K9me3.A19298.filt.tagAlign.gz	UCSF-UBC.UCSF-4Star.H3K27me3.A19299.filt.tagAlign.gz	UCSF-UBC.UCSF-4Star.H3K4me3.A19297.filt.tagAlign.gz	UCSF-UBC.UCSF-4Star.H3K4me1.A19296.filt.tagAlign.gz	UCSF-UBC.UCSF-4Star.H3K36me3.A19300.filt.tagAlign.gz				E024	E024				30000000	23716344	28279639	30000000	30000000	30000000
	E020	10	iPSC	#69608A	IPSC.20B	1	0	1	1	1	0	0	0	iPS-20b Cells	iPS-20b_Cell_Line	IPSC	PrimaryCulture	BI	CL	Male	NA	NA	SD	66;67;BioSam_174	Class 4		BI.iPS-20b.Input.DNA_Lib_350.filt.tagAlign.gz;BI.iPS-20b.Input.DNA_Lib_440.filt.tagAlign.gz;BI.iPS-20b.Input.Solexa-10232.filt.tagAlign.gz;BI.iPS-20b.Input.Lib_MC_20100119_07--ChIP_MC_20100113_07_hiPS-20b_WCE.filt.tagAlign.gz	BI.iPS-20b.H3K9me3.Solexa-20765.filt.tagAlign.gz;BI.iPS-20b.H3K9me3.DNA_Lib_351.filt.tagAlign.gz	BI.iPS-20b.H3K27me3.DNA_Lib_356.filt.tagAlign.gz;BI.iPS-20b.H3K27me3.Lib_MC_20100119_06--ChIP_MC_20100113_06_hiPS-20b_H3K27Me3.filt.tagAlign.gz;BI.iPS-20b.H3K27me3.Solexa-15159.filt.tagAlign.gz	BI.iPS-20b.H3K4me3.DNA_Lib_353.filt.tagAlign.gz;BI.iPS-20b.H3K4me3.Lib_MC_20100119_05--ChIP_MC_20100113_05_hiPS-20b_H3K4Me3.filt.tagAlign.gz	BI.iPS-20b.H3K4me1.DNA_Lib_354.filt.tagAlign.gz;BI.iPS-20b.H3K4me1.Lib_MC_20100211_03--ChIP_MC_20100208_03_hiPS-20b_H3K4Me1.filt.tagAlign.gz	BI.iPS-20b.H3K36me3.DNA_Lib_355.filt.tagAlign.gz;BI.iPS-20b.H3K36me3.Solexa-20763.filt.tagAlign.gz	BI.iPS-20b.H3K27ac.DNA_Lib_357.filt.tagAlign.gz	BI.iPS-20b.H3K9ac.DNA_Lib_352.filt.tagAlign.gz;BI.iPS-20b.H3K9ac.Solexa-20764.filt.tagAlign.gz				E020			30000000	28347951	30000000	30000000	30000000	30000000	22466820	30000000
	E019	11	iPSC	#69608A	IPSC.18	1	0	1	1	1	0	0	0	iPS-18 Cells	iPS-18_Cell_Line	IPSC	PrimaryCulture	BI	CL	Female	NA	NA	SD	39791;46575;46576;46578;46579;46580;BioSam_173	Class 4		BI.iPS-18b.Input.Lib_MC_20090720_02--ChIP_MC_20090715_02_hiPS-18b_WCE.filt.tagAlign.gz;BI.iPS-18c.Input.Lib_MC_20100108_07--ChIP_MC_20100105_07_hiPS-18c_WCE.filt.tagAlign.gz;BI.iPS-18a.Input.DNA_Lib_342.filt.tagAlign.gz	BI.iPS-18c.H3K9me3.Solexa-19774.filt.tagAlign.gz;BI.iPS-18a.H3K9me3.DNA_Lib_343.filt.tagAlign.gz	BI.iPS-18a.H3K27me3.DNA_Lib_348.filt.tagAlign.gz;BI.iPS-18c.H3K27me3.Solexa-19791.filt.tagAlign.gz	BI.iPS-18a.H3K4me3.DNA_Lib_345.filt.tagAlign.gz;BI.iPS-18c.H3K4me3.Solexa-15173.filt.tagAlign.gz;BI.iPS-18c.H3K4me3.Solexa-19747.filt.tagAlign.gz	BI.iPS-18a.H3K4me1.DNA_Lib_346.filt.tagAlign.gz	BI.iPS-18a.H3K36me3.DNA_Lib_347.filt.tagAlign.gz;BI.iPS-18c.H3K36me3.Solexa-19808.filt.tagAlign.gz	BI.iPS-18a.H3K27ac.DNA_Lib_349.filt.tagAlign.gz	BI.iPS-18a.H3K9ac.DNA_Lib_344.filt.tagAlign.gz;BI.iPS-18c.H3K9ac.Solexa-19756.filt.tagAlign.gz				E019			30000000	27465155	30000000	30000000	30000000	30000000	30000000	27443132
	E018	12	iPSC	#69608A	IPSC.15b	-1	1	0	0	0	0	0	0	iPS-15b Cells	iPS-15b_Cell_Line	IPSC	PrimaryCulture	BI	CL	Female	NA	NA	SD	62	Class 5		BI.iPS-15b.Input.Solexa-15157.filt.tagAlign.gz;BI.iPS-15b.Input.Lib_MC_20100128_06--ChIP_MC_20100125_06_hiPS-15b_WCE.filt.tagAlign.gz	BI.iPS-15b.H3K9me3.Solexa-20732.filt.tagAlign.gz	BI.iPS-15b.H3K27me3.Lib_MC_20100128_05--ChIP_MC_20100125_05_hiPS-15b_H3K27Me3.filt.tagAlign.gz	BI.iPS-15b.H3K4me3.Solexa-20743.filt.tagAlign.gz	BI.iPS-15b.H3K4me1.Lib_MC_20100211_04--ChIP_MC_20100208_04_hiPS-15b_H3K4Me1.filt.tagAlign.gz	BI.iPS-15b.H3K36me3.Solexa-20749.filt.tagAlign.gz		BI.iPS-15b.H3K9ac.Solexa-20747.filt.tagAlign.gz				E018			30000000	15444243	25989220	21079889	28103845	13388393		19039321
	E021	13	iPSC	#69608A	IPSC.DF.6.9	1	1	1	1	1	0	0	0	iPS DF 6.9 Cells	iPS_DF_6.9_Cell_Line	IPSC	PrimaryCulture	UCSD	CL	Male	NA	NA	SD	iPS-6.9-01;iPS-6.9-02	Class 2		UCSD.iPS_DF_6.9.Input.SK445.filt.tagAlign.gz;UCSD.iPS_DF_6.9.Input.SKiPS6.9-1.filt.tagAlign.gz	UCSD.iPS_DF_6.9.H3K9me3.SK503.filt.tagAlign.gz;UCSD.iPS_DF_6.9.H3K9me3.SK274.filt.tagAlign.gz	UCSD.iPS_DF_6.9.H3K27me3.SK433.filt.tagAlign.gz;UCSD.iPS_DF_6.9.H3K27me3.SK275.filt.tagAlign.gz	UCSD.iPS_DF_6.9.H3K4me3.SK398.filt.tagAlign.gz;UCSD.iPS_DF_6.9.H3K4me3.SK471.filt.tagAlign.gz	UCSD.iPS_DF_6.9.H3K4me1.SK469.filt.tagAlign.gz;UCSD.iPS_DF_6.9.H3K4me1.SK397.filt.tagAlign.gz	UCSD.iPS_DF_6.9.H3K36me3.SK468.filt.tagAlign.gz;UCSD.iPS_DF_6.9.H3K36me3.SK400.filt.tagAlign.gz	UCSD.iPS_DF_6.9.H3K27ac.SK432.filt.tagAlign.gz		UW.iPS_DF_6.9.ChromatinAccessibility.DS15164.filt.tagAlign.gz		E021				30000000	30000000	30000000	30000000	30000000	30000000	27113934		26681306
	E022	14	iPSC	#69608A	IPSC.DF.19.11	0	1	1	0	1	0	0	0	iPS DF 19.11 Cells	iPS_DF_19.11_Cell_Line	IPSC	PrimaryCulture	UCSD	CL	Male	NA	NA	SD	iPS-19.11-01;iPS-19.11-02	Class 2		UCSD.iPS_DF_19.11.Input.SK446.filt.tagAlign.gz;UCSD.iPS_DF_19.11.Input.SKiPS19.11-1.filt.tagAlign.gz	UCSD.iPS_DF_19.11.H3K9me3.SK474.filt.tagAlign.gz;UCSD.iPS_DF_19.11.H3K9me3.SK232.filt.tagAlign.gz	UCSD.iPS_DF_19.11.H3K27me3.SK230.filt.tagAlign.gz;UCSD.iPS_DF_19.11.H3K27me3.SK435.filt.tagAlign.gz	UCSD.iPS_DF_19.11.H3K4me3.SK475.filt.tagAlign.gz;UCSD.iPS_DF_19.11.H3K4me3.SK227.filt.tagAlign.gz	UCSD.iPS_DF_19.11.H3K4me1.SK401.filt.tagAlign.gz;UCSD.iPS_DF_19.11.H3K4me1.SK473.filt.tagAlign.gz	UCSD.iPS_DF_19.11.H3K36me3.SK472.filt.tagAlign.gz	UCSD.iPS_DF_19.11.H3K27ac.SK402.filt.tagAlign.gz;UCSD.iPS_DF_19.11.H3K27ac.SK434.filt.tagAlign.gz;UCSD.iPS_DF_19.11.H3K27ac.SK395.filt.tagAlign.gz		UW.iPS_DF_19.11.ChromatinAccessibility.DS15153.filt.tagAlign.gz		E022				25608432	30000000	30000000	30000000	30000000	17605510	30000000		26661713
	E007	15	ES-deriv	#4178AE	ESDR.H1.NEUR.PROG	1	0	1	0	1	0	1	0	H1 Derived Neuronal Progenitor Cultured Cells	H1_Derived_Neuronal_Progenitor_Cultured_Cells	ESC_DERIVED	ESCDerived	UCSD	CL	Male	NA	NA	SD	NPC-03;NPC-04;NPC-05;NPC-06	Class 1		UCSD.H1_Derived_Neuronal_Progenitor_Cultured_Cells.Input.AK222.filt.tagAlign.gz;UCSD.H1_Derived_Neuronal_Progenitor_Cultured_Cells.Input.SK459.filt.tagAlign.gz;UCSD.H1_Derived_Neuronal_Progenitor_Cultured_Cells.Input.SK506.filt.tagAlign.gz;UCSD.H1_Derived_Neuronal_Progenitor_Cultured_Cells.Input.AK407.filt.tagAlign.gz	UCSD.H1_Derived_Neuronal_Progenitor_Cultured_Cells.H3K9me3.AK244.filt.tagAlign.gz;UCSD.H1_Derived_Neuronal_Progenitor_Cultured_Cells.H3K9me3.AK200.filt.tagAlign.gz;UCSD.H1_Derived_Neuronal_Progenitor_Cultured_Cells.H3K9me3.CY27.filt.tagAlign.gz	UCSD.H1_Derived_Neuronal_Progenitor_Cultured_Cells.H3K27me3.AK221.filt.tagAlign.gz;UCSD.H1_Derived_Neuronal_Progenitor_Cultured_Cells.H3K27me3.AK409.filt.tagAlign.gz;UCSD.H1_Derived_Neuronal_Progenitor_Cultured_Cells.H3K27me3.AK320.filt.tagAlign.gz	UCSD.H1_Derived_Neuronal_Progenitor_Cultured_Cells.H3K4me3.AK199.filt.tagAlign.gz;UCSD.H1_Derived_Neuronal_Progenitor_Cultured_Cells.H3K4me3.CY26.filt.tagAlign.gz;UCSD.H1_Derived_Neuronal_Progenitor_Cultured_Cells.H3K4me3.LH12.filt.tagAlign.gz;UCSD.H1_Derived_Neuronal_Progenitor_Cultured_Cells.H3K4me3.AK243.filt.tagAlign.gz	UCSD.H1_Derived_Neuronal_Progenitor_Cultured_Cells.H3K4me1.AK198.filt.tagAlign.gz;UCSD.H1_Derived_Neuronal_Progenitor_Cultured_Cells.H3K4me1.AK242.filt.tagAlign.gz;UCSD.H1_Derived_Neuronal_Progenitor_Cultured_Cells.H3K4me1.CY25.filt.tagAlign.gz	UCSD.H1_Derived_Neuronal_Progenitor_Cultured_Cells.H3K36me3.AK202.filt.tagAlign.gz;UCSD.H1_Derived_Neuronal_Progenitor_Cultured_Cells.H3K36me3.CY23.filt.tagAlign.gz;UCSD.H1_Derived_Neuronal_Progenitor_Cultured_Cells.H3K36me3.AK241.filt.tagAlign.gz	UCSD.H1_Derived_Neuronal_Progenitor_Cultured_Cells.H3K27ac.AK220.filt.tagAlign.gz;UCSD.H1_Derived_Neuronal_Progenitor_Cultured_Cells.H3K27ac.SK504.filt.tagAlign.gz;UCSD.H1_Derived_Neuronal_Progenitor_Cultured_Cells.H3K27ac.AK319.filt.tagAlign.gz;UCSD.H1_Derived_Neuronal_Progenitor_Cultured_Cells.H3K27ac.SK451.filt.tagAlign.gz;UCSD.H1_Derived_Neuronal_Progenitor_Cultured_Cells.H3K27ac.AK408.filt.t…	UCSD.H1_Derived_Neuronal_Progenitor_Cultured_Cells.H3K9ac.AK263.filt.tagAlign.gz	UW.H1_Derived_Neuronal_Progenitor_Cultured_Cells.ChromatinAccessibility.DS20153.filt.tagAlign.gz;UW.H1_Derived_Neuronal_Progenitor_Cultured_Cells.ChromatinAccessibility.DS18739.filt.tagAlign.gz	E007	E007				30000000	30000000	30000000	30000000	30000000	30000000	30000000	30000000	50000000
	E009	16	ES-deriv	#4178AE	ESDR.H9.NEUR.PROG	1	1	1	1	0	0	0	0	H9 Derived Neuronal Progenitor Cultured Cells	H9_Derived_Neuronal_Progenitor_Cultured_Cells	ESC_DERIVED	ESCDerived	BI	CL	Female	NA	NA	SD	113	Class 5		BI.H9_Derived_Neuronal_Progenitor_Cultured_Cells.Input.113.filt.tagAlign.gz	BI.H9_Derived_Neuronal_Progenitor_Cultured_Cells.H3K9me3.113.filt.tagAlign.gz	BI.H9_Derived_Neuronal_Progenitor_Cultured_Cells.H3K27me3.113.filt.tagAlign.gz	BI.H9_Derived_Neuronal_Progenitor_Cultured_Cells.H3K4me3.113.filt.tagAlign.gz	BI.H9_Derived_Neuronal_Progenitor_Cultured_Cells.H3K4me1.113.filt.tagAlign.gz	BI.H9_Derived_Neuronal_Progenitor_Cultured_Cells.H3K36me3.113.filt.tagAlign.gz						E009			30000000	30000000	30000000	30000000	28071907	30000000
	E010	17	ES-deriv	#4178AE	ESDR.H9.NEUR	1	1	1	1	0	0	0	0	H9 Derived Neuron Cultured Cells	H9_Derived_Neuron_Cultured_Cells	ESC_DERIVED	ESCDerived	BI	CL	Female	NA	NA	SD	113	Class 5		BI.H9_Derived_Neuron_Cultured_Cells.Input.113.filt.tagAlign.gz	BI.H9_Derived_Neuron_Cultured_Cells.H3K9me3.113.filt.tagAlign.gz	BI.H9_Derived_Neuron_Cultured_Cells.H3K27me3.113.filt.tagAlign.gz	BI.H9_Derived_Neuron_Cultured_Cells.H3K4me3.113.filt.tagAlign.gz	BI.H9_Derived_Neuron_Cultured_Cells.H3K4me1.113.filt.tagAlign.gz	BI.H9_Derived_Neuron_Cultured_Cells.H3K36me3.113.filt.tagAlign.gz						E010			30000000	30000000	29590040	30000000	30000000	30000000
	E013	18	ES-deriv	#4178AE	ESDR.CD56.MESO	-1	-1	0	0	1	0	0	0	hESC Derived CD56+ Mesoderm Cultured Cells	hESC_Derived_CD56+_Mesoderm_Cultured_Cells	ESC_DERIVED	ESCDerived	BI	CL	Male	NA	NA	SD	BioSam_1249;BioSam_1250;BioSam_575;BioSam_577	Class 2		BI.hESC_Derived_CD56+_Mesoderm_Cultured_Cells.Input.DNA_Lib_1317.filt.tagAlign.gz;BI.hESC_Derived_CD56+_Mesoderm_Cultured_Cells.Input.DNA_Lib_1318.filt.tagAlign.gz	BI.hESC_Derived_CD56+_Mesoderm_Cultured_Cells.H3K9me3.DNA_Lib_3197.filt.tagAlign.gz;BI.hESC_Derived_CD56+_Mesoderm_Cultured_Cells.H3K9me3.DNA_Lib_1276.filt.tagAlign.gz;BI.hESC_Derived_CD56+_Mesoderm_Cultured_Cells.H3K9me3.DNA_Lib_1282.filt.tagAlign.gz	BI.hESC_Derived_CD56+_Mesoderm_Cultured_Cells.H3K27me3.DNA_Lib_1274.filt.tagAlign.gz	BI.hESC_Derived_CD56+_Mesoderm_Cultured_Cells.H3K4me3.DNA_Lib_1273.filt.tagAlign.gz;BI.hESC_Derived_CD56+_Mesoderm_Cultured_Cells.H3K4me3.DNA_Lib_1279.filt.tagAlign.gz	BI.hESC_Derived_CD56+_Mesoderm_Cultured_Cells.H3K4me1.DNA_Lib_1272.filt.tagAlign.gz	BI.hESC_Derived_CD56+_Mesoderm_Cultured_Cells.H3K36me3.DNA_Lib_1277.filt.tagAlign.gz;BI.hESC_Derived_CD56+_Mesoderm_Cultured_Cells.H3K36me3.DNA_Lib_1283.filt.tagAlign.gz	BI.hESC_Derived_CD56+_Mesoderm_Cultured_Cells.H3K27ac.DNA_Lib_3198.filt.tagAlign.gz;BI.hESC_Derived_CD56+_Mesoderm_Cultured_Cells.H3K27ac.DNA_Lib_3195.filt.tagAlign.gz			E013	E013				30000000	30000000	4322464	10585491	11179426	21204689	30000000
	E012	19	ES-deriv	#4178AE	ESDR.CD56.ECTO	-1	0	0	0	1	0	0	0	hESC Derived CD56+ Ectoderm Cultured Cells	hESC_Derived_CD56+_Ectoderm_Cultured_Cells	ESC_DERIVED	ESCDerived	BI	CL	Male	NA	NA	SD	BioSam_1247;BioSam_1248;BioSam_707	Class 2		BI.hESC_Derived_CD56+_Ectoderm_Cultured_Cells.Input.DNA_Lib_1812.filt.tagAlign.gz;BI.hESC_Derived_CD56+_Ectoderm_Cultured_Cells.Input.DNA_Lib_2066.filt.tagAlign.gz	BI.hESC_Derived_CD56+_Ectoderm_Cultured_Cells.H3K9me3.DNA_Lib_1811.filt.tagAlign.gz;BI.hESC_Derived_CD56+_Ectoderm_Cultured_Cells.H3K9me3.DNA_Lib_3192.filt.tagAlign.gz	BI.hESC_Derived_CD56+_Ectoderm_Cultured_Cells.H3K27me3.DNA_Lib_3193.filt.tagAlign.gz;BI.hESC_Derived_CD56+_Ectoderm_Cultured_Cells.H3K27me3.DNA_Lib_1807.filt.tagAlign.gz	BI.hESC_Derived_CD56+_Ectoderm_Cultured_Cells.H3K4me3.DNA_Lib_1810.filt.tagAlign.gz;BI.hESC_Derived_CD56+_Ectoderm_Cultured_Cells.H3K4me3.DNA_Lib_2073.filt.tagAlign.gz	BI.hESC_Derived_CD56+_Ectoderm_Cultured_Cells.H3K4me1.DNA_Lib_1809.filt.tagAlign.gz	BI.hESC_Derived_CD56+_Ectoderm_Cultured_Cells.H3K36me3.DNA_Lib_1808.filt.tagAlign.gz	BI.hESC_Derived_CD56+_Ectoderm_Cultured_Cells.H3K27ac.DNA_Lib_3191.filt.tagAlign.gz;BI.hESC_Derived_CD56+_Ectoderm_Cultured_Cells.H3K27ac.DNA_Lib_3194.filt.tagAlign.gz			E012	E012				30000000	18478765	18532506	17283261	13876103	14361584	17645625
	E011	20	ES-deriv	#4178AE	ESDR.CD184.ENDO	1	0	1	1	1	1	0	0	hESC Derived CD184+ Endoderm Cultured Cells	hESC_Derived_CD184+_Endoderm_Cultured_Cells	ESC_DERIVED	ESCDerived	BI	CL	Male	NA	NA	SD	262;263	Class 2		BI.hESC_Derived_CD184+_Endoderm_Cultured_Cells.Input.DNA_Lib_244.filt.tagAlign.gz;BI.hESC_Derived_CD184+_Endoderm_Cultured_Cells.Input.DNA_Lib_264.filt.tagAlign.gz	BI.hESC_Derived_CD184+_Endoderm_Cultured_Cells.H3K9me3.DNA_Lib_242.filt.tagAlign.gz;BI.hESC_Derived_CD184+_Endoderm_Cultured_Cells.H3K9me3.DNA_Lib_248.filt.tagAlign.gz	BI.hESC_Derived_CD184+_Endoderm_Cultured_Cells.H3K27me3.DNA_Lib_239.filt.tagAlign.gz;BI.hESC_Derived_CD184+_Endoderm_Cultured_Cells.H3K27me3.DNA_Lib_246.filt.tagAlign.gz	BI.hESC_Derived_CD184+_Endoderm_Cultured_Cells.H3K4me3.DNA_Lib_241.filt.tagAlign.gz;BI.hESC_Derived_CD184+_Endoderm_Cultured_Cells.H3K4me3.DNA_Lib_247.filt.tagAlign.gz	BI.hESC_Derived_CD184+_Endoderm_Cultured_Cells.H3K4me1.DNA_Lib_3190.filt.tagAlign.gz;BI.hESC_Derived_CD184+_Endoderm_Cultured_Cells.H3K4me1.DNA_Lib_249.filt.tagAlign.gz;BI.hESC_Derived_CD184+_Endoderm_Cultured_Cells.H3K4me1.DNA_Lib_2067.filt.tagAlign.gz	BI.hESC_Derived_CD184+_Endoderm_Cultured_Cells.H3K36me3.DNA_Lib_263.filt.tagAlign.gz;BI.hESC_Derived_CD184+_Endoderm_Cultured_Cells.H3K36me3.DNA_Lib_842.filt.tagAlign.gz	BI.hESC_Derived_CD184+_Endoderm_Cultured_Cells.H3K27ac.DNA_Lib_3188.filt.tagAlign.gz;BI.hESC_Derived_CD184+_Endoderm_Cultured_Cells.H3K27ac.DNA_Lib_3189.filt.tagAlign.gz	BI.hESC_Derived_CD184+_Endoderm_Cultured_Cells.H3K9ac.DNA_Lib_238.filt.tagAlign.gz;BI.hESC_Derived_CD184+_Endoderm_Cultured_Cells.H3K9ac.DNA_Lib_245.filt.tagAlign.gz		E011	E011	E011			30000000	30000000	30000000	30000000	30000000	30000000	30000000	30000000
	E004	21	ES-deriv	#4178AE	ESDR.H1.BMP4.MESO	1	0	1	0	1	0	1	0	H1 BMP4 Derived Mesendoderm Cultured Cells	H1_BMP4_Derived_Mesendoderm_Cultured_Cells	ESC_DERIVED	ESCDerived	UCSD	CL	Male	NA	NA	SD	BMP4-03;BMP4-04;BMP4-07;BMP4-08	Class 1		UCSD.H1_BMP4_Derived_Mesendoderm_Cultured_Cells.Input.AK318.filt.tagAlign.gz;UCSD.H1_BMP4_Derived_Mesendoderm_Cultured_Cells.Input.SK344.filt.tagAlign.gz;UCSD.H1_BMP4_Derived_Mesendoderm_Cultured_Cells.Input.AK312.filt.tagAlign.gz;UCSD.H1_BMP4_Derived_Mesendoderm_Cultured_Cells.Input.AK149.filt.tagAlign.gz	UCSD.H1_BMP4_Derived_Mesendoderm_Cultured_Cells.H3K9me3.SK526.filt.tagAlign.gz;UCSD.H1_BMP4_Derived_Mesendoderm_Cultured_Cells.H3K9me3.AK136.filt.tagAlign.gz	UCSD.H1_BMP4_Derived_Mesendoderm_Cultured_Cells.H3K27me3.AK311.filt.tagAlign.gz;UCSD.H1_BMP4_Derived_Mesendoderm_Cultured_Cells.H3K27me3.AK314.filt.tagAlign.gz;UCSD.H1_BMP4_Derived_Mesendoderm_Cultured_Cells.H3K27me3.AK132.filt.tagAlign.gz;UCSD.H1_BMP4_Derived_Mesendoderm_Cultured_Cells.H3K27me3.AK148.filt.tagAlign.gz	UCSD.H1_BMP4_Derived_Mesendoderm_Cultured_Cells.H3K4me3.AK135.filt.tagAlign.gz;UCSD.H1_BMP4_Derived_Mesendoderm_Cultured_Cells.H3K4me3.AK165.filt.tagAlign.gz	UCSD.H1_BMP4_Derived_Mesendoderm_Cultured_Cells.H3K4me1.AK163.filt.tagAlign.gz;UCSD.H1_BMP4_Derived_Mesendoderm_Cultured_Cells.H3K4me1.AK133.filt.tagAlign.gz	UCSD.H1_BMP4_Derived_Mesendoderm_Cultured_Cells.H3K36me3.AK137.filt.tagAlign.gz	UCSD.H1_BMP4_Derived_Mesendoderm_Cultured_Cells.H3K27ac.AK313.filt.tagAlign.gz;UCSD.H1_BMP4_Derived_Mesendoderm_Cultured_Cells.H3K27ac.SK340.filt.tagAlign.gz;UCSD.H1_BMP4_Derived_Mesendoderm_Cultured_Cells.H3K27ac.AK310.filt.tagAlign.gz;UCSD.H1_BMP4_Derived_Mesendoderm_Cultured_Cells.H3K27ac.AK147.filt.tagAlign.gz	UCSD.H1_BMP4_Derived_Mesendoderm_Cultured_Cells.H3K9ac.AK128.filt.tagAlign.gz;UCSD.H1_BMP4_Derived_Mesendoderm_Cultured_Cells.H3K9ac.AK172.filt.tagAlign.gz	UW.H1_BMP4_Derived_Mesendoderm_Cultured_Cells.ChromatinAccessibility.DS19310.filt.tagAlign.gz;UW.H1_BMP4_Derived_Mesendoderm_Cultured_Cells.ChromatinAccessibility.DS18732.filt.tagAlign.gz	E004	E004				30000000	30000000	30000000	30000000	30000000	30000000	30000000	30000000	50000000
	E005	22	ES-deriv	#4178AE	ESDR.H1.BMP4.TROP	1	1	1	1	1	1	1	1	H1 BMP4 Derived Trophoblast Cultured Cells	H1_BMP4_Derived_Trophoblast_Cultured_Cells	ESC_DERIVED	ESCDerived	UCSD	CL	Male	NA	NA	SD	BMP4-05;BMP4-06;BMP4-09	Class 1		UCSD.H1_BMP4_Derived_Trophoblast_Cultured_Cells.Input.SK458.filt.tagAlign.gz;UCSD.H1_BMP4_Derived_Trophoblast_Cultured_Cells.Input.AK315.filt.tagAlign.gz;UCSD.H1_BMP4_Derived_Trophoblast_Cultured_Cells.Input.SK457.filt.tagAlign.gz	UCSD.H1_BMP4_Derived_Trophoblast_Cultured_Cells.H3K9me3.LH8.filt.tagAlign.gz;UCSD.H1_BMP4_Derived_Trophoblast_Cultured_Cells.H3K9me3.AY66.filt.tagAlign.gz;UCSD.H1_BMP4_Derived_Trophoblast_Cultured_Cells.H3K9me3.LH4.filt.tagAlign.gz	UCSD.H1_BMP4_Derived_Trophoblast_Cultured_Cells.H3K27me3.AK317.filt.tagAlign.gz;UCSD.H1_BMP4_Derived_Trophoblast_Cultured_Cells.H3K27me3.SK448.filt.tagAlign.gz;UCSD.H1_BMP4_Derived_Trophoblast_Cultured_Cells.H3K27me3.SK450.filt.tagAlign.gz	UCSD.H1_BMP4_Derived_Trophoblast_Cultured_Cells.H3K4me3.LH6.filt.tagAlign.gz;UCSD.H1_BMP4_Derived_Trophoblast_Cultured_Cells.H3K4me3.LH2.filt.tagAlign.gz;UCSD.H1_BMP4_Derived_Trophoblast_Cultured_Cells.H3K4me3.AY65.filt.tagAlign.gz	UCSD.H1_BMP4_Derived_Trophoblast_Cultured_Cells.H3K4me1.LH5.filt.tagAlign.gz;UCSD.H1_BMP4_Derived_Trophoblast_Cultured_Cells.H3K4me1.LH1.filt.tagAlign.gz;UCSD.H1_BMP4_Derived_Trophoblast_Cultured_Cells.H3K4me1.AY258.filt.tagAlign.gz;UCSD.H1_BMP4_Derived_Trophoblast_Cultured_Cells.H3K4me1.AY64.filt.tagAlign.gz	UCSD.H1_BMP4_Derived_Trophoblast_Cultured_Cells.H3K36me3.AY259.filt.tagAlign.gz;UCSD.H1_BMP4_Derived_Trophoblast_Cultured_Cells.H3K36me3.AY67.filt.tagAlign.gz;UCSD.H1_BMP4_Derived_Trophoblast_Cultured_Cells.H3K36me3.LH7.filt.tagAlign.gz;UCSD.H1_BMP4_Derived_Trophoblast_Cultured_Cells.H3K36me3.LH3.filt.tagAlign.gz	UCSD.H1_BMP4_Derived_Trophoblast_Cultured_Cells.H3K27ac.SK447.filt.tagAlign.gz;UCSD.H1_BMP4_Derived_Trophoblast_Cultured_Cells.H3K27ac.SK449.filt.tagAlign.gz;UCSD.H1_BMP4_Derived_Trophoblast_Cultured_Cells.H3K27ac.AK316.filt.tagAlign.gz	UCSD.H1_BMP4_Derived_Trophoblast_Cultured_Cells.H3K9ac.SK496.filt.tagAlign.gz;UCSD.H1_BMP4_Derived_Trophoblast_Cultured_Cells.H3K9ac.SK495.filt.tagAlign.gz	UW.H1_BMP4_Derived_Trophoblast_Cultured_Cells.ChromatinAccessibility.DS19317.filt.tagAlign.gz;UW.H1_BMP4_Derived_Trophoblast_Cultured_Cells.ChromatinAccessibility.DS18736.filt.tagAlign.gz	E005	E005				30000000	30000000	30000000	30000000	30000000	30000000	30000000	30000000	50000000
	E006	23	ES-deriv	#4178AE	ESDR.H1.MSC	1	1	1	1	1	1	1	1	H1 Derived Mesenchymal Stem Cells	H1_Derived_Mesenchymal_Stem_Cells	ESC_DERIVED	ESCDerived	UCSD	CL	Male	NA	NA	SD	MSC-01;MSC-02	Class 1		UCSD.H1_Derived_Mesenchymal_Stem_Cells.Input.SK444.filt.tagAlign.gz;UCSD.H1_Derived_Mesenchymal_Stem_Cells.Input.SK443.filt.tagAlign.gz	UCSD.H1_Derived_Mesenchymal_Stem_Cells.H3K9me3.SK508.filt.tagAlign.gz;UCSD.H1_Derived_Mesenchymal_Stem_Cells.H3K9me3.SK507.filt.tagAlign.gz	UCSD.H1_Derived_Mesenchymal_Stem_Cells.H3K27me3.SK437.filt.tagAlign.gz;UCSD.H1_Derived_Mesenchymal_Stem_Cells.H3K27me3.SK439.filt.tagAlign.gz	UCSD.H1_Derived_Mesenchymal_Stem_Cells.H3K4me3.SK463.filt.tagAlign.gz;UCSD.H1_Derived_Mesenchymal_Stem_Cells.H3K4me3.SK467.filt.tagAlign.gz	UCSD.H1_Derived_Mesenchymal_Stem_Cells.H3K4me1.SK461.filt.tagAlign.gz;UCSD.H1_Derived_Mesenchymal_Stem_Cells.H3K4me1.SK465.filt.tagAlign.gz	UCSD.H1_Derived_Mesenchymal_Stem_Cells.H3K36me3.SK464.filt.tagAlign.gz;UCSD.H1_Derived_Mesenchymal_Stem_Cells.H3K36me3.SK460.filt.tagAlign.gz	UCSD.H1_Derived_Mesenchymal_Stem_Cells.H3K27ac.SK438.filt.tagAlign.gz;UCSD.H1_Derived_Mesenchymal_Stem_Cells.H3K27ac.SK436.filt.tagAlign.gz	UCSD.H1_Derived_Mesenchymal_Stem_Cells.H3K9ac.SK519.filt.tagAlign.gz;UCSD.H1_Derived_Mesenchymal_Stem_Cells.H3K9ac.SK518.filt.tagAlign.gz	UW.H1_Derived_Mesenchymal_Stem_Cells.ChromatinAccessibility.DS20671.filt.tagAlign.gz;UW.H1_Derived_Mesenchymal_Stem_Cells.ChromatinAccessibility.DS21042.filt.tagAlign.gz	E006	E006				30000000	30000000	30000000	20680231	30000000	30000000	30000000	30000000	50000000
	E062	24	Blood & T-cell	#55A354	BLD.PER.MONUC.PC	1	0	1	1	1	0	0	0	Primary mononuclear cells from peripheral blood	Peripheral_Blood_Mononuclear_Primary_Cells	BLOOD	PrimaryCell	UCSF-UBC	28Y, 27Y	Male	LIQUID	Caucasian, Indian/Arabian	C	TC010;TC012	Class 4		UCSF-UBC.Peripheral_Blood_Mononuclear_Primary_Cells.Input.TC016.filt.tagAlign.gz;UCSF-UBC.Peripheral_Blood_Mononuclear_Primary_Cells.Input.TC010.HS2625.filt.tagAlign.gz;UCSF-UBC.Peripheral_Blood_Mononuclear_Primary_Cells.Input.TC010.HS2626.filt.tagAlign.gz;UCSF-UBC.Peripheral_Blood_Mononuclear_Primary_Cells.Input.TC015.filt.tagAlign.gz;UCSF-UBC.Peripheral_Blood_Mononuclear_Primary_Cells.Input.TC0…	UCSF-UBC.Peripheral_Blood_Mononuclear_Primary_Cells.H3K9me3.TC016.filt.tagAlign.gz;UCSF-UBC.Peripheral_Blood_Mononuclear_Primary_Cells.H3K9me3.TC010.HS2622.filt.tagAlign.gz;UCSF-UBC.Peripheral_Blood_Mononuclear_Primary_Cells.H3K9me3.TC015.filt.tagAlign.gz;UCSF-UBC.Peripheral_Blood_Mononuclear_Primary_Cells.H3K9me3.TC012.HS2742.filt.tagAlign.gz	UCSF-UBC.Peripheral_Blood_Mononuclear_Primary_Cells.H3K27me3.TC010.HS2621.filt.tagAlign.gz;UCSF-UBC.Peripheral_Blood_Mononuclear_Primary_Cells.H3K27me3.TC016.filt.tagAlign.gz;UCSF-UBC.Peripheral_Blood_Mononuclear_Primary_Cells.H3K27me3.TC015.filt.tagAlign.gz	UCSF-UBC.Peripheral_Blood_Mononuclear_Primary_Cells.H3K4me3.TC015.filt.tagAlign.gz;UCSF-UBC.Peripheral_Blood_Mononuclear_Primary_Cells.H3K4me3.TC016.filt.tagAlign.gz	UCSF-UBC.Peripheral_Blood_Mononuclear_Primary_Cells.H3K4me1.TC015.filt.tagAlign.gz;UCSF-UBC.Peripheral_Blood_Mononuclear_Primary_Cells.H3K4me1.TC012.HS2745.filt.tagAlign.gz	UCSF-UBC.Peripheral_Blood_Mononuclear_Primary_Cells.H3K36me3.TC010.HS2624.filt.tagAlign.gz;UCSF-UBC.Peripheral_Blood_Mononuclear_Primary_Cells.H3K36me3.TC015.filt.tagAlign.gz	UCSF-UBC.Peripheral_Blood_Mononuclear_Primary_Cells.H3K27ac.TC015.filt.tagAlign.gz;UCSF-UBC.Peripheral_Blood_Mononuclear_Primary_Cells.H3K27ac.TC016.filt.tagAlign.gz	UCSF-UBC.Peripheral_Blood_Mononuclear_Primary_Cells.H3K9ac.TC010.HS2623.filt.tagAlign.gz;UCSF-UBC.Peripheral_Blood_Mononuclear_Primary_Cells.H3K9ac.TC012.HS2744.filt.tagAlign.gz		E062					30000000	30000000	30000000	30000000	30000000	30000000	30000000	30000000
	E034	25	Blood & T-cell	#55A354	BLD.CD3.PPC	-1	1	0	0	1	0	0	0	Primary T cells from peripheral blood	CD3_Primary_Cells_Peripheral_UW	BLOOD	PrimaryCell	UW	21Y, 37Y	Male	LIQUID	Caucasian, Hispanic	C	RO_01679;RO_01701	Class 5		UW.CD3_Primary_Cells.Input.RO_01701.Histone.DS21626.filt.tagAlign.gz	UW.CD3_Primary_Cells.H3K9me3.RO_01679.Histone.DS22898.filt.tagAlign.gz	UW.CD3_Primary_Cells.H3K27me3.RO_01679.Histone.DS22927.filt.tagAlign.gz	UW.CD3_Primary_Cells.H3K4me3.RO_01701.Histone.DS21703.filt.tagAlign.gz	UW.CD3_Primary_Cells.H3K4me1.RO_01679.Histone.DS22561.filt.tagAlign.gz	UW.CD3_Primary_Cells.H3K36me3.RO_01679.Histone.DS22563.filt.tagAlign.gz	UW.CD3_Primary_Cells.H3K27ac.RO_01701.Histone.DS21704.filt.tagAlign.gz		UW.CD3_Primary_Cells.ChromatinAccessibility.RO_01679.DS17198.filt.tagAlign.gz;UW.CD3_Primary_Cells.ChromatinAccessibility.RO_01701.DS17534.filt.tagAlign.gz						30000000	15811716	26362769	29358683	23290041	22795000	30000000		50000000
	E045	26	Blood & T-cell	#55A354	BLD.CD4.CD25I.CD127.TMEMPC	1	0	1	1	1	1	0	0	Primary T cells effector/memory enriched from peripheral blood	CD4+_CD25int_CD127+_Tmem_Primary_Cells	BLOOD	PrimaryCell	BI	Unknown	Unknown	LIQUID	Unknown	C	62;332	Class 5		BI.CD4+_CD25int_CD127+_Tmem_Primary_Cells.Input.Donor_332.filt.tagAlign.gz;BI.CD4+_CD25int_CD127+_Tmem_Primary_Cells.Input.Donor_62.filt.tagAlign.gz	BI.CD4+_CD25int_CD127+_Tmem_Primary_Cells.H3K9me3.Donor_62.filt.tagAlign.gz;BI.CD4+_CD25int_CD127+_Tmem_Primary_Cells.H3K9me3.Donor_332.filt.tagAlign.gz	BI.CD4+_CD25int_CD127+_Tmem_Primary_Cells.H3K27me3.Donor_62.filt.tagAlign.gz;BI.CD4+_CD25int_CD127+_Tmem_Primary_Cells.H3K27me3.Donor_332.filt.tagAlign.gz	BI.CD4+_CD25int_CD127+_Tmem_Primary_Cells.H3K4me3.Donor_62.filt.tagAlign.gz;BI.CD4+_CD25int_CD127+_Tmem_Primary_Cells.H3K4me3.Donor_332.filt.tagAlign.gz	BI.CD4+_CD25int_CD127+_Tmem_Primary_Cells.H3K4me1.Donor_332.filt.tagAlign.gz;BI.CD4+_CD25int_CD127+_Tmem_Primary_Cells.H3K4me1.Donor_62.filt.tagAlign.gz	BI.CD4+_CD25int_CD127+_Tmem_Primary_Cells.H3K36me3.Donor_62.filt.tagAlign.gz;BI.CD4+_CD25int_CD127+_Tmem_Primary_Cells.H3K36me3.Donor_332.filt.tagAlign.gz	BI.CD4+_CD25int_CD127+_Tmem_Primary_Cells.H3K27ac.Donor_332.filt.tagAlign.gz;BI.CD4+_CD25int_CD127+_Tmem_Primary_Cells.H3K27ac.Donor_62.filt.tagAlign.gz								30000000	26489913	20213799	23906500	18274815	30000000	16066464
	E033	27	Blood & T-cell	#55A354	BLD.CD3.CPC	-1	1	0	0	0	0	0	0	Primary T cells from cord blood	CD3_Primary_Cells_Cord_BI	BLOOD	PrimaryCell	BI	Fetus (GW unknown)	Unknown	LIQUID	Unknown	C	CD3_39661;CD3_39804;CD3_39811;CD3_39840	Class 3		BI.CD3_Primary_Cells.Input.CD3_39661.filt.tagAlign.gz	BI.CD3_Primary_Cells.H3K9me3.CD3_39840.filt.tagAlign.gz;BI.CD3_Primary_Cells.H3K9me3.CD3_39811.filt.tagAlign.gz	BI.CD3_Primary_Cells.H3K27me3.CD3_39804.filt.tagAlign.gz;BI.CD3_Primary_Cells.H3K27me3.CD3_39661.filt.tagAlign.gz	BI.CD3_Primary_Cells.H3K4me3.CD3_39661.filt.tagAlign.gz;BI.CD3_Primary_Cells.H3K4me3.CD3_39804.filt.tagAlign.gz	BI.CD3_Primary_Cells.H3K4me1.CD3_39811.filt.tagAlign.gz;BI.CD3_Primary_Cells.H3K4me1.CD3_39840.filt.tagAlign.gz	BI.CD3_Primary_Cells.H3K36me3.CD3_39804.filt.tagAlign.gz;BI.CD3_Primary_Cells.H3K36me3.CD3_39661.filt.tagAlign.gz			UW.CD3_Primary_Cells.ChromatinAccessibility.CB6_1-4-2011.DS17706.filt.tagAlign.gz;UW.CD3_Primary_Cells.ChromatinAccessibility.CB1_1-3-2011.DS17702.filt.tagAlign.gz			E033			6976206	14292311	21861431	15496888	14506208	20743473			42421955
	E044	28	Blood & T-cell	#55A354	BLD.CD4.CD25.CD127M.TREGPC	1	0	1	0	1	0	0	0	Primary T regulatory cells from peripheral blood	CD4+_CD25+_CD127-_Treg_Primary_Cells	BLOOD	PrimaryCell	BI	Unknown	Unknown	LIQUID	Unknown	C	62;332	Class 5		BI.CD4+_CD25+_CD127-_Treg_Primary_Cells.Input.Donor_62.filt.tagAlign.gz;BI.CD4+_CD25+_CD127-_Treg_Primary_Cells.Input.Donor_332.filt.tagAlign.gz	BI.CD4+_CD25+_CD127-_Treg_Primary_Cells.H3K9me3.Donor_332.filt.tagAlign.gz;BI.CD4+_CD25+_CD127-_Treg_Primary_Cells.H3K9me3.Donor_62.filt.tagAlign.gz	BI.CD4+_CD25+_CD127-_Treg_Primary_Cells.H3K27me3.Donor_62.filt.tagAlign.gz;BI.CD4+_CD25+_CD127-_Treg_Primary_Cells.H3K27me3.Donor_332.filt.tagAlign.gz	BI.CD4+_CD25+_CD127-_Treg_Primary_Cells.H3K4me3.Donor_62.filt.tagAlign.gz;BI.CD4+_CD25+_CD127-_Treg_Primary_Cells.H3K4me3.Donor_332.filt.tagAlign.gz	BI.CD4+_CD25+_CD127-_Treg_Primary_Cells.H3K4me1.Donor_62.filt.tagAlign.gz;BI.CD4+_CD25+_CD127-_Treg_Primary_Cells.H3K4me1.Donor_332.filt.tagAlign.gz	BI.CD4+_CD25+_CD127-_Treg_Primary_Cells.H3K36me3.Donor_332.filt.tagAlign.gz;BI.CD4+_CD25+_CD127-_Treg_Primary_Cells.H3K36me3.Donor_62.filt.tagAlign.gz	BI.CD4+_CD25+_CD127-_Treg_Primary_Cells.H3K27ac.Donor_62.filt.tagAlign.gz								30000000	30000000	30000000	15079580	17251849	29367051	8349932
	E043	29	Blood & T-cell	#55A354	BLD.CD4.CD25M.TPC	1	0	1	0	1	0	0	0	Primary T helper cells from peripheral blood	CD4+_CD25-_Th_Primary_Cells	BLOOD	PrimaryCell	BI	Unknown	Unknown	LIQUID	Unknown	C	62;332	Class 5		BI.CD4+_CD25-_Th_Primary_Cells.Input.Donor_62.filt.tagAlign.gz;BI.CD4+_CD25-_Th_Primary_Cells.Input.Donor_332.filt.tagAlign.gz	BI.CD4+_CD25-_Th_Primary_Cells.H3K9me3.Donor_332.filt.tagAlign.gz;BI.CD4+_CD25-_Th_Primary_Cells.H3K9me3.Donor_62.filt.tagAlign.gz	BI.CD4+_CD25-_Th_Primary_Cells.H3K27me3.Donor_332.filt.tagAlign.gz;BI.CD4+_CD25-_Th_Primary_Cells.H3K27me3.Donor_62.filt.tagAlign.gz	BI.CD4+_CD25-_Th_Primary_Cells.H3K4me3.Donor_332.filt.tagAlign.gz;BI.CD4+_CD25-_Th_Primary_Cells.H3K4me3.Donor_62.filt.tagAlign.gz	BI.CD4+_CD25-_Th_Primary_Cells.H3K4me1.Donor_332.filt.tagAlign.gz;BI.CD4+_CD25-_Th_Primary_Cells.H3K4me1.Donor_62.filt.tagAlign.gz	BI.CD4+_CD25-_Th_Primary_Cells.H3K36me3.Donor_332.filt.tagAlign.gz;BI.CD4+_CD25-_Th_Primary_Cells.H3K36me3.Donor_62.filt.tagAlign.gz	BI.CD4+_CD25-_Th_Primary_Cells.H3K27ac.Donor_332.filt.tagAlign.gz								30000000	30000000	30000000	15739497	23864916	30000000	16749018
	E039	30	Blood & T-cell	#55A354	BLD.CD4.CD25M.CD45RA.NPC	1	0	1	1	1	1	0	0	Primary T helper naive cells from peripheral blood	CD4+_CD25-_CD45RA+_Naive_Primary_Cells	BLOOD	PrimaryCell	BI	Unknown	Unknown	LIQUID	Unknown	C	62;332	Class 5		BI.CD4+_CD25-_CD45RA+_Naive_Primary_Cells.Input.Donor_332.filt.tagAlign.gz;BI.CD4+_CD25-_CD45RA+_Naive_Primary_Cells.Input.Donor_62.filt.tagAlign.gz	BI.CD4+_CD25-_CD45RA+_Naive_Primary_Cells.H3K9me3.Donor_332.filt.tagAlign.gz;BI.CD4+_CD25-_CD45RA+_Naive_Primary_Cells.H3K9me3.Donor_62.filt.tagAlign.gz	BI.CD4+_CD25-_CD45RA+_Naive_Primary_Cells.H3K27me3.Donor_332.filt.tagAlign.gz;BI.CD4+_CD25-_CD45RA+_Naive_Primary_Cells.H3K27me3.Donor_62.filt.tagAlign.gz	BI.CD4+_CD25-_CD45RA+_Naive_Primary_Cells.H3K4me3.Donor_332.filt.tagAlign.gz;BI.CD4+_CD25-_CD45RA+_Naive_Primary_Cells.H3K4me3.Donor_62.filt.tagAlign.gz	BI.CD4+_CD25-_CD45RA+_Naive_Primary_Cells.H3K4me1.Donor_332.filt.tagAlign.gz;BI.CD4+_CD25-_CD45RA+_Naive_Primary_Cells.H3K4me1.Donor_62.filt.tagAlign.gz	BI.CD4+_CD25-_CD45RA+_Naive_Primary_Cells.H3K36me3.Donor_332.filt.tagAlign.gz;BI.CD4+_CD25-_CD45RA+_Naive_Primary_Cells.H3K36me3.Donor_62.filt.tagAlign.gz	BI.CD4+_CD25-_CD45RA+_Naive_Primary_Cells.H3K27ac.Donor_62.filt.tagAlign.gz								30000000	30000000	23952515	22287960	30000000	30000000	13028034
	E041	31	Blood & T-cell	#55A354	BLD.CD4.CD25M.IL17M.PL.TPC	1	0	1	1	1	1	0	0	Primary T helper cells PMA-I stimulated	CD4+_CD25-_IL17-_PMA-Ionomycin_stimulated_MACS_purified_Th_Primary_Cells	BLOOD	PrimaryCell	BI	Unknown	Unknown	LIQUID	Unknown	C	62;332	Class 5		BI.CD4+_CD25-_IL17-_PMA-Ionomycin_stimulated_MACS_purified_Th_Primary_Cells.Input.Donor_62.filt.tagAlign.gz;BI.CD4+_CD25-_IL17-_PMA-Ionomycin_stimulated_MACS_purified_Th_Primary_Cells.Input.Donor_332.filt.tagAlign.gz	BI.CD4+_CD25-_IL17-_PMA-Ionomycin_stimulated_MACS_purified_Th_Primary_Cells.H3K9me3.Donor_332.filt.tagAlign.gz;BI.CD4+_CD25-_IL17-_PMA-Ionomycin_stimulated_MACS_purified_Th_Primary_Cells.H3K9me3.Donor_62.filt.tagAlign.gz	BI.CD4+_CD25-_IL17-_PMA-Ionomycin_stimulated_MACS_purified_Th_Primary_Cells.H3K27me3.Donor_332.filt.tagAlign.gz;BI.CD4+_CD25-_IL17-_PMA-Ionomycin_stimulated_MACS_purified_Th_Primary_Cells.H3K27me3.Donor_62.filt.tagAlign.gz	BI.CD4+_CD25-_IL17-_PMA-Ionomycin_stimulated_MACS_purified_Th_Primary_Cells.H3K4me3.Donor_62.filt.tagAlign.gz;BI.CD4+_CD25-_IL17-_PMA-Ionomycin_stimulated_MACS_purified_Th_Primary_Cells.H3K4me3.Donor_332.filt.tagAlign.gz	BI.CD4+_CD25-_IL17-_PMA-Ionomycin_stimulated_MACS_purified_Th_Primary_Cells.H3K4me1.Donor_332.filt.tagAlign.gz;BI.CD4+_CD25-_IL17-_PMA-Ionomycin_stimulated_MACS_purified_Th_Primary_Cells.H3K4me1.Donor_62.filt.tagAlign.gz	BI.CD4+_CD25-_IL17-_PMA-Ionomycin_stimulated_MACS_purified_Th_Primary_Cells.H3K36me3.Donor_62.filt.tagAlign.gz;BI.CD4+_CD25-_IL17-_PMA-Ionomycin_stimulated_MACS_purified_Th_Primary_Cells.H3K36me3.Donor_332.filt.tagAlign.gz	BI.CD4+_CD25-_IL17-_PMA-Ionomycin_stimulated_MACS_purified_Th_Primary_Cells.H3K27ac.Donor_62.filt.tagAlign.gz;BI.CD4+_CD25-_IL17-_PMA-Ionomycin_stimulated_MACS_purified_Th_Primary_Cells.H3K27ac.Donor_332.filt.tagAlign.gz								30000000	30000000	30000000	30000000	30000000	30000000	30000000
	E042	32	Blood & T-cell	#55A354	BLD.CD4.CD25M.IL17P.PL.TPC	1	0	1	0	1	0	0	0	Primary T helper 17 cells PMA-I stimulated	CD4+_CD25-_IL17+_PMA-Ionomcyin_stimulated_Th17_Primary_Cells	BLOOD	PrimaryCell	BI	Unknown	Unknown	LIQUID	Unknown	C	62;332	Class 5		BI.CD4+_CD25-_IL17+_PMA-Ionomcyin_stimulated_Th17_Primary_Cells.Input.Donor_332.filt.tagAlign.gz;BI.CD4+_CD25-_IL17+_PMA-Ionomcyin_stimulated_Th17_Primary_Cells.Input.Donor_62.filt.tagAlign.gz	BI.CD4+_CD25-_IL17+_PMA-Ionomcyin_stimulated_Th17_Primary_Cells.H3K9me3.Donor_62.filt.tagAlign.gz;BI.CD4+_CD25-_IL17+_PMA-Ionomcyin_stimulated_Th17_Primary_Cells.H3K9me3.Donor_332.filt.tagAlign.gz	BI.CD4+_CD25-_IL17+_PMA-Ionomcyin_stimulated_Th17_Primary_Cells.H3K27me3.Donor_62.filt.tagAlign.gz;BI.CD4+_CD25-_IL17+_PMA-Ionomcyin_stimulated_Th17_Primary_Cells.H3K27me3.Donor_332.filt.tagAlign.gz	BI.CD4+_CD25-_IL17+_PMA-Ionomcyin_stimulated_Th17_Primary_Cells.H3K4me3.Donor_62.filt.tagAlign.gz;BI.CD4+_CD25-_IL17+_PMA-Ionomcyin_stimulated_Th17_Primary_Cells.H3K4me3.Donor_332.filt.tagAlign.gz	BI.CD4+_CD25-_IL17+_PMA-Ionomcyin_stimulated_Th17_Primary_Cells.H3K4me1.Donor_62.filt.tagAlign.gz;BI.CD4+_CD25-_IL17+_PMA-Ionomcyin_stimulated_Th17_Primary_Cells.H3K4me1.Donor_332.filt.tagAlign.gz	BI.CD4+_CD25-_IL17+_PMA-Ionomcyin_stimulated_Th17_Primary_Cells.H3K36me3.Donor_332.filt.tagAlign.gz;BI.CD4+_CD25-_IL17+_PMA-Ionomcyin_stimulated_Th17_Primary_Cells.H3K36me3.Donor_62.filt.tagAlign.gz	BI.CD4+_CD25-_IL17+_PMA-Ionomcyin_stimulated_Th17_Primary_Cells.H3K27ac.Donor_62.filt.tagAlign.gz								30000000	30000000	30000000	30000000	30000000	30000000	18697770
	E040	33	Blood & T-cell	#55A354	BLD.CD4.CD25M.CD45RO.MPC	1	0	1	1	1	1	0	0	Primary T helper memory cells from peripheral blood 1	CD4+_CD25-_CD45RO+_Memory_Primary_Cells	BLOOD	PrimaryCell	BI	Unknown	Unknown	LIQUID	Unknown	C	62;332	Class 5		BI.CD4+_CD25-_CD45RO+_Memory_Primary_Cells.Input.Donor_62.filt.tagAlign.gz;BI.CD4+_CD25-_CD45RO+_Memory_Primary_Cells.Input.Donor_332.filt.tagAlign.gz	BI.CD4+_CD25-_CD45RO+_Memory_Primary_Cells.H3K9me3.Donor_62.filt.tagAlign.gz;BI.CD4+_CD25-_CD45RO+_Memory_Primary_Cells.H3K9me3.Donor_332.filt.tagAlign.gz	BI.CD4+_CD25-_CD45RO+_Memory_Primary_Cells.H3K27me3.Donor_62.filt.tagAlign.gz;BI.CD4+_CD25-_CD45RO+_Memory_Primary_Cells.H3K27me3.Donor_332.filt.tagAlign.gz	BI.CD4+_CD25-_CD45RO+_Memory_Primary_Cells.H3K4me3.Donor_332.filt.tagAlign.gz;BI.CD4+_CD25-_CD45RO+_Memory_Primary_Cells.H3K4me3.Donor_62.filt.tagAlign.gz	BI.CD4+_CD25-_CD45RO+_Memory_Primary_Cells.H3K4me1.Donor_332.filt.tagAlign.gz;BI.CD4+_CD25-_CD45RO+_Memory_Primary_Cells.H3K4me1.Donor_62.filt.tagAlign.gz	BI.CD4+_CD25-_CD45RO+_Memory_Primary_Cells.H3K36me3.Donor_332.filt.tagAlign.gz;BI.CD4+_CD25-_CD45RO+_Memory_Primary_Cells.H3K36me3.Donor_62.filt.tagAlign.gz	BI.CD4+_CD25-_CD45RO+_Memory_Primary_Cells.H3K27ac.Donor_62.filt.tagAlign.gz								30000000	27340291	30000000	17101591	19489837	25486830	8607710
	E037	34	Blood & T-cell	#55A354	BLD.CD4.MPC	1	0	1	0	1	0	0	0	Primary T helper memory cells from peripheral blood 2	CD4_Memory_Primary_Cells	BLOOD	PrimaryCell	BI	Unknown	Unknown	LIQUID	Unknown	C	20;Donor_100_7_pooled_leukopaks_Jan_7_2011;Donor_101_8_pooled_leukopaks_Jan_20_2011	Class 4		BI.CD4_Memory_Primary_Cells.Input.20.filt.tagAlign.gz;BI.CD4_Memory_Primary_Cells.Input.Donor_101_8_pooled_leukopaks_Jan_20_2011.filt.tagAlign.gz;BI.CD4_Memory_Primary_Cells.Input.Donor_100_7_pooled_leukopaks_Jan_7_2011.filt.tagAlign.gz	BI.CD4_Memory_Primary_Cells.H3K9me3.Donor_101_8_pooled_leukopaks_Jan_20_2011.filt.tagAlign.gz;BI.CD4_Memory_Primary_Cells.H3K9me3.Donor_100_7_pooled_leukopaks_Jan_7_2011.filt.tagAlign.gz	BI.CD4_Memory_Primary_Cells.H3K27me3.Donor_100_7_pooled_leukopaks_Jan_7_2011.filt.tagAlign.gz;BI.CD4_Memory_Primary_Cells.H3K27me3.Donor_101_8_pooled_leukopaks_Jan_20_2011.filt.tagAlign.gz	BI.CD4_Memory_Primary_Cells.H3K4me3.Donor_100_7_pooled_leukopaks_Jan_7_2011.filt.tagAlign.gz;BI.CD4_Memory_Primary_Cells.H3K4me3.20.filt.tagAlign.gz;BI.CD4_Memory_Primary_Cells.H3K4me3.Donor_101_8_pooled_leukopaks_Jan_20_2011.filt.tagAlign.gz	BI.CD4_Memory_Primary_Cells.H3K4me1.Donor_101_8_pooled_leukopaks_Jan_20_2011.filt.tagAlign.gz;BI.CD4_Memory_Primary_Cells.H3K4me1.Donor_100_7_pooled_leukopaks_Jan_7_2011.filt.tagAlign.gz	BI.CD4_Memory_Primary_Cells.H3K36me3.Donor_100_7_pooled_leukopaks_Jan_7_2011.filt.tagAlign.gz;BI.CD4_Memory_Primary_Cells.H3K36me3.Donor_101_8_pooled_leukopaks_Jan_20_2011.filt.tagAlign.gz	BI.CD4_Memory_Primary_Cells.H3K27ac.Donor_101_8_pooled_leukopaks_Jan_20_2011.filt.tagAlign.gz;BI.CD4_Memory_Primary_Cells.H3K27ac.Donor_100_7_pooled_leukopaks_Jan_7_2011.filt.tagAlign.gz			E037			E037		30000000	30000000	30000000	30000000	30000000	30000000	27666693
	E048	35	Blood & T-cell	#55A354	BLD.CD8.MPC	1	0	1	0	1	0	0	0	Primary T CD8+ memory cells from peripheral blood	CD8_Memory_Primary_Cells	BLOOD	PrimaryCell	BI	Unknown	Unknown	LIQUID	Unknown	C	100_7_pooled_leukopaks_Jan_7_2011;101_8_pooled_leukopaks_Jan_20_2011	Class 5		BI.CD8_Memory_Primary_Cells.Input.Donor_100_7_pooled_leukopaks_Jan_7_2011.filt.tagAlign.gz;BI.CD8_Memory_Primary_Cells.Input.Donor_101_8_pooled_leukopaks_Jan_20_2011.filt.tagAlign.gz	BI.CD8_Memory_Primary_Cells.H3K9me3.Donor_101_8_pooled_leukopaks_Jan_20_2011.filt.tagAlign.gz;BI.CD8_Memory_Primary_Cells.H3K9me3.Donor_100_7_pooled_leukopaks_Jan_7_2011.filt.tagAlign.gz	BI.CD8_Memory_Primary_Cells.H3K27me3.Donor_100_7_pooled_leukopaks_Jan_7_2011.filt.tagAlign.gz;BI.CD8_Memory_Primary_Cells.H3K27me3.Donor_101_8_pooled_leukopaks_Jan_20_2011.filt.tagAlign.gz	BI.CD8_Memory_Primary_Cells.H3K4me3.Donor_100_7_pooled_leukopaks_Jan_7_2011.filt.tagAlign.gz;BI.CD8_Memory_Primary_Cells.H3K4me3.Donor_101_8_pooled_leukopaks_Jan_20_2011.filt.tagAlign.gz	BI.CD8_Memory_Primary_Cells.H3K4me1.Donor_100_7_pooled_leukopaks_Jan_7_2011.filt.tagAlign.gz;BI.CD8_Memory_Primary_Cells.H3K4me1.Donor_101_8_pooled_leukopaks_Jan_20_2011.filt.tagAlign.gz	BI.CD8_Memory_Primary_Cells.H3K36me3.Donor_101_8_pooled_leukopaks_Jan_20_2011.filt.tagAlign.gz;BI.CD8_Memory_Primary_Cells.H3K36me3.Donor_100_7_pooled_leukopaks_Jan_7_2011.filt.tagAlign.gz	BI.CD8_Memory_Primary_Cells.H3K27ac.Donor_100_7_pooled_leukopaks_Jan_7_2011.filt.tagAlign.gz								30000000	30000000	30000000	30000000	30000000	30000000	13923505
	E038	36	Blood & T-cell	#55A354	BLD.CD4.NPC	1	0	1	0	1	0	0	0	Primary T helper naive cells from peripheral blood	CD4_Naive_Primary_Cells	BLOOD	PrimaryCell	BI;UCSF-UBC	Unknown	Mixed	LIQUID	Unknown	C	Donor_100_7_pooled_leukopaks_Jan_7_2011;Donor_101_8_pooled_leukopaks_Jan_20_2011;TC001	Class 4		BI.CD4_Naive_Primary_Cells.Input.Donor_101_8_pooled_leukopaks_Jan_20_2011.filt.tagAlign.gz;BI.CD4_Naive_Primary_Cells.Input.Donor_100_7_pooled_leukopaks_Jan_7_2011.filt.tagAlign.gz	BI.CD4_Naive_Primary_Cells.H3K9me3.Donor_101_8_pooled_leukopaks_Jan_20_2011.filt.tagAlign.gz;BI.CD4_Naive_Primary_Cells.H3K9me3.Donor_100_7_pooled_leukopaks_Jan_7_2011.filt.tagAlign.gz	BI.CD4_Naive_Primary_Cells.H3K27me3.Donor_100_7_pooled_leukopaks_Jan_7_2011.filt.tagAlign.gz;BI.CD4_Naive_Primary_Cells.H3K27me3.Donor_101_8_pooled_leukopaks_Jan_20_2011.filt.tagAlign.gz	BI.CD4_Naive_Primary_Cells.H3K4me3.Donor_100_7_pooled_leukopaks_Jan_7_2011.filt.tagAlign.gz;BI.CD4_Naive_Primary_Cells.H3K4me3.Donor_101_8_pooled_leukopaks_Jan_20_2011.filt.tagAlign.gz	BI.CD4_Naive_Primary_Cells.H3K4me1.Donor_100_7_pooled_leukopaks_Jan_7_2011.filt.tagAlign.gz;BI.CD4_Naive_Primary_Cells.H3K4me1.Donor_101_8_pooled_leukopaks_Jan_20_2011.filt.tagAlign.gz	UCSF-UBC.CD4_Naive_Primary_Cells.H3K36me3.TC001.filt.tagAlign.gz;BI.CD4_Naive_Primary_Cells.H3K36me3.Donor_100_7_pooled_leukopaks_Jan_7_2011.filt.tagAlign.gz;BI.CD4_Naive_Primary_Cells.H3K36me3.Donor_101_8_pooled_leukopaks_Jan_20_2011.filt.tagAlign.gz	BI.CD4_Naive_Primary_Cells.H3K27ac.Donor_100_7_pooled_leukopaks_Jan_7_2011.filt.tagAlign.gz;BI.CD4_Naive_Primary_Cells.H3K27ac.Donor_101_8_pooled_leukopaks_Jan_20_2011.filt.tagAlign.gz	UCSF-UBC.CD4_Naive_Primary_Cells.H3K9ac.TC001.filt.tagAlign.gz		E038			E038		30000000	30000000	30000000	30000000	30000000	30000000	11693164	4657202
	E047	37	Blood & T-cell	#55A354	BLD.CD8.NPC	1	0	1	0	1	0	0	0	Primary T CD8+ naive cells from peripheral blood	CD8_Naive_Primary_Cells	BLOOD	PrimaryCell	BI;UCSF-UBC	Unknown	Mixed	LIQUID	Unknown	C	Donor_100_7_pooled_leukopaks_Jan_7_2011;Donor_101_8_pooled_leukopaks_Jan_20_2011;TC001;TC010	Class 4		UCSF-UBC.CD8_Naive_Primary_Cells.Input.TC001.filt.tagAlign.gz;BI.CD8_Naive_Primary_Cells.Input.Donor_101_8_pooled_leukopaks_Jan_20_2011.filt.tagAlign.gz;BI.CD8_Naive_Primary_Cells.Input.Donor_100_7_pooled_leukopaks_Jan_7_2011.filt.tagAlign.gz	BI.CD8_Naive_Primary_Cells.H3K9me3.Donor_100_7_pooled_leukopaks_Jan_7_2011.filt.tagAlign.gz;BI.CD8_Naive_Primary_Cells.H3K9me3.Donor_101_8_pooled_leukopaks_Jan_20_2011.filt.tagAlign.gz;UCSF-UBC.CD8_Naive_Primary_Cells.H3K9me3.TC001.filt.tagAlign.gz	BI.CD8_Naive_Primary_Cells.H3K27me3.Donor_100_7_pooled_leukopaks_Jan_7_2011.filt.tagAlign.gz;BI.CD8_Naive_Primary_Cells.H3K27me3.Donor_101_8_pooled_leukopaks_Jan_20_2011.filt.tagAlign.gz;UCSF-UBC.CD8_Naive_Primary_Cells.H3K27me3.TC001.filt.tagAlign.gz	BI.CD8_Naive_Primary_Cells.H3K4me3.Donor_100_7_pooled_leukopaks_Jan_7_2011.filt.tagAlign.gz;UCSF-UBC.CD8_Naive_Primary_Cells.H3K4me3.TC001.filt.tagAlign.gz;BI.CD8_Naive_Primary_Cells.H3K4me3.Donor_101_8_pooled_leukopaks_Jan_20_2011.filt.tagAlign.gz;UCSF-UBC.CD8_Naive_Primary_Cells.H3K4me3.TC010.filt.tagAlign.gz	BI.CD8_Naive_Primary_Cells.H3K4me1.Donor_100_7_pooled_leukopaks_Jan_7_2011.filt.tagAlign.gz;BI.CD8_Naive_Primary_Cells.H3K4me1.Donor_101_8_pooled_leukopaks_Jan_20_2011.filt.tagAlign.gz;UCSF-UBC.CD8_Naive_Primary_Cells.H3K4me1.TC001.filt.tagAlign.gz	BI.CD8_Naive_Primary_Cells.H3K36me3.Donor_101_8_pooled_leukopaks_Jan_20_2011.filt.tagAlign.gz;UCSF-UBC.CD8_Naive_Primary_Cells.H3K36me3.TC001.filt.tagAlign.gz;BI.CD8_Naive_Primary_Cells.H3K36me3.Donor_100_7_pooled_leukopaks_Jan_7_2011.filt.tagAlign.gz	BI.CD8_Naive_Primary_Cells.H3K27ac.Donor_100_7_pooled_leukopaks_Jan_7_2011.filt.tagAlign.gz;BI.CD8_Naive_Primary_Cells.H3K27ac.Donor_101_8_pooled_leukopaks_Jan_20_2011.filt.tagAlign.gz	UCSF-UBC.CD8_Naive_Primary_Cells.H3K9ac.TC001.filt.tagAlign.gz		E047			E047		30000000	30000000	30000000	30000000	30000000	30000000	30000000	14693961
	E029	38	HSC & B-cell	#678C69	BLD.CD14.PC	1	1	1	1	1	1	0	0	Primary monocytes from peripheral blood	CD14_Primary_Cells	BLOOD	PrimaryCell	UW	21Y, 37Y	Male	LIQUID	Hispanic, Unknown	C	RO_01701;RO_01721	Class 5		UW.CD14_Primary_Cells.Input.RO_01701.Histone.DS21627.filt.tagAlign.gz	UW.CD14_Primary_Cells.H3K9me3.RO_01721.Histone.DS22404.filt.tagAlign.gz	UW.CD14_Primary_Cells.H3K27me3.RO_01721.Histone.DS22405.filt.tagAlign.gz	UW.CD14_Primary_Cells.H3K4me3.RO_01701.Histone.DS21707.filt.tagAlign.gz	UW.CD14_Primary_Cells.H3K4me1.RO_01721.Histone.DS22403.filt.tagAlign.gz	UW.CD14_Primary_Cells.H3K36me3.RO_01721.Histone.DS22406.filt.tagAlign.gz	UW.CD14_Primary_Cells.H3K27ac.RO_01721.Histone.DS22926.filt.tagAlign.gz		UW.CD14_Primary_Cells.ChromatinAccessibility.RO_01689.DS17391.filt.tagAlign.gz;UW.CD14_Primary_Cells.ChromatinAccessibility.RO_01701.DS17889.filt.tagAlign.gz						20538113	25333602	22730312	20973878	30000000	20505089	21286511		47268789
	E031	39	HSC & B-cell	#678C69	BLD.CD19.CPC	-1	1	0	0	0	0	0	0	Primary B cells from cord blood	CD19_Primary_Cells_Cord_BI	BLOOD	PrimaryCell	BI	Fetus (GW unknown)	Mixed	LIQUID	Unknown	C	130;CD19_12/22/08;CD19_12/29/08;CD19_2/20/09;CD19_6/26/08;CD19_8/1/08	Class 4		BI.CD19_Primary_Cells.Input.CD19_8_1_08.filt.tagAlign.gz	BI.CD19_Primary_Cells.H3K9me3.CD19_2_20_09.filt.tagAlign.gz;BI.CD19_Primary_Cells.H3K9me3.CD19_12_29_08.filt.tagAlign.gz	BI.CD19_Primary_Cells.H3K27me3.CD19_6_26_08.filt.tagAlign.gz;BI.CD19_Primary_Cells.H3K27me3.CD19_12_22_08.filt.tagAlign.gz	BI.CD19_Primary_Cells.H3K4me3.CD19_12_22_08.filt.tagAlign.gz;BI.CD19_Primary_Cells.H3K4me3.CD19_8_1_08.filt.tagAlign.gz	BI.CD19_Primary_Cells.H3K4me1.130.filt.tagAlign.gz	BI.CD19_Primary_Cells.H3K36me3.CD19_8_1_08.filt.tagAlign.gz;BI.CD19_Primary_Cells.H3K36me3.CD19_12_29_08.filt.tagAlign.gz						E031			5082252	13943470	20840272	12954668	8036019	14915361
	E035	40	HSC & B-cell	#678C69	BLD.CD34.PC	-1	1	0	0	0	0	0	0	Primary hematopoietic stem cells	CD34_Primary_Cells	BLOOD	PrimaryCell	BI	Fetus (GW unknown)	Unknown	LIQUID	Unknown	C	CD34_39629;CD34_39661;CD34_39804;CD34_39811;CD34_39889	Class 4		BI.CD34_Primary_Cells.Input.CD34_39661.filt.tagAlign.gz	BI.CD34_Primary_Cells.H3K9me3.CD34_39811.filt.tagAlign.gz;BI.CD34_Primary_Cells.H3K9me3.CD34_39889.filt.tagAlign.gz	BI.CD34_Primary_Cells.H3K27me3.CD34_39804.filt.tagAlign.gz;BI.CD34_Primary_Cells.H3K27me3.CD34_39661.filt.tagAlign.gz	BI.CD34_Primary_Cells.H3K4me3.CD34_39629.filt.tagAlign.gz;BI.CD34_Primary_Cells.H3K4me3.CD34_39804.filt.tagAlign.gz	BI.CD34_Primary_Cells.H3K4me1.CD34_39889.filt.tagAlign.gz;BI.CD34_Primary_Cells.H3K4me1.CD34_39811.filt.tagAlign.gz	BI.CD34_Primary_Cells.H3K36me3.CD34_39811.filt.tagAlign.gz;BI.CD34_Primary_Cells.H3K36me3.CD34_39661.filt.tagAlign.gz						E035			8809704	14536824	16737779	10711857	18886104	14619986
	E051	41	HSC & B-cell	#678C69	BLD.MOB.CD34.PC.M	1	1	1	1	0	0	0	0	Primary hematopoietic stem cells G-CSF-mobilized Male	Mobilized_CD34_Primary_Cells_Male	BLOOD	PrimaryCell	BI	42Y	Male	LIQUID	Caucasian	SD	RO_01562	Class 3		BI.Mobilized_CD34_Primary_Cells.Input.RO_01562.filt.tagAlign.gz	BI.Mobilized_CD34_Primary_Cells.H3K9me3.RO_01562.filt.tagAlign.gz	BI.Mobilized_CD34_Primary_Cells.H3K27me3.RO_01562.filt.tagAlign.gz	BI.Mobilized_CD34_Primary_Cells.H3K4me3.RO_01562.filt.tagAlign.gz	BI.Mobilized_CD34_Primary_Cells.H3K4me1.RO_01562.filt.tagAlign.gz	BI.Mobilized_CD34_Primary_Cells.H3K36me3.RO_01562.filt.tagAlign.gz			UW.Mobilized_CD34_Primary_Cells.ChromatinAccessibility.RO_01562.DS13196.filt.tagAlign.gz			E051			29874758	24606120	30000000	27644389	30000000	27890075			43764509
	E050	42	HSC & B-cell	#678C69	BLD.MOB.CD34.PC.F	1	0	1	0	1	0	0	0	Primary hematopoietic stem cells G-CSF-mobilized Female	Mobilized_CD34_Primary_Cells_Female	BLOOD	PrimaryCell	BI	Fetus (GW unknown)	Mixed	LIQUID	Unknown	C	RO_01480;RO_01508;RO_01536;RO_01549;UW_RO_01480	Class 2		BI.Mobilized_CD34_Primary_Cells.Input.Mobilized_CD34_5_28_09.filt.tagAlign.gz;BI.Mobilized_CD34_Primary_Cells.Input.RO_01480.filt.tagAlign.gz;BI.Mobilized_CD34_Primary_Cells.Input.RO_01536.filt.tagAlign.gz;BI.Mobilized_CD34_Primary_Cells.Input.RO_01549.filt.tagAlign.gz;BI.Mobilized_CD34_Primary_Cells.Input.UW_RO_01480.filt.tagAlign.gz;BI.Mobilized_CD34_Primary_Cells.Input.UW_RO_01536.filt.tagAlig…	BI.Mobilized_CD34_Primary_Cells.H3K9me3.Mobilized_CD34_5_28_09.filt.tagAlign.gz;BI.Mobilized_CD34_Primary_Cells.H3K9me3.RO_01536.filt.tagAlign.gz;BI.Mobilized_CD34_Primary_Cells.H3K9me3.UW_RO_01480.filt.tagAlign.gz;BI.Mobilized_CD34_Primary_Cells.H3K9me3.UW_RO_01536.filt.tagAlign.gz;BI.Mobilized_CD34_Primary_Cells.H3K9me3.UW_RO_01549.filt.tagAlign.gz	BI.Mobilized_CD34_Primary_Cells.H3K27me3.Mobilized_CD34_5_28_09.filt.tagAlign.gz;BI.Mobilized_CD34_Primary_Cells.H3K27me3.RO_01536.filt.tagAlign.gz;BI.Mobilized_CD34_Primary_Cells.H3K27me3.RO_01549.filt.tagAlign.gz;BI.Mobilized_CD34_Primary_Cells.H3K27me3.UW_RO_01480.filt.tagAlign.gz;BI.Mobilized_CD34_Primary_Cells.H3K27me3.UW_RO_01536.filt.tagAlign.gz;BI.Mobilized_CD34_Primary_Cells.H3K27me3.UW_…	BI.Mobilized_CD34_Primary_Cells.H3K4me3.Mobilized_CD34_5_28_09.filt.tagAlign.gz;BI.Mobilized_CD34_Primary_Cells.H3K4me3.UW_RO_01480.filt.tagAlign.gz;BI.Mobilized_CD34_Primary_Cells.H3K4me3.UW_RO_01536.filt.tagAlign.gz;BI.Mobilized_CD34_Primary_Cells.H3K4me3.UW_RO_01549.filt.tagAlign.gz	BI.Mobilized_CD34_Primary_Cells.H3K4me1.Mobilized_CD34_5_28_09.filt.tagAlign.gz;BI.Mobilized_CD34_Primary_Cells.H3K4me1.RO_01480.filt.tagAlign.gz;BI.Mobilized_CD34_Primary_Cells.H3K4me1.RO_01536.filt.tagAlign.gz;BI.Mobilized_CD34_Primary_Cells.H3K4me1.UW_RO_01549.filt.tagAlign.gz	BI.Mobilized_CD34_Primary_Cells.H3K36me3.Mobilized_CD34_5_28_09.filt.tagAlign.gz;BI.Mobilized_CD34_Primary_Cells.H3K36me3.RO_01536.filt.tagAlign.gz;BI.Mobilized_CD34_Primary_Cells.H3K36me3.RO_01549.filt.tagAlign.gz;BI.Mobilized_CD34_Primary_Cells.H3K36me3.UW_RO_01480.filt.tagAlign.gz;BI.Mobilized_CD34_Primary_Cells.H3K36me3.UW_RO_01536.filt.tagAlign.gz	BI.Mobilized_CD34_Primary_Cells.H3K27ac.RO_01480.filt.tagAlign.gz;BI.Mobilized_CD34_Primary_Cells.H3K27ac.RO_01536.filt.tagAlign.gz;BI.Mobilized_CD34_Primary_Cells.H3K27ac.RO_01549.filt.tagAlign.gz		UW.Mobilized_CD34_Primary_Cells.ChromatinAccessibility.RO_01480.DS12771.filt.tagAlign.gz;UW.Mobilized_CD34_Primary_Cells.ChromatinAccessibility.RO_01508.DS11202.filt.tagAlign.gz;UW.Mobilized_CD34_Primary_Cells.ChromatinAccessibility.RO_01536.DS12336.filt.tagAlign.gz;UW.Mobilized_CD34_Primary_Cells.ChromatinAccessibility.RO_01536.DS12339.filt.tagAlign.gz;UW.Mobilized_CD34_Primary_Cells.ChromatinAc…	E050	E050	E050			30000000	30000000	30000000	30000000	30000000	30000000	27469261		50000000
	E036	43	HSC & B-cell	#678C69	BLD.CD34.CC	0	1	1	1	0	0	0	0	Primary hematopoietic stem cells short term culture	CD34_Cultured_Cells	BLOOD	PrimaryCell	BI	Fetus (GW unknown)	Unknown	LIQUID	Unknown	C	123;cultured_CD34_2_20_09	Class 5		BI.CD34_Cultured_Cells.Input.123.filt.tagAlign.gz	BI.CD34_Cultured_Cells.H3K9me3.123.filt.tagAlign.gz;BI.CD34_Cultured_Cells.H3K9me3.cultured_CD34_2_20_09.filt.tagAlign.gz	BI.CD34_Cultured_Cells.H3K27me3.cultured_CD34_2_20_09.filt.tagAlign.gz	BI.CD34_Cultured_Cells.H3K4me3.cultured_CD34_2_20_09.filt.tagAlign.gz;BI.CD34_Cultured_Cells.H3K4me3.123.filt.tagAlign.gz	BI.CD34_Cultured_Cells.H3K4me1.cultured_CD34_2_20_09.filt.tagAlign.gz;BI.CD34_Cultured_Cells.H3K4me1.123.filt.tagAlign.gz	BI.CD34_Cultured_Cells.H3K36me3.cultured_CD34_2_20_09.filt.tagAlign.gz;BI.CD34_Cultured_Cells.H3K36me3.123.filt.tagAlign.gz									27825398	26103738	11911610	30000000	30000000	30000000
	E032	44	HSC & B-cell	#678C69	BLD.CD19.PPC	1	0	1	1	1	1	0	0	Primary B cells from peripheral blood	CD19_Primary_Cells_Peripheral_UW	BLOOD	PrimaryCell	UW	21Y, 37Y	Male	LIQUID	Caucasian, Hispanic	C	RO_01679;RO_01701	Class 5		UW.CD19_Primary_Cells.Input.RO_01701.Histone.DS21628.filt.tagAlign.gz	UW.CD19_Primary_Cells.H3K9me3.RO_01679.Histone.DS22899.filt.tagAlign.gz	UW.CD19_Primary_Cells.H3K27me3.RO_01679.Histone.DS22585.filt.tagAlign.gz	UW.CD19_Primary_Cells.H3K4me3.RO_01701.Histone.DS21711.filt.tagAlign.gz	UW.CD19_Primary_Cells.H3K4me1.RO_01679.Histone.DS22584.filt.tagAlign.gz	UW.CD19_Primary_Cells.H3K36me3.RO_01679.Histone.DS22586.filt.tagAlign.gz	UW.CD19_Primary_Cells.H3K27ac.RO_01701.Histone.DS21712.filt.tagAlign.gz		UW.CD19_Primary_Cells.ChromatinAccessibility.RO_01701.DS17440.filt.tagAlign.gz;UW.CD19_Primary_Cells.ChromatinAccessibility.RO_01679.DS17186.filt.tagAlign.gz						29763728	30000000	22790761	25182460	29388415	22973371	21597113		50000000
	E046	45	HSC & B-cell	#678C69	BLD.CD56.PC	1	0	1	1	1	1	0	0	Primary Natural Killer cells from peripheral blood	CD56_Primary_Cells	BLOOD	PrimaryCell	UW	21Y, 37Y	Male	LIQUID	Caucasian, Hispanic	C	RO_01679;RO_01701	Class 5		UW.CD56_Primary_Cells.Input.RO_01701.Histone.DS21629.filt.tagAlign.gz	UW.CD56_Primary_Cells.H3K9me3.RO_01679.Histone.DS22900.filt.tagAlign.gz	UW.CD56_Primary_Cells.H3K27me3.RO_01679.Histone.DS22594.filt.tagAlign.gz	UW.CD56_Primary_Cells.H3K4me3.RO_01701.Histone.DS21715.filt.tagAlign.gz	UW.CD56_Primary_Cells.H3K4me1.RO_01679.Histone.DS22593.filt.tagAlign.gz	UW.CD56_Primary_Cells.H3K36me3.RO_01679.Histone.DS22595.filt.tagAlign.gz	UW.CD56_Primary_Cells.H3K27ac.RO_01701.Histone.DS21716.filt.tagAlign.gz		UW.CD56_Primary_Cells.ChromatinAccessibility.RO_01701.DS17443.filt.tagAlign.gz;UW.CD56_Primary_Cells.ChromatinAccessibility.RO_01679.DS17189.filt.tagAlign.gz						25203628	16243150	28109323	21939444	22437596	30000000	26447569		50000000
	E030	46	HSC & B-cell	#678C69	BLD.CD15.PC	-1	1	0	0	0	0	0	0	Primary neutrophils from peripheral blood	CD15_Primary_Cells	BLOOD	PrimaryCell	BI	Fetus (GW unknown)	Male	LIQUID	Unknown	SD	23	Class 5		BI.CD15_Primary_Cells.Input.23.filt.tagAlign.gz	BI.CD15_Primary_Cells.H3K9me3.23.filt.tagAlign.gz	BI.CD15_Primary_Cells.H3K27me3.23.filt.tagAlign.gz	BI.CD15_Primary_Cells.H3K4me3.23.filt.tagAlign.gz	BI.CD15_Primary_Cells.H3K4me1.23.filt.tagAlign.gz	BI.CD15_Primary_Cells.H3K36me3.23.filt.tagAlign.gz						E030			27121937	24338419	10454083	7134392	30000000	22327666
	E026	47	Mesench	#B65C73	STRM.MRW.MSC	1	0	1	0	1	0	0	0	Bone Marrow Derived Cultured Mesenchymal Stem Cells	Bone_Marrow_Derived_Mesenchymal_Stem_Cell_Cultured_Cells	STROMAL_CONNECTIVE	PrimaryCulture	BI	57Y, unknown, unkown, unkown	Unknown	SOLID	Unknown	SD	57;58;59;60	Class 5		BI.Bone_Marrow_Derived_Mesenchymal_Stem_Cell_Cultured_Cells.Input.58.filt.tagAlign.gz;BI.Bone_Marrow_Derived_Mesenchymal_Stem_Cell_Cultured_Cells.Input.59.filt.tagAlign.gz;BI.Bone_Marrow_Derived_Mesenchymal_Stem_Cell_Cultured_Cells.Input.60.filt.tagAlign.gz;BI.Bone_Marrow_Derived_Mesenchymal_Stem_Cell_Cultured_Cells.Input.57.filt.tagAlign.gz	BI.Bone_Marrow_Derived_Mesenchymal_Stem_Cell_Cultured_Cells.H3K9me3.59.filt.tagAlign.gz;BI.Bone_Marrow_Derived_Mesenchymal_Stem_Cell_Cultured_Cells.H3K9me3.58.filt.tagAlign.gz;BI.Bone_Marrow_Derived_Mesenchymal_Stem_Cell_Cultured_Cells.H3K9me3.60.filt.tagAlign.gz;BI.Bone_Marrow_Derived_Mesenchymal_Stem_Cell_Cultured_Cells.H3K9me3.57.filt.tagAlign.gz	BI.Bone_Marrow_Derived_Mesenchymal_Stem_Cell_Cultured_Cells.H3K27me3.60.filt.tagAlign.gz;BI.Bone_Marrow_Derived_Mesenchymal_Stem_Cell_Cultured_Cells.H3K27me3.59.filt.tagAlign.gz;BI.Bone_Marrow_Derived_Mesenchymal_Stem_Cell_Cultured_Cells.H3K27me3.58.filt.tagAlign.gz;BI.Bone_Marrow_Derived_Mesenchymal_Stem_Cell_Cultured_Cells.H3K27me3.57.filt.tagAlign.gz	BI.Bone_Marrow_Derived_Mesenchymal_Stem_Cell_Cultured_Cells.H3K4me3.58.filt.tagAlign.gz;BI.Bone_Marrow_Derived_Mesenchymal_Stem_Cell_Cultured_Cells.H3K4me3.59.filt.tagAlign.gz;BI.Bone_Marrow_Derived_Mesenchymal_Stem_Cell_Cultured_Cells.H3K4me3.57.filt.tagAlign.gz;BI.Bone_Marrow_Derived_Mesenchymal_Stem_Cell_Cultured_Cells.H3K4me3.60.filt.tagAlign.gz	BI.Bone_Marrow_Derived_Mesenchymal_Stem_Cell_Cultured_Cells.H3K4me1.58.filt.tagAlign.gz;BI.Bone_Marrow_Derived_Mesenchymal_Stem_Cell_Cultured_Cells.H3K4me1.59.filt.tagAlign.gz;BI.Bone_Marrow_Derived_Mesenchymal_Stem_Cell_Cultured_Cells.H3K4me1.57.filt.tagAlign.gz;BI.Bone_Marrow_Derived_Mesenchymal_Stem_Cell_Cultured_Cells.H3K4me1.60.filt.tagAlign.gz	BI.Bone_Marrow_Derived_Mesenchymal_Stem_Cell_Cultured_Cells.H3K36me3.59.filt.tagAlign.gz;BI.Bone_Marrow_Derived_Mesenchymal_Stem_Cell_Cultured_Cells.H3K36me3.58.filt.tagAlign.gz;BI.Bone_Marrow_Derived_Mesenchymal_Stem_Cell_Cultured_Cells.H3K36me3.60.filt.tagAlign.gz;BI.Bone_Marrow_Derived_Mesenchymal_Stem_Cell_Cultured_Cells.H3K36me3.57.filt.tagAlign.gz	BI.Bone_Marrow_Derived_Mesenchymal_Stem_Cell_Cultured_Cells.H3K27ac.60.filt.tagAlign.gz;BI.Bone_Marrow_Derived_Mesenchymal_Stem_Cell_Cultured_Cells.H3K27ac.59.filt.tagAlign.gz;BI.Bone_Marrow_Derived_Mesenchymal_Stem_Cell_Cultured_Cells.H3K27ac.58.filt.tagAlign.gz;BI.Bone_Marrow_Derived_Mesenchymal_Stem_Cell_Cultured_Cells.H3K27ac.57.filt.tagAlign.gz	BI.Bone_Marrow_Derived_Mesenchymal_Stem_Cell_Cultured_Cells.H3K9ac.57.filt.tagAlign.gz;BI.Bone_Marrow_Derived_Mesenchymal_Stem_Cell_Cultured_Cells.H3K9ac.58.filt.tagAlign.gz;BI.Bone_Marrow_Derived_Mesenchymal_Stem_Cell_Cultured_Cells.H3K9ac.60.filt.tagAlign.gz;BI.Bone_Marrow_Derived_Mesenchymal_Stem_Cell_Cultured_Cells.H3K9ac.59.filt.tagAlign.gz				E026			30000000	30000000	30000000	30000000	30000000	30000000	30000000	30000000
	E049	48	Mesench	#B65C73	STRM.CHON.MRW.DR.MSC	1	0	1	1	1	1	0	0	Mesenchymal Stem Cell Derived Chondrocyte Cultured Cells	Chondrocytes_from_Bone_Marrow_Derived_Mesenchymal_Stem_Cell_Cultured_Cells	STROMAL_CONNECTIVE	PrimaryCulture	BI	Unknown	Unknown	SOLID	Unknown	C	57;58;59;60	Class 5		BI.Chondrocytes_from_Bone_Marrow_Derived_Mesenchymal_Stem_Cell_Cultured_Cells.Input.58.filt.tagAlign.gz;BI.Chondrocytes_from_Bone_Marrow_Derived_Mesenchymal_Stem_Cell_Cultured_Cells.Input.57.filt.tagAlign.gz;BI.Chondrocytes_from_Bone_Marrow_Derived_Mesenchymal_Stem_Cell_Cultured_Cells.Input.59.filt.tagAlign.gz;BI.Chondrocytes_from_Bone_Marrow_Derived_Mesenchymal_Stem_Cell_Cultured_Cells.Input.60.…	BI.Chondrocytes_from_Bone_Marrow_Derived_Mesenchymal_Stem_Cell_Cultured_Cells.H3K9me3.59.filt.tagAlign.gz;BI.Chondrocytes_from_Bone_Marrow_Derived_Mesenchymal_Stem_Cell_Cultured_Cells.H3K9me3.58.filt.tagAlign.gz;BI.Chondrocytes_from_Bone_Marrow_Derived_Mesenchymal_Stem_Cell_Cultured_Cells.H3K9me3.57.filt.tagAlign.gz;BI.Chondrocytes_from_Bone_Marrow_Derived_Mesenchymal_Stem_Cell_Cultured_Cells.H3K…	BI.Chondrocytes_from_Bone_Marrow_Derived_Mesenchymal_Stem_Cell_Cultured_Cells.H3K27me3.58.filt.tagAlign.gz;BI.Chondrocytes_from_Bone_Marrow_Derived_Mesenchymal_Stem_Cell_Cultured_Cells.H3K27me3.60.filt.tagAlign.gz;BI.Chondrocytes_from_Bone_Marrow_Derived_Mesenchymal_Stem_Cell_Cultured_Cells.H3K27me3.59.filt.tagAlign.gz;BI.Chondrocytes_from_Bone_Marrow_Derived_Mesenchymal_Stem_Cell_Cultured_Cells.…	BI.Chondrocytes_from_Bone_Marrow_Derived_Mesenchymal_Stem_Cell_Cultured_Cells.H3K4me3.57.filt.tagAlign.gz;BI.Chondrocytes_from_Bone_Marrow_Derived_Mesenchymal_Stem_Cell_Cultured_Cells.H3K4me3.60.filt.tagAlign.gz;BI.Chondrocytes_from_Bone_Marrow_Derived_Mesenchymal_Stem_Cell_Cultured_Cells.H3K4me3.58.filt.tagAlign.gz;BI.Chondrocytes_from_Bone_Marrow_Derived_Mesenchymal_Stem_Cell_Cultured_Cells.H3K…	BI.Chondrocytes_from_Bone_Marrow_Derived_Mesenchymal_Stem_Cell_Cultured_Cells.H3K4me1.57.filt.tagAlign.gz;BI.Chondrocytes_from_Bone_Marrow_Derived_Mesenchymal_Stem_Cell_Cultured_Cells.H3K4me1.58.filt.tagAlign.gz;BI.Chondrocytes_from_Bone_Marrow_Derived_Mesenchymal_Stem_Cell_Cultured_Cells.H3K4me1.59.filt.tagAlign.gz;BI.Chondrocytes_from_Bone_Marrow_Derived_Mesenchymal_Stem_Cell_Cultured_Cells.H3K…	BI.Chondrocytes_from_Bone_Marrow_Derived_Mesenchymal_Stem_Cell_Cultured_Cells.H3K36me3.58.filt.tagAlign.gz;BI.Chondrocytes_from_Bone_Marrow_Derived_Mesenchymal_Stem_Cell_Cultured_Cells.H3K36me3.57.filt.tagAlign.gz;BI.Chondrocytes_from_Bone_Marrow_Derived_Mesenchymal_Stem_Cell_Cultured_Cells.H3K36me3.60.filt.tagAlign.gz;BI.Chondrocytes_from_Bone_Marrow_Derived_Mesenchymal_Stem_Cell_Cultured_Cells.…	BI.Chondrocytes_from_Bone_Marrow_Derived_Mesenchymal_Stem_Cell_Cultured_Cells.H3K27ac.57.filt.tagAlign.gz;BI.Chondrocytes_from_Bone_Marrow_Derived_Mesenchymal_Stem_Cell_Cultured_Cells.H3K27ac.59.filt.tagAlign.gz;BI.Chondrocytes_from_Bone_Marrow_Derived_Mesenchymal_Stem_Cell_Cultured_Cells.H3K27ac.58.filt.tagAlign.gz;BI.Chondrocytes_from_Bone_Marrow_Derived_Mesenchymal_Stem_Cell_Cultured_Cells.H3K…	BI.Chondrocytes_from_Bone_Marrow_Derived_Mesenchymal_Stem_Cell_Cultured_Cells.H3K9ac.57.filt.tagAlign.gz;BI.Chondrocytes_from_Bone_Marrow_Derived_Mesenchymal_Stem_Cell_Cultured_Cells.H3K9ac.60.filt.tagAlign.gz;BI.Chondrocytes_from_Bone_Marrow_Derived_Mesenchymal_Stem_Cell_Cultured_Cells.H3K9ac.58.filt.tagAlign.gz;BI.Chondrocytes_from_Bone_Marrow_Derived_Mesenchymal_Stem_Cell_Cultured_Cells.H3K9ac…				E049			30000000	30000000	30000000	30000000	30000000	30000000	30000000	30000000
	E025	49	Mesench	#B65C73	FAT.ADIP.DR.MSC	1	1	1	1	0	0	0	0	Adipose Derived Mesenchymal Stem Cell Cultured Cells	Adipose_Derived_Mesenchymal_Stem_Cell_Cultured_Cells	FAT	PrimaryCulture	BI	31Y, 59Y, 41Y	Female	SOLID	Unknown	C	1;92;93	Class 5		BI.Adipose_Derived_Mesenchymal_Stem_Cell_Cultured_Cells.Input.92.filt.tagAlign.gz;BI.Adipose_Derived_Mesenchymal_Stem_Cell_Cultured_Cells.Input.1.filt.tagAlign.gz;BI.Adipose_Derived_Mesenchymal_Stem_Cell_Cultured_Cells.Input.93.filt.tagAlign.gz	BI.Adipose_Derived_Mesenchymal_Stem_Cell_Cultured_Cells.H3K9me3.92.filt.tagAlign.gz;BI.Adipose_Derived_Mesenchymal_Stem_Cell_Cultured_Cells.H3K9me3.1.filt.tagAlign.gz;BI.Adipose_Derived_Mesenchymal_Stem_Cell_Cultured_Cells.H3K9me3.93.filt.tagAlign.gz	BI.Adipose_Derived_Mesenchymal_Stem_Cell_Cultured_Cells.H3K27me3.1.filt.tagAlign.gz;BI.Adipose_Derived_Mesenchymal_Stem_Cell_Cultured_Cells.H3K27me3.92.filt.tagAlign.gz	BI.Adipose_Derived_Mesenchymal_Stem_Cell_Cultured_Cells.H3K4me3.1.filt.tagAlign.gz;BI.Adipose_Derived_Mesenchymal_Stem_Cell_Cultured_Cells.H3K4me3.92.filt.tagAlign.gz;BI.Adipose_Derived_Mesenchymal_Stem_Cell_Cultured_Cells.H3K4me3.93.filt.tagAlign.gz	BI.Adipose_Derived_Mesenchymal_Stem_Cell_Cultured_Cells.H3K4me1.93.filt.tagAlign.gz;BI.Adipose_Derived_Mesenchymal_Stem_Cell_Cultured_Cells.H3K4me1.1.filt.tagAlign.gz;BI.Adipose_Derived_Mesenchymal_Stem_Cell_Cultured_Cells.H3K4me1.92.filt.tagAlign.gz	BI.Adipose_Derived_Mesenchymal_Stem_Cell_Cultured_Cells.H3K36me3.92.filt.tagAlign.gz;BI.Adipose_Derived_Mesenchymal_Stem_Cell_Cultured_Cells.H3K36me3.93.filt.tagAlign.gz;BI.Adipose_Derived_Mesenchymal_Stem_Cell_Cultured_Cells.H3K36me3.1.filt.tagAlign.gz		BI.Adipose_Derived_Mesenchymal_Stem_Cell_Cultured_Cells.H3K9ac.92.filt.tagAlign.gz;BI.Adipose_Derived_Mesenchymal_Stem_Cell_Cultured_Cells.H3K9ac.93.filt.tagAlign.gz;BI.Adipose_Derived_Mesenchymal_Stem_Cell_Cultured_Cells.H3K9ac.1.2.filt.tagAlign.gz;BI.Adipose_Derived_Mesenchymal_Stem_Cell_Cultured_Cells.H3K9ac.1.3.filt.tagAlign.gz							30000000	30000000	30000000	30000000	30000000	30000000		30000000
	E023	50	Mesench	#B65C73	FAT.MSC.DR.ADIP	1	1	1	1	0	0	0	0	Mesenchymal Stem Cell Derived Adipocyte Cultured Cells	Mesenchymal_Stem_Cell_Derived_Adipocyte_Cultured_Cells	FAT	PrimaryCulture	BI	CL	Female	NA	NA	SD	92;93	Class 5		BI.Mesenchymal_Stem_Cell_Derived_Adipocyte_Cultured_Cells.Input.92.filt.tagAlign.gz;BI.Mesenchymal_Stem_Cell_Derived_Adipocyte_Cultured_Cells.Input.93.filt.tagAlign.gz	BI.Mesenchymal_Stem_Cell_Derived_Adipocyte_Cultured_Cells.H3K9me3.92.filt.tagAlign.gz;BI.Mesenchymal_Stem_Cell_Derived_Adipocyte_Cultured_Cells.H3K9me3.93.filt.tagAlign.gz	BI.Mesenchymal_Stem_Cell_Derived_Adipocyte_Cultured_Cells.H3K27me3.92.filt.tagAlign.gz;BI.Mesenchymal_Stem_Cell_Derived_Adipocyte_Cultured_Cells.H3K27me3.93.filt.tagAlign.gz	BI.Mesenchymal_Stem_Cell_Derived_Adipocyte_Cultured_Cells.H3K4me3.93.filt.tagAlign.gz;BI.Mesenchymal_Stem_Cell_Derived_Adipocyte_Cultured_Cells.H3K4me3.92.filt.tagAlign.gz	BI.Mesenchymal_Stem_Cell_Derived_Adipocyte_Cultured_Cells.H3K4me1.93.filt.tagAlign.gz;BI.Mesenchymal_Stem_Cell_Derived_Adipocyte_Cultured_Cells.H3K4me1.92.filt.tagAlign.gz	BI.Mesenchymal_Stem_Cell_Derived_Adipocyte_Cultured_Cells.H3K36me3.92.filt.tagAlign.gz;BI.Mesenchymal_Stem_Cell_Derived_Adipocyte_Cultured_Cells.H3K36me3.93.filt.tagAlign.gz		BI.Mesenchymal_Stem_Cell_Derived_Adipocyte_Cultured_Cells.H3K9ac.92.filt.tagAlign.gz;BI.Mesenchymal_Stem_Cell_Derived_Adipocyte_Cultured_Cells.H3K9ac.93.filt.tagAlign.gz							30000000	30000000	30000000	30000000	30000000	30000000		30000000
	E052	51	Myosat	#E67326	MUS.SAT	1	0	1	0	0	0	0	0	Muscle Satellite Cultured Cells	Muscle_Satellite_Cultured_Cells	MUSCLE	PrimaryCulture	BI	Unknown	Unknown	SOLID	Unknown	C	hSKM-1;hSKM-2;hSKM-3	Class 5		BI.Muscle_Satellite_Cultured_Cells.Input.hSKM-2.filt.tagAlign.gz;BI.Muscle_Satellite_Cultured_Cells.Input.hSKM-3.filt.tagAlign.gz;BI.Muscle_Satellite_Cultured_Cells.Input.hSKM-1.filt.tagAlign.gz	BI.Muscle_Satellite_Cultured_Cells.H3K9me3.hSKM-1.filt.tagAlign.gz;BI.Muscle_Satellite_Cultured_Cells.H3K9me3.hSKM-2.filt.tagAlign.gz;BI.Muscle_Satellite_Cultured_Cells.H3K9me3.hSKM-3.filt.tagAlign.gz	BI.Muscle_Satellite_Cultured_Cells.H3K27me3.hSKM-1.filt.tagAlign.gz;BI.Muscle_Satellite_Cultured_Cells.H3K27me3.hSKM-3.filt.tagAlign.gz;BI.Muscle_Satellite_Cultured_Cells.H3K27me3.hSKM-2.filt.tagAlign.gz	BI.Muscle_Satellite_Cultured_Cells.H3K4me3.hSKM-1.filt.tagAlign.gz;BI.Muscle_Satellite_Cultured_Cells.H3K4me3.hSKM-3.filt.tagAlign.gz;BI.Muscle_Satellite_Cultured_Cells.H3K4me3.hSKM-2.filt.tagAlign.gz	BI.Muscle_Satellite_Cultured_Cells.H3K4me1.hSKM-1.filt.tagAlign.gz;BI.Muscle_Satellite_Cultured_Cells.H3K4me1.hSKM-2.filt.tagAlign.gz;BI.Muscle_Satellite_Cultured_Cells.H3K4me1.hSKM-3.filt.tagAlign.gz	BI.Muscle_Satellite_Cultured_Cells.H3K36me3.hSKM-2.filt.tagAlign.gz;BI.Muscle_Satellite_Cultured_Cells.H3K36me3.hSKM-3.filt.tagAlign.gz;BI.Muscle_Satellite_Cultured_Cells.H3K36me3.hSKM-1.filt.tagAlign.gz		BI.Muscle_Satellite_Cultured_Cells.H3K9ac.hSKM-1.filt.tagAlign.gz;BI.Muscle_Satellite_Cultured_Cells.H3K9ac.hSKM-2.filt.tagAlign.gz;BI.Muscle_Satellite_Cultured_Cells.H3K9ac.hSKM-3.filt.tagAlign.gz							30000000	30000000	30000000	30000000	30000000	30000000		30000000
	E055	52	Epithelial	#FF9D0C	SKIN.PEN.FRSK.FIB.01	1	1	1	1	1	1	0	0	Foreskin Fibroblast Primary Cells skin01	Penis_Foreskin_Fibroblast_Primary_Cells_skin01	SKIN	PrimaryCulture	UCSF-UBC	0Y	Male	SOLID	Unknown	SD	skin01	Class 3		UCSF-UBC.Penis_Foreskin_Fibroblast_Primary_Cells.Input.skin01.filt.tagAlign.gz	UCSF-UBC.Penis_Foreskin_Fibroblast_Primary_Cells.H3K9me3.skin01.filt.tagAlign.gz	UCSF-UBC.Penis_Foreskin_Fibroblast_Primary_Cells.H3K27me3.skin01.filt.tagAlign.gz	UCSF-UBC.Penis_Foreskin_Fibroblast_Primary_Cells.H3K4me3.skin01.filt.tagAlign.gz	UCSF-UBC.Penis_Foreskin_Fibroblast_Primary_Cells.H3K4me1.skin01.filt.tagAlign.gz	UCSF-UBC.Penis_Foreskin_Fibroblast_Primary_Cells.H3K36me3.skin01.filt.tagAlign.gz	UCSF-UBC.Penis_Foreskin_Fibroblast_Primary_Cells.H3K27ac.skin01.filt.tagAlign.gz		UW.Penis_Foreskin_Fibroblast_Primary_Cells.ChromatinAccessibility.skin01.DS18229.filt.tagAlign.gz;UW.Penis_Foreskin_Fibroblast_Primary_Cells.ChromatinAccessibility.skin01.DS18224.filt.tagAlign.gz	E055			E055		30000000	30000000	30000000	30000000	30000000	30000000	27122965		50000000
	E056	53	Epithelial	#FF9D0C	SKIN.PEN.FRSK.FIB.02	1	0	1	0	1	0	0	0	Foreskin Fibroblast Primary Cells skin02	Penis_Foreskin_Fibroblast_Primary_Cells_skin02	SKIN	PrimaryCulture	UCSF-UBC	0Y	Male	SOLID	Unknown	SD	skin02	Class 3		UCSF-UBC.Penis_Foreskin_Fibroblast_Primary_Cells.Input.skin02.filt.tagAlign.gz	UCSF-UBC.Penis_Foreskin_Fibroblast_Primary_Cells.H3K9me3.skin02.filt.tagAlign.gz	UCSF-UBC.Penis_Foreskin_Fibroblast_Primary_Cells.H3K27me3.skin02.filt.tagAlign.gz	UCSF-UBC.Penis_Foreskin_Fibroblast_Primary_Cells.H3K4me3.skin02.filt.tagAlign.gz	UCSF-UBC.Penis_Foreskin_Fibroblast_Primary_Cells.H3K4me1.skin02.filt.tagAlign.gz	UCSF-UBC.Penis_Foreskin_Fibroblast_Primary_Cells.H3K36me3.skin02.filt.tagAlign.gz	UCSF-UBC.Penis_Foreskin_Fibroblast_Primary_Cells.H3K27ac.skin02.filt.tagAlign.gz		UW.Penis_Foreskin_Fibroblast_Primary_Cells.ChromatinAccessibility.skin02.DS18256.filt.tagAlign.gz;UW.Penis_Foreskin_Fibroblast_Primary_Cells.ChromatinAccessibility.skin02.DS18252.filt.tagAlign.gz	E056			E056		30000000	30000000	30000000	30000000	30000000	30000000	28351221		50000000
	E059	54	Epithelial	#FF9D0C	SKIN.PEN.FRSK.MEL.01	1	0	1	0	1	0	0	0	Foreskin Melanocyte Primary Cells skin01	Penis_Foreskin_Melanocyte_Primary_Cells_skin01	SKIN	PrimaryCulture	UCSF-UBC	0Y	Male	SOLID	Unknown	SD	skin01	Class 3		UCSF-UBC.Penis_Foreskin_Melanocyte_Primary_Cells.Input.skin01.filt.tagAlign.gz	UCSF-UBC.Penis_Foreskin_Melanocyte_Primary_Cells.H3K9me3.skin01.filt.tagAlign.gz	UCSF-UBC.Penis_Foreskin_Melanocyte_Primary_Cells.H3K27me3.skin01.filt.tagAlign.gz	UCSF-UBC.Penis_Foreskin_Melanocyte_Primary_Cells.H3K4me3.skin01.filt.tagAlign.gz	UCSF-UBC.Penis_Foreskin_Melanocyte_Primary_Cells.H3K4me1.skin01.filt.tagAlign.gz	UCSF-UBC.Penis_Foreskin_Melanocyte_Primary_Cells.H3K36me3.skin01.filt.tagAlign.gz	UCSF-UBC.Penis_Foreskin_Melanocyte_Primary_Cells.H3K27ac.skin01.filt.tagAlign.gz		UW.Penis_Foreskin_Melanocyte_Primary_Cells.ChromatinAccessibility.skin01.DS18601.filt.tagAlign.gz;UW.Penis_Foreskin_Melanocyte_Primary_Cells.ChromatinAccessibility.skin01.DS18590.filt.tagAlign.gz	E059			E059		15680694	20445766	30000000	20064844	29536082	30000000	30000000		50000000
	E061	55	Epithelial	#FF9D0C	SKIN.PEN.FRSK.MEL.03	1	1	1	1	1	1	0	0	Foreskin Melanocyte Primary Cells skin03	Penis_Foreskin_Melanocyte_Primary_Cells_skin03	SKIN	PrimaryCulture	UCSF-UBC	0Y	Male	SOLID	Unknown	SD	skin03	Class 4		UCSF-UBC.Penis_Foreskin_Melanocyte_Primary_Cells.Input.skin03.filt.tagAlign.gz	UCSF-UBC.Penis_Foreskin_Melanocyte_Primary_Cells.H3K9me3.skin03.filt.tagAlign.gz	UCSF-UBC.Penis_Foreskin_Melanocyte_Primary_Cells.H3K27me3.skin03.filt.tagAlign.gz	UCSF-UBC.Penis_Foreskin_Melanocyte_Primary_Cells.H3K4me3.skin03.filt.tagAlign.gz	UCSF-UBC.Penis_Foreskin_Melanocyte_Primary_Cells.H3K4me1.skin03.filt.tagAlign.gz	UCSF-UBC.Penis_Foreskin_Melanocyte_Primary_Cells.H3K36me3.skin03.filt.tagAlign.gz	UCSF-UBC.Penis_Foreskin_Melanocyte_Primary_Cells.H3K27ac.skin03.filt.tagAlign.gz			E061			E061		30000000	25015133	30000000	30000000	30000000	30000000	30000000
	E057	56	Epithelial	#FF9D0C	SKIN.PEN.FRSK.KER.02	-1	1	0	0	0	0	0	0	Foreskin Keratinocyte Primary Cells skin02	Penis_Foreskin_Keratinocyte_Primary_Cells_skin02	SKIN	PrimaryCulture	UCSF-UBC	0Y	Male	SOLID	Unknown	SD	skin02	Class 2		UCSF-UBC.Penis_Foreskin_Keratinocyte_Primary_Cells.Input.skin02.filt.tagAlign.gz	UCSF-UBC.Penis_Foreskin_Keratinocyte_Primary_Cells.H3K9me3.skin02.filt.tagAlign.gz	UCSF-UBC.Penis_Foreskin_Keratinocyte_Primary_Cells.H3K27me3.skin02.filt.tagAlign.gz	UCSF-UBC.Penis_Foreskin_Keratinocyte_Primary_Cells.H3K4me3.skin02.filt.tagAlign.gz	UCSF-UBC.Penis_Foreskin_Keratinocyte_Primary_Cells.H3K4me1.skin02.filt.tagAlign.gz	UCSF-UBC.Penis_Foreskin_Keratinocyte_Primary_Cells.H3K36me3.skin02.filt.tagAlign.gz			UW.Penis_Foreskin_Keratinocyte_Primary_Cells.ChromatinAccessibility.skin02.DS18718.filt.tagAlign.gz;UW.Penis_Foreskin_Keratinocyte_Primary_Cells.ChromatinAccessibility.skin02.DS18714.filt.tagAlign.gz	E057			E057		15483267	9888165	29784474	24525728	26736934	21936760			50000000
	E058	57	Epithelial	#FF9D0C	SKIN.PEN.FRSK.KER.03	1	1	1	1	1	1	0	0	Foreskin Keratinocyte Primary Cells skin03	Penis_Foreskin_Keratinocyte_Primary_Cells_skin03	SKIN	PrimaryCulture	UCSF-UBC	0Y	Male	SOLID	Unknown	SD	skin03	Class 2		UCSF-UBC.Penis_Foreskin_Keratinocyte_Primary_Cells.Input.skin03.filt.tagAlign.gz	UCSF-UBC.Penis_Foreskin_Keratinocyte_Primary_Cells.H3K9me3.skin03.filt.tagAlign.gz	UCSF-UBC.Penis_Foreskin_Keratinocyte_Primary_Cells.H3K27me3.skin03.filt.tagAlign.gz	UCSF-UBC.Penis_Foreskin_Keratinocyte_Primary_Cells.H3K4me3.skin03.filt.tagAlign.gz	UCSF-UBC.Penis_Foreskin_Keratinocyte_Primary_Cells.H3K4me1.skin03.filt.tagAlign.gz	UCSF-UBC.Penis_Foreskin_Keratinocyte_Primary_Cells.H3K36me3.skin03.filt.tagAlign.gz	UCSF-UBC.Penis_Foreskin_Keratinocyte_Primary_Cells.H3K27ac.skin03.filt.tagAlign.gz			E058	E058		E058		30000000	30000000	30000000	30000000	30000000	30000000	30000000
	E028	58	Epithelial	#FF9D0C	BRST.HMEC.35	-1	1	0	0	0	0	0	0	Breast variant Human Mammary Epithelial Cells (vHMEC)	Breast_vHMEC	BREAST	PrimaryCulture	UCSF-UBC	18Y	Female	SOLID	Caucasian	SD	RM035	Class 3		UCSF-UBC.Breast_vHMEC.Input.RM035.HS2620.filt.tagAlign.gz;UCSF-UBC.Breast_vHMEC.Input.RM035.HS1995.filt.tagAlign.gz	UCSF-UBC.Breast_vHMEC.H3K9me3.RM035.HS2617.filt.tagAlign.gz	UCSF-UBC.Breast_vHMEC.H3K27me3.RM035.filt.tagAlign.gz	UCSF-UBC.Breast_vHMEC.H3K4me3.RM035.HS2615.filt.tagAlign.gz	UCSF-UBC.Breast_vHMEC.H3K4me1.RM035.HS2618.filt.tagAlign.gz;UCSF-UBC.Breast_vHMEC.H3K4me1.RM035.HS1994.filt.tagAlign.gz	UCSF-UBC.Breast_vHMEC.H3K36me3.RM035.filt.tagAlign.gz			UW.Breast_vHMEC.ChromatinAccessibility.RM035.DS18406.filt.tagAlign.gz;UW.Breast_vHMEC.ChromatinAccessibility.RM035.DS18438.filt.tagAlign.gz	E028			E028		30000000	16619959	16918735	6978187	30000000	30000000			50000000
Bad SBS DNA Methylation dataset. mCRF DNA Methylation data is fine.	E027	59	Epithelial	#FF9D0C	BRST.MYO	1	1	1	1	0	0	0	0	Breast Myoepithelial Primary Cells	Breast_Myoepithelial_Cells	BREAST	PrimaryCell	UCSF-UBC	36Y,33Y	Female	SOLID	African-American, African-American	C	RM066;RM080	Class 2		UCSF-UBC.Breast_Myoepithelial_Cells.Input.RM066.filt.tagAlign.gz;UCSF-UBC.Breast_Myoepithelial_Cells.Input.RM080.filt.tagAlign.gz	UCSF-UBC.Breast_Myoepithelial_Cells.H3K9me3.RM080.filt.tagAlign.gz;UCSF-UBC.Breast_Myoepithelial_Cells.H3K9me3.RM066.filt.tagAlign.gz	UCSF-UBC.Breast_Myoepithelial_Cells.H3K27me3.RM066.filt.tagAlign.gz;UCSF-UBC.Breast_Myoepithelial_Cells.H3K27me3.RM080.filt.tagAlign.gz	UCSF-UBC.Breast_Myoepithelial_Cells.H3K4me3.RM066.filt.tagAlign.gz;UCSF-UBC.Breast_Myoepithelial_Cells.H3K4me3.RM080.filt.tagAlign.gz	UCSF-UBC.Breast_Myoepithelial_Cells.H3K4me1.RM066.filt.tagAlign.gz;UCSF-UBC.Breast_Myoepithelial_Cells.H3K4me1.RM080.filt.tagAlign.gz	UCSF-UBC.Breast_Myoepithelial_Cells.H3K36me3.RM080.filt.tagAlign.gz;UCSF-UBC.Breast_Myoepithelial_Cells.H3K36me3.RM066.filt.tagAlign.gz		UCSF-UBC.Breast_Myoepithelial_Cells.H3K9ac.RM080.filt.tagAlign.gz;UCSF-UBC.Breast_Myoepithelial_Cells.H3K9ac.RM066.filt.tagAlign.gz		E027			E027		30000000	23321153	29089725	17962840	30000000	30000000		23387974
	E054	60	Neurosph	#FFD924	BRN.GANGEM.DR.NRSPHR	1	0	1	1	0	0	0	0	Ganglion Eminence derived primary cultured neurospheres	Neurosphere_Cultured_Cells_Ganglionic_Eminence_Derived	BRAIN	PrimaryCulture	UCSF-UBC	17GW	Female	SOLID	Unknown	SD	HuFNSC02	Class 2		UCSF-UBC.Neurosphere_Cultured_Cells_Ganglionic_Eminence_Derived.Input.HuFNSC02.filt.tagAlign.gz	UCSF-UBC.Neurosphere_Cultured_Cells_Ganglionic_Eminence_Derived.H3K9me3.HuFNSC02.filt.tagAlign.gz	UCSF-UBC.Neurosphere_Cultured_Cells_Ganglionic_Eminence_Derived.H3K27me3.HuFNSC02.filt.tagAlign.gz	UCSF-UBC.Neurosphere_Cultured_Cells_Ganglionic_Eminence_Derived.H3K4me3.HuFNSC02.filt.tagAlign.gz	UCSF-UBC.Neurosphere_Cultured_Cells_Ganglionic_Eminence_Derived.H3K4me1.HuFNSC02.filt.tagAlign.gz	UCSF-UBC.Neurosphere_Cultured_Cells_Ganglionic_Eminence_Derived.H3K36me3.HuFNSC02.filt.tagAlign.gz				E054	E054		E054		21500129	21615461	30000000	18829032	30000000	30000000
	E053	61	Neurosph	#FFD924	BRN.CRTX.DR.NRSPHR	-1	0	0	0	0	0	0	0	Cortex derived primary cultured neurospheres	Neurosphere_Cultured_Cells_Cortex_Derived	BRAIN	PrimaryCulture	UCSF-UBC	17GW	Female	SOLID	Unknown	SD	HuFNSC02	Class 4		UCSF-UBC.Neurosphere_Cultured_Cells_Cortex_Derived.Input.HuFNSC02.filt.tagAlign.gz	UCSF-UBC.Neurosphere_Cultured_Cells_Cortex_Derived.H3K9me3.HuFNSC02.filt.tagAlign.gz	UCSF-UBC.Neurosphere_Cultured_Cells_Cortex_Derived.H3K27me3.HuFNSC02.filt.tagAlign.gz	UCSF-UBC.Neurosphere_Cultured_Cells_Cortex_Derived.H3K4me3.HuFNSC02.filt.tagAlign.gz	UCSF-UBC.Neurosphere_Cultured_Cells_Cortex_Derived.H3K4me1.HuFNSC02.filt.tagAlign.gz	UCSF-UBC.Neurosphere_Cultured_Cells_Cortex_Derived.H3K36me3.HuFNSC02.filt.tagAlign.gz				E053	E053		E053		20350092	15968390	30000000	17668724	30000000	30000000
	E112	62	Thymus	#DAB92E	THYM	0	1	1	0	1	0	0	0	Thymus	Thymus	THYMUS	PrimaryTissue	UCSD	3Y	Male	SOLID	Caucasian/African American	SD	STL001	Class 2		UCSD.Thymus.Input.STL001.filt.tagAlign.gz	UCSD.Thymus.H3K9me3.STL001.filt.tagAlign.gz	UCSD.Thymus.H3K27me3.STL001.filt.tagAlign.gz	UCSD.Thymus.H3K4me3.STL001.filt.tagAlign.gz	UCSD.Thymus.H3K4me1.STL001.filt.tagAlign.gz	UCSD.Thymus.H3K36me3.STL001.filt.tagAlign.gz	UCSD.Thymus.H3K27ac.STL001.filt.tagAlign.gz			E112	E112				13609638	26208477	26930743	26648758	15644994	26192104	16921101
	E093	63	Thymus	#DAB92E	THYM.FET	-1	1	0	0	1	0	0	0	Fetal Thymus	Fetal_Thymus	THYMUS	PrimaryTissue	UW	15GW	Female	SOLID	Unknown	SD	H-24644	Class 5		UW.Fetal_Thymus.Input.H-24644.Histone.DS21508.filt.tagAlign.gz	UW.Fetal_Thymus.H3K9me3.H-24644.Histone.DS22904.filt.tagAlign.gz	UW.Fetal_Thymus.H3K27me3.H-24644.Histone.DS22602.filt.tagAlign.gz	UW.Fetal_Thymus.H3K4me3.H-24644.Histone.DS21539.filt.tagAlign.gz	UW.Fetal_Thymus.H3K4me1.H-24644.Histone.DS22601.filt.tagAlign.gz	UW.Fetal_Thymus.H3K36me3.H-24644.Histone.DS22603.filt.tagAlign.gz	UW.Fetal_Thymus.H3K27ac.H-24644.Histone.DS21783.filt.tagAlign.gz		UW.Fetal_Thymus.ChromatinAccessibility.H-24259.DS19287.filt.tagAlign.gz;UW.Fetal_Thymus.ChromatinAccessibility.H-23964.DS17876.filt.tagAlign.gz;UW.Fetal_Thymus.ChromatinAccessibility.H-23833.DS17474.filt.tagAlign.gz;UW.Fetal_Thymus.ChromatinAccessibility.H-23964.DS17875.filt.tagAlign.gz;UW.Fetal_Thymus.ChromatinAccessibility.H-24078.DS18382.filt.tagAlign.gz;UW.Fetal_Thymus.ChromatinAccessibility.…						30000000	14802364	28332002	25524279	21287106	27691776	30000000		50000000
	E071	64	Brain	#C5912B	BRN.HIPP.MID	1	0	1	1	1	1	0	0	Brain Hippocampus Middle	Brain_Hippocampus_Middle	BRAIN	PrimaryTissue	BI	81Y, 73Y	Male	SOLID	Unknown	C	149;150	Class 2		BI.Brain_Hippocampus_Middle.Input.150.filt.tagAlign.gz;BI.Brain_Hippocampus_Middle.Input.149.filt.tagAlign.gz	BI.Brain_Hippocampus_Middle.H3K9me3.149.filt.tagAlign.gz;BI.Brain_Hippocampus_Middle.H3K9me3.150.filt.tagAlign.gz	BI.Brain_Hippocampus_Middle.H3K27me3.150.filt.tagAlign.gz;BI.Brain_Hippocampus_Middle.H3K27me3.149.filt.tagAlign.gz	BI.Brain_Hippocampus_Middle.H3K4me3.150.filt.tagAlign.gz;BI.Brain_Hippocampus_Middle.H3K4me3.149.filt.tagAlign.gz	BI.Brain_Hippocampus_Middle.H3K4me1.150.filt.tagAlign.gz;BI.Brain_Hippocampus_Middle.H3K4me1.149.filt.tagAlign.gz	BI.Brain_Hippocampus_Middle.H3K36me3.150.filt.tagAlign.gz;BI.Brain_Hippocampus_Middle.H3K36me3.149.filt.tagAlign.gz	BI.Brain_Hippocampus_Middle.H3K27ac.149.filt.tagAlign.gz;BI.Brain_Hippocampus_Middle.H3K27ac.150.filt.tagAlign.gz			E071	E071				30000000	30000000	30000000	30000000	30000000	30000000	30000000
	E074	65	Brain	#C5912B	BRN.SUB.NIG	1	0	1	0	1	0	0	0	Brain Substantia Nigra	Brain_Substantia_Nigra	BRAIN	PrimaryTissue	BI	75Y, 81Y	Mixed	SOLID	Unknown	C	112;149	Class 5		BI.Brain_Substantia_Nigra.Input.112.filt.tagAlign.gz;BI.Brain_Substantia_Nigra.Input.149.filt.tagAlign.gz	BI.Brain_Substantia_Nigra.H3K9me3.149.filt.tagAlign.gz;BI.Brain_Substantia_Nigra.H3K9me3.112.filt.tagAlign.gz	BI.Brain_Substantia_Nigra.H3K27me3.112.filt.tagAlign.gz;BI.Brain_Substantia_Nigra.H3K27me3.149.filt.tagAlign.gz	BI.Brain_Substantia_Nigra.H3K4me3.112.filt.tagAlign.gz;BI.Brain_Substantia_Nigra.H3K4me3.149.filt.tagAlign.gz	BI.Brain_Substantia_Nigra.H3K4me1.149.filt.tagAlign.gz;BI.Brain_Substantia_Nigra.H3K4me1.112.filt.tagAlign.gz	BI.Brain_Substantia_Nigra.H3K36me3.149.filt.tagAlign.gz;BI.Brain_Substantia_Nigra.H3K36me3.112.filt.tagAlign.gz	BI.Brain_Substantia_Nigra.H3K27ac.149.filt.tagAlign.gz;BI.Brain_Substantia_Nigra.H3K27ac.149.DNA_Lib_1847.filt.tagAlign.gz	BI.Brain_Substantia_Nigra.H3K9ac.112.filt.tagAlign.gz				E074			30000000	30000000	30000000	30000000	30000000	30000000	30000000	30000000
	E068	66	Brain	#C5912B	BRN.ANT.CAUD	1	0	1	1	1	1	0	0	Brain Anterior Caudate	Brain_Anterior_Caudate	BRAIN	PrimaryTissue	BI	75Y, 81Y	Mixed	SOLID	Unknown	C	112;149	Class 5		BI.Brain_Anterior_Caudate.Input.149.filt.tagAlign.gz;BI.Brain_Anterior_Caudate.Input.112.filt.tagAlign.gz	BI.Brain_Anterior_Caudate.H3K9me3.112.filt.tagAlign.gz;BI.Brain_Anterior_Caudate.H3K9me3.149.filt.tagAlign.gz	BI.Brain_Anterior_Caudate.H3K27me3.149.filt.tagAlign.gz;BI.Brain_Anterior_Caudate.H3K27me3.112.filt.tagAlign.gz	BI.Brain_Anterior_Caudate.H3K4me3.149.filt.tagAlign.gz;BI.Brain_Anterior_Caudate.H3K4me3.112.filt.tagAlign.gz	BI.Brain_Anterior_Caudate.H3K4me1.112.filt.tagAlign.gz;BI.Brain_Anterior_Caudate.H3K4me1.149.filt.tagAlign.gz	BI.Brain_Anterior_Caudate.H3K36me3.112.filt.tagAlign.gz;BI.Brain_Anterior_Caudate.H3K36me3.149.filt.tagAlign.gz	BI.Brain_Anterior_Caudate.H3K27ac.149.filt.tagAlign.gz;BI.Brain_Anterior_Caudate.H3K27ac.112.filt.tagAlign.gz	BI.Brain_Anterior_Caudate.H3K9ac.112.filt.tagAlign.gz				E068			30000000	30000000	30000000	30000000	30000000	30000000	30000000	28970422
	E069	67	Brain	#C5912B	BRN.CING.GYR	1	0	1	0	1	0	0	0	Brain Cingulate Gyrus	Brain_Cingulate_Gyrus	BRAIN	PrimaryTissue	BI	75Y, 81Y	Mixed	SOLID	Unknown	C	112;149	Class 5		BI.Brain_Cingulate_Gyrus.Input.112.filt.tagAlign.gz;BI.Brain_Cingulate_Gyrus.Input.149.filt.tagAlign.gz	BI.Brain_Cingulate_Gyrus.H3K9me3.149.filt.tagAlign.gz;BI.Brain_Cingulate_Gyrus.H3K9me3.112.filt.tagAlign.gz	BI.Brain_Cingulate_Gyrus.H3K27me3.149.filt.tagAlign.gz	BI.Brain_Cingulate_Gyrus.H3K4me3.149.filt.tagAlign.gz;BI.Brain_Cingulate_Gyrus.H3K4me3.112.filt.tagAlign.gz	BI.Brain_Cingulate_Gyrus.H3K4me1.149.filt.tagAlign.gz;BI.Brain_Cingulate_Gyrus.H3K4me1.112.filt.tagAlign.gz	BI.Brain_Cingulate_Gyrus.H3K36me3.149.filt.tagAlign.gz;BI.Brain_Cingulate_Gyrus.H3K36me3.112.filt.tagAlign.gz	BI.Brain_Cingulate_Gyrus.H3K27ac.149.filt.tagAlign.gz;BI.Brain_Cingulate_Gyrus.H3K27ac.112.filt.tagAlign.gz	BI.Brain_Cingulate_Gyrus.H3K9ac.112.filt.tagAlign.gz				E069			30000000	30000000	30000000	30000000	30000000	30000000	30000000	30000000
	E072	68	Brain	#C5912B	BRN.INF.TMP	1	0	1	1	1	0	0	0	Brain Inferior Temporal Lobe	Brain_Inferior_Temporal_Lobe	BRAIN	PrimaryTissue	BI	75Y, 81Y	Mixed	SOLID	Unknown	C	112;149	Class 5		BI.Brain_Inferior_Temporal_Lobe.Input.149.filt.tagAlign.gz;BI.Brain_Inferior_Temporal_Lobe.Input.112.filt.tagAlign.gz	BI.Brain_Inferior_Temporal_Lobe.H3K9me3.149.filt.tagAlign.gz;BI.Brain_Inferior_Temporal_Lobe.H3K9me3.112.filt.tagAlign.gz	BI.Brain_Inferior_Temporal_Lobe.H3K27me3.149.filt.tagAlign.gz;BI.Brain_Inferior_Temporal_Lobe.H3K27me3.112.filt.tagAlign.gz	BI.Brain_Inferior_Temporal_Lobe.H3K4me3.149.filt.tagAlign.gz;BI.Brain_Inferior_Temporal_Lobe.H3K4me3.112.filt.tagAlign.gz	BI.Brain_Inferior_Temporal_Lobe.H3K4me1.112.filt.tagAlign.gz	BI.Brain_Inferior_Temporal_Lobe.H3K36me3.149.filt.tagAlign.gz;BI.Brain_Inferior_Temporal_Lobe.H3K36me3.112.filt.tagAlign.gz	BI.Brain_Inferior_Temporal_Lobe.H3K27ac.149.filt.tagAlign.gz;BI.Brain_Inferior_Temporal_Lobe.H3K27ac.112.filt.tagAlign.gz	BI.Brain_Inferior_Temporal_Lobe.H3K9ac.112.filt.tagAlign.gz				E072			30000000	30000000	30000000	30000000	30000000	30000000	30000000	27859375
	E067	69	Brain	#C5912B	BRN.ANG.GYR	1	0	1	1	1	0	0	0	Brain Angular Gyrus	Brain_Angular_Gyrus	BRAIN	PrimaryTissue	BI	75Y, 81Y	Mixed	SOLID	Unknown	C	112;149	Class 5		BI.Brain_Angular_Gyrus.Input.149.filt.tagAlign.gz	BI.Brain_Angular_Gyrus.H3K9me3.149.filt.tagAlign.gz;BI.Brain_Angular_Gyrus.H3K9me3.112.filt.tagAlign.gz	BI.Brain_Angular_Gyrus.H3K27me3.149.filt.tagAlign.gz	BI.Brain_Angular_Gyrus.H3K4me3.149.filt.tagAlign.gz;BI.Brain_Angular_Gyrus.H3K4me3.112.filt.tagAlign.gz	BI.Brain_Angular_Gyrus.H3K4me1.112.filt.tagAlign.gz;BI.Brain_Angular_Gyrus.H3K4me1.149.filt.tagAlign.gz	BI.Brain_Angular_Gyrus.H3K36me3.112.filt.tagAlign.gz;BI.Brain_Angular_Gyrus.H3K36me3.149.filt.tagAlign.gz	BI.Brain_Angular_Gyrus.H3K27ac.149.filt.tagAlign.gz;BI.Brain_Angular_Gyrus.H3K27ac.112.filt.tagAlign.gz	BI.Brain_Angular_Gyrus.H3K9ac.112.filt.tagAlign.gz				E067			30000000	30000000	23795099	30000000	30000000	30000000	30000000	30000000
	E073	70	Brain	#C5912B	BRN.DL.PRFRNTL.CRTX	1	0	1	1	1	0	0	0	Brain_Dorsolateral_Prefrontal_Cortex	Brain_Mid_Frontal_Lobe	BRAIN	PrimaryTissue	BI	75Y, 81Y	Mixed	SOLID	Unknown	C	112;149	Class 5		BI.Brain_Mid_Frontal_Lobe.Input.149.filt.tagAlign.gz;BI.Brain_Dorsolateral_Prefrontal_Cortex.Input.112.filt.tagAlign.gz	BI.Brain_Mid_Frontal_Lobe.H3K9me3.112.filt.tagAlign.gz;BI.Brain_Dorsolateral_Prefrontal_Cortex.H3K9me3.149.filt.tagAlign.gz	BI.Brain_Mid_Frontal_Lobe.H3K27me3.149.filt.tagAlign.gz	BI.Brain_Mid_Frontal_Lobe.H3K4me3.112.filt.tagAlign.gz;BI.Brain_Dorsolateral_Prefrontal_Cortex.H3K4me3.149.filt.tagAlign.gz	BI.Brain_Mid_Frontal_Lobe.H3K4me1.149.filt.tagAlign.gz;BI.Brain_Dorsolateral_Prefrontal_Cortex.H3K4me1.112.filt.tagAlign.gz	BI.Brain_Mid_Frontal_Lobe.H3K36me3.149.filt.tagAlign.gz;BI.Brain_Dorsolateral_Prefrontal_Cortex.H3K36me3.112.filt.tagAlign.gz	BI.Brain_Dorsolateral_Prefrontal_Cortex.H3K27ac.112.filt.tagAlign.gz;BI.Brain_Dorsolateral_Prefrontal_Cortex.H3K27ac.149.filt.tagAlign.gz	BI.Brain_Dorsolateral_Prefrontal_Cortex.H3K9ac.112.filt.tagAlign.gz				E073			30000000	30000000	25005527	30000000	30000000	30000000	30000000	30000000
	E070	71	Brain	#C5912B	BRN.GRM.MTRX	-1	0	0	0	0	0	0	0	Brain Germinal Matrix	Brain_Germinal_Matrix	BRAIN	PrimaryTissue	UCSF-UBC	20GW	Male	SOLID	Unknown	SD	HuFGM02	Class 2		UCSF-UBC.Brain_Germinal_Matrix.Input.HuFGM02.filt.tagAlign.gz	UCSF-UBC.Brain_Germinal_Matrix.H3K9me3.HuFGM02.filt.tagAlign.gz	UCSF-UBC.Brain_Germinal_Matrix.H3K27me3.HuFGM02.filt.tagAlign.gz	UCSF-UBC.Brain_Germinal_Matrix.H3K4me3.HuFGM02.filt.tagAlign.gz	UCSF-UBC.Brain_Germinal_Matrix.H3K4me1.HuFGM02.filt.tagAlign.gz	UCSF-UBC.Brain_Germinal_Matrix.H3K36me3.HuFGM02.filt.tagAlign.gz				E070	E070				13500539	11098064	15831098	20093552	23639036	20583742
	E082	72	Brain	#C5912B	BRN.FET.F	1	-1	0	0	0	0	0	0	Fetal Brain Female	Fetal_Brain_Female	BRAIN	PrimaryTissue	UCSF-UBC	17GW. 17GW	Female	SOLID	Unknown	C	HuFNSC01;HuFNSC02	Class 4		UCSF-UBC.Fetal_Brain.Input.HuFNSC02.filt.tagAlign.gz;UCSF-UBC.Fetal_Brain.Input.HuFNSC01.filt.tagAlign.gz	UCSF-UBC.Fetal_Brain.H3K9me3.HuFNSC02.filt.tagAlign.gz;UCSF-UBC.Fetal_Brain.H3K9me3.HuFNSC01.filt.tagAlign.gz	UCSF-UBC.Fetal_Brain.H3K27me3.HuFNSC02.filt.tagAlign.gz;UCSF-UBC.Fetal_Brain.H3K27me3.HuFNSC01.filt.tagAlign.gz	UCSF-UBC.Fetal_Brain.H3K4me3.HuFNSC01.filt.tagAlign.gz;UCSF-UBC.Fetal_Brain.H3K4me3.HuFNSC02.filt.tagAlign.gz	UCSF-UBC.Fetal_Brain.H3K4me1.HuFNSC02.filt.tagAlign.gz;UCSF-UBC.Fetal_Brain.H3K4me1.HuFNSC01.filt.tagAlign.gz	UCSF-UBC.Fetal_Brain.H3K36me3.HuFNSC01.filt.tagAlign.gz;UCSF-UBC.Fetal_Brain.H3K36me3.HuFNSC02.filt.tagAlign.gz			UW.Fetal_Brain.ChromatinAccessibility.H-22911.DS14464.filt.tagAlign.gz	E082			E082		28368823	30000000	30000000	30000000	30000000	30000000			26680226
	E081	73	Brain	#C5912B	BRN.FET.M	0	-1	0	0	0	0	0	0	Fetal Brain Male	Fetal_Brain_Male	BRAIN	PrimaryTissue	BI	17GW, 17GW	Male/Unknown	SOLID	Unknown	C	H-22510;UW_H22676	Class 3		BI.Fetal_Brain.Input.UW_H22676.filt.tagAlign.gz	BI.Fetal_Brain.H3K9me3.UW_H-22510.filt.tagAlign.gz;BI.Fetal_Brain.H3K9me3.UW_H22676.filt.tagAlign.gz	BI.Fetal_Brain.H3K27me3.UW_H-22510.filt.tagAlign.gz;BI.Fetal_Brain.H3K27me3.UW_H22676.filt.tagAlign.gz	BI.Fetal_Brain.H3K4me3.UW_H-22510.filt.tagAlign.gz	BI.Fetal_Brain.H3K4me1.UW_H22676.filt.tagAlign.gz	BI.Fetal_Brain.H3K36me3.UW_H-22510.filt.tagAlign.gz			UW.Fetal_Brain.ChromatinAccessibility.H-22510.DS11872.filt.tagAlign.gz;UW.Fetal_Brain.ChromatinAccessibility.H-22510.DS11877.filt.tagAlign.gz			E081	E081		15986718	30000000	30000000	27040862	16684621	27976521			50000000
	E063	74	Adipose	#AF5B39	FAT.ADIP.NUC	1	0	1	1	1	1	0	0	Adipose Nuclei	Adipose_Nuclei	FAT	PrimaryTissue	BI	49Y, 59Y, 41Y, 25Y, 81Y	Female	SOLID	Unknown	C	7;92;93;94;95	Class 5		BI.Adipose_Nuclei.Input.94.filt.tagAlign.gz;BI.Adipose_Nuclei.Input.92.filt.tagAlign.gz;BI.Adipose_Nuclei.Input.93.filt.tagAlign.gz;BI.Adipose_Nuclei.Input.7.filt.tagAlign.gz;BI.Adipose_Nuclei.Input.95.filt.tagAlign.gz	BI.Adipose_Nuclei.H3K9me3.95.filt.tagAlign.gz;BI.Adipose_Nuclei.H3K9me3.93.filt.tagAlign.gz;BI.Adipose_Nuclei.H3K9me3.92.filt.tagAlign.gz;BI.Adipose_Nuclei.H3K9me3.94.filt.tagAlign.gz;BI.Adipose_Nuclei.H3K9me3.7.filt.tagAlign.gz	BI.Adipose_Nuclei.H3K27me3.92.filt.tagAlign.gz;BI.Adipose_Nuclei.H3K27me3.7.filt.tagAlign.gz;BI.Adipose_Nuclei.H3K27me3.95.filt.tagAlign.gz;BI.Adipose_Nuclei.H3K27me3.94.filt.tagAlign.gz;BI.Adipose_Nuclei.H3K27me3.93.filt.tagAlign.gz	BI.Adipose_Nuclei.H3K4me3.92.filt.tagAlign.gz;BI.Adipose_Nuclei.H3K4me3.95.filt.tagAlign.gz;BI.Adipose_Nuclei.H3K4me3.7.filt.tagAlign.gz;BI.Adipose_Nuclei.H3K4me3.93.filt.tagAlign.gz;BI.Adipose_Nuclei.H3K4me3.94.filt.tagAlign.gz	BI.Adipose_Nuclei.H3K4me1.93.filt.tagAlign.gz;BI.Adipose_Nuclei.H3K4me1.95.filt.tagAlign.gz;BI.Adipose_Nuclei.H3K4me1.7.filt.tagAlign.gz;BI.Adipose_Nuclei.H3K4me1.92.filt.tagAlign.gz;BI.Adipose_Nuclei.H3K4me1.94.filt.tagAlign.gz	BI.Adipose_Nuclei.H3K36me3.7.filt.tagAlign.gz;BI.Adipose_Nuclei.H3K36me3.93.filt.tagAlign.gz;BI.Adipose_Nuclei.H3K36me3.94.filt.tagAlign.gz;BI.Adipose_Nuclei.H3K36me3.95.filt.tagAlign.gz;BI.Adipose_Nuclei.H3K36me3.92.filt.tagAlign.gz	BI.Adipose_Nuclei.H3K27ac.7.filt.tagAlign.gz	BI.Adipose_Nuclei.H3K9ac.92.filt.tagAlign.gz;BI.Adipose_Nuclei.H3K9ac.93.filt.tagAlign.gz;BI.Adipose_Nuclei.H3K9ac.94.filt.tagAlign.gz;BI.Adipose_Nuclei.H3K9ac.7.filt.tagAlign.gz;BI.Adipose_Nuclei.H3K9ac.95.filt.tagAlign.gz							30000000	30000000	30000000	30000000	30000000	30000000	16568068	30000000
	E100	75	Muscle	#C2655D	MUS.PSOAS	-1	1	0	0	1	0	0	0	Psoas Muscle	Psoas_Muscle	MUSCLE	PrimaryTissue	UCSD	3Y, 34Y	Male	SOLID	Caucasian/African American, Caucasian	C	STL001;STL003	Class 2		UCSD.Psoas_Muscle.Input.STL001.filt.tagAlign.gz;UCSD.Psoas_Muscle.Input.STL003.filt.tagAlign.gz	UCSD.Psoas_Muscle.H3K9me3.STL001.filt.tagAlign.gz	UCSD.Psoas_Muscle.H3K27me3.STL003.filt.tagAlign.gz	UCSD.Psoas_Muscle.H3K4me3.STL003.filt.tagAlign.gz;UCSD.Psoas_Muscle.H3K4me3.STL001.filt.tagAlign.gz	UCSD.Psoas_Muscle.H3K4me1.STL003.filt.tagAlign.gz;UCSD.Psoas_Muscle.H3K4me1.STL001.filt.tagAlign.gz	UCSD.Psoas_Muscle.H3K36me3.STL001.filt.tagAlign.gz	UCSD.Psoas_Muscle.H3K27ac.STL003.filt.tagAlign.gz;UCSD.Psoas_Muscle.H3K27ac.STL001.filt.tagAlign.gz		UW.Psoas_Muscle.ChromatinAccessibility.STL001.DNase.DS20325.filt.tagAlign.gz	E100	E100				30000000	24435553	8837740	30000000	26803294	18935078	15780458		40950995
	E108	76	Muscle	#C2655D	MUS.SKLT.F	1	0	1	0	1	0	0	0	Skeletal Muscle Female	Skeletal_Muscle_Female	MUSCLE	PrimaryTissue	BI	72Y	Female	SOLID	Caucasian	SD	62	Class 4		BI.Skeletal_Muscle.Input.62.filt.tagAlign.gz	BI.Skeletal_Muscle.H3K9me3.62.filt.tagAlign.gz	BI.Skeletal_Muscle.H3K27me3.62.filt.tagAlign.gz	BI.Skeletal_Muscle.H3K4me3.62.filt.tagAlign.gz	BI.Skeletal_Muscle.H3K4me1.62.filt.tagAlign.gz	BI.Skeletal_Muscle.H3K36me3.62.filt.tagAlign.gz	BI.Skeletal_Muscle.H3K27ac.62.filt.tagAlign.gz	BI.Skeletal_Muscle.H3K9ac.62.filt.tagAlign.gz				E108			30000000	27308448	29558349	27458610	29822180	29821919	18923998	18468249
	E107	77	Muscle	#C2655D	MUS.SKLT.M	1	0	1	0	0	0	0	0	Skeletal Muscle Male	Skeletal_Muscle_Male	MUSCLE	PrimaryTissue	BI	54Y	Male	SOLID	Caucasian	SD	63	Class 4		BI.Skeletal_Muscle.Input.63.filt.tagAlign.gz	BI.Skeletal_Muscle.H3K9me3.63.filt.tagAlign.gz	BI.Skeletal_Muscle.H3K27me3.63.filt.tagAlign.gz	BI.Skeletal_Muscle.H3K4me3.63.filt.tagAlign.gz	BI.Skeletal_Muscle.H3K4me1.63.filt.tagAlign.gz	BI.Skeletal_Muscle.H3K36me3.63.filt.tagAlign.gz		BI.Skeletal_Muscle.H3K9ac.63.filt.tagAlign.gz				E107			26846263	26170023	28560240	27898894	26941724	28968736		24165192
	E089	78	Muscle	#C2655D	MUS.TRNK.FET	-1	1	0	0	1	0	0	0	Fetal Muscle Trunk	Fetal_Muscle_Trunk	MUSCLE	PrimaryTissue	UW	16GW	Female	SOLID	Unknown	SD	H-24851	Class 5		UW.Fetal_Muscle_Trunk.Input.H-24854.Histone.DS23031.filt.tagAlign.gz	UW.Fetal_Muscle_Trunk.H3K9me3.H-24851.Histone.DS23309.filt.tagAlign.gz	UW.Fetal_Muscle_Trunk.H3K27me3.H-24851.Histone.DS23036.filt.tagAlign.gz	UW.Fetal_Muscle_Trunk.H3K4me3.H-24851.Histone.DS23302.filt.tagAlign.gz	UW.Fetal_Muscle_Trunk.H3K4me1.H-24851.Histone.DS23308.filt.tagAlign.gz	UW.Fetal_Muscle_Trunk.H3K36me3.H-24851.Histone.DS23037.filt.tagAlign.gz	UW.Fetal_Muscle_Trunk.H3K27ac.H-24851.Histone.DS23303.filt.tagAlign.gz		UW.Fetal_Muscle_Trunk.ChromatinAccessibility.H-24409.DS20242.filt.tagAlign.gz;UW.Fetal_Muscle_Trunk.ChromatinAccessibility.H-23941.DS17827.filt.tagAlign.gz;UW.Fetal_Muscle_Trunk.ChromatinAccessibility.H-24507.DS20544.filt.tagAlign.gz						18197787	19336164	19159641	30000000	17656092	30000000	17469992		50000000
	E090	79	Muscle	#C2655D	MUS.LEG.FET	0	1	1	1	1	1	0	0	Fetal Muscle Leg	Fetal_Muscle_Leg	MUSCLE_LEG	PrimaryTissue	UW	15GW	Female	SOLID	Unknown	SD	H-24644	Class 5		UW.Fetal_Muscle_Leg.Input.H-24644.Histone.DS21509.filt.tagAlign.gz	UW.Fetal_Muscle_Leg.H3K9me3.H-24644.Histone.DS22903.filt.tagAlign.gz	UW.Fetal_Muscle_Leg.H3K27me3.H-24644.Histone.DS22559.filt.tagAlign.gz	UW.Fetal_Muscle_Leg.H3K4me3.H-24644.Histone.DS21536.filt.tagAlign.gz	UW.Fetal_Muscle_Leg.H3K4me1.H-24644.Histone.DS22558.filt.tagAlign.gz	UW.Fetal_Muscle_Leg.H3K36me3.H-24644.Histone.DS22560.filt.tagAlign.gz	UW.Fetal_Muscle_Leg.H3K27ac.H-24644.Histone.DS21782.filt.tagAlign.gz		UW.Fetal_Muscle_Leg.ChromatinAccessibility.H-23808.DS17429.filt.tagAlign.gz;UW.Fetal_Muscle_Leg.ChromatinAccessibility.H-24143.DS18844.filt.tagAlign.gz;UW.Fetal_Muscle_Leg.ChromatinAccessibility.H-24089.DS18456.filt.tagAlign.gz;UW.Fetal_Muscle_Leg.ChromatinAccessibility.H-24409.DS20239.filt.tagAlign.gz;UW.Fetal_Muscle_Leg.ChromatinAccessibility.H-24078.DS18386.filt.tagAlign.gz;UW.Fetal_Muscle_Leg…						23415690	25759731	22108954	29834349	30000000	30000000	26085199		50000000
	E083	80	Heart	#D56F80	HRT.FET	-1	-1	0	0	0	0	0	0	Fetal Heart	Fetal_Heart	HEART	PrimaryTissue	BI	14GW, 15GW, 13GW	Mixed	SOLID	Unknown	C	H-22727;H-23524;UW_H23914	Class 3		BI.Fetal_Heart.Input.UW_H-22727.filt.tagAlign.gz;BI.Fetal_Heart.Input.H-23468.filt.tagAlign.gz	BI.Fetal_Heart.H3K9me3.UW_H-22727.filt.tagAlign.gz	BI.Fetal_Heart.H3K27me3.UW_H-22727.filt.tagAlign.gz	BI.Fetal_Heart.H3K4me3.UW_H23914.filt.tagAlign.gz	BI.Fetal_Heart.H3K4me1.H-23524.filt.tagAlign.gz;BI.Fetal_Heart.H3K4me1.UW_H23914.filt.tagAlign.gz	BI.Fetal_Heart.H3K36me3.UW_H-22727.filt.tagAlign.gz		BI.Fetal_Heart.H3K9ac.H-23524.filt.tagAlign.gz	UW.Fetal_Heart.ChromatinAccessibility.H-23468.DS15839.filt.tagAlign.gz;UW.Fetal_Heart.ChromatinAccessibility.H-22727.DS12810.filt.tagAlign.gz;UW.Fetal_Heart.ChromatinAccessibility.H-23524.DS16146.filt.tagAlign.gz			E083			21203977	17982142	21485738	13971404	30000000	18207403		15704109	50000000
Likely antibody issue with H3K36me3. Use this sample with extreme caution especially any chromatin states associated with H3K36me3	E104	81	Heart	#D56F80	HRT.ATR.R	-1	1	0	0	1	0	0	0	Right Atrium	Right_Atrium	HEART	PrimaryTissue	UCSD	34Y	Male	SOLID	Caucasian	SD	STL003	Class 2		UCSD.Right_Atrium.Input.STL003.filt.tagAlign.gz	UCSD.Right_Atrium.H3K9me3.STL003.filt.tagAlign.gz	UCSD.Right_Atrium.H3K27me3.STL003.filt.tagAlign.gz	UCSD.Right_Atrium.H3K4me3.STL003.filt.tagAlign.gz	UCSD.Right_Atrium.H3K4me1.STL003.filt.tagAlign.gz	UCSD.Right_Atrium.H3K36me3.STL003.filt.tagAlign.gz	UCSD.Right_Atrium.H3K27ac.STL003.filt.tagAlign.gz			E104	E104				21667490	30000000	26426254	24225024	17828160	8084109	24618650
	E095	82	Heart	#D56F80	HRT.VENT.L	1	1	1	0	1	0	0	0	Left Ventricle	Left_Ventricle	HEART	PrimaryTissue	UCSD	3Y, 34Y	Male	SOLID	Caucasian/African American, Caucasian	C	STL001;STL003	Class 2		UCSD.Left_Ventricle.Input.STL003.filt.tagAlign.gz;UCSD.Left_Ventricle.Input.STL001.filt.tagAlign.gz	UCSD.Left_Ventricle.H3K9me3.STL001.filt.tagAlign.gz;UCSD.Left_Ventricle.H3K9me3.STL003.filt.tagAlign.gz	UCSD.Left_Ventricle.H3K27me3.STL003.filt.tagAlign.gz;UCSD.Left_Ventricle.H3K27me3.STL001.filt.tagAlign.gz	UCSD.Left_Ventricle.H3K4me3.STL003.filt.tagAlign.gz;UCSD.Left_Ventricle.H3K4me3.STL001.filt.tagAlign.gz	UCSD.Left_Ventricle.H3K4me1.STL003.filt.tagAlign.gz;UCSD.Left_Ventricle.H3K4me1.STL001.filt.tagAlign.gz	UCSD.Left_Ventricle.H3K36me3.STL003.filt.tagAlign.gz;UCSD.Left_Ventricle.H3K36me3.STL001.filt.tagAlign.gz	UCSD.Left_Ventricle.H3K27ac.STL003.filt.tagAlign.gz;UCSD.Left_Ventricle.H3K27ac.STL001.filt.tagAlign.gz			E095	E095				30000000	18215079	30000000	29961373	30000000	30000000	30000000
	E105	83	Heart	#D56F80	HRT.VNT.R	-1	1	0	0	1	0	0	0	Right Ventricle	Right_Ventricle	HEART	PrimaryTissue	UCSD	3Y, 34Y	Male	SOLID	Caucasian/African American, Caucasian	C	STL001;STL003	Class 2		UCSD.Right_Ventricle.Input.STL003.filt.tagAlign.gz;UCSD.Right_Ventricle.Input.STL001.filt.tagAlign.gz	UCSD.Right_Ventricle.H3K9me3.STL001.filt.tagAlign.gz	UCSD.Right_Ventricle.H3K27me3.STL001.filt.tagAlign.gz	UCSD.Right_Ventricle.H3K4me3.STL001.filt.tagAlign.gz	UCSD.Right_Ventricle.H3K4me1.STL003.filt.tagAlign.gz;UCSD.Right_Ventricle.H3K4me1.STL001.filt.tagAlign.gz	UCSD.Right_Ventricle.H3K36me3.STL003.filt.tagAlign.gz;UCSD.Right_Ventricle.H3K36me3.STL001.filt.tagAlign.gz	UCSD.Right_Ventricle.H3K27ac.STL001.filt.tagAlign.gz			E105	E105				30000000	30000000	23238486	9425366	30000000	22390897	10326840
	E065	84	Heart	#D56F80	VAS.AOR	1	1	1	0	1	0	0	0	Aorta	Aorta	VASCULAR	PrimaryTissue	UCSD	34Y	Male	SOLID	Caucasian	SD	STL003	Class 2		UCSD.Aorta.Input.STL003.filt.tagAlign.gz	UCSD.Aorta.H3K9me3.STL003.filt.tagAlign.gz	UCSD.Aorta.H3K27me3.STL003.filt.tagAlign.gz	UCSD.Aorta.H3K4me3.STL003.filt.tagAlign.gz	UCSD.Aorta.H3K4me1.STL003.filt.tagAlign.gz	UCSD.Aorta.H3K36me3.STL003.filt.tagAlign.gz	UCSD.Aorta.H3K27ac.STL003.filt.tagAlign.gz			E065	E065				16628788	27455320	15468868	21785763	16240982	28146127	21179493
	E078	85	Sm. Muscle	#F182BC	GI.DUO.SM.MUS	1	0	1	1	1	0	0	0	Duodenum Smooth Muscle	Duodenum_Smooth_Muscle	GI_DUODENUM	PrimaryTissue	BI	59Y, 73Y	Male	SOLID	Caucasian	C	160;174_REMC_28	Class 5		BI.Duodenum_Smooth_Muscle.Input.160.filt.tagAlign.gz;BI.Duodenum_Smooth_Muscle.Input.Donor_174_REMC_28.filt.tagAlign.gz	BI.Duodenum_Smooth_Muscle.H3K9me3.Donor_174_REMC_28.filt.tagAlign.gz;BI.Duodenum_Smooth_Muscle.H3K9me3.160.filt.tagAlign.gz	BI.Duodenum_Smooth_Muscle.H3K27me3.Donor_174_REMC_28.filt.tagAlign.gz;BI.Duodenum_Smooth_Muscle.H3K27me3.160.filt.tagAlign.gz	BI.Duodenum_Smooth_Muscle.H3K4me3.160.filt.tagAlign.gz;BI.Duodenum_Smooth_Muscle.H3K4me3.Donor_174_REMC_28.filt.tagAlign.gz	BI.Duodenum_Smooth_Muscle.H3K4me1.Donor_174_REMC_28.filt.tagAlign.gz;BI.Duodenum_Smooth_Muscle.H3K4me1.160.filt.tagAlign.gz	BI.Duodenum_Smooth_Muscle.H3K36me3.Donor_174_REMC_28.filt.tagAlign.gz;BI.Duodenum_Smooth_Muscle.H3K36me3.160.filt.tagAlign.gz	BI.Duodenum_Smooth_Muscle.H3K27ac.160.filt.tagAlign.gz								30000000	30000000	30000000	30000000	30000000	30000000	30000000
	E076	86	Sm. Muscle	#F182BC	GI.CLN.SM.MUS	1	-1	0	0	1	0	0	0	Colon Smooth Muscle	Colon_Smooth_Muscle	GI_COLON	PrimaryTissue	BI	56Y, 77Y	Female	SOLID	Caucasian	C	156;83_REMC_18	Class 5		BI.Colon_Smooth_Muscle.Input.156.filt.tagAlign.gz;BI.Colon_Smooth_Muscle.Input.Donor_83_REMC_18.filt.tagAlign.gz	BI.Colon_Smooth_Muscle.H3K9me3.Donor_83_REMC_18.filt.tagAlign.gz;BI.Colon_Smooth_Muscle.H3K9me3.156.filt.tagAlign.gz	BI.Colon_Smooth_Muscle.H3K27me3.156.filt.tagAlign.gz;BI.Colon_Smooth_Muscle.H3K27me3.Donor_83_REMC_18.filt.tagAlign.gz	BI.Colon_Smooth_Muscle.H3K4me3.Donor_83_REMC_18.filt.tagAlign.gz;BI.Colon_Smooth_Muscle.H3K4me3.156.filt.tagAlign.gz	BI.Colon_Smooth_Muscle.H3K4me1.Donor_83_REMC_18.filt.tagAlign.gz	BI.Colon_Smooth_Muscle.H3K36me3.156.DNA_Lib_1851.filt.tagAlign.gz;BI.Colon_Smooth_Muscle.H3K36me3.156.filt.tagAlign.gz;BI.Colon_Smooth_Muscle.H3K36me3.Donor_83_REMC_18.filt.tagAlign.gz	BI.Colon_Smooth_Muscle.H3K27ac.156.filt.tagAlign.gz	BI.Colon_Smooth_Muscle.H3K9ac.Donor_83_REMC_18.filt.tagAlign.gz				E076			30000000	30000000	30000000	30000000	30000000	30000000	13712553	29463125
	E103	87	Sm. Muscle	#F182BC	GI.RECT.SM.MUS	0	0	1	1	1	1	0	0	Rectal Smooth Muscle	Rectal_Smooth_Muscle	GI_RECTUM	PrimaryTissue	BI	50Y	Female	SOLID	Caucasian	SD	30	Class 5		BI.Rectal_Smooth_Muscle.Input.30.filt.tagAlign.gz	BI.Rectal_Smooth_Muscle.H3K9me3.30.filt.tagAlign.gz	BI.Rectal_Smooth_Muscle.H3K27me3.30.filt.tagAlign.gz	BI.Rectal_Smooth_Muscle.H3K4me3.30.filt.tagAlign.gz	BI.Rectal_Smooth_Muscle.H3K4me1.30.filt.tagAlign.gz	BI.Rectal_Smooth_Muscle.H3K36me3.30.filt.tagAlign.gz	BI.Rectal_Smooth_Muscle.H3K27ac.30.filt.tagAlign.gz	BI.Rectal_Smooth_Muscle.H3K9ac.30.filt.tagAlign.gz				E103			26466701	17983778	23089621	25364063	30000000	25482942	18644022	22689804
	E111	88	Sm. Muscle	#F182BC	GI.STMC.MUS	0	0	1	1	1	1	0	0	Stomach Smooth Muscle	Stomach_Smooth_Muscle	GI_STOMACH	PrimaryTissue	BI	84Y	Female	SOLID	Caucasian	SD	28	Class 4		BI.Stomach_Smooth_Muscle.Input.28.filt.tagAlign.gz	BI.Stomach_Smooth_Muscle.H3K9me3.28.filt.tagAlign.gz	BI.Stomach_Smooth_Muscle.H3K27me3.28.filt.tagAlign.gz	BI.Stomach_Smooth_Muscle.H3K4me3.28.filt.tagAlign.gz	BI.Stomach_Smooth_Muscle.H3K4me1.28.filt.tagAlign.gz	BI.Stomach_Smooth_Muscle.H3K36me3.28.filt.tagAlign.gz	BI.Stomach_Smooth_Muscle.H3K27ac.28.filt.tagAlign.gz	BI.Stomach_Smooth_Muscle.H3K9ac.28.filt.tagAlign.gz				E111			23248973	23606699	24316981	21806748	13548731	24021908	22192107	30000000
	E092	89	Digestive	#C58DAA	GI.STMC.FET	0	1	1	0	1	0	0	0	Fetal Stomach	Fetal_Stomach	GI_STOMACH	PrimaryTissue	UW		Female	SOLID		C	H-24639;H-24683;H-24754;H-24776	Class 5		UW.Fetal_Stomach.Input.H-24639.Histone.DS22596.filt.tagAlign.gz	UW.Fetal_Stomach.H3K9me3.H-24754.Histone.DS22928.filt.tagAlign.gz	UW.Fetal_Stomach.H3K27me3.H-24776.Histone.DS22599.filt.tagAlign.gz	UW.Fetal_Stomach.H3K4me3.H-24639.Histone.DS22598.filt.tagAlign.gz	UW.Fetal_Stomach.H3K4me1.H-24776.Histone.DS22597.filt.tagAlign.gz	UW.Fetal_Stomach.H3K36me3.H-24639.Histone.DS22600.filt.tagAlign.gz	UW.Fetal_Stomach.H3K27ac.H-24683.Histone.DS22929.filt.tagAlign.gz		UW.Fetal_Stomach.ChromatinAccessibility.H-24005.DS17963.filt.tagAlign.gz;UW.Fetal_Stomach.ChromatinAccessibility.H-24401.DS20349.filt.tagAlign.gz;UW.Fetal_Stomach.ChromatinAccessibility.H-23769.DS17325.filt.tagAlign.gz;UW.Fetal_Stomach.ChromatinAccessibility.H-23964.DS17878.filt.tagAlign.gz;UW.Fetal_Stomach.ChromatinAccessibility.H-24078.DS18389.filt.tagAlign.gz;UW.Fetal_Stomach.ChromatinAccessib…						29322147	16402941	21309182	27873393	26642071	30000000	30000000		50000000
	E085	90	Digestive	#C58DAA	GI.S.INT.FET	0	1	1	1	1	1	0	0	Fetal Intestine Small	Fetal_Intestine_Small	GI_INTESTINE	PrimaryTissue	UW	15GW	Male	SOLID	Unknown	SD	H-24595	Class 2		UW.Fetal_Intestine_Small.Input.H-24595.Histone.DS21507.filt.tagAlign.gz	UW.Fetal_Intestine_Small.H3K9me3.H-24595.Histone.DS22902.filt.tagAlign.gz	UW.Fetal_Intestine_Small.H3K27me3.H-24595.Histone.DS22556.filt.tagAlign.gz	UW.Fetal_Intestine_Small.H3K4me3.H-24595.Histone.DS21533.filt.tagAlign.gz	UW.Fetal_Intestine_Small.H3K4me1.H-24595.Histone.DS22555.filt.tagAlign.gz	UW.Fetal_Intestine_Small.H3K36me3.H-24595.Histone.DS22557.filt.tagAlign.gz	UW.Fetal_Intestine_Small.H3K27ac.H-24595.Histone.DS21781.filt.tagAlign.gz		UW.Fetal_Intestine_Small.ChromatinAccessibility.H-23769.DS17317.filt.tagAlign.gz	E085	E085				30000000	23116257	21167043	26466933	28388130	30000000	29678351		25353195
	E084	91	Digestive	#C58DAA	GI.L.INT.FET	0	1	1	0	1	0	0	0	Fetal Intestine Large	Fetal_Intestine_Large	GI_INTESTINE	PrimaryTissue	UW	15GW	Male	SOLID	Unknown	SD	H-24595	Class 2		UW.Fetal_Intestine_Large.Input.H-24595.Histone.DS21506.filt.tagAlign.gz	UW.Fetal_Intestine_Large.H3K9me3.H-24595.Histone.DS22901.filt.tagAlign.gz	UW.Fetal_Intestine_Large.H3K27me3.H-24595.Histone.DS22553.filt.tagAlign.gz;UW.Fetal_Intestine_Large.H3K27me3.H-24595.Histone.DS23306.filt.tagAlign.gz	UW.Fetal_Intestine_Large.H3K4me3.H-24595.Histone.DS21530.filt.tagAlign.gz	UW.Fetal_Intestine_Large.H3K4me1.H-24595.Histone.DS22552.filt.tagAlign.gz	UW.Fetal_Intestine_Large.H3K36me3.H-24595.Histone.DS23307.filt.tagAlign.gz;UW.Fetal_Intestine_Large.H3K36me3.H-24595.Histone.DS22554.filt.tagAlign.gz	UW.Fetal_Intestine_Large.H3K27ac.H-24595.Histone.DS21780.filt.tagAlign.gz		UW.Fetal_Intestine_Large.ChromatinAccessibility.H-23769.DS17313.filt.tagAlign.gz	E084	E084				30000000	16222704	30000000	20631600	26696288	30000000	28573947		28689628
	E109	92	Digestive	#C58DAA	GI.S.INT	-1	1	0	0	1	0	0	0	Small Intestine	Small_Intestine	GI_INTESTINE	PrimaryTissue	UCSD	3Y, 34Y	Male	SOLID	Caucasian/African American, Caucasian	C	STL001;STL003	Class 2		UCSD.Small_Intestine.Input.STL001.filt.tagAlign.gz	UCSD.Small_Intestine.H3K9me3.STL001.filt.tagAlign.gz	UCSD.Small_Intestine.H3K27me3.STL001.filt.tagAlign.gz	UCSD.Small_Intestine.H3K4me3.STL003.filt.tagAlign.gz	UCSD.Small_Intestine.H3K4me1.STL001.filt.tagAlign.gz	UCSD.Small_Intestine.H3K36me3.STL001.filt.tagAlign.gz	UCSD.Small_Intestine.H3K27ac.STL001.filt.tagAlign.gz		UW.Small_Intestine.ChromatinAccessibility.STL003.DNase.DS20770.filt.tagAlign.gz	E109	E109				30000000	8151498	29634927	10595509	17317783	8439760	30000000		45831607
	E106	93	Digestive	#C58DAA	GI.CLN.SIG	1	1	1	0	1	0	0	0	Sigmoid Colon	Sigmoid_Colon	GI_COLON	PrimaryTissue	UCSD	3Y, 34Y	Male	SOLID	Caucasian/African American, Caucasian	C	STL001;STL003	Class 2		UCSD.Sigmoid_Colon.Input.STL001.filt.tagAlign.gz;UCSD.Sigmoid_Colon.Input.STL003.filt.tagAlign.gz	UCSD.Sigmoid_Colon.H3K9me3.STL003.filt.tagAlign.gz;UCSD.Sigmoid_Colon.H3K9me3.STL001.filt.tagAlign.gz	UCSD.Sigmoid_Colon.H3K27me3.STL001.filt.tagAlign.gz;UCSD.Sigmoid_Colon.H3K27me3.STL003.filt.tagAlign.gz	UCSD.Sigmoid_Colon.H3K4me3.STL001.filt.tagAlign.gz	UCSD.Sigmoid_Colon.H3K4me1.STL003.filt.tagAlign.gz;UCSD.Sigmoid_Colon.H3K4me1.STL001.filt.tagAlign.gz	UCSD.Sigmoid_Colon.H3K36me3.STL001.filt.tagAlign.gz;UCSD.Sigmoid_Colon.H3K36me3.STL003.filt.tagAlign.gz	UCSD.Sigmoid_Colon.H3K27ac.STL003.filt.tagAlign.gz;UCSD.Sigmoid_Colon.H3K27ac.STL001.filt.tagAlign.gz			E106	E106				30000000	30000000	30000000	15535345	30000000	30000000	30000000
	E075	94	Digestive	#C58DAA	GI.CLN.MUC	-1	0	0	1	1	1	0	0	Colonic Mucosa	Colonic_Mucosa	GI_COLON	PrimaryTissue	BI	73Y	Female	SOLID	Caucasian	SD	32	Class 4		BI.Colonic_Mucosa.Input.32.filt.tagAlign.gz	BI.Colonic_Mucosa.H3K9me3.32.filt.tagAlign.gz	BI.Colonic_Mucosa.H3K27me3.32.filt.tagAlign.gz	BI.Colonic_Mucosa.H3K4me3.32.filt.tagAlign.gz	BI.Colonic_Mucosa.H3K4me1.32.filt.tagAlign.gz	BI.Colonic_Mucosa.H3K36me3.32.filt.tagAlign.gz	BI.Colonic_Mucosa.H3K27ac.32.filt.tagAlign.gz	BI.Colonic_Mucosa.H3K9ac.32.filt.tagAlign.gz				E075			17597438	11472457	11917259	12171088	12035520	13166426	16157458	11223367
	E101	95	Digestive	#C58DAA	GI.RECT.MUC.29	1	0	1	0	1	0	0	0	Rectal Mucosa Donor 29	Rectal_Mucosa.Donor_29	GI_RECTUM	PrimaryTissue	BI	50Y	Female	SOLID	Caucasian	SD	29	Class 4		BI.Rectal_Mucosa.Input.29.filt.tagAlign.gz	BI.Rectal_Mucosa.H3K9me3.29.filt.tagAlign.gz	BI.Rectal_Mucosa.H3K27me3.29.filt.tagAlign.gz	BI.Rectal_Mucosa.H3K4me3.29.filt.tagAlign.gz	BI.Rectal_Mucosa.H3K4me1.29.filt.tagAlign.gz	BI.Rectal_Mucosa.H3K36me3.29.filt.tagAlign.gz	BI.Rectal_Mucosa.H3K27ac.29.filt.tagAlign.gz	BI.Rectal_Mucosa.H3K9ac.29.filt.tagAlign.gz				E101			30000000	25399408	28331555	27217596	22245786	29628167	17742431	25567948
	E102	96	Digestive	#C58DAA	GI.RECT.MUC.31	1	0	1	0	1	0	0	0	Rectal Mucosa Donor 31	Rectal_Mucosa.Donor_31	GI_RECTUM	PrimaryTissue	BI	61Y	Female	SOLID	Caucasian	SD	31	Class 4		BI.Rectal_Mucosa.Input.31.filt.tagAlign.gz	BI.Rectal_Mucosa.H3K9me3.31.filt.tagAlign.gz	BI.Rectal_Mucosa.H3K27me3.31.filt.tagAlign.gz	BI.Rectal_Mucosa.H3K4me3.31.filt.tagAlign.gz	BI.Rectal_Mucosa.H3K4me1.31.filt.tagAlign.gz	BI.Rectal_Mucosa.H3K36me3.31.filt.tagAlign.gz	BI.Rectal_Mucosa.H3K27ac.31.filt.tagAlign.gz	BI.Rectal_Mucosa.H3K9ac.31.filt.tagAlign.gz				E102			30000000	30000000	30000000	21058139	23897111	30000000	15885968	19135054
	E110	97	Digestive	#C58DAA	GI.STMC.MUC	0	-1	0	0	0	0	0	0	Stomach Mucosa	Stomach_Mucosa	GI_STOMACH	PrimaryTissue	BI	59Y	Male	SOLID	Caucasian	SD	157	Class 5		BI.Stomach_Mucosa.Input.157.filt.tagAlign.gz	BI.Stomach_Mucosa.H3K9me3.157.filt.tagAlign.gz	BI.Stomach_Mucosa.H3K27me3.157.filt.tagAlign.gz	BI.Stomach_Mucosa.H3K4me3.157.filt.tagAlign.gz	BI.Stomach_Mucosa.H3K4me1.157.filt.tagAlign.gz	BI.Stomach_Mucosa.H3K36me3.157.filt.tagAlign.gz		BI.Stomach_Mucosa.H3K9ac.157.filt.tagAlign.gz				E110			30000000	20887596	30000000	23950798	27797421	30000000		26918659
	E077	98	Digestive	#C58DAA	GI.DUO.MUC	1	0	1	0	0	0	0	0	Duodenum Mucosa	Duodenum_Mucosa	GI_DUODENUM	PrimaryTissue	BI	76Y	Male	SOLID	Caucasian	SD	61	Class 4		BI.Duodenum_Mucosa.Input.61.filt.tagAlign.gz	BI.Duodenum_Mucosa.H3K9me3.61.filt.tagAlign.gz	BI.Duodenum_Mucosa.H3K27me3.61.filt.tagAlign.gz	BI.Duodenum_Mucosa.H3K4me3.61.filt.tagAlign.gz	BI.Duodenum_Mucosa.H3K4me1.61.filt.tagAlign.gz	BI.Duodenum_Mucosa.H3K36me3.61.filt.tagAlign.gz		BI.Duodenum_Mucosa.H3K9ac.61.filt.tagAlign.gz				E077			30000000	25131617	30000000	30000000	30000000	30000000		30000000
	E079	99	Digestive	#C58DAA	GI.ESO	-1	1	0	0	1	0	0	0	Esophagus	Esophagus	GI_ESOPHAGUS	PrimaryTissue	UCSD	34Y	Male	SOLID	Caucasian	SD	STL003	Class 2		UCSD.Esophagus.Input.STL003.filt.tagAlign.gz	UCSD.Esophagus.H3K9me3.STL003.filt.tagAlign.gz	UCSD.Esophagus.H3K27me3.STL003.filt.tagAlign.gz	UCSD.Esophagus.H3K4me3.STL003.filt.tagAlign.gz	UCSD.Esophagus.H3K4me1.STL003.filt.tagAlign.gz	UCSD.Esophagus.H3K36me3.STL003.filt.tagAlign.gz	UCSD.Esophagus.H3K27ac.STL003.filt.tagAlign.gz			E079	E079				30000000	19123277	24579845	16538590	19495504	17259442	19678792
	E094	100	Digestive	#C58DAA	GI.STMC.GAST	-1	1	0	0	1	0	0	0	Gastric	Gastric	GI_STOMACH	PrimaryTissue	UCSD	34Y	Male	SOLID	Caucasian	SD	STL003	Class 2		UCSD.Gastric.Input.STL003.filt.tagAlign.gz	UCSD.Gastric.H3K9me3.STL003.filt.tagAlign.gz	UCSD.Gastric.H3K27me3.STL003.filt.tagAlign.gz	UCSD.Gastric.H3K4me3.STL003.filt.tagAlign.gz	UCSD.Gastric.H3K4me1.STL003.filt.tagAlign.gz	UCSD.Gastric.H3K36me3.STL003.filt.tagAlign.gz	UCSD.Gastric.H3K27ac.STL003.filt.tagAlign.gz		UW.Gastric.ChromatinAccessibility.STL003.DNase.DS20748.filt.tagAlign.gz	E094	E094				30000000	17010399	15423262	19845042	25170873	20144690	16801250		44014357
	E099	101	Other	#999999	PLCNT.AMN	1	-1	0	0	1	0	0	0	Placenta Amnion	Placenta_Amnion	PLACENTA	PrimaryTissue	UCSF-UBC	16GW	Male	SOLID	African American	SD	CTL02	Class 5		UCSF-UBC.Placenta_Amnion.Input.CTL02.filt.tagAlign.gz	UCSF-UBC.Placenta_Amnion.H3K9me3.CTL02.filt.tagAlign.gz	UCSF-UBC.Placenta_Amnion.H3K27me3.CTL02.filt.tagAlign.gz	UCSF-UBC.Placenta_Amnion.H3K4me3.CTL02.filt.tagAlign.gz	UCSF-UBC.Placenta_Amnion.H3K4me1.CTL02.filt.tagAlign.gz	UCSF-UBC.Placenta_Amnion.H3K36me3.CTL02.filt.tagAlign.gz	UCSF-UBC.Placenta_Amnion.H3K27ac.CTL02.filt.tagAlign.gz								25392183	20470349	25408415	21483416	22250049	20685696	25933896
	E086	102	Other	#999999	KID.FET	1	0	1	0	0	0	0	0	Fetal Kidney	Fetal_Kidney	KIDNEY	PrimaryTissue	BI	17GW	Unknown	SOLID	Unknown	SD	H-22676	Class 3		BI.Fetal_Kidney.Input.UW_H23435.filt.tagAlign.gz	BI.Fetal_Kidney.H3K9me3.UW_H-22676.filt.tagAlign.gz	BI.Fetal_Kidney.H3K27me3.UW_H-22676.filt.tagAlign.gz	BI.Fetal_Kidney.H3K4me3.UW_H-22676.filt.tagAlign.gz	BI.Fetal_Kidney.H3K4me1.UW_H-22676.filt.tagAlign.gz	BI.Fetal_Kidney.H3K36me3.UW_H-22676.filt.tagAlign.gz		BI.Fetal_Kidney.H3K9ac.UW_H-22676.filt.tagAlign.gz	UW.Fetal_Kidney.ChromatinAccessibility.H-22676.DS12635.filt.tagAlign.gz			E086			18548118	27700402	30000000	29229697	30000000	29628321		29435642	31523848
	E088	103	Other	#999999	LNG.FET	1	0	1	1	0	0	0	0	Fetal Lung	Fetal_Lung	LUNG	PrimaryTissue	BI		Female/Unknown	SOLID		C	H-22727;UW_H23266;UW_H23284	Class 3		BI.Fetal_Lung.Input.UW_H23284.filt.tagAlign.gz;BI.Fetal_Lung.Input.UW_H23266.filt.tagAlign.gz;BI.Fetal_Lung.Input.UW_H22772.filt.tagAlign.gz	BI.Fetal_Lung.H3K9me3.UW_H23266.filt.tagAlign.gz;BI.Fetal_Lung.H3K9me3.UW_H-22727.filt.tagAlign.gz	BI.Fetal_Lung.H3K27me3.UW_H-22727.filt.tagAlign.gz;BI.Fetal_Lung.H3K27me3.UW_H22772.filt.tagAlign.gz	BI.Fetal_Lung.H3K4me3.UW_H-22727.filt.tagAlign.gz	BI.Fetal_Lung.H3K4me1.UW_H23266.filt.tagAlign.gz;BI.Fetal_Lung.H3K4me1.UW_H22772.filt.tagAlign.gz;BI.Fetal_Lung.H3K4me1.UW_H-22727.filt.tagAlign.gz	BI.Fetal_Lung.H3K36me3.UW_H-22727.filt.tagAlign.gz;BI.Fetal_Lung.H3K36me3.UW_H23284.filt.tagAlign.gz		BI.Fetal_Lung.H3K9ac.UW_H-22727.filt.tagAlign.gz;BI.Fetal_Lung.H3K9ac.UW_H22772.filt.tagAlign.gz	UW.Fetal_Lung.ChromatinAccessibility.H-22727.DS12817.filt.tagAlign.gz;UW.Fetal_Lung.ChromatinAccessibility.H-23284.DS14809.filt.tagAlign.gz;UW.Fetal_Lung.ChromatinAccessibility.H-23266.DS14751.filt.tagAlign.gz;UW.Fetal_Lung.ChromatinAccessibility.H-23284.DS14820.filt.tagAlign.gz;UW.Fetal_Lung.ChromatinAccessibility.H-23266.DS14724.filt.tagAlign.gz			E088			30000000	30000000	30000000	27343567	30000000	30000000		30000000	50000000
	E097	104	Other	#999999	OVRY	1	1	1	0	1	0	0	0	Ovary	Ovary	OVARY	PrimaryTissue	UCSD	30Y	Female	SOLID	Caucasian	SD	STL002	Class 2		UCSD.Ovary.Input.STL002.filt.tagAlign.gz	UCSD.Ovary.H3K9me3.STL002.filt.tagAlign.gz	UCSD.Ovary.H3K27me3.STL002.filt.tagAlign.gz	UCSD.Ovary.H3K4me3.STL002.filt.tagAlign.gz	UCSD.Ovary.H3K4me1.STL002.filt.tagAlign.gz	UCSD.Ovary.H3K36me3.STL002.filt.tagAlign.gz	UCSD.Ovary.H3K27ac.STL002.filt.tagAlign.gz		UW.Ovary.ChromatinAccessibility.STL002.DNase.DS20827.filt.tagAlign.gz	E097	E097				30000000	25814257	28484714	26021916	26603106	25448976	16591070		50000000
	E087	105	Other	#999999	PANC.ISLT	-1	1	0	0	1	0	0	0	Pancreatic Islets	Pancreatic_Islets	PANCREAS	PrimaryTissue	BI;UCSF-UBC	Unknown, Unknown, 45Y	Male	SOLID	Unknown, Unknown, Caucasian	C	pancreatic_islets_normal_0/0/00;pancreatic_islets_normal_3/27/09;ZD4_273	Class 4		BI.Pancreatic_Islets.Input.pancreatic_islets_normal_3_27_09.filt.tagAlign.gz	BI.Pancreatic_Islets.H3K9me3.pancreatic_islets_normal_0_0_00.filt.tagAlign.gz	BI.Pancreatic_Islets.H3K27me3.pancreatic_islets_normal_3_27_09.filt.tagAlign.gz	BI.Pancreatic_Islets.H3K4me3.pancreatic_islets_normal_3_27_09.filt.tagAlign.gz;UCSF-UBC.Pancreatic_Islets.H3K4me3.ZD4_273.filt.tagAlign.gz	BI.Pancreatic_Islets.H3K4me1.pancreatic_islets_normal_3_27_09.filt.tagAlign.gz	BI.Pancreatic_Islets.H3K36me3.pancreatic_islets_normal_3_27_09.filt.tagAlign.gz	UCSF-UBC.Pancreatic_Islets.H3K27ac.ZD4_273.filt.tagAlign.gz	BI.Pancreatic_Islets.H3K9ac.pancreatic_islets_normal_3_27_09.filt.tagAlign.gz		E087		E087			10225696	22101115	12904397	26815847	8446366	8531014	16662142	10327638
	E080	106	Other	#999999	ADRL.GLND.FET	0	1	1	1	1	1	0	0	Fetal Adrenal Gland	Fetal_Adrenal_Gland	ADRENAL	PrimaryTissue	UW	13GW	Male	SOLID	Unknown	SD	H-24800	Class 5		UW.Fetal_Adrenal_Gland.Input.H-24800.Histone.DS23062.filt.tagAlign.gz	UW.Fetal_Adrenal_Gland.H3K9me3.H-24800.Histone.DS23066.filt.tagAlign.gz	UW.Fetal_Adrenal_Gland.H3K27me3.H-24800.Histone.DS23067.filt.tagAlign.gz	UW.Fetal_Adrenal_Gland.H3K4me3.H-24800.Histone.DS23063.filt.tagAlign.gz	UW.Fetal_Adrenal_Gland.H3K4me1.H-24800.Histone.DS23065.filt.tagAlign.gz	UW.Fetal_Adrenal_Gland.H3K36me3.H-24800.Histone.DS23068.filt.tagAlign.gz	UW.Fetal_Adrenal_Gland.H3K27ac.H-24800.Histone.DS23304.filt.tagAlign.gz		UW.Fetal_Adrenal_Gland.ChromatinAccessibility.H-22662.DS12528.filt.tagAlign.gz						25471647	17483622	30000000	30000000	27517966	24430422	19509171		43341776
	E091	107	Other	#999999	PLCNT.FET	0	1	1	1	1	1	0	0	Placenta	Fetal_Placenta	PLACENTA	PrimaryTissue	UW	16GW	Female	SOLID	Unknown	SD	H-24996	Class 5		UW.Fetal_Placenta.Input.H-24996.Histone.DS23024.filt.tagAlign.gz	UW.Fetal_Placenta.H3K9me3.H-24996.Histone.DS23311.filt.tagAlign.gz	UW.Fetal_Placenta.H3K27me3.H-24996.Histone.DS23312.filt.tagAlign.gz	UW.Fetal_Placenta.H3K4me3.H-24996.Histone.DS23300.filt.tagAlign.gz	UW.Fetal_Placenta.H3K4me1.H-24996.Histone.DS23027.filt.tagAlign.gz	UW.Fetal_Placenta.H3K36me3.H-24996.Histone.DS23030.filt.tagAlign.gz	UW.Fetal_Placenta.H3K27ac.H-24996.Histone.DS23301.filt.tagAlign.gz		UW.Fetal_Placenta.ChromatinAccessibility.H-23914.DS17744.filt.tagAlign.gz;UW.Fetal_Placenta.ChromatinAccessibility.H-24272.DS19391.filt.tagAlign.gz;UW.Fetal_Placenta.ChromatinAccessibility.H-24409.DS20346.filt.tagAlign.gz;UW.Fetal_Placenta.ChromatinAccessibility.H-23887.DS17639.filt.tagAlign.gz						18263539	23924737	19275043	19826366	26507300	22120641	21617660		50000000
	E066	108	Other	#999999	LIV.ADLT	1	1	1	1	1	1	0	0	Liver	Adult_Liver	LIVER	PrimaryTissue	BI	Unknown	Mixed	SOLID	Unknown	C	3;4;5	Class 2		BI.Adult_Liver.Input.3.filt.tagAlign.gz;BI.Adult_Liver.Input.4.filt.tagAlign.gz;BI.Adult_Liver.Input.5.filt.tagAlign.gz	BI.Adult_Liver.H3K9me3.3.filt.tagAlign.gz;BI.Adult_Liver.H3K9me3.5.filt.tagAlign.gz;BI.Adult_Liver.H3K9me3.4.filt.tagAlign.gz	BI.Adult_Liver.H3K27me3.3.filt.tagAlign.gz;BI.Adult_Liver.H3K27me3.5.filt.tagAlign.gz	BI.Adult_Liver.H3K4me3.4.filt.tagAlign.gz;BI.Adult_Liver.H3K4me3.3.filt.tagAlign.gz;BI.Adult_Liver.H3K4me3.5.filt.tagAlign.gz	BI.Adult_Liver.H3K4me1.3.filt.tagAlign.gz;BI.Adult_Liver.H3K4me1.4.filt.tagAlign.gz;BI.Adult_Liver.H3K4me1.5.filt.tagAlign.gz	BI.Adult_Liver.H3K36me3.3.filt.tagAlign.gz;BI.Adult_Liver.H3K36me3.5.filt.tagAlign.gz;BI.Adult_Liver.H3K36me3.4.filt.tagAlign.gz	BI.Adult_Liver.H3K27ac.3.filt.tagAlign.gz;BI.Adult_Liver.H3K27ac.4.filt.tagAlign.gz	BI.Adult_Liver.H3K9ac.3.filt.tagAlign.gz;BI.Adult_Liver.H3K9ac.4.filt.tagAlign.gz		E066	E066				30000000	30000000	30000000	30000000	30000000	30000000	30000000	30000000
Has very weak H3K27me3. So repressed chromatin states would be artificially lacking.	E098	109	Other	#999999	PANC	-1	-1	0	0	1	0	0	0	Pancreas	Pancreas	PANCREAS	PrimaryTissue	UCSD	34Y	Male	SOLID	Caucasian	SD	STL003	Class 2		UCSD.Pancreas.Input.STL003.filt.tagAlign.gz	UCSD.Pancreas.H3K9me3.STL003.filt.tagAlign.gz	UCSD.Pancreas.H3K27me3.STL003.filt.tagAlign.gz	UCSD.Pancreas.H3K4me3.STL003.filt.tagAlign.gz	UCSD.Pancreas.H3K4me1.STL003.filt.tagAlign.gz	UCSD.Pancreas.H3K36me3.STL003.filt.tagAlign.gz	UCSD.Pancreas.H3K27ac.STL003.filt.tagAlign.gz		UW.Pancreas.ChromatinAccessibility.STL003.DNase.DS20753.filt.tagAlign.gz	E098	E098				30000000	16517475	12682102	20719609	27782431	27465612	11995712		43085868
	E096	110	Other	#999999	LNG	-1	1	0	0	1	0	0	0	Lung	Lung	LUNG	PrimaryTissue	UCSD	30Y	Female	SOLID	Caucasian	SD	STL002	Class 2		UCSD.Lung.Input.STL002.AY296.filt.tagAlign.gz;UCSD.Lung.Input.STL002.filt.tagAlign.gz	UCSD.Lung.H3K9me3.STL002.filt.tagAlign.gz	UCSD.Lung.H3K27me3.STL002.filt.tagAlign.gz	UCSD.Lung.H3K4me3.STL002.filt.tagAlign.gz	UCSD.Lung.H3K4me1.STL002.filt.tagAlign.gz	UCSD.Lung.H3K36me3.STL002.filt.tagAlign.gz	UCSD.Lung.H3K27ac.STL002.filt.tagAlign.gz			E096	E096				30000000	26030514	26851763	22279970	14290186	21103200	29491686
Has very weak H3K27me3. So Repressed chromatin states will be artificially lacking.	E113	111	Other	#999999	SPLN	-1	-1	0	0	1	0	0	0	Spleen	Spleen	SPLEEN	PrimaryTissue	UCSD	34Y	Male	SOLID	Caucasian	SD	STL003	Class 2		UCSD.Spleen.Input.STL003.filt.tagAlign.gz	UCSD.Spleen.H3K9me3.STL003.filt.tagAlign.gz	UCSD.Spleen.H3K27me3.STL003.filt.tagAlign.gz	UCSD.Spleen.H3K4me3.STL003.filt.tagAlign.gz	UCSD.Spleen.H3K4me1.STL003.filt.tagAlign.gz	UCSD.Spleen.H3K36me3.STL003.filt.tagAlign.gz	UCSD.Spleen.H3K27ac.STL003.filt.tagAlign.gz			E113	E113				28839487	14286063	15457892	16923903	22823512	20093694	16906533
	E114	112	ENCODE2012	#000000	LNG.A549.ETOH002.CNCR	1	-1	0	0	1	0	0	0	A549 EtOH 0.02pct Lung Carcinoma Cell Line	A549_EtOH_0.02pct_Lung_Carcinoma	LUNG	CellLine	BI		Male			SD	A549	ENCODE		wgEncodeBroadHistoneA549ControlEtoh02AlnRep0.filt.tagAlign.gz	wgEncodeBroadHistoneA549H3k9me3Etoh02AlnRep0.filt.tagAlign.gz	wgEncodeBroadHistoneA549H3k27me3Etoh02AlnRep0.filt.tagAlign.gz	wgEncodeBroadHistoneA549H3k4me3Etoh02AlnRep0.filt.tagAlign.gz	wgEncodeBroadHistoneA549H3k4me1Etoh02AlnRep0.filt.tagAlign.gz	wgEncodeBroadHistoneA549H3k36me3Etoh02AlnRep0.filt.tagAlign.gz	wgEncodeBroadHistoneA549H3k27acEtoh02AlnRep0.filt.tagAlign.gz	wgEncodeBroadHistoneA549H3k9acEtoh02AlnRep0.filt.tagAlign.gz	wgEncodeUwDnaseA549AlnRep0.filt.tagAlign.gz	E114		E114			30000000	30000000	30000000	30000000	30000000	30000000	30000000	30000000	50000000
	E115	113	ENCODE2012	#000000	BLD.DND41.CNCR	1	1	1	1	1	1	0	0	Dnd41 TCell Leukemia Cell Line	Dnd41_TCell_Leukemia	BLOOD	CellLine	BI		Male			SD	Dnd41	ENCODE		wgEncodeBroadHistoneDnd41ControlStdAlnRep0.filt.tagAlign.gz	wgEncodeBroadHistoneDnd41H3k9me3AlnRep0.filt.tagAlign.gz	wgEncodeBroadHistoneDnd41H3k27me3AlnRep0.filt.tagAlign.gz	wgEncodeBroadHistoneDnd41H3k4me3AlnRep0.filt.tagAlign.gz	wgEncodeBroadHistoneDnd41H3k4me1AlnRep0.filt.tagAlign.gz	wgEncodeBroadHistoneDnd41H3k36me3AlnRep0.filt.tagAlign.gz	wgEncodeBroadHistoneDnd41H3k27acAlnRep0.filt.tagAlign.gz	wgEncodeBroadHistoneDnd41H3k9acAlnRep0.filt.tagAlign.gz							30000000	30000000	30000000	30000000	30000000	30000000	30000000	30000000
	E116	114	ENCODE2012	#000000	BLD.GM12878	1	0	1	0	1	0	0	0	GM12878 Lymphoblastoid Cells	GM12878_Lymphoblastoid	BLOOD	PrimaryCulture	BI		Female		Caucasian	SD	GM12878	ENCODE		wgEncodeBroadHistoneGm12878ControlStdAlnRep0.filt.tagAlign.gz	wgEncodeBroadHistoneGm12878H3k9me3StdAlnRep0.filt.tagAlign.gz	wgEncodeBroadHistoneGm12878H3k27me3StdAlnRep0.filt.tagAlign.gz	wgEncodeBroadHistoneGm12878H3k4me3StdAlnRep0.filt.tagAlign.gz	wgEncodeBroadHistoneGm12878H3k4me1StdAlnRep0.filt.tagAlign.gz	wgEncodeBroadHistoneGm12878H3k36me3StdAlnRep0.filt.tagAlign.gz	wgEncodeBroadHistoneGm12878H3k27acStdAlnRep0.filt.tagAlign.gz	wgEncodeBroadHistoneGm12878H3k9acStdAlnRep0.filt.tagAlign.gz	wgEncodeUwDnaseGm12878AlnRep0.filt.tagAlign.gz	E116		E116			12554606	30000000	30000000	30000000	30000000	21752969	16702604	17159125	47731280
	E117	115	ENCODE2012	#000000	CRVX.HELAS3.CNCR	1	0	1	0	1	0	0	0	HeLa-S3 Cervical Carcinoma Cell Line	HeLa-S3_Cervical_Carcinoma	CERVIX	CellLine	BI		Female			SD	HeLa-S3	ENCODE		wgEncodeBroadHistoneHelas3ControlStdAlnRep0.filt.tagAlign.gz	wgEncodeBroadHistoneHelas3H3k9me3AlnRep0.filt.tagAlign.gz	wgEncodeBroadHistoneHelas3H3k27me3StdAlnRep0.filt.tagAlign.gz	wgEncodeBroadHistoneHelas3H3k4me3StdAlnRep0.filt.tagAlign.gz	wgEncodeBroadHistoneHelas3H3k4me1StdAlnRep0.filt.tagAlign.gz	wgEncodeBroadHistoneHelas3H3k36me3StdAlnRep0.filt.tagAlign.gz	wgEncodeBroadHistoneHelas3H3k27acStdAlnRep0.filt.tagAlign.gz	wgEncodeBroadHistoneHelas3H3k9acStdAlnRep0.filt.tagAlign.gz	wgEncodeUwDnaseHelas3AlnRep0.filt.tagAlign.gz	E117		E117			30000000	30000000	30000000	30000000	30000000	30000000	30000000	30000000	50000000
	E118	116	ENCODE2012	#000000	LIV.HEPG2.CNCR	0	1	1	1	1	1	0	0	HepG2 Hepatocellular Carcinoma Cell Line	HepG2_Hepatocellular_Carcinoma	LIVER	CellLine	BI		Male			SD	HepG2	ENCODE		wgEncodeBroadHistoneHepg2ControlStdAlnRep0.filt.tagAlign.gz	wgEncodeBroadHistoneHepg2H3k9me3AlnRep0.filt.tagAlign.gz	wgEncodeBroadHistoneHepg2H3k27me3StdAlnRep0.filt.tagAlign.gz	wgEncodeBroadHistoneHepg2H3k4me3StdAlnRep0.filt.tagAlign.gz	wgEncodeBroadHistoneHepg2H3k4me1StdAlnRep0.filt.tagAlign.gz	wgEncodeBroadHistoneHepg2H3k36me3StdAlnRep0.filt.tagAlign.gz	wgEncodeBroadHistoneHepg2H3k27acStdAlnRep0.filt.tagAlign.gz	wgEncodeBroadHistoneHepg2H3k9acStdAlnRep0.filt.tagAlign.gz	wgEncodeUwDnaseHepg2AlnRep0.filt.tagAlign.gz	E118		E118			10748827	30000000	29136989	16348994	30000000	17385674	12391189	20884328	44677472
	E119	117	ENCODE2012	#000000	BRST.HMEC	0	1	1	1	1	1	0	0	HMEC Mammary Epithelial Primary Cells	HMEC_Mammary_Epithelial	BREAST	PrimaryCulture	BI		Unknown			SD	HMEC	ENCODE		wgEncodeBroadHistoneHmecControlStdAlnRep0.filt.tagAlign.gz	wgEncodeBroadHistoneHmecH3k9me3AlnRep0.filt.tagAlign.gz	wgEncodeBroadHistoneHmecH3k27me3StdAlnRep0.filt.tagAlign.gz	wgEncodeBroadHistoneHmecH3k4me3StdAlnRep0.filt.tagAlign.gz	wgEncodeBroadHistoneHmecH3k4me1StdAlnRep0.filt.tagAlign.gz	wgEncodeBroadHistoneHmecH3k36me3StdAlnRep0.filt.tagAlign.gz	wgEncodeBroadHistoneHmecH3k27acStdAlnRep0.filt.tagAlign.gz	wgEncodeBroadHistoneHmecH3k9acStdAlnRep0.filt.tagAlign.gz	wgEncodeUwDnaseHmecAlnRep0.filt.tagAlign.gz	E119		E119			17887776	17334631	15665326	26608778	30000000	18511716	19799387	17011443	50000000
	E120	118	ENCODE2012	#000000	MUS.HSMM	0	1	1	1	1	1	0	0	HSMM Skeletal Muscle Myoblasts Cells	HSMM_Skeletal_Muscle_Myoblasts	MUSCLE	PrimaryCulture	BI		Unknown			SD	HSMM	ENCODE		wgEncodeBroadHistoneHsmmControlStdAlnRep0.filt.tagAlign.gz	wgEncodeBroadHistoneHsmmH3k9me3StdAlnRep0.filt.tagAlign.gz	wgEncodeBroadHistoneHsmmH3k27me3StdAlnRep0.filt.tagAlign.gz	wgEncodeBroadHistoneHsmmH3k4me3StdAlnRep0.filt.tagAlign.gz	wgEncodeBroadHistoneHsmmH3k4me1StdAlnRep0.filt.tagAlign.gz	wgEncodeBroadHistoneHsmmH3k36me3StdAlnRep0.filt.tagAlign.gz	wgEncodeBroadHistoneHsmmH3k27acStdAlnRep0.filt.tagAlign.gz	wgEncodeBroadHistoneHsmmH3k9acStdAlnRep0.filt.tagAlign.gz	wgEncodeUwDnaseHsmmAlnRep0.filt.tagAlign.gz	E120		E120			17075015	30000000	20529194	19561255	19710638	30000000	21768173	17131169	50000000
	E121	119	ENCODE2012	#000000	MUS.HSMMT	1	1	1	1	1	1	0	0	HSMM cell derived Skeletal Muscle Myotubes Cells	HSMMtube_Skeletal_Muscle_Myotubes_Derived_from_HSMM	MUSCLE	PrimaryCulture	BI		Unknown			SD	HSMMtube	ENCODE		wgEncodeBroadHistoneHsmmtControlStdAlnRep0.filt.tagAlign.gz	wgEncodeBroadHistoneHsmmtH3k9me3AlnRep0.filt.tagAlign.gz	wgEncodeBroadHistoneHsmmtH3k27me3AlnRep0.filt.tagAlign.gz	wgEncodeBroadHistoneHsmmtH3k4me3StdAlnRep0.filt.tagAlign.gz	wgEncodeBroadHistoneHsmmtH3k4me1StdAlnRep0.filt.tagAlign.gz	wgEncodeBroadHistoneHsmmtH3k36me3StdAlnRep0.filt.tagAlign.gz	wgEncodeBroadHistoneHsmmtH3k27acStdAlnRep0.filt.tagAlign.gz	wgEncodeBroadHistoneHsmmtH3k9acStdAlnRep0.filt.tagAlign.gz	wgEncodeUwDnaseHsmmtAlnRep0.filt.tagAlign.gz			E121			30000000	30000000	30000000	20030186	24028231	23652669	14620019	23905364	50000000
	E122	120	ENCODE2012	#000000	VAS.HUVEC	1	0	1	0	1	0	0	0	HUVEC Umbilical Vein Endothelial Primary Cells	HUVEC_Umbilical_Vein_Endothelial_Cells	VASCULAR	PrimaryCulture	BI		Unknown			SD	HUVEC	ENCODE		wgEncodeBroadHistoneHuvecControlStdAlnRep0.filt.tagAlign.gz	wgEncodeBroadHistoneHuvecH3k9me3AlnRep0.filt.tagAlign.gz	wgEncodeBroadHistoneHuvecH3k27me3StdAlnRep0.filt.tagAlign.gz	wgEncodeBroadHistoneHuvecH3k4me3StdAlnRep0.filt.tagAlign.gz	wgEncodeBroadHistoneHuvecH3k4me1StdAlnRep0.filt.tagAlign.gz	wgEncodeBroadHistoneHuvecH3k36me3StdAlnRep0.filt.tagAlign.gz	wgEncodeBroadHistoneHuvecH3k27acStdAlnRep0.filt.tagAlign.gz	wgEncodeBroadHistoneHuvecH3k9acStdAlnRep0.filt.tagAlign.gz	wgEncodeUwDnaseHuvecAlnRep0.filt.tagAlign.gz	E122					21260338	30000000	23280856	22614527	27375524	22046983	23263030	15979446	50000000
	E123	121	ENCODE2012	#000000	BLD.K562.CNCR	0	1	1	1	1	1	0	0	K562 Leukemia Cells	K562_Leukemia	BLOOD	PrimaryCulture	BI		Female			SD	K562	ENCODE		wgEncodeBroadHistoneK562ControlStdAlnRep0.filt.tagAlign.gz	wgEncodeBroadHistoneK562H3k9me3StdAlnRep0.filt.tagAlign.gz	wgEncodeBroadHistoneK562H3k27me3StdAlnRep0.filt.tagAlign.gz	wgEncodeBroadHistoneK562H3k4me3StdAlnRep0.filt.tagAlign.gz	wgEncodeBroadHistoneK562H3k4me1StdAlnRep0.filt.tagAlign.gz	wgEncodeBroadHistoneK562H3k36me3StdAlnRep0.filt.tagAlign.gz	wgEncodeBroadHistoneK562H3k27acStdAlnRep0.filt.tagAlign.gz	wgEncodeBroadHistoneK562H3k9acStdAlnRep0.filt.tagAlign.gz	wgEncodeUwDnaseK562AlnRep0.filt.tagAlign.gz	E123		E123			17695407	30000000	18741227	20561626	25818317	20588970	18512078	26133812	50000000
	E124	122	ENCODE2012	#000000	BLD.CD14.MONO	1	1	1	1	1	1	0	0	Monocytes-CD14+ RO01746 Primary Cells	Monocytes-CD14+_RO01746	BLOOD	PrimaryCell	BI		Female			SD	RO01746	ENCODE		wgEncodeBroadHistoneMonocd14ro1746ControlAlnRep0.filt.tagAlign.gz	wgEncodeBroadHistoneMonocd14ro1746H3k9me3AlnRep0.filt.tagAlign.gz	wgEncodeBroadHistoneMonocd14ro1746H3k27me3AlnRep0.filt.tagAlign.gz	wgEncodeBroadHistoneMonocd14ro1746H3k4me3AlnRep0.filt.tagAlign.gz	wgEncodeBroadHistoneMonocd14ro1746H3k4me1AlnRep0.filt.tagAlign.gz	wgEncodeBroadHistoneMonocd14ro1746H3k36me3AlnRep0.filt.tagAlign.gz	wgEncodeBroadHistoneMonocd14ro1746H3k27acAlnRep0.filt.tagAlign.gz	wgEncodeBroadHistoneMonocd14ro1746H3k9acAlnRep0.filt.tagAlign.gz	wgEncodeUwDnaseMonocd14ro1746AlnRep0.filt.tagAlign.gz						30000000	21656842	26235172	24976125	19394484	30000000	30000000	16055943	50000000
	E125	123	ENCODE2012	#000000	BRN.NHA	1	1	1	1	1	1	0	0	NH-A Astrocytes Primary Cells	NH-A_Astrocytes	BRAIN	PrimaryCulture	BI		Unknown			SD	NH-A	ENCODE		wgEncodeBroadHistoneNhaControlStdAlnRep0.filt.tagAlign.gz	wgEncodeBroadHistoneNhaH3k9me3AlnRep0.filt.tagAlign.gz	wgEncodeBroadHistoneNhaH3k27me3StdAlnRep0.filt.tagAlign.gz	wgEncodeBroadHistoneNhaH3k4me3StdAlnRep0.filt.tagAlign.gz	wgEncodeBroadHistoneNhaH3k4me1StdAlnRep0.filt.tagAlign.gz	wgEncodeBroadHistoneNhaH3k36me3StdAlnRep0.filt.tagAlign.gz	wgEncodeBroadHistoneNhaH3k27acStdAlnRep0.filt.tagAlign.gz	wgEncodeBroadHistoneNhaH3k9acAlnRep0.filt.tagAlign.gz	wgEncodeUwDnaseNhaAlnRep0.filt.tagAlign.gz			E125			30000000	30000000	25109312	24466467	23629737	26980400	21925355	30000000	50000000
	E126	124	ENCODE2012	#000000	SKIN.NHDFAD	1	1	1	1	1	1	0	0	NHDF-Ad Adult Dermal Fibroblast Primary Cells	NHDF-Ad_Adult_Dermal_Fibroblasts	SKIN	PrimaryCulture	BI		Female			SD	NHDF-Ad	ENCODE		wgEncodeBroadHistoneNhdfadControlStdAlnRep0.filt.tagAlign.gz	wgEncodeBroadHistoneNhdfadH3k9me3AlnRep0.filt.tagAlign.gz	wgEncodeBroadHistoneNhdfadH3k27me3StdAlnRep0.filt.tagAlign.gz	wgEncodeBroadHistoneNhdfadH3k4me3StdAlnRep0.filt.tagAlign.gz	wgEncodeBroadHistoneNhdfadH3k4me1AlnRep0.filt.tagAlign.gz	wgEncodeBroadHistoneNhdfadH3k36me3StdAlnRep0.filt.tagAlign.gz	wgEncodeBroadHistoneNhdfadH3k27acStdAlnRep0.filt.tagAlign.gz	wgEncodeBroadHistoneNhdfadH3k9acStdAlnRep0.filt.tagAlign.gz	wgEncodeUwDnaseNhdfadAlnRep0.filt.tagAlign.gz			E126			16806474	30000000	30000000	30000000	30000000	30000000	30000000	25251057	50000000
	E127	125	ENCODE2012	#000000	SKIN.NHEK	0	1	1	1	1	1	0	0	NHEK-Epidermal Keratinocyte Primary Cells	NHEK-Epidermal_Keratinocytes	SKIN	PrimaryCulture	BI		Unknown			SD	NHEK	ENCODE		wgEncodeBroadHistoneNhekControlStdAlnRep0.filt.tagAlign.gz	wgEncodeBroadHistoneNhekH3k9me3AlnRep0.filt.tagAlign.gz	wgEncodeBroadHistoneNhekH3k27me3StdAlnRep0.filt.tagAlign.gz	wgEncodeBroadHistoneNhekH3k4me3StdAlnRep0.filt.tagAlign.gz	wgEncodeBroadHistoneNhekH3k4me1StdAlnRep0.filt.tagAlign.gz	wgEncodeBroadHistoneNhekH3k36me3StdAlnRep0.filt.tagAlign.gz	wgEncodeBroadHistoneNhekH3k27acStdAlnRep0.filt.tagAlign.gz	wgEncodeBroadHistoneNhekH3k9acStdAlnRep0.filt.tagAlign.gz	wgEncodeUwDnaseNhekAlnRep0.filt.tagAlign.gz	E127					20364549	30000000	17865993	19053894	23253236	19064897	22517166	19522411	50000000
	E128	126	ENCODE2012	#000000	LNG.NHLF	0	1	1	1	1	1	0	0	NHLF Lung Fibroblast Primary Cells	NHLF_Lung_Fibroblasts	LUNG	PrimaryCulture	BI		Unknown			SD	NHLF	ENCODE		wgEncodeBroadHistoneNhlfControlStdAlnRep0.filt.tagAlign.gz	wgEncodeBroadHistoneNhlfH3k9me3AlnRep0.filt.tagAlign.gz	wgEncodeBroadHistoneNhlfH3k27me3StdAlnRep0.filt.tagAlign.gz	wgEncodeBroadHistoneNhlfH3k4me3StdAlnRep0.filt.tagAlign.gz	wgEncodeBroadHistoneNhlfH3k4me1StdAlnRep0.filt.tagAlign.gz	wgEncodeBroadHistoneNhlfH3k36me3StdAlnRep0.filt.tagAlign.gz	wgEncodeBroadHistoneNhlfH3k27acStdAlnRep0.filt.tagAlign.gz	wgEncodeBroadHistoneNhlfH3k9acStdAlnRep0.filt.tagAlign.gz	wgEncodeUwDnaseNhlfAlnRep0.filt.tagAlign.gz	E128					12868984	30000000	15285316	27390646	18295920	22059290	15453737	15336172	50000000
	E129	127	ENCODE2012	#000000	BONE.OSTEO	1	0	1	0	1	0	0	0	Osteoblast Primary Cells	Osteoblasts	BONE	PrimaryCulture	BI		Unknown			SD	Osteobl	ENCODE		wgEncodeBroadHistoneOsteoblControlStdAlnRep0.filt.tagAlign.gz	wgEncodeBroadHistoneOsteoblH3k9me3StdAlnRep0.filt.tagAlign.gz	wgEncodeBroadHistoneOsteoH3k27me3AlnRep0.filt.tagAlign.gz	wgEncodeBroadHistoneOsteoH3k4me3AlnRep0.filt.tagAlign.gz	wgEncodeBroadHistoneOsteoblH3k4me1StdAlnRep0.filt.tagAlign.gz	wgEncodeBroadHistoneOsteoblH3k36me3StdAlnRep0.filt.tagAlign.gz	wgEncodeBroadHistoneOsteoblH3k27acStdAlnRep0.filt.tagAlign.gz					E129			30000000	30000000	30000000	30000000	30000000	30000000	30000000

## Sheet: Consolidated_EpigenomeIDs_QC
MARK	EID	E-Mnemonic	Standardised epigenome name	Epigenome name (from EDACC Release 9 directory)	MARK CLASS	FNAME	NREADS	FRAGLEN	FCC	RLEN	RCC	MINLEN	MINCC	NSC (Signal to noise)	RSC (Phantom Peak)	SPOT	FindPeaks	Poisson	%of Impute Top 1% in Observed Top 1%	Correlation of Imputed with Observed
DNase	E003	ESC.H1	H1 Cell Line	H1_Cell_Line	Core	E003-DNase.tagAlign.gz	50000000	60	0.458902	45	0.456147	1500	0.340931	1.34603	1.02391	0.241	0.242	0.3	67.6	0.889
DNase	E004	ESDR.H1.BMP4.MESO	H1 BMP4 Derived Mesendoderm Cultured Cells	H1_BMP4_Derived_Mesendoderm_Cultured_Cells	Core	E004-DNase.tagAlign.gz	50000000	60	0.496428	45	0.493708	1500	0.336089	1.47707	1.01726	0.371	0.347	0.449	59.2	0.808
DNase	E005	ESDR.H1.BMP4.TROP	H1 BMP4 Derived Trophoblast Cultured Cells	H1_BMP4_Derived_Trophoblast_Cultured_Cells	Core	E005-DNase.tagAlign.gz	50000000	60	0.467569	40	0.466128	1500	0.385778	1.21202	1.01793	0.188	0.169	0.255	49.6	0.643
DNase	E006	ESDR.H1.MSC	H1 Derived Mesenchymal Stem Cells	H1_Derived_Mesenchymal_Stem_Cells	Core	E006-DNase.tagAlign.gz	50000000	60	0.570143	45	0.56395	1500	0.267598	2.13059	1.0209	0.536	0.503	0.568	65.6	0.846
DNase	E007	ESDR.H1.NEUR.PROG	H1 Derived Neuronal Progenitor Cultured Cells	H1_Derived_Neuronal_Progenitor_Cultured_Cells	Core	E007-DNase.tagAlign.gz	50000000	50	0.467822	45	0.466401	1500	0.36741	1.2733	1.01436	0.235	0.228	0.307	58.4	0.839
DNase	E008	ESC.H9	H9 Cell Line	H9_Cell_Line	Core	E008-DNase.tagAlign.gz	50000000	80	0.418526	35	0.417417	1500	0.363932	1.15001	1.02075	0.205	0.202	0.29	65.5	0.86
DNase	E017	LNG.IMR90	IMR90 fetal lung fibroblasts Cell Line	IMR90_Cell_Line	Core	E017-DNase.tagAlign.gz	50000000	50	0.536492	45	0.535111	1500	0.289859	1.85088	1.00563	0.439	0.385	0.45	70.6	0.87
DNase	E021	IPSC.DF.6.9	iPS DF 6.9 Cell Line	iPS_DF_6.9_Cell_Line	Core	E021-DNase.tagAlign.gz	26681306	50	0.376874	40	0.375971	1500	0.28766	1.31014	1.01023	0.308	0.269	0.399	62	0.819
DNase	E022	IPSC.DF.19.11	iPS DF 19.11 Cell Line	iPS_DF_19.11_Cell_Line	Core	E022-DNase.tagAlign.gz	26661713	50	0.40126	45	0.400306	1500	0.277351	1.44676	1.00776	0.342	0.288	0.4	54.8	0.768
DNase	E028	BRST.HMEC.35	Breast variant Human Mammary Epithelial Cells (vHMEC)	Breast_vHMEC	Core	E028-DNase.tagAlign.gz	50000000	80	0.585069	45	0.57467	1500	0.358174	1.63348	1.04803	0.474	0.386	0.523	75.3	0.887
DNase	E029	BLD.CD14.PC	Primary monocytes from peripheral blood	CD14_Primary_Cells	Core	E029-DNase.tagAlign.gz	47268789	60	0.511346	45	0.507472	1500	0.2366	2.16123	1.0143	0.39	0.398	0.401	69.7	0.844
DNase	E032	BLD.CD19.PPC	Primary B cells from peripheral blood	CD19_Primary_Cells_Peripheral_UW	Core	E032-DNase.tagAlign.gz	50000000	50	0.473929	40	0.47311	1500	0.294561	1.60893	1.00458	0.358	0.369	0.419	66.4	0.884
DNase	E033	BLD.CD3.CPC	Primary T cells from cord blood	CD3_Primary_Cells_Cord_BI	Core	E033-DNase.tagAlign.gz	42421955	55	0.481731	45	0.477684	1500	0.243553	1.97793	1.01728	0.378	0.382	0.404	64.2	0.888
DNase	E034	BLD.CD3.PPC	Primary T cells from peripheral blood	CD3_Primary_Cells_Peripheral_UW	Core	E034-DNase.tagAlign.gz	50000000	40	0.497045	45	0.494242	1500	0.269837	1.84202	1.01249	0.406	0.422	0.454	69.4	0.918
DNase	E046	BLD.CD56.PC	Primary Natural Killer cells from peripheral blood	CD56_Primary_Cells	Core	E046-DNase.tagAlign.gz	50000000	50	0.501262	40	0.500786	1500	0.258235	1.94111	1.00196	0.393	0.398	0.411	72.7	0.914
DNase	E050	BLD.MOB.CD34.PC.F	Primary hematopoietic stem cells G-CSF-mobilized Female	Mobilized_CD34_Primary_Cells_Female	Core	E050-DNase.tagAlign.gz	50000000	50	0.522151	45	0.520533	1500	0.219353	2.38041	1.00537	0.531	0.512	0.528	70.4	0.889
DNase	E051	BLD.MOB.CD34.PC.M	Primary hematopoietic stem cells G-CSF-mobilized Male	Mobilized_CD34_Primary_Cells_Male	Core	E051-DNase.tagAlign.gz	43764509	50	0.480711	45	0.479425	1500	0.241556	1.99006	1.00541	0.414	0.396	0.418	71.5	0.889
DNase	E055	SKIN.PEN.FRSK.FIB.01	Foreskin Fibroblast Primary Cells skin01	Penis_Foreskin_Fibroblast_Primary_Cells_skin01	Core	E055-DNase.tagAlign.gz	50000000	50	0.585548	45	0.582511	1500	0.195202	2.9997	1.00784	0.663	0.657	0.692	79.9	0.929
DNase	E056	SKIN.PEN.FRSK.FIB.02	Foreskin Fibroblast Primary Cells skin02	Penis_Foreskin_Fibroblast_Primary_Cells_skin02	Core	E056-DNase.tagAlign.gz	50000000	55	0.617056	45	0.605749	1500	0.181227	3.40488	1.02664	0.744	0.719	0.749	80.6	0.938
DNase	E057	SKIN.PEN.FRSK.KER.02	Foreskin Keratinocyte Primary Cells skin02	Penis_Foreskin_Keratinocyte_Primary_Cells_skin02	Core	E057-DNase.tagAlign.gz	50000000	80	0.534745	45	0.522732	1500	0.284341	1.88065	1.05039	0.504	0.471	0.556	61.7	0.759
DNase	E059	SKIN.PEN.FRSK.MEL.01	Foreskin Melanocyte Primary Cells skin01	Penis_Foreskin_Melanocyte_Primary_Cells_skin01	Core	E059-DNase.tagAlign.gz	50000000	80	0.52585	45	0.51164	1500	0.275343	1.9098	1.06014	0.489	0.474	0.543	44	0.589
DNase	E080	ADRL.GLND.FET	Fetal Adrenal Gland	Fetal_Adrenal_Gland	Core	E080-DNase.tagAlign.gz	43341776	45	0.476247	40	0.475385	1500	0.235606	2.02137	1.0036	0.439	0.444	0.491	53.9	0.829
DNase	E081	BRN.FET.M	Fetal Brain Male	Fetal_Brain_Male	Core	E081-DNase.tagAlign.gz	50000000	55	0.507978	45	0.503666	1500	0.156038	3.25546	1.0124	0.639	0.645	0.628	50.6	0.762
DNase	E082	BRN.FET.F	Fetal Brain Female	Fetal_Brain_Female	Core	E082-DNase.tagAlign.gz	26680226	50	0.427338	45	0.423245	1500	0.133262	3.20676	1.01412	0.589	0.599	0.6	56.3	0.794
DNase	E083	HRT.FET	Fetal Heart	Fetal_Heart	Core	E083-DNase.tagAlign.gz	50000000	50	0.481211	45	0.478334	1500	0.321026	1.49898	1.01829	0.43	0.417	0.53	52.5	0.773
DNase	E084	GI.L.INT.FET	Fetal Intestine Large	Fetal_Intestine_Large	Core	E084-DNase.tagAlign.gz	28689628	50	0.350045	45	0.348349	1500	0.221716	1.5788	1.01339	0.388	0.39	0.439	63	0.791
DNase	E085	GI.S.INT.FET	Fetal Intestine Small	Fetal_Intestine_Small	Core	E085-DNase.tagAlign.gz	25353195	50	0.307425	40	0.307022	1500	0.226817	1.35539	1.00503	0.326	0.333	0.393	64.6	0.825
DNase	E086	KID.FET	Fetal Kidney	Fetal_Kidney	Core	E086-DNase.tagAlign.gz	31523848	40	0.436401	45	0.435501	1500	0.181986	2.39799	1.00355	0.461	0.458	0.493	53.7	0.832
DNase	E088	LNG.FET	Fetal Lung	Fetal_Lung	Core	E088-DNase.tagAlign.gz	50000000	50	0.502975	45	0.498377	1500	0.216576	2.3224	1.01632	0.574	0.596	0.624	58.6	0.827
DNase	E089	MUS.TRNK.FET	Fetal Muscle Trunk	Fetal_Muscle_Trunk	Core	E089-DNase.tagAlign.gz	50000000	50	0.489002	45	0.484249	1500	0.271526	1.80094	1.02235	0.436	0.453	0.494	70.1	0.913
DNase	E090	MUS.LEG.FET	Fetal Muscle Leg	Fetal_Muscle_Leg	Core	E090-DNase.tagAlign.gz	50000000	50	0.479874	45	0.475013	1500	0.293829	1.63317	1.02683	0.42	0.442	0.5	68.4	0.898
DNase	E091	PLCNT.FET	Placenta	Fetal_Placenta	Core	E091-DNase.tagAlign.gz	50000000	50	0.481641	45	0.477395	1500	0.296823	1.62265	1.02351	0.378	0.397	0.449	52	0.741
DNase	E092	GI.STMC.FET	Fetal Stomach	Fetal_Stomach	Core	E092-DNase.tagAlign.gz	50000000	50	0.461877	45	0.458945	1500	0.33023	1.39865	1.02278	0.317	0.32	0.4	63.3	0.878
DNase	E093	THYM.FET	Fetal Thymus	Fetal_Thymus	Core	E093-DNase.tagAlign.gz	50000000	50	0.461989	45	0.458608	1500	0.308891	1.49564	1.02258	0.301	0.311	0.348	64.1	0.87
DNase	E094	GI.STMC.GAST	Gastric	Gastric	Core	E094-DNase.tagAlign.gz	44014357	55	0.419844	45	0.418312	1500	0.309501	1.35652	1.01408	0.223	0.221	0.272	53.5	0.755
DNase	E097	OVRY	Ovary	Ovary	Core	E097-DNase.tagAlign.gz	50000000	45	0.456366	40	0.455793	1500	0.312264	1.46147	1.00399	0.286	0.308	0.361	56.4	0.836
DNase	E098	PANC	Pancreas	Pancreas	Core	E098-DNase.tagAlign.gz	43085868	55	0.448257	45	0.445734	1500	0.305751	1.46609	1.01802	0.273	0.26	0.334	59.1	0.818
DNase	E100	MUS.PSOAS	Psoas Muscle	Psoas_Muscle	Core	E100-DNase.tagAlign.gz	40950995	55	0.46044	45	0.457743	1500	0.263747	1.74576	1.0139	0.371	0.387	0.443	58	0.815
DNase	E109	GI.S.INT	Small Intestine	Small_Intestine	Core	E109-DNase.tagAlign.gz	45831607	50	0.521939	45	0.519831	1500	0.275393	1.89525	1.00862	0.432	0.419	0.477	54.2	0.744
DNase	E114	LNG.A549.ETOH002.CNCR	A549 EtOH 0.02pct Lung Carcinoma Cell Line	A549_EtOH_0.02pct_Lung_Carcinoma	Core	E114-DNase.tagAlign.gz	50000000	50	0.57922	45	0.577617	1500	0.428187	1.35273	1.01073	0.43	0.258	0.462	54.8	0.729
DNase	E116	BLD.GM12878	GM12878 Lymphoblastoid Cell Line	GM12878_Lymphoblastoid	Core	E116-DNase.tagAlign.gz	47731280	80	0.481739	45	0.473677	1500	0.335312	1.43669	1.05827	0.396	0.319	0.411	61.5	0.804
DNase	E117	CRVX.HELAS3.CNCR	HeLa-S3 Cervical Carcinoma Cell Line	HeLa-S3_Cervical_Carcinoma	Core	E117-DNase.tagAlign.gz	50000000	100	0.598982	45	0.568526	1500	0.380373	1.57472	1.16187	0.58	0.394	0.573	54.3	0.653
DNase	E118	LIV.HEPG2.CNCR	HepG2 Hepatocellular Carcinoma Cell Line	HepG2_Hepatocellular_Carcinoma	Core	E118-DNase.tagAlign.gz	44677472	70	0.482292	35	0.454234	1500	0.246469	1.95681	1.13504	0.591	0.484	0.529	48.2	0.698
DNase	E119	BRST.HMEC	HMEC Mammary Epithelial Primary Cells	HMEC_Mammary_Epithelial	Core	E119-DNase.tagAlign.gz	50000000	80	0.560995	40	0.551482	1500	0.44328	1.26555	1.08792	0.429	0.257	0.449	68.2	0.821
DNase	E120	MUS.HSMM	HSMM Skeletal Muscle Myoblasts Cell Line	HSMM_Skeletal_Muscle_Myoblasts	Core	E120-DNase.tagAlign.gz	50000000	55	0.572304	45	0.566268	1500	0.323368	1.76982	1.02485	0.614	0.471	0.596	67.4	0.813
DNase	E121	MUS.HSMMT	HSMM cell derived Skeletal Muscle Myotubes Cell Line	HSMMtube_Skeletal_Muscle_Myotubes_Derived_from_HSMM	Core	E121-DNase.tagAlign.gz	50000000	50	0.572207	45	0.569246	1500	0.359333	1.59241	1.01411	0.578	0.449	0.606	69.8	0.859
DNase	E122	VAS.HUVEC	HUVEC Umbilical Vein Endothelial Cells Cell Line	HUVEC_Umbilical_Vein_Endothelial_Cells	Core	E122-DNase.tagAlign.gz	50000000	60	0.468934	45	0.464735	1500	0.342245	1.37017	1.03428	0.351	0.29	0.375	51.8	0.701
DNase	E123	BLD.K562.CNCR	K562 Leukemia Cell Line	K562_Leukemia	Core	E123-DNase.tagAlign.gz	50000000	80	0.595192	40	0.579794	1500	0.442153	1.34612	1.11187	0.512	0.311	0.541	45.6	0.681
DNase	E124	BLD.CD14.MONO	Monocytes-CD14+ RO01746 Cell Line	Monocytes-CD14+_RO01746	Core	E124-DNase.tagAlign.gz	50000000	65	0.489624	45	0.473912	1500	0.185537	2.63896	1.05448	0.52	0.488	0.471	73.2	0.897
DNase	E125	BRN.NHA	NH-A Astrocytes Cell Line	NH-A_Astrocytes	Core	E125-DNase.tagAlign.gz	50000000	60	0.549861	45	0.544655	1500	0.291163	1.8885	1.02054	0.554	0.452	0.535	73	0.876
DNase	E126	SKIN.NHDFAD	NHDF-Ad Adult Dermal Fibroblast Primary Cells	NHDF-Ad_Adult_Dermal_Fibroblasts	Core	E126-DNase.tagAlign.gz	50000000	55	0.560187	45	0.552658	1500	0.143958	3.89133	1.01842	0.77	0.77	0.733	58.5	0.755
DNase	E127	SKIN.NHEK	NHEK-Epidermal Keratinocyte Primary Cells	NHEK-Epidermal_Keratinocytes	Core	E127-DNase.tagAlign.gz	50000000	55	0.488389	45	0.483592	1500	0.363493	1.3436	1.03994	0.339	0.251	0.351	62	0.768
DNase	E128	LNG.NHLF	NHLF Lung Fibroblast Primary Cells	NHLF_Lung_Fibroblasts	Core	E128-DNase.tagAlign.gz	50000000	55	0.576113	45	0.569138	1500	0.290608	1.98244	1.02504	0.618	0.496	0.59	61.3	0.794
H2A.Z	E003	ESC.H1	H1 Cell Line	H1_Cell_Line	Class1	E003-H2A.Z.tagAlign.gz	8121158	140	0.119097	40	0.10905	1500	0.10033	1.18705	2.15226	0.24	0.12	0.37	24	0.392
H2A.Z	E005	ESDR.H1.BMP4.TROP	H1 BMP4 Derived Trophoblast Cultured Cells	H1_BMP4_Derived_Trophoblast_Cultured_Cells	Class1	E005-H2A.Z.tagAlign.gz	19539869	140	0.250174	35	0.243588	1500	0.217208	1.15177	1.24963	0.28	0.22	0.48	52.7	0.737
H2A.Z	E006	ESDR.H1.MSC	H1 Derived Mesenchymal Stem Cells	H1_Derived_Mesenchymal_Stem_Cells	Class1	E006-H2A.Z.tagAlign.gz	18950133	130	0.233787	35	0.225668	1500	0.207799	1.12506	1.45439	0.17	0.09	0.39	41.6	0.666
H2A.Z	E008	ESC.H9	H9 Cell Line	H9_Cell_Line	Class1	E008-H2A.Z.tagAlign.gz	45000000	130	0.400163	35	0.388483	1500	0.373701	1.07081	1.79012	0.16	0.07	0.3	33.8	0.511
H2A.Z	E009	ESDR.H9.NEUR.PROG	H9 Derived Neuronal Progenitor Cultured Cells	H9_Derived_Neuronal_Progenitor_Cultured_Cells	Class1	E009-H2A.Z.tagAlign.gz	45000000	190	0.459488	35	0.430617	1500	0.368092	1.2483	1.46176	0.37	0.32	0.46	72.1	0.855
H2A.Z	E010	ESDR.H9.NEUR	H9 Derived Neuron Cultured Cells	H9_Derived_Neuron_Cultured_Cells	Class1	E010-H2A.Z.tagAlign.gz	19771741	310	0.231475	35	0.228832	1500	0.215066	1.0763	1.19201	0.15	0.11	0.31	62.7	0.749
H2A.Z	E017	LNG.IMR90	IMR90 fetal lung fibroblasts Cell Line	IMR90_Cell_Line	Class1	E017-H2A.Z.tagAlign.gz	45000000	130	0.446198	35	0.416991	1500	0.365722	1.22005	1.5697	0.34	0.26	0.46	62.4	0.807
H2A.Z	E114	LNG.A549.ETOH002.CNCR	A549 EtOH 0.02pct Lung Carcinoma Cell Line	A549_EtOH_0.02pct_Lung_Carcinoma	Class1	E114-H2A.Z.tagAlign.gz	43949662	240	0.401894	35	0.400823	1500	0.373175	1.07696	1.03871	0.22	0.16	0.35	66	0.787
H2A.Z	E115	BLD.DND41.CNCR	Dnd41 TCell Leukemia Cell Line	Dnd41_TCell_Leukemia	Class1	E115-H2A.Z.tagAlign.gz	38035092	140	0.395359	35	0.383502	1500	0.335619	1.178	1.24762	0.2	0.18	0.3	64.6	0.844
H2A.Z	E116	BLD.GM12878	GM12878 Lymphoblastoid Cell Line	GM12878_Lymphoblastoid	Class1	E116-H2A.Z.tagAlign.gz	29200617	150	0.344701	35	0.329017	1500	0.281379	1.22504	1.32924	0.28	0.27	0.38	65.3	0.828
H2A.Z	E117	CRVX.HELAS3.CNCR	HeLa-S3 Cervical Carcinoma Cell Line	HeLa-S3_Cervical_Carcinoma	Class1	E117-H2A.Z.tagAlign.gz	45000000	155	0.397936	35	0.398268	1500	0.378075	1.05253	0.983562	0.15	0.08	0.28	60	0.778
H2A.Z	E118	LIV.HEPG2.CNCR	HepG2 Hepatocellular Carcinoma Cell Line	HepG2_Hepatocellular_Carcinoma	Class1	E118-H2A.Z.tagAlign.gz	45000000	180	0.399894	30	0.398905	1500	0.384071	1.0412	1.06666	0.13	0.07	0.27	45.1	0.619
H2A.Z	E119	BRST.HMEC	HMEC Mammary Epithelial Primary Cells	HMEC_Mammary_Epithelial	Class1	E119-H2A.Z.tagAlign.gz	31219850	175	0.373086	35	0.351769	1500	0.287219	1.29896	1.33025	0.34	0.33	0.45	72.3	0.888
H2A.Z	E120	MUS.HSMM	HSMM Skeletal Muscle Myoblasts Cell Line	HSMM_Skeletal_Muscle_Myoblasts	Class1	E120-H2A.Z.tagAlign.gz	33013961	150	0.36798	35	0.355598	1500	0.303912	1.21081	1.23956	0.28	0.26	0.4	73.1	0.889
H2A.Z	E121	MUS.HSMMT	HSMM cell derived Skeletal Muscle Myotubes Cell Line	HSMMtube_Skeletal_Muscle_Myotubes_Derived_from_HSMM	Class1	E121-H2A.Z.tagAlign.gz	27613092	180	0.324317	35	0.315817	1500	0.2692	1.20474	1.18233	0.27	0.24	0.39	72.3	0.887
H2A.Z	E122	VAS.HUVEC	HUVEC Umbilical Vein Endothelial Cells Cell Line	HUVEC_Umbilical_Vein_Endothelial_Cells	Class1	E122-H2A.Z.tagAlign.gz	45000000	150	0.449281	35	0.429555	1500	0.366767	1.22498	1.31417	0.36	0.31	0.45	67.6	0.841
H2A.Z	E123	BLD.K562.CNCR	K562 Leukemia Cell Line	K562_Leukemia	Class1	E123-H2A.Z.tagAlign.gz	34302966	150	0.400801	35	0.381877	1500	0.323313	1.23967	1.32313	0.36	0.37	0.5	58.1	0.762
H2A.Z	E124	BLD.CD14.MONO	Monocytes-CD14+ RO01746 Cell Line	Monocytes-CD14+_RO01746	Class1	E124-H2A.Z.tagAlign.gz	19443230	225	0.259131	35	0.249251	1500	0.213668	1.21277	1.27766	0.28	0.24	0.41	68.5	0.821
H2A.Z	E125	BRN.NHA	NH-A Astrocytes Cell Line	NH-A_Astrocytes	Class1	E125-H2A.Z.tagAlign.gz	35640816	175	0.355353	35	0.352842	1500	0.323564	1.09825	1.08576	0.15	0.12	0.26	73.4	0.881
H2A.Z	E126	SKIN.NHDFAD	NHDF-Ad Adult Dermal Fibroblast Primary Cells	NHDF-Ad_Adult_Dermal_Fibroblasts	Class1	E126-H2A.Z.tagAlign.gz	36599760	170	0.366339	35	0.359369	1500	0.331724	1.10435	1.25212	0.17	0.13	0.3	65.6	0.817
H2A.Z	E127	SKIN.NHEK	NHEK-Epidermal Keratinocyte Primary Cells	NHEK-Epidermal_Keratinocytes	Class1	E127-H2A.Z.tagAlign.gz	45000000	140	0.41896	35	0.408959	1500	0.373012	1.12318	1.27822	0.27	0.23	0.39	64.8	0.834
H2A.Z	E128	LNG.NHLF	NHLF Lung Fibroblast Primary Cells	NHLF_Lung_Fibroblasts	Class1	E128-H2A.Z.tagAlign.gz	45000000	135	0.4214	35	0.410484	1500	0.373424	1.12848	1.29456	0.28	0.22	0.41	63.9	0.823
H2A.Z	E129	BONE.OSTEO	Osteoblast Primary Cells	Osteoblasts	Class1	E129-H2A.Z.tagAlign.gz	45000000	170	0.417689	35	0.406875	1500	0.37286	1.12023	1.3179	0.26	0.2	0.38	67.1	0.848
H2AK5ac	E003	ESC.H1	H1 Cell Line	H1_Cell_Line	Class1	E003-H2AK5ac.tagAlign.gz	40896776	100	0.372627	35	0.371789	1500	0.356161	1.04623	1.05364	0.07	0.01	0.23	29.8	0.598
H2AK5ac	E004	ESDR.H1.BMP4.MESO	H1 BMP4 Derived Mesendoderm Cultured Cells	H1_BMP4_Derived_Mesendoderm_Cultured_Cells	Class1	E004-H2AK5ac.tagAlign.gz	45000000	130	0.388071	35	0.386026	1500	0.37541	1.03373	1.19265	0.14	0.03	0.32	25.8	0.558
H2AK5ac	E005	ESDR.H1.BMP4.TROP	H1 BMP4 Derived Trophoblast Cultured Cells	H1_BMP4_Derived_Trophoblast_Cultured_Cells	Class1	E005-H2AK5ac.tagAlign.gz	45000000	135	0.423224	35	0.411735	1500	0.388903	1.08825	1.50318	0.33	0.28	0.53	58.2	0.794
H2AK5ac	E006	ESDR.H1.MSC	H1 Derived Mesenchymal Stem Cells	H1_Derived_Mesenchymal_Stem_Cells	Class1	E006-H2AK5ac.tagAlign.gz	45000000	120	0.348766	35	0.340715	1500	0.328315	1.06229	1.64922	0.24	0.14	0.4	27.1	0.55
H2AK5ac	E007	ESDR.H1.NEUR.PROG	H1 Derived Neuronal Progenitor Cultured Cells	H1_Derived_Neuronal_Progenitor_Cultured_Cells	Class1	E007-H2AK5ac.tagAlign.gz	45000000	100	0.401407	35	0.398343	1500	0.382455	1.04956	1.1929	0.2	0.09	0.41	29.8	0.658
H2AK5ac	E008	ESC.H9	H9 Cell Line	H9_Cell_Line	Class1	E008-H2AK5ac.tagAlign.gz	45000000	120	0.387048	30	0.387912	1500	0.376697	1.02748	0.923008	0.09	0.01	0.24	19.5	0.547
H2AK5ac	E017	LNG.IMR90	IMR90 fetal lung fibroblasts Cell Line	IMR90_Cell_Line	Class1	E017-H2AK5ac.tagAlign.gz	30984740	100	0.374859	45	0.355958	1500	0.320017	1.17137	1.52591	0.42	0.44	0.62	57.6	0.727
H2AK9ac	E017	LNG.IMR90	IMR90 fetal lung fibroblasts Cell Line	IMR90_Cell_Line	Class1	E017-H2AK9ac.tagAlign.gz	45000000	120	0.241645	35	0.235343	1500	0.221156	1.09265	1.44425	0.33	0.15	0.44
H2BK120ac	E003	ESC.H1	H1 Cell Line	H1_Cell_Line	Class1	E003-H2BK120ac.tagAlign.gz	38870659	125	0.355576	35	0.356928	1500	0.345418	1.02941	0.882567	0.07	0.01	0.18	34.4	0.582
H2BK120ac	E004	ESDR.H1.BMP4.MESO	H1 BMP4 Derived Mesendoderm Cultured Cells	H1_BMP4_Derived_Mesendoderm_Cultured_Cells	Class1	E004-H2BK120ac.tagAlign.gz	29709678	145	0.307262	35	0.30609	1500	0.292116	1.05185	1.0838	0.1	0.04	0.31	44.1	0.664
H2BK120ac	E005	ESDR.H1.BMP4.TROP	H1 BMP4 Derived Trophoblast Cultured Cells	H1_BMP4_Derived_Trophoblast_Cultured_Cells	Class1	E005-H2BK120ac.tagAlign.gz	29539483	135	0.345172	35	0.330292	1500	0.302183	1.14226	1.52937	0.3	0.29	0.48	70	0.839
H2BK120ac	E006	ESDR.H1.MSC	H1 Derived Mesenchymal Stem Cells	H1_Derived_Mesenchymal_Stem_Cells	Class1	E006-H2BK120ac.tagAlign.gz	16339422	150	0.204771	35	0.201972	1500	0.190279	1.07616	1.23933	0.18	0.12	0.36	44.9	0.643
H2BK120ac	E007	ESDR.H1.NEUR.PROG	H1 Derived Neuronal Progenitor Cultured Cells	H1_Derived_Neuronal_Progenitor_Cultured_Cells	Class1	E007-H2BK120ac.tagAlign.gz	37263707	110	0.348648	35	0.345803	1500	0.330497	1.05492	1.18589	0.06	0.01	0.28	23.2	0.563
H2BK120ac	E008	ESC.H9	H9 Cell Line	H9_Cell_Line	Class1	E008-H2BK120ac.tagAlign.gz	9982699	150	0.126487	35	0.129754	1500	0.122458	1.0329	0.552185	0.13	0.05	0.29	22	0.416
H2BK120ac	E017	LNG.IMR90	IMR90 fetal lung fibroblasts Cell Line	IMR90_Cell_Line	Class1	E017-H2BK120ac.tagAlign.gz	41714212	120	0.492006	45	0.455367	1500	0.389836	1.26208	1.5591	0.51	0.54	0.65	72.7	0.86
H2BK12ac	E003	ESC.H1	H1 Cell Line	H1_Cell_Line	Class1	E003-H2BK12ac.tagAlign.gz	40595600	100	0.378326	35	0.372732	1500	0.354571	1.06699	1.308	0.11	0.04	0.3	41.2	0.675
H2BK12ac	E005	ESDR.H1.BMP4.TROP	H1 BMP4 Derived Trophoblast Cultured Cells	H1_BMP4_Derived_Trophoblast_Cultured_Cells	Class1	E005-H2BK12ac.tagAlign.gz	45000000	130	0.431812	35	0.415489	1500	0.388492	1.11151	1.60465	0.37	0.35	0.54	63.1	0.839
H2BK12ac	E006	ESDR.H1.MSC	H1 Derived Mesenchymal Stem Cells	H1_Derived_Mesenchymal_Stem_Cells	Class1	E006-H2BK12ac.tagAlign.gz	45000000	115	0.261647	35	0.251939	1500	0.233273	1.12163	1.52013	0.41	0.29	0.51	55.6	0.744
H2BK12ac	E007	ESDR.H1.NEUR.PROG	H1 Derived Neuronal Progenitor Cultured Cells	H1_Derived_Neuronal_Progenitor_Cultured_Cells	Class1	E007-H2BK12ac.tagAlign.gz	36581817	130	0.327493	35	0.328297	1500	0.313277	1.04538	0.946449	0.08	0.02	0.3	32.9	0.64
H2BK12ac	E008	ESC.H9	H9 Cell Line	H9_Cell_Line	Class1	E008-H2BK12ac.tagAlign.gz	45000000	130	0.390171	30	0.389884	1500	0.377388	1.03387	1.02292	0.11	0.02	0.27	29.1	0.618
H2BK12ac	E017	LNG.IMR90	IMR90 fetal lung fibroblasts Cell Line	IMR90_Cell_Line	Class1	E017-H2BK12ac.tagAlign.gz	45000000	120	0.482814	45	0.448819	1500	0.4024	1.19983	1.73236	0.54	0.56	0.66	73.5	0.858
H2BK15ac	E003	ESC.H1	H1 Cell Line	H1_Cell_Line	Class1	E003-H2BK15ac.tagAlign.gz	45000000	110	0.393567	35	0.39206	1500	0.378773	1.03906	1.11336	0.13	0.03	0.31	24.7	0.591
H2BK15ac	E004	ESDR.H1.BMP4.MESO	H1 BMP4 Derived Mesendoderm Cultured Cells	H1_BMP4_Derived_Mesendoderm_Cultured_Cells	Class1	E004-H2BK15ac.tagAlign.gz	34298678	145	0.329912	40	0.328458	1500	0.321187	1.02717	1.19988	0.05	0	0.26	25.6	0.512
H2BK15ac	E007	ESDR.H1.NEUR.PROG	H1 Derived Neuronal Progenitor Cultured Cells	H1_Derived_Neuronal_Progenitor_Cultured_Cells	Class1	E007-H2BK15ac.tagAlign.gz	45000000	110	0.39666	35	0.395372	1500	0.381821	1.03886	1.09507	0.17	0.06	0.37	31.2	0.647
H2BK15ac	E008	ESC.H9	H9 Cell Line	H9_Cell_Line	Class1	E008-H2BK15ac.tagAlign.gz	45000000	140	0.387141	35	0.387787	1500	0.375006	1.03236	0.949419	0.12	0.01	0.31	20.5	0.602
H2BK15ac	E017	LNG.IMR90	IMR90 fetal lung fibroblasts Cell Line	IMR90_Cell_Line	Class1	E017-H2BK15ac.tagAlign.gz	44829683	115	0.43172	45	0.415729	1500	0.39046	1.10567	1.6328	0.32	0.33	0.53	63	0.753
H2BK20ac	E003	ESC.H1	H1 Cell Line	H1_Cell_Line	Class1	E003-H2BK20ac.tagAlign.gz	45000000	100	0.393059	35	0.393407	1500	0.378647	1.03806	0.97638	0.13	0.04	0.3	31.6	0.567
H2BK20ac	E008	ESC.H9	H9 Cell Line	H9_Cell_Line	Class1	E008-H2BK20ac.tagAlign.gz	11791121	160	0.142924	35	0.146607	1500	0.139887	1.02171	0.451928	0.1	0.02	0.27	15.6	0.401
H2BK20ac	E017	LNG.IMR90	IMR90 fetal lung fibroblasts Cell Line	IMR90_Cell_Line	Class1	E017-H2BK20ac.tagAlign.gz	42877731	120	0.447307	35	0.421555	1500	0.383928	1.16508	1.68438	0.38	0.38	0.55	72	0.734
H2BK5ac	E003	ESC.H1	H1 Cell Line	H1_Cell_Line	Class1	E003-H2BK5ac.tagAlign.gz	39721458	105	0.373227	35	0.370927	1500	0.350717	1.06418	1.11376	0.11	0.06	0.29	45.8	0.712
H2BK5ac	E004	ESDR.H1.BMP4.MESO	H1 BMP4 Derived Mesendoderm Cultured Cells	H1_BMP4_Derived_Mesendoderm_Cultured_Cells	Class1	E004-H2BK5ac.tagAlign.gz	45000000	130	0.381767	35	0.379839	1500	0.365896	1.04338	1.1383	0.15	0.06	0.29	42.3	0.617
H2BK5ac	E005	ESDR.H1.BMP4.TROP	H1 BMP4 Derived Trophoblast Cultured Cells	H1_BMP4_Derived_Trophoblast_Cultured_Cells	Class1	E005-H2BK5ac.tagAlign.gz	30094966	140	0.348726	35	0.332899	1500	0.301852	1.15529	1.50978	0.27	0.25	0.46	72.2	0.843
H2BK5ac	E006	ESDR.H1.MSC	H1 Derived Mesenchymal Stem Cells	H1_Derived_Mesenchymal_Stem_Cells	Class1	E006-H2BK5ac.tagAlign.gz	45000000	115	0.219196	35	0.206181	1500	0.196476	1.11563	2.34095	0.22	0.05	0.27	29.6	0.489
H2BK5ac	E007	ESDR.H1.NEUR.PROG	H1 Derived Neuronal Progenitor Cultured Cells	H1_Derived_Neuronal_Progenitor_Cultured_Cells	Class1	E007-H2BK5ac.tagAlign.gz	26047847	100	0.281544	35	0.274144	1500	0.258785	1.08794	1.48179	0.12	0.03	0.37	23.6	0.523
H2BK5ac	E008	ESC.H9	H9 Cell Line	H9_Cell_Line	Class1	E008-H2BK5ac.tagAlign.gz	45000000	100	0.387467	30	0.390613	1500	0.37474	1.03396	0.801836	0.1	0.02	0.25	21.3	0.556
H2BK5ac	E017	LNG.IMR90	IMR90 fetal lung fibroblasts Cell Line	IMR90_Cell_Line	Class1	E017-H2BK5ac.tagAlign.gz	45000000	125	0.385579	35	0.358411	1500	0.294225	1.31049	1.42328	0.52	0.49	0.59	71.2	0.816
H3K14ac	E003	ESC.H1	H1 Cell Line	H1_Cell_Line	Class1	E003-H3K14ac.tagAlign.gz	45000000	130	0.389019	30	0.391573	1500	0.375811	1.03514	0.837947	0.12	0.02	0.3	21.5	0.564
H3K14ac	E005	ESDR.H1.BMP4.TROP	H1 BMP4 Derived Trophoblast Cultured Cells	H1_BMP4_Derived_Trophoblast_Cultured_Cells	Class1	E005-H3K14ac.tagAlign.gz	45000000	140	0.436292	35	0.417403	1500	0.384709	1.13408	1.57776	0.37	0.32	0.53	69.3	0.828
H3K14ac	E006	ESDR.H1.MSC	H1 Derived Mesenchymal Stem Cells	H1_Derived_Mesenchymal_Stem_Cells	Class1	E006-H3K14ac.tagAlign.gz	45000000	125	0.33519	35	0.329164	1500	0.3129	1.07124	1.3705	0.24	0.12	0.38	41.4	0.691
H3K14ac	E007	ESDR.H1.NEUR.PROG	H1 Derived Neuronal Progenitor Cultured Cells	H1_Derived_Neuronal_Progenitor_Cultured_Cells	Class1	E007-H3K14ac.tagAlign.gz	35891806	125	0.323983	35	0.323261	1500	0.304821	1.06287	1.03917	0.09	0.02	0.38	29.2	0.647
H3K14ac	E008	ESC.H9	H9 Cell Line	H9_Cell_Line	Class1	E008-H3K14ac.tagAlign.gz	36335353	140	0.358168	35	0.348428	1500	0.331477	1.08052	1.57466	0.13	0.07	0.36	41.5	0.614
H3K14ac	E017	LNG.IMR90	IMR90 fetal lung fibroblasts Cell Line	IMR90_Cell_Line	Class1	E017-H3K14ac.tagAlign.gz	45000000	115	0.437953	45	0.419768	1500	0.389021	1.12578	1.59144	0.39	0.35	0.55	63.1	0.809
H3K18ac	E003	ESC.H1	H1 Cell Line	H1_Cell_Line	Class1	E003-H3K18ac.tagAlign.gz	27673445	110	0.292926	35	0.289344	1500	0.276292	1.0602	1.27449	0.14	0.08	0.32	49	0.699
H3K18ac	E004	ESDR.H1.BMP4.MESO	H1 BMP4 Derived Mesendoderm Cultured Cells	H1_BMP4_Derived_Mesendoderm_Cultured_Cells	Class1	E004-H3K18ac.tagAlign.gz	45000000	155	0.408096	35	0.402319	1500	0.383079	1.0653	1.30022	0.25	0.18	0.43	61.1	0.797
H3K18ac	E005	ESDR.H1.BMP4.TROP	H1 BMP4 Derived Trophoblast Cultured Cells	H1_BMP4_Derived_Trophoblast_Cultured_Cells	Class1	E005-H3K18ac.tagAlign.gz	45000000	135	0.43669	35	0.420343	1500	0.388322	1.12456	1.51053	0.38	0.36	0.55	65	0.852
H3K18ac	E006	ESDR.H1.MSC	H1 Derived Mesenchymal Stem Cells	H1_Derived_Mesenchymal_Stem_Cells	Class1	E006-H3K18ac.tagAlign.gz	45000000	130	0.37162	35	0.359272	1500	0.332256	1.11847	1.45708	0.36	0.28	0.47	68.3	0.837
H3K18ac	E007	ESDR.H1.NEUR.PROG	H1 Derived Neuronal Progenitor Cultured Cells	H1_Derived_Neuronal_Progenitor_Cultured_Cells	Class1	E007-H3K18ac.tagAlign.gz	45000000	115	0.404743	35	0.399265	1500	0.374475	1.08083	1.22096	0.29	0.2	0.48	47.4	0.754
H3K18ac	E008	ESC.H9	H9 Cell Line	H9_Cell_Line	Class1	E008-H3K18ac.tagAlign.gz	41790068	130	0.382891	30	0.375665	1500	0.356053	1.07538	1.36849	0.11	0.07	0.31	50.9	0.754
H3K18ac	E017	LNG.IMR90	IMR90 fetal lung fibroblasts Cell Line	IMR90_Cell_Line	Class1	E017-H3K18ac.tagAlign.gz	41442340	120	0.496982	45	0.44995	1500	0.38025	1.30699	1.6748	0.56	0.61	0.71	71.1	0.853
H3K23ac	E003	ESC.H1	H1 Cell Line	H1_Cell_Line	Class1	E003-H3K23ac.tagAlign.gz	45000000	135	0.385218	30	0.388306	1500	0.372711	1.03356	0.801978	0.11	0.01	0.27	15.2	0.534
H3K23ac	E004	ESDR.H1.BMP4.MESO	H1 BMP4 Derived Mesendoderm Cultured Cells	H1_BMP4_Derived_Mesendoderm_Cultured_Cells	Class1	E004-H3K23ac.tagAlign.gz	28451241	125	0.278369	35	0.277285	1500	0.267713	1.0398	1.11321	0.06	0.01	0.23	19.8	0.521
H3K23ac	E005	ESDR.H1.BMP4.TROP	H1 BMP4 Derived Trophoblast Cultured Cells	H1_BMP4_Derived_Trophoblast_Cultured_Cells	Class1	E005-H3K23ac.tagAlign.gz	45000000	115	0.379064	35	0.381183	1500	0.365895	1.03599	0.861406	0.12	0.02	0.27	4.5	0.344
H3K23ac	E006	ESDR.H1.MSC	H1 Derived Mesenchymal Stem Cells	H1_Derived_Mesenchymal_Stem_Cells	Class1	E006-H3K23ac.tagAlign.gz	45000000	115	0.21903	35	0.216886	1500	0.204405	1.07155	1.17183	0.31	0.08	0.39	28.6	0.608
H3K23ac	E007	ESDR.H1.NEUR.PROG	H1 Derived Neuronal Progenitor Cultured Cells	H1_Derived_Neuronal_Progenitor_Cultured_Cells	Class1	E007-H3K23ac.tagAlign.gz	45000000	95	0.367286	35	0.364142	1500	0.342204	1.07329	1.14327	0.26	0.15	0.44	26.4	0.592
H3K23ac	E008	ESC.H9	H9 Cell Line	H9_Cell_Line	Class1	E008-H3K23ac.tagAlign.gz	32531021	90	0.317423	30	0.317454	1500	0.303242	1.04677	0.997793	0.05	0.01	0.15	11.8	0.394
H3K23ac	E017	LNG.IMR90	IMR90 fetal lung fibroblasts Cell Line	IMR90_Cell_Line	Class1	E017-H3K23ac.tagAlign.gz	45000000	120	0.427175	45	0.410205	1500	0.387597	1.10211	1.75066	0.34	0.29	0.51	57.8	0.719
H3K23me2	E003	ESC.H1	H1 Cell Line	H1_Cell_Line	Class1	E003-H3K23me2.tagAlign.gz	37011102	110	0.347347	35	0.359276	1500	0.329174	1.05521	0.603717	0.08	0.04	0.15	32.9	0.322
H3K23me2	E008	ESC.H9	H9 Cell Line	H9_Cell_Line	Class1	E008-H3K23me2.tagAlign.gz	45000000	120	0.253107	35	0.241738	1500	0.228225	1.10902	1.84142	0.26	0.11	0.37	28.1	0.423
H3K27ac	E003	ESC.H1	H1 Cell Line	H1_Cell_Line	Core	E003-H3K27ac.tagAlign.gz	21502554	110	0.279856	30	0.262376	1500	0.229185	1.22109	1.52665	0.257	0.23	0.358	59	0.744
H3K27ac	E004	ESDR.H1.BMP4.MESO	H1 BMP4 Derived Mesendoderm Cultured Cells	H1_BMP4_Derived_Mesendoderm_Cultured_Cells	Core	E004-H3K27ac.tagAlign.gz	30000000	140	0.34497	35	0.334049	1500	0.295261	1.16836	1.28155	0.244	0.226	0.352	52.1	0.704
H3K27ac	E005	ESDR.H1.BMP4.TROP	H1 BMP4 Derived Trophoblast Cultured Cells	H1_BMP4_Derived_Trophoblast_Cultured_Cells	Core	E005-H3K27ac.tagAlign.gz	30000000	145	0.343868	35	0.340239	1500	0.297166	1.15716	1.08425	0.233	0.22	0.341	46.4	0.592
H3K27ac	E006	ESDR.H1.MSC	H1 Derived Mesenchymal Stem Cells	H1_Derived_Mesenchymal_Stem_Cells	Core	E006-H3K27ac.tagAlign.gz	30000000	130	0.349009	35	0.335881	1500	0.295757	1.18006	1.3272	0.251	0.239	0.325	41.2	0.507
H3K27ac	E007	ESDR.H1.NEUR.PROG	H1 Derived Neuronal Progenitor Cultured Cells	H1_Derived_Neuronal_Progenitor_Cultured_Cells	Core	E007-H3K27ac.tagAlign.gz	30000000	135	0.307511	35	0.309071	1500	0.287373	1.07008	0.928106	0.098	0.075	0.175	34.8	0.585
H3K27ac	E008	ESC.H9	H9 Cell Line	H9_Cell_Line	Core	E008-H3K27ac.tagAlign.gz	30000000	90	0.309142	30	0.307063	1500	0.284868	1.08521	1.09366	0.099	0.063	0.196	32.1	0.546
H3K27ac	E011	ESDR.CD184.ENDO	hESC Derived CD184+ Endoderm Cultured Cells	hESC_Derived_CD184+_Endoderm_Cultured_Cells	Core	E011-H3K27ac.tagAlign.gz	30000000	190	0.345465	35	0.330853	1500	0.300238	1.15064	1.47729	0.166	0.131	0.308	41.7	0.609
H3K27ac	E012	ESDR.CD56.ECTO	hESC Derived CD56+ Ectoderm Cultured Cells	hESC_Derived_CD56+_Ectoderm_Cultured_Cells	Core	E012-H3K27ac.tagAlign.gz	17645625	195	0.254401	35	0.241445	1500	0.214864	1.18401	1.48738	0.171	0.123	0.327	45.9	0.703
H3K27ac	E013	ESDR.CD56.MESO	hESC Derived CD56+ Mesoderm Cultured Cells	hESC_Derived_CD56+_Mesoderm_Cultured_Cells	Core	E013-H3K27ac.tagAlign.gz	30000000	215	0.393599	35	0.365997	1500	0.306291	1.28505	1.4623	0	0.238	0.385	47.8	0.64
H3K27ac	E014	ESC.HUES48	HUES48 Cell Line	HUES48_Cell_Line	Core	E014-H3K27ac.tagAlign.gz	18731798	170	0.369307	45	0.322308	1500	0.219802	1.68018	1.4585	0.474	0.461	0.547	71.3	0.894
H3K27ac	E015	ESC.HUES6	HUES6 Cell Line	HUES6_Cell_Line	Core	E015-H3K27ac.tagAlign.gz	30000000	210	0.309653	35	0.305757	1500	0.291204	1.06336	1.2677	0.126	0.093	0.241	58.8	0.777
H3K27ac	E016	ESC.HUES64	HUES64 Cell Line	HUES64_Cell_Line	Core	E016-H3K27ac.tagAlign.gz	30000000	175	0.352295	35	0.334541	1500	0.292773	1.20331	1.42505	0.215	0.194	0.315	71.3	0.884
H3K27ac	E017	LNG.IMR90	IMR90 fetal lung fibroblasts Cell Line	IMR90_Cell_Line	Core	E017-H3K27ac.tagAlign.gz	30000000	130	0.572157	45	0.471386	1500	0.294247	1.94448	1.56888	0.708	0.735	0.779	66.4	0.789
H3K27ac	E019	IPSC.18	iPS-18 Cell Line	iPS-18_Cell_Line	Core	E019-H3K27ac.tagAlign.gz	30000000	205	0.300688	35	0.299364	1500	0.292411	1.02831	1.19042	0.066	0.031	0.159	51.4	0.72
H3K27ac	E020	IPSC.20B	iPS-20b Cell Line	iPS-20b_Cell_Line	Core	E020-H3K27ac.tagAlign.gz	22466820	240	0.247008	35	0.246424	1500	0.238772	1.03449	1.07622	0.111	0.063	0.245	58.8	0.771
H3K27ac	E021	IPSC.DF.6.9	iPS DF 6.9 Cell Line	iPS_DF_6.9_Cell_Line	Core	E021-H3K27ac.tagAlign.gz	27113934	90	0.288017	35	0.286004	1500	0.272934	1.05526	1.15402	0.071	0.026	0.218	16.8	0.304
H3K27ac	E022	IPSC.DF.19.11	iPS DF 19.11 Cell Line	iPS_DF_19.11_Cell_Line	Core	E022-H3K27ac.tagAlign.gz	30000000	120	0.314001	35	0.309542	1500	0.292164	1.07474	1.2566	0.116	0.08	0.263	46.2	0.725
H3K27ac	E026	STRM.MRW.MSC	Bone Marrow Derived Cultured Mesenchymal Stem Cells	Bone_Marrow_Derived_Mesenchymal_Stem_Cell_Cultured_Cells	Core	E026-H3K27ac.tagAlign.gz	30000000	255	0.537922	45	0.452634	1500	0.318534	1.68874	1.63601	0.705	0.728	0.763	68.7	0.836
H3K27ac	E029	BLD.CD14.PC	Primary monocytes from peripheral blood	CD14_Primary_Cells	Core	E029-H3K27ac.tagAlign.gz	21286511	220	0.486913	40	0.409886	1500	0.26434	1.842	1.52922	0.481	0.476	0.529	69.1	0.735
H3K27ac	E032	BLD.CD19.PPC	Primary B cells from peripheral blood	CD19_Primary_Cells_Peripheral_UW	Core	E032-H3K27ac.tagAlign.gz	21597113	175	0.389061	35	0.355486	1500	0.254368	1.52952	1.33204	0.348	0.348	0.391	67.3	0.734
H3K27ac	E034	BLD.CD3.PPC	Primary T cells from peripheral blood	CD3_Primary_Cells_Peripheral_UW	Core	E034-H3K27ac.tagAlign.gz	30000000	180	0.414988	35	0.393655	1500	0.317493	1.30708	1.28009	0.315	0.323	0.38	74.6	0.836
H3K27ac	E037	BLD.CD4.MPC	Primary T helper memory cells from peripheral blood 2	CD4_Memory_Primary_Cells	Core	E037-H3K27ac.tagAlign.gz	27666693	235	0.385112	35	0.356265	1500	0.285997	1.34656	1.41053	0.313	0.306	0.386	71.2	0.877
H3K27ac	E038	BLD.CD4.NPC	Primary T helper naive cells from peripheral blood	CD4_Naive_Primary_Cells	Core	E038-H3K27ac.tagAlign.gz	11693164	245	0.249651	35	0.212402	1500	0.148137	1.68527	1.57963	0.345	0.303	0.372	76	0.858
H3K27ac	E039	BLD.CD4.CD25M.CD45RA.NPC	Primary T helper naive cells from peripheral blood	CD4+_CD25-_CD45RA+_Naive_Primary_Cells	Core	E039-H3K27ac.tagAlign.gz	13028034	210	0.365904	40	0.314911	1500	0.216096	1.69324	1.51605	0.559	0.566	0.624	80.4	0.899
H3K27ac	E040	BLD.CD4.CD25M.CD45RO.MPC	Primary T helper memory cells from peripheral blood 1	CD4+_CD25-_CD45RO+_Memory_Primary_Cells	Core	E040-H3K27ac.tagAlign.gz	8607710	270	0.197697	35	0.177666	1500	0.138376	1.4287	1.50984	0.421	0.39	0.46	81.5	0.891
H3K27ac	E041	BLD.CD4.CD25M.IL17M.PL.TPC	Primary T helper cells PMA-I stimulated	CD4+_CD25-_IL17-_PMA-Ionomycin_stimulated_MACS_purified_Th_Primary_Cells	Core	E041-H3K27ac.tagAlign.gz	30000000	250	0.451423	35	0.413359	1500	0.329652	1.36939	1.45473	0.44	0.471	0.562	81	0.879
H3K27ac	E042	BLD.CD4.CD25M.IL17P.PL.TPC	Primary T helper 17 cells PMA-I stimulated	CD4+_CD25-_IL17+_PMA-Ionomcyin_stimulated_Th17_Primary_Cells	Core	E042-H3K27ac.tagAlign.gz	18697770	205	0.388353	35	0.336134	1500	0.23317	1.66553	1.50716	0.432	0.433	0.486	79.5	0.848
H3K27ac	E043	BLD.CD4.CD25M.TPC	Primary T helper cells from peripheral blood	CD4+_CD25-_Th_Primary_Cells	Core	E043-H3K27ac.tagAlign.gz	16749018	235	0.219972	35	0.216052	1500	0.196121	1.12161	1.19666	0.194	0.172	0.259	75.4	0.822
H3K27ac	E044	BLD.CD4.CD25.CD127M.TREGPC	Primary T regulatory cells from peripheral blood	CD4+_CD25+_CD127-_Treg_Primary_Cells	Core	E044-H3K27ac.tagAlign.gz	8349932	225	0.321299	40	0.269608	1500	0.175824	1.82739	1.55117	0.646	0.651	0.71	77	0.851
H3K27ac	E045	BLD.CD4.CD25I.CD127.TMEMPC	Primary T cells effector/memory enriched from peripheral blood	CD4+_CD25int_CD127+_Tmem_Primary_Cells	Core	E045-H3K27ac.tagAlign.gz	16066464	200	0.300566	35	0.272854	1500	0.206932	1.45249	1.42037	0.356	0.347	0.408	82.9	0.917
H3K27ac	E046	BLD.CD56.PC	Primary Natural Killer cells from peripheral blood	CD56_Primary_Cells	Core	E046-H3K27ac.tagAlign.gz	26447569	175	0.501443	40	0.455786	1500	0.304355	1.64756	1.3015	0.473	0.484	0.524	74.4	0.877
H3K27ac	E047	BLD.CD8.NPC	Primary T killer naive cells from peripheral blood	CD8_Naive_Primary_Cells	Core	E047-H3K27ac.tagAlign.gz	30000000	235	0.374353	35	0.347321	1500	0.2883	1.29848	1.458	0.209	0.204	0.262	77.9	0.871
H3K27ac	E048	BLD.CD8.MPC	Primary T killer memory cells from peripheral blood	CD8_Memory_Primary_Cells	Core	E048-H3K27ac.tagAlign.gz	13923505	250	0.2169	35	0.203922	1500	0.174556	1.24259	1.44198	0.286	0.249	0.341	65.7	0.857
H3K27ac	E049	STRM.CHON.MRW.DR.MSC	Mesenchymal Stem Cell Derived Chondrocyte Cultured Cells	Chondrocytes_from_Bone_Marrow_Derived_Mesenchymal_Stem_Cell_Cultured_Cells	Core	E049-H3K27ac.tagAlign.gz	30000000	265	0.490896	45	0.414136	1500	0.31345	1.56611	1.76237	0.614	0.646	0.702	65.3	0.798
H3K27ac	E050	BLD.MOB.CD34.PC.F	Primary hematopoietic stem cells G-CSF-mobilized Female	Mobilized_CD34_Primary_Cells_Female	Core	E050-H3K27ac.tagAlign.gz	27469261	225	0.360918	35	0.332293	1500	0.272372	1.32509	1.47772	0.251	0.237	0.337	60.8	0.729
H3K27ac	E055	SKIN.PEN.FRSK.FIB.01	Foreskin Fibroblast Primary Cells skin01	Penis_Foreskin_Fibroblast_Primary_Cells_skin01	Core	E055-H3K27ac.tagAlign.gz	27122965	160	0.359458	45	0.318836	1500	0.28327	1.26896	2.14213	0.266	0.242	0.418	69.2	0.85
H3K27ac	E056	SKIN.PEN.FRSK.FIB.02	Foreskin Fibroblast Primary Cells skin02	Penis_Foreskin_Fibroblast_Primary_Cells_skin02	Core	E056-H3K27ac.tagAlign.gz	28351221	155	0.340302	35	0.308032	1500	0.286744	1.18678	2.51589	0.184	0.155	0.352	65.4	0.839
H3K27ac	E058	SKIN.PEN.FRSK.KER.03	Foreskin Keratinocyte Primary Cells skin03	Penis_Foreskin_Keratinocyte_Primary_Cells_skin03	Core	E058-H3K27ac.tagAlign.gz	30000000	180	0.336235	35	0.323263	1500	0.302318	1.11219	1.6193	0.206	0.186	0.339	69.3	0.83
H3K27ac	E059	SKIN.PEN.FRSK.MEL.01	Foreskin Melanocyte Primary Cells skin01	Penis_Foreskin_Melanocyte_Primary_Cells_skin01	Core	E059-H3K27ac.tagAlign.gz	30000000	140	0.326852	35	0.304741	1500	0.293551	1.11344	2.97617	0.108	0.071	0.273	44	0.641
H3K27ac	E061	SKIN.PEN.FRSK.MEL.03	Foreskin Melanocyte Primary Cells skin03	Penis_Foreskin_Melanocyte_Primary_Cells_skin03	Core	E061-H3K27ac.tagAlign.gz	30000000	155	0.357128	45	0.334409	1500	0.303755	1.17571	1.7411	0.237	0.219	0.391	60.2	0.781
H3K27ac	E062	BLD.PER.MONUC.PC	Primary mononuclear cells from peripheral blood	Peripheral_Blood_Mononuclear_Primary_Cells	Core	E062-H3K27ac.tagAlign.gz	30000000	180	0.302049	35	0.302385	1500	0.293011	1.03085	0.964179	0.087	0.063	0.178	59.2	0.746
H3K27ac	E063	FAT.ADIP.NUC	Adipose Nuclei	Adipose_Nuclei	Core	E063-H3K27ac.tagAlign.gz	16568068	290	0.255599	35	0.243395	1500	0.217484	1.17526	1.47102	0.435	0.441	0.546	56.5	0.765
H3K27ac	E065	HRT.AOR	Aorta	Aorta	Core	E065-H3K27ac.tagAlign.gz	21179493	130	0.349288	35	0.31689	1500	0.259691	1.34501	1.56641	0.457	0.451	0.543	50.5	0.657
H3K27ac	E066	LIV.ADLT	Liver	Adult_Liver	Core	E066-H3K27ac.tagAlign.gz	30000000	230	0.420457	35	0.388925	1500	0.317438	1.32453	1.44108	0.458	0.471	0.553	57.5	0.789
H3K27ac	E067	BRN.ANG.GYR	Brain Angular Gyrus	Brain_Angular_Gyrus	Core	E067-H3K27ac.tagAlign.gz	30000000	215	0.323686	35	0.319941	1500	0.304303	1.0637	1.2395	0.211	0.191	0.399	72	0.889
H3K27ac	E068	BRN.ANT.CAUD	Brain Anterior Caudate	Brain_Anterior_Caudate	Core	E068-H3K27ac.tagAlign.gz	30000000	190	0.337509	35	0.330468	1500	0.30912	1.09184	1.32984	0.276	0.27	0.465	74.2	0.906
H3K27ac	E069	BRN.CING.GYR	Brain Cingulate Gyrus	Brain_Cingulate_Gyrus	Core	E069-H3K27ac.tagAlign.gz	30000000	220	0.325124	35	0.32178	1500	0.306312	1.06142	1.21622	0.216	0.199	0.4	75.5	0.904
H3K27ac	E071	BRN.HIPP.MID	Brain Hippocampus Middle	Brain_Hippocampus_Middle	Core	E071-H3K27ac.tagAlign.gz	30000000	240	0.371911	35	0.354926	1500	0.318195	1.16881	1.46244	0.351	0.359	0.504	78.9	0.907
H3K27ac	E072	BRN.INF.TMP	Brain Inferior Temporal Lobe	Brain_Inferior_Temporal_Lobe	Core	E072-H3K27ac.tagAlign.gz	30000000	255	0.327073	35	0.32407	1500	0.306931	1.06562	1.17523	0.228	0.213	0.425	71.2	0.863
H3K27ac	E073	BRN.DL.PRFRNTL.CRTX	Brain_Dorsolateral_Prefrontal_Cortex	Brain_Mid_Frontal_Lobe	Core	E073-H3K27ac.tagAlign.gz	30000000	195	0.318814	35	0.316868	1500	0.302978	1.05227	1.14011	0.185	0.156	0.379	70.9	0.885
H3K27ac	E074	BRN.SUB.NIG	Brain Substantia Nigra	Brain_Substantia_Nigra	Core	E074-H3K27ac.tagAlign.gz	30000000	200	0.348501	35	0.339628	1500	0.314472	1.10821	1.3527	0.284	0.292	0.435	75.3	0.887
H3K27ac	E075	GI.CLN.MUC	Colonic Mucosa	Colonic_Mucosa	Core	E075-H3K27ac.tagAlign.gz	16157458	165	0.270437	35	0.251169	1500	0.207449	1.30363	1.4407	0.411	0.398	0.494	74.3	0.903
H3K27ac	E076	GI.CLN.SM.MUS	Colon Smooth Muscle	Colon_Smooth_Muscle	Core	E076-H3K27ac.tagAlign.gz	13712553	185	0.200216	35	0.194092	1500	0.177709	1.12665	1.37375	0.348	0.335	0.462	68.6	0.812
H3K27ac	E078	GI.DUO.SM.MUS	Duodenum Smooth Muscle	Duodenum_Smooth_Muscle	Core	E078-H3K27ac.tagAlign.gz	30000000	250	0.307317	35	0.30399	1500	0.287891	1.06748	1.20668	0.188	0.15	0.301	64.4	0.803
H3K27ac	E079	GI.ESO	Esophagus	Esophagus	Core	E079-H3K27ac.tagAlign.gz	19678792	145	0.319115	35	0.301331	1500	0.240952	1.32439	1.29454	0.451	0.449	0.544	62.3	0.838
H3K27ac	E080	ADRL.GLND.FET	Fetal Adrenal Gland	Fetal_Adrenal_Gland	Core	E080-H3K27ac.tagAlign.gz	19509171	185	0.314178	35	0.298639	1500	0.239716	1.31062	1.26371	0.493	0.501	0.584	48.8	0.732
H3K27ac	E084	GI.L.INT.FET	Fetal Intestine Large	Fetal_Intestine_Large	Core	E084-H3K27ac.tagAlign.gz	28573947	170	0.487244	40	0.453374	1500	0.334743	1.45558	1.2855	0.608	0.622	0.668	73.3	0.879
H3K27ac	E085	GI.S.INT.FET	Fetal Intestine Small	Fetal_Intestine_Small	Core	E085-H3K27ac.tagAlign.gz	29678351	160	0.484698	45	0.451144	1500	0.332606	1.45727	1.28306	0.555	0.562	0.618	79	0.917
H3K27ac	E087	PANC.ISLT	Pancreatic Islets	Pancreatic_Islets	Core	E087-H3K27ac.tagAlign.gz	16662142	165	0.22244	40	0.219024	1500	0.200707	1.10828	1.18655	0.263	0.241	0.415	47.4	0.687
H3K27ac	E089	MUS.TRNK.FET	Fetal Muscle Trunk	Fetal_Muscle_Trunk	Core	E089-H3K27ac.tagAlign.gz	17469992	195	0.261346	35	0.247734	1500	0.205935	1.26907	1.32566	0.322	0.299	0.394	61.9	0.82
H3K27ac	E090	MUS.LEG.FET	Fetal Muscle Leg	Fetal_Muscle_Leg	Core	E090-H3K27ac.tagAlign.gz	26085199	160	0.408609	45	0.377873	1500	0.288548	1.41609	1.34408	0.479	0.483	0.563	67.6	0.882
H3K27ac	E091	PLCNT.FET	Placenta	Fetal_Placenta	Core	E091-H3K27ac.tagAlign.gz	21617660	200	0.315809	35	0.304011	1500	0.261851	1.20606	1.27984	0.419	0.424	0.505	44.2	0.681
H3K27ac	E092	GI.STMC.FET	Fetal Stomach	Fetal_Stomach	Core	E092-H3K27ac.tagAlign.gz	30000000	185	0.49864	45	0.445718	1500	0.321142	1.55271	1.42482	0.537	0.54	0.607	67.7	0.879
H3K27ac	E093	THYM.FET	Fetal Thymus	Fetal_Thymus	Core	E093-H3K27ac.tagAlign.gz	30000000	160	0.404593	35	0.391118	1500	0.315752	1.28136	1.1788	0.307	0.297	0.378	61.4	0.685
H3K27ac	E094	GI.STMC.GAST	Gastric	Gastric	Core	E094-H3K27ac.tagAlign.gz	16801250	175	0.230319	35	0.226227	1500	0.19868	1.15925	1.14854	0.255	0.217	0.341	61.9	0.832
H3K27ac	E095	HRT.VENT.L	Left Ventricle	Left_Ventricle	Core	E095-H3K27ac.tagAlign.gz	30000000	160	0.495204	45	0.43582	1500	0.317511	1.55964	1.50193	0.559	0.579	0.642	70.7	0.887
H3K27ac	E096	LNG	Lung	Lung	Core	E096-H3K27ac.tagAlign.gz	29491686	130	0.408623	45	0.376199	1500	0.304974	1.33986	1.45523	0.388	0.374	0.521	67	0.881
H3K27ac	E097	OVRY	Ovary	Ovary	Core	E097-H3K27ac.tagAlign.gz	16591070	100	0.273543	40	0.262247	1500	0.206577	1.32417	1.2029	0.403	0.375	0.499	42.1	0.519
H3K27ac	E098	PANC	Pancreas	Pancreas	Core	E098-H3K27ac.tagAlign.gz	11995712	150	0.174692	35	0.174055	1500	0.149986	1.16473	1.02647	0.268	0.212	0.347	55.4	0.763
H3K27ac	E099	PLCNT.AMN	Placenta Amnion	Placenta_Amnion	Core	E099-H3K27ac.tagAlign.gz	25933896	210	0.270716	35	0.270746	1500	0.266408	1.01617	0.993184	0.052	0.003	0.22	33.4	0.466
H3K27ac	E100	MUS.PSOAS	Psoas Muscle	Psoas_Muscle	Core	E100-H3K27ac.tagAlign.gz	15780458	125	0.336132	45	0.300005	1500	0.205053	1.63924	1.38049	0.519	0.512	0.597	64	0.815
H3K27ac	E101	GI.RECT.MUC.29	Rectal Mucosa Donor 29	Rectal_Mucosa.Donor_29	Core	E101-H3K27ac.tagAlign.gz	17742431	195	0.313769	35	0.287393	1500	0.2273	1.38042	1.43894	0.456	0.447	0.528	77.4	0.913
H3K27ac	E102	GI.RECT.MUC.31	Rectal Mucosa Donor 31	Rectal_Mucosa.Donor_31	Core	E102-H3K27ac.tagAlign.gz	15885968	180	0.359906	40	0.316144	1500	0.22719	1.58417	1.49196	0.577	0.582	0.636	75.6	0.891
H3K27ac	E103	GI.RECT.SM.MUS	Rectal Smooth Muscle	Rectal_Smooth_Muscle	Core	E103-H3K27ac.tagAlign.gz	18644022	175	0.315554	35	0.292124	1500	0.239551	1.31727	1.44567	0.421	0.423	0.5	70.4	0.863
H3K27ac	E104	HRT.ATR.R	Right Atrium	Right_Atrium	Core	E104-H3K27ac.tagAlign.gz	24618650	140	0.382184	45	0.349165	1500	0.281663	1.35689	1.48916	0.456	0.459	0.552	69.4	0.878
H3K27ac	E105	HRT.VNT.R	Right Ventricle	Right_Ventricle	Core	E105-H3K27ac.tagAlign.gz	10326840	105	0.286561	45	0.257286	1500	0.158221	1.81114	1.29552	0.609	0.59	0.651	65.4	0.818
H3K27ac	E106	GI.CLN.SIG	Sigmoid Colon	Sigmoid_Colon	Core	E106-H3K27ac.tagAlign.gz	30000000	140	0.414833	40	0.386605	1500	0.310907	1.33427	1.37291	0.432	0.43	0.528	74.5	0.899
H3K27ac	E108	MUS.SKLT.F	Skeletal Muscle Female	Skeletal_Muscle_Female	Core	E108-H3K27ac.tagAlign.gz	18923998	275	0.353693	35	0.315452	1500	0.254738	1.38845	1.62986	0.516	0.522	0.606	63.8	0.787
H3K27ac	E109	GI.S.INT	Small Intestine	Small_Intestine	Core	E109-H3K27ac.tagAlign.gz	30000000	130	0.455563	45	0.420311	1500	0.317278	1.43585	1.34214	0.482	0.485	0.582	73.3	0.912
H3K27ac	E111	GI.STMC.MUS	Stomach Smooth Muscle	Stomach_Smooth_Muscle	Core	E111-H3K27ac.tagAlign.gz	22192107	255	0.281778	35	0.27471	1500	0.251802	1.11905	1.30853	0.256	0.245	0.352	69.6	0.838
H3K27ac	E112	THYM	Thymus	Thymus	Core	E112-H3K27ac.tagAlign.gz	16921101	120	0.260634	45	0.250326	1500	0.20461	1.27381	1.22547	0.32	0.284	0.414	65.1	0.819
H3K27ac	E113	SPLN	Spleen	Spleen	Core	E113-H3K27ac.tagAlign.gz	16906533	175	0.351236	35	0.326383	1500	0.222024	1.58197	1.23814	0.499	0.496	0.568	62.8	0.843
H3K27ac	E114	LNG.A549.ETOH002.CNCR	A549 EtOH 0.02pct Lung Carcinoma Cell Line	A549_EtOH_0.02pct_Lung_Carcinoma	Core	E114-H3K27ac.tagAlign.gz	30000000	255	0.499781	35	0.471819	1500	0.372101	1.34313	1.28041	0.535	0.552	0.598	62.9	0.719
H3K27ac	E115	BLD.DND41.CNCR	Dnd41 TCell Leukemia Cell Line	Dnd41_TCell_Leukemia	Core	E115-H3K27ac.tagAlign.gz	30000000	165	0.390093	35	0.38031	1500	0.330278	1.18111	1.19554	0.326	0.329	0.433	66.8	0.713
H3K27ac	E116	BLD.GM12878	GM12878 Lymphoblastoid Cell Line	GM12878_Lymphoblastoid	Core	E116-H3K27ac.tagAlign.gz	16702604	185	0.35197	35	0.333653	1500	0.25052	1.40496	1.22032	0.584	0.592	0.634	62.6	0.734
H3K27ac	E117	CRVX.HELAS3.CNCR	HeLa-S3 Cervical Carcinoma Cell Line	HeLa-S3_Cervical_Carcinoma	Core	E117-H3K27ac.tagAlign.gz	30000000	215	0.516764	35	0.46945	1500	0.325239	1.58888	1.32809	0.483	0.488	0.529	65.5	0.771
H3K27ac	E118	LIV.HEPG2.CNCR	HepG2 Hepatocellular Carcinoma Cell Line	HepG2_Hepatocellular_Carcinoma	Core	E118-H3K27ac.tagAlign.gz	12391189	185	0.375622	40	0.336876	1500	0.22087	1.70064	1.334	0.639	0.634	0.682	56.3	0.629
H3K27ac	E119	BRST.HMEC	HMEC Mammary Epithelial Primary Cells	HMEC_Mammary_Epithelial	Core	E119-H3K27ac.tagAlign.gz	19799387	180	0.360335	35	0.337675	1500	0.252577	1.42663	1.26628	0.5	0.503	0.556	71.9	0.804
H3K27ac	E120	MUS.HSMM	HSMM Skeletal Muscle Myoblasts Cell Line	HSMM_Skeletal_Muscle_Myoblasts	Core	E120-H3K27ac.tagAlign.gz	21768173	175	0.415393	45	0.378611	1500	0.265112	1.56686	1.32407	0.545	0.549	0.594	71.3	0.822
H3K27ac	E121	MUS.HSMMT	HSMM cell derived Skeletal Muscle Myotubes Cell Line	HSMMtube_Skeletal_Muscle_Myotubes_Derived_from_HSMM	Core	E121-H3K27ac.tagAlign.gz	14620019	210	0.326711	35	0.295486	1500	0.216272	1.51065	1.39419	0.671	0.684	0.73	61.7	0.785
H3K27ac	E122	VAS.HUVEC	HUVEC Umbilical Vein Endothelial Cells Cell Line	HUVEC_Umbilical_Vein_Endothelial_Cells	Core	E122-H3K27ac.tagAlign.gz	23263030	215	0.482082	40	0.433595	1500	0.297152	1.62234	1.35536	0.609	0.622	0.653	60.4	0.72
H3K27ac	E123	BLD.K562.CNCR	K562 Leukemia Cell Line	K562_Leukemia	Core	E123-H3K27ac.tagAlign.gz	18512078	165	0.404049	35	0.357904	1500	0.247712	1.63113	1.41877	0.497	0.486	0.546	62.7	0.747
H3K27ac	E124	BLD.CD14.MONO	Monocytes-CD14+ RO01746 Cell Line	Monocytes-CD14+_RO01746	Core	E124-H3K27ac.tagAlign.gz	30000000	240	0.422599	40	0.399503	1500	0.32809	1.28806	1.32342	0.448	0.469	0.601	73	0.857
H3K27ac	E125	BRN.NHA	NH-A Astrocytes Cell Line	NH-A_Astrocytes	Core	E125-H3K27ac.tagAlign.gz	21925355	175	0.397041	40	0.366811	1500	0.264907	1.49879	1.29665	0.529	0.535	0.592	71.7	0.848
H3K27ac	E126	SKIN.NHDFAD	NHDF-Ad Adult Dermal Fibroblast Primary Cells	NHDF-Ad_Adult_Dermal_Fibroblasts	Core	E126-H3K27ac.tagAlign.gz	30000000	160	0.366806	40	0.350659	1500	0.308137	1.1904	1.37975	0.303	0.302	0.319	62.3	0.769
H3K27ac	E127	SKIN.NHEK	NHEK-Epidermal Keratinocyte Primary Cells	NHEK-Epidermal_Keratinocytes	Core	E127-H3K27ac.tagAlign.gz	22517166	185	0.457422	45	0.417671	1500	0.288423	1.58594	1.30756	0.622	0.635	0.671	74.5	0.851
H3K27ac	E128	LNG.NHLF	NHLF Lung Fibroblast Primary Cells	NHLF_Lung_Fibroblasts	Core	E128-H3K27ac.tagAlign.gz	15453737	200	0.32419	45	0.294924	1500	0.215319	1.50562	1.36765	0.537	0.535	0.601	75.3	0.898
H3K27ac	E129	BONE.OSTEO	Osteoblast Primary Cells	Osteoblasts	Core	E129-H3K27ac.tagAlign.gz	30000000	200	0.397047	35	0.380999	1500	0.324829	1.22233	1.28571	0.451	0.467	0.57	71.5	0.855
H3K27me3	E001	ESC.I3	ES-I3 Cell Line	ES-I3_Cell_Line	Core	E001-H3K27me3.tagAlign.gz	18992710	185	0.27271	35	0.267073	1500	0.24679	1.10503	1.27792	0.276	0.256	0.381	71.3	0.78
H3K27me3	E002	ESC.WA7	ES-WA7 Cell Line	ES-WA7_Cell_Line	Core	E002-H3K27me3.tagAlign.gz	13246745	155	0.184033	35	0.181025	1500	0.168298	1.0935	1.23634	0.251	0.198	0.4	53.2	0.711
H3K27me3	E003	ESC.H1	H1 Cell Line	H1_Cell_Line	Core	E003-H3K27me3.tagAlign.gz	30000000	115	0.414784	35	0.401676	1500	0.353563	1.17315	1.27246	0.288	0.278	0.37	75.5	0.804
H3K27me3	E004	ESDR.H1.BMP4.MESO	H1 BMP4 Derived Mesendoderm Cultured Cells	H1_BMP4_Derived_Mesendoderm_Cultured_Cells	Core	E004-H3K27me3.tagAlign.gz	30000000	130	0.316154	35	0.314284	1500	0.301922	1.04714	1.15125	0.117	0.096	0.218	56.6	0.76
H3K27me3	E005	ESDR.H1.BMP4.TROP	H1 BMP4 Derived Trophoblast Cultured Cells	H1_BMP4_Derived_Trophoblast_Cultured_Cells	Core	E005-H3K27me3.tagAlign.gz	30000000	130	0.304449	35	0.313822	1500	0.29337	1.03776	0.54168	0.077	0.052	0.221	38.7	0.622
H3K27me3	E006	ESDR.H1.MSC	H1 Derived Mesenchymal Stem Cells	H1_Derived_Mesenchymal_Stem_Cells	Core	E006-H3K27me3.tagAlign.gz	30000000	120	0.309013	35	0.306077	1500	0.297083	1.04016	1.32648	0.097	0.038	0.322	33.3	0.55
H3K27me3	E007	ESDR.H1.NEUR.PROG	H1 Derived Neuronal Progenitor Cultured Cells	H1_Derived_Neuronal_Progenitor_Cultured_Cells	Core	E007-H3K27me3.tagAlign.gz	30000000	155	0.293462	35	0.300383	1500	0.286084	1.02579	0.516025	0.037	0.018	0.108	23	0.391
H3K27me3	E008	ESC.H9	H9 Cell Line	H9_Cell_Line	Core	E008-H3K27me3.tagAlign.gz	30000000	135	0.30765	35	0.31091	1500	0.294531	1.04454	0.800921	0.083	0.065	0.158	48.7	0.702
H3K27me3	E009	ESDR.H9.NEUR.PROG	H9 Derived Neuronal Progenitor Cultured Cells	H9_Derived_Neuronal_Progenitor_Cultured_Cells	Core	E009-H3K27me3.tagAlign.gz	30000000	185	0.313273	35	0.311583	1500	0.303599	1.03187	1.21169	0.125	0.095	0.362	50.2	0.705
H3K27me3	E010	ESDR.H9.NEUR	H9 Derived Neuron Cultured Cells	H9_Derived_Neuron_Cultured_Cells	Core	E010-H3K27me3.tagAlign.gz	29590040	155	0.311698	35	0.313234	1500	0.302144	1.03162	0.861536	0.14	0.104	0.417	43.8	0.638
H3K27me3	E011	ESDR.CD184.ENDO	hESC Derived CD184+ Endoderm Cultured Cells	hESC_Derived_CD184+_Endoderm_Cultured_Cells	Core	E011-H3K27me3.tagAlign.gz	30000000	310	0.340017	35	0.34069	1500	0.322404	1.05463	0.963164	0.22	0.199	0.367	57	0.745
H3K27me3	E012	ESDR.CD56.ECTO	hESC Derived CD56+ Ectoderm Cultured Cells	hESC_Derived_CD56+_Ectoderm_Cultured_Cells	Core	E012-H3K27me3.tagAlign.gz	18532506	195	0.339511	35	0.33971	1500	0.302987	1.12055	0.994572	0.372	0.363	0.45	71.9	0.803
H3K27me3	E013	ESDR.CD56.MESO	hESC Derived CD56+ Mesoderm Cultured Cells	hESC_Derived_CD56+_Mesoderm_Cultured_Cells	Core	E013-H3K27me3.tagAlign.gz	4322464	225	0.0613434	35	0.0641931	1500	0.0561388	1.09271	0.646186	0.266	0.171	0.424	47	0.645
H3K27me3	E014	ESC.HUES48	HUES48 Cell Line	HUES48_Cell_Line	Core	E014-H3K27me3.tagAlign.gz	30000000	170	0.373454	35	0.373435	1500	0.344926	1.08271	1.00067	0.25	0.248	0.346	83	0.865
H3K27me3	E015	ESC.HUES6	HUES6 Cell Line	HUES6_Cell_Line	Core	E015-H3K27me3.tagAlign.gz	30000000	170	0.412405	35	0.404961	1500	0.367642	1.12175	1.19947	0.326	0.324	0.462	79.9	0.866
H3K27me3	E016	ESC.HUES64	HUES64 Cell Line	HUES64_Cell_Line	Core	E016-H3K27me3.tagAlign.gz	30000000	170	0.408628	35	0.40545	1500	0.369978	1.10446	1.08958	0.317	0.319	0.402	84.6	0.886
H3K27me3	E017	LNG.IMR90	IMR90 fetal lung fibroblasts Cell Line	IMR90_Cell_Line	Core	E017-H3K27me3.tagAlign.gz	30000000	140	0.329029	35	0.32002	1500	0.30983	1.06197	1.88409	0.219	0.259	0.548	48.6	0.741
H3K27me3	E018	IPSC.15b	iPS-15b Cell Line	iPS-15b_Cell_Line	Core	E018-H3K27me3.tagAlign.gz	25989220	175	0.347865	35	0.342331	1500	0.310303	1.12105	1.17277	0.288	0.281	0.394	76	0.831
H3K27me3	E019	IPSC.18	iPS-18 Cell Line	iPS-18_Cell_Line	Core	E019-H3K27me3.tagAlign.gz	30000000	215	0.441081	35	0.437581	1500	0.39235	1.1242	1.07736	0.349	0.35	0.428	84.5	0.861
H3K27me3	E020	IPSC.20B	iPS-20b Cell Line	iPS-20b_Cell_Line	Core	E020-H3K27me3.tagAlign.gz	30000000	190	0.405674	35	0.404154	1500	0.365957	1.10853	1.03981	0.307	0.304	0.402	86.3	0.875
H3K27me3	E021	IPSC.DF.6.9	iPS DF 6.9 Cell Line	iPS_DF_6.9_Cell_Line	Core	E021-H3K27me3.tagAlign.gz	30000000	110	0.315475	35	0.315726	1500	0.300687	1.04918	0.983308	0.103	0.08	0.206	47.1	0.736
H3K27me3	E022	IPSC.DF.19.11	iPS DF 19.11 Cell Line	iPS_DF_19.11_Cell_Line	Core	E022-H3K27me3.tagAlign.gz	30000000	115	0.305494	35	0.30415	1500	0.294247	1.03822	1.13575	0.06	0.04	0.141	38.7	0.664
H3K27me3	E023	FAT.MSC.DR.ADIP	Mesenchymal Stem Cell Derived Adipocyte Cultured Cells	Mesenchymal_Stem_Cell_Derived_Adipocyte_Cultured_Cells	Core	E023-H3K27me3.tagAlign.gz	30000000	185	0.30881	35	0.308964	1500	0.30034	1.0282	0.982131	0.074	0.017	0.415	34	0.634
H3K27me3	E024	ESC.4STAR	ES-UCSF4 Cell Line	4star	Core	E024-H3K27me3.tagAlign.gz	28279639	140	0.327332	35	0.306367	1500	0.290931	1.12512	2.35813	0.104	0.068	0.279	33.1	0.575
H3K27me3	E025	FAT.ADIP.DR.MSC	Adipose Derived Mesenchymal Stem Cell Cultured Cells	Adipose_Derived_Mesenchymal_Stem_Cell_Cultured_Cells	Core	E025-H3K27me3.tagAlign.gz	30000000	185	0.310847	35	0.312051	1500	0.303151	1.02539	0.864729	0.105	0.068	0.428	47.9	0.743
H3K27me3	E026	STRM.MRW.MSC	Bone Marrow Derived Cultured Mesenchymal Stem Cells	Bone_Marrow_Derived_Mesenchymal_Stem_Cell_Cultured_Cells	Core	E026-H3K27me3.tagAlign.gz	30000000	180	0.305354	35	0.307159	1500	0.299168	1.02068	0.774137	0.103	0.062	0.405	50.6	0.755
H3K27me3	E027	BRST.MYO	Breast Myoepithelial Primary Cells	Breast_Myoepithelial_Cells	Core	E027-H3K27me3.tagAlign.gz	29089725	140	0.314805	35	0.317958	1500	0.30256	1.04047	0.795198	0.125	0.095	0.412	36.9	0.577
H3K27me3	E028	BRST.HMEC.35	Breast variant Human Mammary Epithelial Cells (vHMEC)	Breast_vHMEC	Core	E028-H3K27me3.tagAlign.gz	16918735	330	0.206863	35	0.200269	1500	0.191229	1.08176	1.72942	0.174	0.126	0.339	36.4	0.629
H3K27me3	E029	BLD.CD14.PC	Primary monocytes from peripheral blood	CD14_Primary_Cells	Core	E029-H3K27me3.tagAlign.gz	22730312	180	0.287632	35	0.289143	1500	0.271598	1.05903	0.913866	0.271	0.263	0.441	79	0.875
H3K27me3	E030	BLD.CD15.PC	Primary neutrophils from peripheral blood	CD15_Primary_Cells	Core	E030-H3K27me3.tagAlign.gz	10454083	185	0.159634	35	0.156702	1500	0.145648	1.09602	1.26522	0.375	0.346	0.563	63.5	0.752
H3K27me3	E031	BLD.CD19.CPC	Primary B cells from cord blood	CD19_Primary_Cells_Cord_BI	Core	E031-H3K27me3.tagAlign.gz	20840272	140	0.234405	35	0.23317	1500	0.227073	1.03229	1.20267	0.103	0.045	0.381	22.6	0.228
H3K27me3	E032	BLD.CD19.PPC	Primary B cells from peripheral blood	CD19_Primary_Cells_Peripheral_UW	Core	E032-H3K27me3.tagAlign.gz	22790761	160	0.248188	35	0.251562	1500	0.24442	1.01542	0.527662	0.083	0.032	0.306	42.5	0.629
H3K27me3	E033	BLD.CD3.CPC	Primary T cells from cord blood	CD3_Primary_Cells_Cord_BI	Core	E033-H3K27me3.tagAlign.gz	21861431	155	0.247634	35	0.249791	1500	0.240368	1.03023	0.771101	0.136	0.112	0.443	43.3	0.509
H3K27me3	E034	BLD.CD3.PPC	Primary T cells from peripheral blood	CD3_Primary_Cells_Peripheral_UW	Core	E034-H3K27me3.tagAlign.gz	26362769	185	0.311896	35	0.304176	1500	0.283879	1.09869	1.38035	0.26	0.226	0.515	51.6	0.735
H3K27me3	E035	BLD.CD34.PC	Primary hematopoietic stem cells	CD34_Primary_Cells	Core	E035-H3K27me3.tagAlign.gz	16737779	145	0.200457	40	0.201953	1500	0.194243	1.03199	0.805952	0.158	0.125	0.43	36.9	0.482
H3K27me3	E036	BLD.CD34.CC	Primary hematopoietic stem cells short term culture	CD34_Cultured_Cells	Core	E036-H3K27me3.tagAlign.gz	11911610	135	0.156697	35	0.156426	1500	0.149799	1.04605	1.04094	0.246	0.201	0.505	35.8	0.53
H3K27me3	E037	BLD.CD4.MPC	Primary T helper memory cells from peripheral blood 2	CD4_Memory_Primary_Cells	Core	E037-H3K27me3.tagAlign.gz	30000000	230	0.295442	35	0.3003	1500	0.290427	1.01727	0.507947	0.024	0.005	0.147	30.6	0.551
H3K27me3	E038	BLD.CD4.NPC	Primary T helper naive cells from peripheral blood	CD4_Naive_Primary_Cells	Core	E038-H3K27me3.tagAlign.gz	30000000	225	0.295626	35	0.301155	1500	0.290001	1.0194	0.504346	0.025	0.006	0.135	30.5	0.54
H3K27me3	E039	BLD.CD4.CD25M.CD45RA.NPC	Primary T helper naive cells from peripheral blood	CD4+_CD25-_CD45RA+_Naive_Primary_Cells	Core	E039-H3K27me3.tagAlign.gz	23952515	225	0.252619	35	0.259401	1500	0.247072	1.02245	0.449952	0.06	0.018	0.241	43.7	0.652
H3K27me3	E040	BLD.CD4.CD25M.CD45RO.MPC	Primary T helper memory cells from peripheral blood 1	CD4+_CD25-_CD45RO+_Memory_Primary_Cells	Core	E040-H3K27me3.tagAlign.gz	30000000	245	0.296051	35	0.298672	1500	0.289654	1.02208	0.709338	0.044	0.009	0.229	42.6	0.665
H3K27me3	E041	BLD.CD4.CD25M.IL17M.PL.TPC	Primary T helper cells PMA-I stimulated	CD4+_CD25-_IL17-_PMA-Ionomycin_stimulated_MACS_purified_Th_Primary_Cells	Core	E041-H3K27me3.tagAlign.gz	30000000	255	0.299103	35	0.301336	1500	0.291498	1.02609	0.772994	0.068	0.025	0.319	56.8	0.758
H3K27me3	E042	BLD.CD4.CD25M.IL17P.PL.TPC	Primary T helper 17 cells PMA-I stimulated	CD4+_CD25-_IL17+_PMA-Ionomcyin_stimulated_Th17_Primary_Cells	Core	E042-H3K27me3.tagAlign.gz	30000000	215	0.298369	35	0.302577	1500	0.293362	1.01707	0.543336	0.054	0.014	0.266	44.8	0.67
H3K27me3	E043	BLD.CD4.CD25M.TPC	Primary T helper cells from peripheral blood	CD4+_CD25-_Th_Primary_Cells	Core	E043-H3K27me3.tagAlign.gz	30000000	220	0.29938	35	0.30239	1500	0.294068	1.01806	0.638252	0.056	0.012	0.315	49.3	0.7
H3K27me3	E044	BLD.CD4.CD25.CD127M.TREGPC	Primary T regulatory cells from peripheral blood	CD4+_CD25+_CD127-_Treg_Primary_Cells	Core	E044-H3K27me3.tagAlign.gz	30000000	210	0.300828	35	0.304257	1500	0.29496	1.01989	0.63114	0.075	0.034	0.316	56.2	0.746
H3K27me3	E045	BLD.CD4.CD25I.CD127.TMEMPC	Primary T cells effector/memory enriched from peripheral blood	CD4+_CD25int_CD127+_Tmem_Primary_Cells	Core	E045-H3K27me3.tagAlign.gz	20213799	195	0.2247	35	0.227285	1500	0.216329	1.0387	0.764086	0.062	0.015	0.225	35.4	0.56
H3K27me3	E046	BLD.CD56.PC	Primary Natural Killer cells from peripheral blood	CD56_Primary_Cells	Core	E046-H3K27me3.tagAlign.gz	28109323	160	0.290068	35	0.293087	1500	0.285514	1.01595	0.60136	0.077	0.03	0.307	41.6	0.624
H3K27me3	E047	BLD.CD8.NPC	Primary T killer naive cells from peripheral blood	CD8_Naive_Primary_Cells	Core	E047-H3K27me3.tagAlign.gz	30000000	155	0.298957	35	0.301637	1500	0.292798	1.02103	0.696774	0.043	0.009	0.212	32.7	0.56
H3K27me3	E048	BLD.CD8.MPC	Primary T killer memory cells from peripheral blood	CD8_Memory_Primary_Cells	Core	E048-H3K27me3.tagAlign.gz	30000000	215	0.295851	35	0.300468	1500	0.290874	1.01711	0.518773	0.027	0.006	0.15	32.6	0.582
H3K27me3	E049	STRM.CHON.MRW.DR.MSC	Mesenchymal Stem Cell Derived Chondrocyte Cultured Cells	Chondrocytes_from_Bone_Marrow_Derived_Mesenchymal_Stem_Cell_Cultured_Cells	Core	E049-H3K27me3.tagAlign.gz	30000000	190	0.309522	35	0.310802	1500	0.302709	1.0225	0.841821	0.123	0.102	0.479	49.3	0.745
H3K27me3	E050	BLD.MOB.CD34.PC.F	Primary hematopoietic stem cells G-CSF-mobilized Female	Mobilized_CD34_Primary_Cells_Female	Core	E050-H3K27me3.tagAlign.gz	30000000	185	0.308433	35	0.313139	1500	0.300839	1.02524	0.617354	0.131	0.124	0.351	67.8	0.822
H3K27me3	E051	BLD.MOB.CD34.PC.M	Primary hematopoietic stem cells G-CSF-mobilized Male	Mobilized_CD34_Primary_Cells_Male	Core	E051-H3K27me3.tagAlign.gz	30000000	115	0.338175	35	0.338468	1500	0.32261	1.04825	0.981544	0.247	0.276	0.497	66.3	0.81
H3K27me3	E052	MUS.SAT	Muscle Satellite Cultured Cells	Muscle_Satellite_Cultured_Cells	Core	E052-H3K27me3.tagAlign.gz	30000000	170	0.305949	35	0.306895	1500	0.298928	1.02349	0.881253	0.1	0.052	0.41	44.3	0.711
H3K27me3	E053	BRN.CRTX.DR.NRSPHR	Cortex derived primary cultured neurospheres	Neurosphere_Cultured_Cells_Cortex_Derived	Core	E053-H3K27me3.tagAlign.gz	30000000	180	0.310762	35	0.310662	1500	0.303944	1.02243	1.01477	0.108	0.085	0.365	48.5	0.745
H3K27me3	E054	BRN.GANGEM.DR.NRSPHR	Ganglion Eminence derived primary cultured neurospheres	Neurosphere_Cultured_Cells_Ganglionic_Eminence_Derived	Core	E054-H3K27me3.tagAlign.gz	30000000	125	0.298568	35	0.300306	1500	0.295575	1.01012	0.632592	0.042	0.013	0.244	35.6	0.554
H3K27me3	E055	SKIN.PEN.FRSK.FIB.01	Foreskin Fibroblast Primary Cells skin01	Penis_Foreskin_Fibroblast_Primary_Cells_skin01	Core	E055-H3K27me3.tagAlign.gz	30000000	190	0.326217	35	0.325004	1500	0.314981	1.03567	1.12097	0.188	0.187	0.49	56.7	0.813
H3K27me3	E056	SKIN.PEN.FRSK.FIB.02	Foreskin Fibroblast Primary Cells skin02	Penis_Foreskin_Fibroblast_Primary_Cells_skin02	Core	E056-H3K27me3.tagAlign.gz	30000000	175	0.315127	35	0.313826	1500	0.306859	1.02694	1.18675	0.114	0.073	0.407	51.7	0.768
H3K27me3	E057	SKIN.PEN.FRSK.KER.02	Foreskin Keratinocyte Primary Cells skin02	Penis_Foreskin_Keratinocyte_Primary_Cells_skin02	Core	E057-H3K27me3.tagAlign.gz	29784474	160	0.327905	35	0.319225	1500	0.308041	1.06448	1.77623	0.166	0.132	0.395	58.2	0.823
H3K27me3	E058	SKIN.PEN.FRSK.KER.03	Foreskin Keratinocyte Primary Cells skin03	Penis_Foreskin_Keratinocyte_Primary_Cells_skin03	Core	E058-H3K27me3.tagAlign.gz	30000000	190	0.328523	35	0.318105	1500	0.309406	1.06178	2.19764	0.147	0.112	0.381	57.6	0.825
H3K27me3	E059	SKIN.PEN.FRSK.MEL.01	Foreskin Melanocyte Primary Cells skin01	Penis_Foreskin_Melanocyte_Primary_Cells_skin01	Core	E059-H3K27me3.tagAlign.gz	30000000	145	0.310365	35	0.307088	1500	0.300052	1.03437	1.46576	0.094	0.047	0.346	40.9	0.635
H3K27me3	E061	SKIN.PEN.FRSK.MEL.03	Foreskin Melanocyte Primary Cells skin03	Penis_Foreskin_Melanocyte_Primary_Cells_skin03	Core	E061-H3K27me3.tagAlign.gz	30000000	150	0.330275	35	0.314358	1500	0.305874	1.07978	2.87601	0.14	0.112	0.43	46.1	0.693
H3K27me3	E062	BLD.PER.MONUC.PC	Primary mononuclear cells from peripheral blood	Peripheral_Blood_Mononuclear_Primary_Cells	Core	E062-H3K27me3.tagAlign.gz	30000000	300	0.302088	35	0.301728	1500	0.293751	1.02838	1.04511	0.091	0.047	0.286	61.2	0.779
H3K27me3	E063	FAT.ADIP.NUC	Adipose Nuclei	Adipose_Nuclei	Core	E063-H3K27me3.tagAlign.gz	30000000	180	0.303704	35	0.306139	1500	0.298009	1.01911	0.700483	0.076	0.021	0.33	43.8	0.665
H3K27me3	E065	HRT.AOR	Aorta	Aorta	Core	E065-H3K27me3.tagAlign.gz	15468868	130	0.194162	40	0.191664	1500	0.180076	1.07822	1.21564	0.156	0.062	0.398	10.4	0.343
H3K27me3	E066	LIV.ADLT	Liver	Adult_Liver	Core	E066-H3K27me3.tagAlign.gz	30000000	165	0.301923	35	0.30324	1500	0.293068	1.03021	0.87049	0.047	0.006	0.318	20.8	0.444
H3K27me3	E067	BRN.ANG.GYR	Brain Angular Gyrus	Brain_Angular_Gyrus	Core	E067-H3K27me3.tagAlign.gz	23795099	250	0.254898	35	0.259561	1500	0.249717	1.02075	0.526322	0.062	0.019	0.264	41.4	0.671
H3K27me3	E068	BRN.ANT.CAUD	Brain Anterior Caudate	Brain_Anterior_Caudate	Core	E068-H3K27me3.tagAlign.gz	30000000	170	0.296047	35	0.300031	1500	0.291832	1.01445	0.514128	0.034	0.009	0.188	32.3	0.582
H3K27me3	E069	BRN.CING.GYR	Brain Cingulate Gyrus	Brain_Cingulate_Gyrus	Core	E069-H3K27me3.tagAlign.gz	30000000	220	0.301154	35	0.304459	1500	0.295528	1.01904	0.62997	0.051	0.02	0.244	47.7	0.727
H3K27me3	E070	BRN.GRM.MTRX	Brain Germinal Matrix	Brain_Germinal_Matrix	Core	E070-H3K27me3.tagAlign.gz	15831098	165	0.215369	35	0.203162	1500	0.19641	1.09653	2.80777	0.215	0.168	0.373	58.4	0.777
H3K27me3	E071	BRN.HIPP.MID	Brain Hippocampus Middle	Brain_Hippocampus_Middle	Core	E071-H3K27me3.tagAlign.gz	30000000	245	0.30059	35	0.305204	1500	0.294467	1.0208	0.570331	0.054	0.02	0.246	51	0.747
H3K27me3	E072	BRN.INF.TMP	Brain Inferior Temporal Lobe	Brain_Inferior_Temporal_Lobe	Core	E072-H3K27me3.tagAlign.gz	30000000	215	0.296753	35	0.302338	1500	0.291613	1.01763	0.479256	0.046	0.016	0.218	43.5	0.702
H3K27me3	E073	BRN.DL.PRFRNTL.CRTX	Brain_Dorsolateral_Prefrontal_Cortex	Brain_Mid_Frontal_Lobe	Core	E073-H3K27me3.tagAlign.gz	25005527	220	0.263695	35	0.268519	1500	0.258831	1.01879	0.502085	0.054	0.016	0.245	42	0.672
H3K27me3	E074	BRN.SUB.NIG	Brain Substantia Nigra	Brain_Substantia_Nigra	Core	E074-H3K27me3.tagAlign.gz	30000000	140	0.295503	35	0.299277	1500	0.291298	1.01443	0.52699	0.032	0.007	0.17	31.7	0.555
H3K27me3	E075	GI.CLN.MUC	Colonic Mucosa	Colonic_Mucosa	Core	E075-H3K27me3.tagAlign.gz	11917259	150	0.150844	35	0.154268	1500	0.145215	1.03876	0.621784	0.161	0.085	0.313	41.3	0.613
H3K27me3	E076	GI.CLN.SM.MUS	Colon Smooth Muscle	Colon_Smooth_Muscle	Core	E076-H3K27me3.tagAlign.gz	30000000	310	0.295284	35	0.299373	1500	0.292437	1.00973	0.410463	0.035	0.012	0.132	52.2	0.72
H3K27me3	E077	GI.DUO.MUC	Duodenum Mucosa	Duodenum_Mucosa	Core	E077-H3K27me3.tagAlign.gz	30000000	170	0.301643	35	0.303384	1500	0.296164	1.0185	0.758849	0.051	0.015	0.22	45.7	0.674
H3K27me3	E078	GI.DUO.SM.MUS	Duodenum Smooth Muscle	Duodenum_Smooth_Muscle	Core	E078-H3K27me3.tagAlign.gz	30000000	235	0.301396	35	0.30465	1500	0.295882	1.01864	0.62892	0.064	0.034	0.218	61.5	0.791
H3K27me3	E079	GI.ESO	Esophagus	Esophagus	Core	E079-H3K27me3.tagAlign.gz	24579845	155	0.260642	35	0.263184	1500	0.251579	1.03603	0.780991	0.06	0.012	0.247	25.6	0.484
H3K27me3	E080	ADRL.GLND.FET	Fetal Adrenal Gland	Fetal_Adrenal_Gland	Core	E080-H3K27me3.tagAlign.gz	30000000	180	0.398708	35	0.375477	1500	0.338743	1.17702	1.63239	0.433	0.468	0.624	58.6	0.814
H3K27me3	E081	BRN.FET.M	Fetal Brain Male	Fetal_Brain_Male	Core	E081-H3K27me3.tagAlign.gz	30000000	200	0.30947	35	0.31123	1500	0.301447	1.02661	0.820069	0.122	0.106	0.311	57.3	0.732
H3K27me3	E082	BRN.FET.F	Fetal Brain Female	Fetal_Brain_Female	Core	E082-H3K27me3.tagAlign.gz	30000000	185	0.306647	35	0.307185	1500	0.301869	1.01583	0.898666	0.086	0.063	0.275	56.4	0.757
H3K27me3	E083	HRT.FET	Fetal Heart	Fetal_Heart	Core	E083-H3K27me3.tagAlign.gz	21485738	140	0.242632	35	0.244451	1500	0.234613	1.03418	0.815127	0.118	0.079	0.278	36.1	0.521
H3K27me3	E084	GI.L.INT.FET	Fetal Intestine Large	Fetal_Intestine_Large	Core	E084-H3K27me3.tagAlign.gz	30000000	170	0.318103	35	0.317839	1500	0.306371	1.03829	1.02298	0.147	0.117	0.327	62.3	0.831
H3K27me3	E085	GI.S.INT.FET	Fetal Intestine Small	Fetal_Intestine_Small	Core	E085-H3K27me3.tagAlign.gz	21167043	160	0.251386	35	0.248614	1500	0.239577	1.04929	1.30678	0.168	0.12	0.336	60.8	0.797
H3K27me3	E086	KID.FET	Fetal Kidney	Fetal_Kidney	Core	E086-H3K27me3.tagAlign.gz	30000000	150	0.303946	35	0.306243	1500	0.297035	1.02327	0.750556	0.072	0.043	0.194	44	0.64
H3K27me3	E087	PANC.ISLT	Pancreatic Islets	Pancreatic_Islets	Core	E087-H3K27me3.tagAlign.gz	12904397	180	0.162847	35	0.168623	1500	0.155352	1.04825	0.564791	0.18	0.103	0.407	19.2	0.406
H3K27me3	E088	LNG.FET	Fetal Lung	Fetal_Lung	Core	E088-H3K27me3.tagAlign.gz	30000000	175	0.318515	35	0.318362	1500	0.308374	1.03289	1.01527	0.134	0.107	0.354	49.6	0.693
H3K27me3	E089	MUS.TRNK.FET	Fetal Muscle Trunk	Fetal_Muscle_Trunk	Core	E089-H3K27me3.tagAlign.gz	19159641	185	0.324659	35	0.297748	1500	0.260387	1.24684	1.72032	0.413	0.418	0.602	67.2	0.809
H3K27me3	E090	MUS.LEG.FET	Fetal Muscle Leg	Fetal_Muscle_Leg	Core	E090-H3K27me3.tagAlign.gz	22108954	170	0.297279	35	0.287523	1500	0.267738	1.11034	1.4931	0.276	0.237	0.477	65.1	0.831
H3K27me3	E091	PLCNT.FET	Placenta	Fetal_Placenta	Core	E091-H3K27me3.tagAlign.gz	19275043	200	0.224672	35	0.225845	1500	0.216664	1.03696	0.87222	0.127	0.07	0.376	41.5	0.645
H3K27me3	E092	GI.STMC.FET	Fetal Stomach	Fetal_Stomach	Core	E092-H3K27me3.tagAlign.gz	21309182	180	0.372092	35	0.349148	1500	0.301047	1.23599	1.477	0.419	0.415	0.582	72.3	0.83
H3K27me3	E093	THYM.FET	Fetal Thymus	Fetal_Thymus	Core	E093-H3K27me3.tagAlign.gz	28332002	175	0.29945	35	0.301152	1500	0.292468	1.02387	0.803947	0.133	0.117	0.223	61.6	0.746
H3K27me3	E094	GI.STMC.GAST	Gastric	Gastric	Core	E094-H3K27me3.tagAlign.gz	15423262	175	0.18227	35	0.187994	1500	0.176176	1.03459	0.515635	0.061	0.008	0.215	5.8	0.225
H3K27me3	E095	HRT.VENT.L	Left Ventricle	Left_Ventricle	Core	E095-H3K27me3.tagAlign.gz	30000000	150	0.310683	35	0.311907	1500	0.295795	1.05033	0.924015	0.09	0.037	0.327	31.2	0.579
H3K27me3	E096	LNG	Lung	Lung	Core	E096-H3K27me3.tagAlign.gz	26851763	190	0.278919	40	0.280553	1500	0.273172	1.02104	0.778596	0.041	0.005	0.263	17	0.414
H3K27me3	E097	OVRY	Ovary	Ovary	Core	E097-H3K27me3.tagAlign.gz	28484714	185	0.288275	35	0.289993	1500	0.283475	1.01693	0.736443	0.036	0.004	0.211	19.2	0.361
H3K27me3	E098	PANC	Pancreas	Pancreas	Core	E098-H3K27me3.tagAlign.gz	12682102	180	0.154955	35	0.161795	1500	0.149159	1.03886	0.458685	0.072	0.01	0.206	3.6	0.148
H3K27me3	E099	PLCNT.AMN	Placenta Amnion	Placenta_Amnion	Core	E099-H3K27me3.tagAlign.gz	25408415	200	0.265475	35	0.26697	1500	0.262455	1.01151	0.668803	0.047	0.02	0.161	45.7	0.661
H3K27me3	E100	MUS.PSOAS	Psoas Muscle	Psoas_Muscle	Core	E100-H3K27me3.tagAlign.gz	8837740	140	0.131974	35	0.133187	1500	0.117502	1.12316	0.922667	0.293	0.202	0.499	27.6	0.416
H3K27me3	E101	GI.RECT.MUC.29	Rectal Mucosa Donor 29	Rectal_Mucosa.Donor_29	Core	E101-H3K27me3.tagAlign.gz	28331555	145	0.289052	35	0.290473	1500	0.283113	1.02098	0.806932	0.05	0.01	0.221	38.1	0.605
H3K27me3	E102	GI.RECT.MUC.31	Rectal Mucosa Donor 31	Rectal_Mucosa.Donor_31	Core	E102-H3K27me3.tagAlign.gz	30000000	170	0.300927	35	0.30142	1500	0.294854	1.0206	0.924992	0.051	0.014	0.212	43	0.636
H3K27me3	E103	GI.RECT.SM.MUS	Rectal Smooth Muscle	Rectal_Smooth_Muscle	Core	E103-H3K27me3.tagAlign.gz	23089621	130	0.249047	35	0.250444	1500	0.24175	1.03018	0.839266	0.063	0.016	0.201	33.3	0.518
H3K27me3	E104	HRT.ATR.R	Right Atrium	Right_Atrium	Core	E104-H3K27me3.tagAlign.gz	26426254	175	0.274234	35	0.275672	1500	0.269185	1.01876	0.778321	0.031	0.004	0.233	8.8	0.31
H3K27me3	E105	HRT.VNT.R	Right Ventricle	Right_Ventricle	Core	E105-H3K27me3.tagAlign.gz	23238486	180	0.249558	35	0.254702	1500	0.244859	1.01919	0.477358	0.047	0.007	0.268	26.2	0.475
H3K27me3	E106	GI.CLN.SIG	Sigmoid Colon	Sigmoid_Colon	Core	E106-H3K27me3.tagAlign.gz	30000000	135	0.310996	35	0.310901	1500	0.29465	1.05548	1.00583	0.088	0.024	0.348	28.9	0.545
H3K27me3	E107	MUS.SKLT.M	Skeletal Muscle Male	Skeletal_Muscle_Male	Core	E107-H3K27me3.tagAlign.gz	28560240	170	0.299765	35	0.300992	1500	0.291176	1.0295	0.874992	0.101	0.061	0.315	53.9	0.745
H3K27me3	E108	MUS.SKLT.F	Skeletal Muscle Female	Skeletal_Muscle_Female	Core	E108-H3K27me3.tagAlign.gz	29558349	175	0.301325	35	0.303165	1500	0.293981	1.02498	0.799636	0.077	0.035	0.259	52.5	0.726
H3K27me3	E109	GI.S.INT	Small Intestine	Small_Intestine	Core	E109-H3K27me3.tagAlign.gz	29634927	130	0.314301	35	0.308796	1500	0.294685	1.06657	1.39016	0.111	0.034	0.382	33.4	0.573
H3K27me3	E110	GI.STMC.MUC	Stomach Mucosa	Stomach_Mucosa	Core	E110-H3K27me3.tagAlign.gz	30000000	230	0.304517	35	0.305877	1500	0.298348	1.02068	0.819345	0.077	0.045	0.241	59.6	0.783
H3K27me3	E111	GI.STMC.MUS	Stomach Smooth Muscle	Stomach_Smooth_Muscle	Core	E111-H3K27me3.tagAlign.gz	24316981	160	0.267338	35	0.267265	1500	0.258251	1.03519	1.00809	0.088	0.034	0.319	41.4	0.64
H3K27me3	E112	THYM	Thymus	Thymus	Core	E112-H3K27me3.tagAlign.gz	26930743	180	0.286859	35	0.286495	1500	0.279907	1.02483	1.05524	0.1	0.078	0.265	60.3	0.685
H3K27me3	E113	SPLN	Spleen	Spleen	Core	E113-H3K27me3.tagAlign.gz	15457892	155	0.180494	35	0.187762	1500	0.176453	1.0229	0.357285	0.062	0.009	0.179	19.4	0.322
H3K27me3	E114	LNG.A549.ETOH002.CNCR	A549 EtOH 0.02pct Lung Carcinoma Cell Line	A549_EtOH_0.02pct_Lung_Carcinoma	Core	E114-H3K27me3.tagAlign.gz	30000000	215	0.309249	35	0.309956	1500	0.304292	1.01629	0.875153	0.077	0.03	0.396	21.1	0.407
H3K27me3	E115	BLD.DND41.CNCR	Dnd41 TCell Leukemia Cell Line	Dnd41_TCell_Leukemia	Core	E115-H3K27me3.tagAlign.gz	30000000	175	0.308382	35	0.307759	1500	0.301571	1.02258	1.10068	0.058	0.011	0.374	11.2	0.266
H3K27me3	E116	BLD.GM12878	GM12878 Lymphoblastoid Cell Line	GM12878_Lymphoblastoid	Core	E116-H3K27me3.tagAlign.gz	30000000	170	0.298702	35	0.300264	1500	0.294839	1.0131	0.712082	0.036	0.003	0.246	23.7	0.412
H3K27me3	E117	CRVX.HELAS3.CNCR	HeLa-S3 Cervical Carcinoma Cell Line	HeLa-S3_Cervical_Carcinoma	Core	E117-H3K27me3.tagAlign.gz	30000000	195	0.303733	35	0.306228	1500	0.30001	1.01241	0.598768	0.041	0.005	0.312	10.7	0.307
H3K27me3	E118	LIV.HEPG2.CNCR	HepG2 Hepatocellular Carcinoma Cell Line	HepG2_Hepatocellular_Carcinoma	Core	E118-H3K27me3.tagAlign.gz	29136989	185	0.316671	35	0.319158	1500	0.307366	1.03028	0.789128	0.143	0.105	0.493	23.8	0.447
H3K27me3	E119	BRST.HMEC	HMEC Mammary Epithelial Primary Cells	HMEC_Mammary_Epithelial	Core	E119-H3K27me3.tagAlign.gz	15665326	170	0.188104	35	0.19012	1500	0.181546	1.03612	0.764809	0.13	0.058	0.362	33.1	0.601
H3K27me3	E120	MUS.HSMM	HSMM Skeletal Muscle Myoblasts Cell Line	HSMM_Skeletal_Muscle_Myoblasts	Core	E120-H3K27me3.tagAlign.gz	20529194	155	0.233144	35	0.23531	1500	0.226773	1.02809	0.746341	0.108	0.041	0.355	31.7	0.571
H3K27me3	E121	MUS.HSMMT	HSMM cell derived Skeletal Muscle Myotubes Cell Line	HSMMtube_Skeletal_Muscle_Myotubes_Derived_from_HSMM	Core	E121-H3K27me3.tagAlign.gz	30000000	205	0.310093	35	0.310291	1500	0.303905	1.02036	0.969065	0.077	0.016	0.469	31	0.586
H3K27me3	E122	VAS.HUVEC	HUVEC Umbilical Vein Endothelial Cells Cell Line	HUVEC_Umbilical_Vein_Endothelial_Cells	Core	E122-H3K27me3.tagAlign.gz	23280856	190	0.272407	30	0.274896	1500	0.262288	1.03858	0.802573	0.212	0.18	0.47	43.9	0.678
H3K27me3	E123	BLD.K562.CNCR	K562 Leukemia Cell Line	K562_Leukemia	Core	E123-H3K27me3.tagAlign.gz	18741227	140	0.222752	35	0.224077	1500	0.214835	1.03685	0.856661	0.129	0.066	0.395	9.8	0.25
H3K27me3	E124	BLD.CD14.MONO	Monocytes-CD14+ RO01746 Cell Line	Monocytes-CD14+_RO01746	Core	E124-H3K27me3.tagAlign.gz	26235172	210	0.351116	35	0.35017	1500	0.327826	1.07105	1.04236	0.356	0.364	0.54	80.4	0.894
H3K27me3	E125	BRN.NHA	NH-A Astrocytes Cell Line	NH-A_Astrocytes	Core	E125-H3K27me3.tagAlign.gz	25109312	155	0.271133	35	0.273564	1500	0.26404	1.02686	0.744766	0.104	0.054	0.302	47.3	0.692
H3K27me3	E126	SKIN.NHDFAD	NHDF-Ad Adult Dermal Fibroblast Primary Cells	NHDF-Ad_Adult_Dermal_Fibroblasts	Core	E126-H3K27me3.tagAlign.gz	30000000	140	0.306502	35	0.3059	1500	0.297754	1.02938	1.07392	0.092	0.04	0.319	39	0.619
H3K27me3	E127	SKIN.NHEK	NHEK-Epidermal Keratinocyte Primary Cells	NHEK-Epidermal_Keratinocytes	Core	E127-H3K27me3.tagAlign.gz	17865993	185	0.226062	35	0.226179	1500	0.214236	1.0552	0.990243	0.233	0.196	0.46	57.6	0.805
H3K27me3	E128	LNG.NHLF	NHLF Lung Fibroblast Primary Cells	NHLF_Lung_Fibroblasts	Core	E128-H3K27me3.tagAlign.gz	15285316	195	0.188266	35	0.191014	1500	0.182655	1.03072	0.671193	0.191	0.143	0.421	47.6	0.725
H3K27me3	E129	BONE.OSTEO	Osteoblast Primary Cells	Osteoblasts	Core	E129-H3K27me3.tagAlign.gz	30000000	160	0.309664	35	0.310023	1500	0.301242	1.02796	0.959181	0.108	0.058	0.388	47.9	0.726
H3K36me3	E001	ESC.I3	ES-I3 Cell Line	ES-I3_Cell_Line	Core	E001-H3K36me3.tagAlign.gz	20540560	180	0.233402	35	0.23169	1500	0.220989	1.05617	1.15996	0.116	0.052	0.309	42	0.636
H3K36me3	E002	ESC.WA7	ES-WA7 Cell Line	ES-WA7_Cell_Line	Core	E002-H3K36me3.tagAlign.gz	9533889	120	0.120772	35	0.118404	1500	0.115298	1.04747	1.76213	0.125	0.042	0.248	16.9	0.287
H3K36me3	E003	ESC.H1	H1 Cell Line	H1_Cell_Line	Core	E003-H3K36me3.tagAlign.gz	30000000	100	0.315162	35	0.318278	1500	0.300827	1.04765	0.821416	0.2	0.198	0.382	57	0.766
H3K36me3	E004	ESDR.H1.BMP4.MESO	H1 BMP4 Derived Mesendoderm Cultured Cells	H1_BMP4_Derived_Mesendoderm_Cultured_Cells	Core	E004-H3K36me3.tagAlign.gz	30000000	120	0.299269	35	0.298093	1500	0.291122	1.02799	1.16875	0.022	0.004	0.11	10.9	0.231
H3K36me3	E005	ESDR.H1.BMP4.TROP	H1 BMP4 Derived Trophoblast Cultured Cells	H1_BMP4_Derived_Trophoblast_Cultured_Cells	Core	E005-H3K36me3.tagAlign.gz	30000000	130	0.347731	35	0.338538	1500	0.312167	1.11393	1.34858	0.304	0.308	0.483	65	0.785
H3K36me3	E006	ESDR.H1.MSC	H1 Derived Mesenchymal Stem Cells	H1_Derived_Mesenchymal_Stem_Cells	Core	E006-H3K36me3.tagAlign.gz	30000000	115	0.346669	35	0.336136	1500	0.309842	1.11886	1.40055	0.307	0.301	0.492	54.3	0.721
H3K36me3	E007	ESDR.H1.NEUR.PROG	H1 Derived Neuronal Progenitor Cultured Cells	H1_Derived_Neuronal_Progenitor_Cultured_Cells	Core	E007-H3K36me3.tagAlign.gz	30000000	125	0.299454	35	0.304069	1500	0.287292	1.04233	0.724892	0.099	0.033	0.245	41.8	0.602
H3K36me3	E008	ESC.H9	H9 Cell Line	H9_Cell_Line	Core	E008-H3K36me3.tagAlign.gz	22676195	110	0.262908	30	0.265416	1500	0.24582	1.06951	0.871965	0.205	0.172	0.368	52.2	0.69
H3K36me3	E009	ESDR.H9.NEUR.PROG	H9 Derived Neuronal Progenitor Cultured Cells	H9_Derived_Neuronal_Progenitor_Cultured_Cells	Core	E009-H3K36me3.tagAlign.gz	30000000	125	0.356324	35	0.359471	1500	0.342296	1.04098	0.816743	0.345	0.579	0.724	53.5	0.829
H3K36me3	E010	ESDR.H9.NEUR	H9 Derived Neuron Cultured Cells	H9_Derived_Neuron_Cultured_Cells	Core	E010-H3K36me3.tagAlign.gz	30000000	140	0.340945	35	0.342934	1500	0.327158	1.04214	0.873942	0.293	0.451	0.632	53	0.828
H3K36me3	E011	ESDR.CD184.ENDO	hESC Derived CD184+ Endoderm Cultured Cells	hESC_Derived_CD184+_Endoderm_Cultured_Cells	Core	E011-H3K36me3.tagAlign.gz	30000000	220	0.318154	35	0.323589	1500	0.309652	1.02746	0.610047	0.178	0.252	0.535	46.7	0.772
H3K36me3	E012	ESDR.CD56.ECTO	hESC Derived CD56+ Ectoderm Cultured Cells	hESC_Derived_CD56+_Ectoderm_Cultured_Cells	Core	E012-H3K36me3.tagAlign.gz	14361584	200	0.181436	35	0.190533	1500	0.176821	1.0261	0.336559	0.231	0.255	0.459	47.8	0.72
H3K36me3	E013	ESDR.CD56.MESO	hESC Derived CD56+ Mesoderm Cultured Cells	hESC_Derived_CD56+_Mesoderm_Cultured_Cells	Core	E013-H3K36me3.tagAlign.gz	21204689	215	0.271395	35	0.274184	1500	0.260825	1.04053	0.791268	0.355	0.581	0.737	49.8	0.82
H3K36me3	E014	ESC.HUES48	HUES48 Cell Line	HUES48_Cell_Line	Core	E014-H3K36me3.tagAlign.gz	30000000	175	0.323348	35	0.328446	1500	0.313204	1.03239	0.665542	0.233	0.289	0.474	65.3	0.872
H3K36me3	E015	ESC.HUES6	HUES6 Cell Line	HUES6_Cell_Line	Core	E015-H3K36me3.tagAlign.gz	30000000	165	0.330395	35	0.335355	1500	0.315912	1.04585	0.744926	0.269	0.336	0.518	66	0.868
H3K36me3	E016	ESC.HUES64	HUES64 Cell Line	HUES64_Cell_Line	Core	E016-H3K36me3.tagAlign.gz	30000000	165	0.333485	35	0.339011	1500	0.320736	1.03975	0.697634	0.276	0.358	0.532	64.2	0.868
H3K36me3	E017	LNG.IMR90	IMR90 fetal lung fibroblasts Cell Line	IMR90_Cell_Line	Core	E017-H3K36me3.tagAlign.gz	30000000	130	0.362926	35	0.353725	1500	0.327822	1.10708	1.35523	0.4	0.496	0.645	59.7	0.807
H3K36me3	E018	IPSC.15b	iPS-15b Cell Line	iPS-15b_Cell_Line	Core	E018-H3K36me3.tagAlign.gz	13388393	175	0.169948	35	0.175535	1500	0.163408	1.04002	0.539324	0.203	0.166	0.368	46.8	0.683
H3K36me3	E019	IPSC.18	iPS-18 Cell Line	iPS-18_Cell_Line	Core	E019-H3K36me3.tagAlign.gz	30000000	190	0.314331	35	0.318434	1500	0.3059	1.02756	0.672645	0.179	0.183	0.385	65.4	0.853
H3K36me3	E020	IPSC.20B	iPS-20b Cell Line	iPS-20b_Cell_Line	Core	E020-H3K36me3.tagAlign.gz	30000000	175	0.323925	35	0.328713	1500	0.313034	1.03479	0.694651	0.226	0.272	0.464	65.5	0.861
H3K36me3	E021	IPSC.DF.6.9	iPS DF 6.9 Cell Line	iPS_DF_6.9_Cell_Line	Core	E021-H3K36me3.tagAlign.gz	30000000	110	0.30921	35	0.31064	1500	0.296614	1.04247	0.898024	0.103	0.046	0.307	42.4	0.587
H3K36me3	E022	IPSC.DF.19.11	iPS DF 19.11 Cell Line	iPS_DF_19.11_Cell_Line	Core	E022-H3K36me3.tagAlign.gz	17605510	120	0.218644	35	0.219402	1500	0.204923	1.06696	0.947619	0.174	0.105	0.43	29.2	0.477
H3K36me3	E023	FAT.MSC.DR.ADIP	Mesenchymal Stem Cell Derived Adipocyte Cultured Cells	Mesenchymal_Stem_Cell_Derived_Adipocyte_Cultured_Cells	Core	E023-H3K36me3.tagAlign.gz	30000000	195	0.326611	35	0.327979	1500	0.312884	1.04387	0.909376	0.246	0.3	0.503	60	0.832
H3K36me3	E024	ESC.4STAR	ES-UCSF4 Cell Line	4star	Core	E024-H3K36me3.tagAlign.gz	30000000	160	0.342353	35	0.330254	1500	0.315445	1.0853	1.81704	0.23	0.255	0.473	55.7	0.775
H3K36me3	E025	FAT.ADIP.DR.MSC	Adipose Derived Mesenchymal Stem Cell Cultured Cells	Adipose_Derived_Mesenchymal_Stem_Cell_Cultured_Cells	Core	E025-H3K36me3.tagAlign.gz	30000000	195	0.327526	35	0.330172	1500	0.315319	1.03872	0.82187	0.265	0.368	0.562	57.8	0.845
H3K36me3	E026	STRM.MRW.MSC	Bone Marrow Derived Cultured Mesenchymal Stem Cells	Bone_Marrow_Derived_Mesenchymal_Stem_Cell_Cultured_Cells	Core	E026-H3K36me3.tagAlign.gz	30000000	180	0.321388	35	0.325144	1500	0.312486	1.02849	0.703241	0.212	0.28	0.515	58	0.846
H3K36me3	E027	BRST.MYO	Breast Myoepithelial Primary Cells	Breast_Myoepithelial_Cells	Core	E027-H3K36me3.tagAlign.gz	30000000	140	0.328443	35	0.329449	1500	0.31653	1.03764	0.922181	0.246	0.364	0.621	48.3	0.788
H3K36me3	E028	BRST.HMEC.35	Breast variant Human Mammary Epithelial Cells (vHMEC)	Breast_vHMEC	Core	E028-H3K36me3.tagAlign.gz	30000000	280	0.315515	35	0.312621	1500	0.304201	1.03719	1.34371	0.157	0.153	0.503	32	0.637
H3K36me3	E029	BLD.CD14.PC	Primary monocytes from peripheral blood	CD14_Primary_Cells	Core	E029-H3K36me3.tagAlign.gz	20505089	170	0.286312	35	0.290938	1500	0.273336	1.04747	0.737168	0.446	0.623	0.722	59.6	0.854
H3K36me3	E030	BLD.CD15.PC	Primary neutrophils from peripheral blood	CD15_Primary_Cells	Core	E030-H3K36me3.tagAlign.gz	22327666	180	0.314689	35	0.310506	1500	0.288782	1.08971	1.19255	0.421	0.517	0.606	56.2	0.75
H3K36me3	E031	BLD.CD19.CPC	Primary B cells from cord blood	CD19_Primary_Cells_Cord_BI	Core	E031-H3K36me3.tagAlign.gz	14915361	125	0.201333	35	0.202019	1500	0.192657	1.04503	0.926707	0.337	0.5	0.687	31.5	0.544
H3K36me3	E032	BLD.CD19.PPC	Primary B cells from peripheral blood	CD19_Primary_Cells_Peripheral_UW	Core	E032-H3K36me3.tagAlign.gz	22973371	150	0.279267	35	0.28389	1500	0.271703	1.02784	0.620663	0.272	0.437	0.62	50.7	0.793
H3K36me3	E033	BLD.CD3.CPC	Primary T cells from cord blood	CD3_Primary_Cells_Cord_BI	Core	E033-H3K36me3.tagAlign.gz	20743473	205	0.259663	35	0.260727	1500	0.246561	1.05314	0.924872	0.308	0.432	0.643	43.7	0.752
H3K36me3	E034	BLD.CD3.PPC	Primary T cells from peripheral blood	CD3_Primary_Cells_Peripheral_UW	Core	E034-H3K36me3.tagAlign.gz	22795000	160	0.283255	35	0.286708	1500	0.272705	1.03869	0.753417	0.314	0.447	0.615	60.6	0.855
H3K36me3	E035	BLD.CD34.PC	Primary hematopoietic stem cells	CD34_Primary_Cells	Core	E035-H3K36me3.tagAlign.gz	14619986	155	0.192249	35	0.193174	1500	0.184964	1.03939	0.887274	0.305	0.405	0.635	35.5	0.67
H3K36me3	E036	BLD.CD34.CC	Primary hematopoietic stem cells short term culture	CD34_Cultured_Cells	Core	E036-H3K36me3.tagAlign.gz	30000000	135	0.328689	35	0.331529	1500	0.314764	1.04424	0.830607	0.277	0.411	0.595	54.5	0.823
H3K36me3	E037	BLD.CD4.MPC	Primary T helper memory cells from peripheral blood 2	CD4_Memory_Primary_Cells	Core	E037-H3K36me3.tagAlign.gz	30000000	230	0.298922	35	0.303337	1500	0.294373	1.01545	0.507521	0.063	0.011	0.238	51.3	0.735
H3K36me3	E038	BLD.CD4.NPC	Primary T helper naive cells from peripheral blood	CD4_Naive_Primary_Cells	Core	E038-H3K36me3.tagAlign.gz	30000000	255	0.301321	35	0.306992	1500	0.295977	1.01806	0.485167	0.083	0.035	0.29	56.5	0.79
H3K36me3	E039	BLD.CD4.CD25M.CD45RA.NPC	Primary T helper naive cells from peripheral blood	CD4+_CD25-_CD45RA+_Naive_Primary_Cells	Core	E039-H3K36me3.tagAlign.gz	30000000	225	0.313427	35	0.319841	1500	0.305625	1.02553	0.548811	0.161	0.159	0.425	58.3	0.83
H3K36me3	E040	BLD.CD4.CD25M.CD45RO.MPC	Primary T helper memory cells from peripheral blood 1	CD4+_CD25-_CD45RO+_Memory_Primary_Cells	Core	E040-H3K36me3.tagAlign.gz	25486830	215	0.266391	35	0.273096	1500	0.260717	1.02176	0.45834	0.078	0.023	0.274	44.3	0.685
H3K36me3	E041	BLD.CD4.CD25M.IL17M.PL.TPC	Primary T helper cells PMA-I stimulated	CD4+_CD25-_IL17-_PMA-Ionomycin_stimulated_MACS_purified_Th_Primary_Cells	Core	E041-H3K36me3.tagAlign.gz	30000000	240	0.316302	35	0.320917	1500	0.308105	1.0266	0.639769	0.18	0.233	0.466	60.6	0.86
H3K36me3	E042	BLD.CD4.CD25M.IL17P.PL.TPC	Primary T helper 17 cells PMA-I stimulated	CD4+_CD25-_IL17+_PMA-Ionomcyin_stimulated_Th17_Primary_Cells	Core	E042-H3K36me3.tagAlign.gz	30000000	220	0.314613	35	0.319663	1500	0.305832	1.02871	0.634887	0.164	0.165	0.42	53.9	0.778
H3K36me3	E043	BLD.CD4.CD25M.TPC	Primary T helper cells from peripheral blood	CD4+_CD25-_Th_Primary_Cells	Core	E043-H3K36me3.tagAlign.gz	30000000	240	0.323179	35	0.328736	1500	0.314464	1.02772	0.610641	0.223	0.309	0.517	60.6	0.875
H3K36me3	E044	BLD.CD4.CD25.CD127M.TREGPC	Primary T regulatory cells from peripheral blood	CD4+_CD25+_CD127-_Treg_Primary_Cells	Core	E044-H3K36me3.tagAlign.gz	29367051	210	0.317666	35	0.323871	1500	0.307921	1.03165	0.610981	0.207	0.283	0.498	61.1	0.864
H3K36me3	E045	BLD.CD4.CD25I.CD127.TMEMPC	Primary T cells effector/memory enriched from peripheral blood	CD4+_CD25int_CD127+_Tmem_Primary_Cells	Core	E045-H3K36me3.tagAlign.gz	30000000	220	0.306327	35	0.313513	1500	0.299529	1.0227	0.486134	0.113	0.074	0.362	56.6	0.821
H3K36me3	E046	BLD.CD56.PC	Primary Natural Killer cells from peripheral blood	CD56_Primary_Cells	Core	E046-H3K36me3.tagAlign.gz	30000000	145	0.336259	35	0.340693	1500	0.326854	1.02877	0.679575	0.259	0.408	0.589	55.6	0.839
H3K36me3	E047	BLD.CD8.NPC	Primary T killer naive cells from peripheral blood	CD8_Naive_Primary_Cells	Core	E047-H3K36me3.tagAlign.gz	30000000	200	0.299829	35	0.304613	1500	0.294984	1.01642	0.503182	0.075	0.02	0.266	50.2	0.724
H3K36me3	E048	BLD.CD8.MPC	Primary T killer memory cells from peripheral blood	CD8_Memory_Primary_Cells	Core	E048-H3K36me3.tagAlign.gz	30000000	230	0.29919	35	0.304837	1500	0.294205	1.01694	0.468878	0.064	0.015	0.25	51.7	0.741
H3K36me3	E049	STRM.CHON.MRW.DR.MSC	Mesenchymal Stem Cell Derived Chondrocyte Cultured Cells	Chondrocytes_from_Bone_Marrow_Derived_Mesenchymal_Stem_Cell_Cultured_Cells	Core	E049-H3K36me3.tagAlign.gz	30000000	205	0.328973	35	0.333999	1500	0.318614	1.03251	0.673291	0.265	0.387	0.566	61.3	0.865
H3K36me3	E050	BLD.MOB.CD34.PC.F	Primary hematopoietic stem cells G-CSF-mobilized Female	Mobilized_CD34_Primary_Cells_Female	Core	E050-H3K36me3.tagAlign.gz	30000000	180	0.322974	35	0.327697	1500	0.31328	1.03095	0.672451	0.248	0.337	0.53	58.2	0.857
H3K36me3	E051	BLD.MOB.CD34.PC.M	Primary hematopoietic stem cells G-CSF-mobilized Male	Mobilized_CD34_Primary_Cells_Male	Core	E051-H3K36me3.tagAlign.gz	27890075	135	0.347134	35	0.349609	1500	0.324845	1.06861	0.900043	0.435	0.582	0.71	60.8	0.849
H3K36me3	E052	MUS.SAT	Muscle Satellite Cultured Cells	Muscle_Satellite_Cultured_Cells	Core	E052-H3K36me3.tagAlign.gz	30000000	175	0.307401	35	0.311778	1500	0.300838	1.02181	0.599893	0.115	0.082	0.404	50	0.781
H3K36me3	E053	BRN.CRTX.DR.NRSPHR	Cortex derived primary cultured neurospheres	Neurosphere_Cultured_Cells_Cortex_Derived	Core	E053-H3K36me3.tagAlign.gz	30000000	170	0.310661	35	0.314175	1500	0.305915	1.01552	0.574628	0.123	0.09	0.454	49.2	0.784
H3K36me3	E054	BRN.GANGEM.DR.NRSPHR	Ganglion Eminence derived primary cultured neurospheres	Neurosphere_Cultured_Cells_Ganglionic_Eminence_Derived	Core	E054-H3K36me3.tagAlign.gz	30000000	175	0.308959	35	0.312173	1500	0.304351	1.01514	0.58903	0.116	0.066	0.436	47.9	0.783
H3K36me3	E055	SKIN.PEN.FRSK.FIB.01	Foreskin Fibroblast Primary Cells skin01	Penis_Foreskin_Fibroblast_Primary_Cells_skin01	Core	E055-H3K36me3.tagAlign.gz	30000000	190	0.325263	35	0.325374	1500	0.314416	1.0345	0.989862	0.204	0.225	0.487	63.6	0.851
H3K36me3	E056	SKIN.PEN.FRSK.FIB.02	Foreskin Fibroblast Primary Cells skin02	Penis_Foreskin_Fibroblast_Primary_Cells_skin02	Core	E056-H3K36me3.tagAlign.gz	30000000	135	0.323099	35	0.321912	1500	0.311899	1.03591	1.1186	0.168	0.161	0.431	58.9	0.795
H3K36me3	E057	SKIN.PEN.FRSK.KER.02	Foreskin Keratinocyte Primary Cells skin02	Penis_Foreskin_Keratinocyte_Primary_Cells_skin02	Core	E057-H3K36me3.tagAlign.gz	21936760	145	0.278341	35	0.276631	1500	0.264482	1.0524	1.14081	0.317	0.412	0.606	56.3	0.803
H3K36me3	E058	SKIN.PEN.FRSK.KER.03	Foreskin Keratinocyte Primary Cells skin03	Penis_Foreskin_Keratinocyte_Primary_Cells_skin03	Core	E058-H3K36me3.tagAlign.gz	30000000	190	0.34951	35	0.347245	1500	0.333335	1.04852	1.16284	0.29	0.452	0.636	56.3	0.829
H3K36me3	E059	SKIN.PEN.FRSK.MEL.01	Foreskin Melanocyte Primary Cells skin01	Penis_Foreskin_Melanocyte_Primary_Cells_skin01	Core	E059-H3K36me3.tagAlign.gz	30000000	165	0.308652	35	0.309156	1500	0.302893	1.01901	0.919457	0.086	0.021	0.318	51.8	0.711
H3K36me3	E061	SKIN.PEN.FRSK.MEL.03	Foreskin Melanocyte Primary Cells skin03	Penis_Foreskin_Melanocyte_Primary_Cells_skin03	Core	E061-H3K36me3.tagAlign.gz	30000000	180	0.347145	35	0.336801	1500	0.3235	1.07309	1.77757	0.267	0.364	0.559	54.1	0.788
H3K36me3	E062	BLD.PER.MONUC.PC	Primary mononuclear cells from peripheral blood	Peripheral_Blood_Mononuclear_Primary_Cells	Core	E062-H3K36me3.tagAlign.gz	30000000	180	0.349179	35	0.345	1500	0.324907	1.07471	1.208	0.336	0.419	0.554	56.5	0.789
H3K36me3	E063	FAT.ADIP.NUC	Adipose Nuclei	Adipose_Nuclei	Core	E063-H3K36me3.tagAlign.gz	30000000	175	0.327923	35	0.330565	1500	0.31301	1.04764	0.849508	0.291	0.332	0.518	64.7	0.861
H3K36me3	E065	HRT.AOR	Aorta	Aorta	Core	E065-H3K36me3.tagAlign.gz	28146127	130	0.312194	40	0.307235	1500	0.290799	1.07357	1.30171	0.206	0.154	0.41	44.3	0.647
H3K36me3	E066	LIV.ADLT	Liver	Adult_Liver	Core	E066-H3K36me3.tagAlign.gz	30000000	150	0.336195	35	0.340622	1500	0.3223	1.04311	0.7584	0.311	0.42	0.591	55.6	0.81
H3K36me3	E067	BRN.ANG.GYR	Brain Angular Gyrus	Brain_Angular_Gyrus	Core	E067-H3K36me3.tagAlign.gz	30000000	180	0.303505	35	0.306771	1500	0.296704	1.02292	0.675558	0.103	0.038	0.299	55.4	0.771
H3K36me3	E068	BRN.ANT.CAUD	Brain Anterior Caudate	Brain_Anterior_Caudate	Core	E068-H3K36me3.tagAlign.gz	30000000	180	0.307624	35	0.311146	1500	0.300536	1.02358	0.668048	0.137	0.086	0.364	59.5	0.819
H3K36me3	E069	BRN.CING.GYR	Brain Cingulate Gyrus	Brain_Cingulate_Gyrus	Core	E069-H3K36me3.tagAlign.gz	30000000	180	0.30447	35	0.307812	1500	0.298302	1.02068	0.648525	0.113	0.05	0.321	58.2	0.8
H3K36me3	E070	BRN.GRM.MTRX	Brain Germinal Matrix	Brain_Germinal_Matrix	Core	E070-H3K36me3.tagAlign.gz	20583742	185	0.240183	35	0.242113	1500	0.235552	1.01966	0.70588	0.18	0.185	0.436	53.3	0.775
H3K36me3	E071	BRN.HIPP.MID	Brain Hippocampus Middle	Brain_Hippocampus_Middle	Core	E071-H3K36me3.tagAlign.gz	30000000	240	0.307861	35	0.312886	1500	0.30035	1.02501	0.599161	0.132	0.076	0.357	61.2	0.835
H3K36me3	E072	BRN.INF.TMP	Brain Inferior Temporal Lobe	Brain_Inferior_Temporal_Lobe	Core	E072-H3K36me3.tagAlign.gz	30000000	190	0.307201	35	0.311283	1500	0.299808	1.02466	0.644258	0.134	0.083	0.353	60.1	0.82
H3K36me3	E073	BRN.DL.PRFRNTL.CRTX	Brain_Dorsolateral_Prefrontal_Cortex	Brain_Mid_Frontal_Lobe	Core	E073-H3K36me3.tagAlign.gz	30000000	180	0.303777	35	0.307679	1500	0.297627	1.02067	0.611854	0.104	0.041	0.302	58	0.789
H3K36me3	E074	BRN.SUB.NIG	Brain Substantia Nigra	Brain_Substantia_Nigra	Core	E074-H3K36me3.tagAlign.gz	30000000	145	0.303178	35	0.307724	1500	0.296534	1.0224	0.593704	0.1	0.037	0.295	53.4	0.744
H3K36me3	E075	GI.CLN.MUC	Colonic Mucosa	Colonic_Mucosa	Core	E075-H3K36me3.tagAlign.gz	13166426	140	0.172747	35	0.176507	1500	0.166198	1.03941	0.635311	0.265	0.26	0.46	53.1	0.715
H3K36me3	E076	GI.CLN.SM.MUS	Colon Smooth Muscle	Colon_Smooth_Muscle	Core	E076-H3K36me3.tagAlign.gz	30000000	220	0.300991	35	0.306297	1500	0.295977	1.01694	0.485889	0.086	0.021	0.314	51	0.769
H3K36me3	E077	GI.DUO.MUC	Duodenum Mucosa	Duodenum_Mucosa	Core	E077-H3K36me3.tagAlign.gz	30000000	180	0.325784	35	0.328497	1500	0.313962	1.03765	0.813325	0.23	0.278	0.498	63.7	0.857
H3K36me3	E078	GI.DUO.SM.MUS	Duodenum Smooth Muscle	Duodenum_Smooth_Muscle	Core	E078-H3K36me3.tagAlign.gz	30000000	225	0.310861	35	0.31361	1500	0.302593	1.02733	0.750495	0.164	0.136	0.425	58.9	0.842
H3K36me3	E079	GI.ESO	Esophagus	Esophagus	Core	E079-H3K36me3.tagAlign.gz	17259442	135	0.227359	35	0.225785	1500	0.208678	1.08952	1.09203	0.29	0.267	0.466	57	0.763
H3K36me3	E080	ADRL.GLND.FET	Fetal Adrenal Gland	Fetal_Adrenal_Gland	Core	E080-H3K36me3.tagAlign.gz	24430422	170	0.3147	35	0.315642	1500	0.295808	1.06387	0.952498	0.401	0.495	0.65	66.8	0.863
H3K36me3	E081	BRN.FET.M	Fetal Brain Male	Fetal_Brain_Male	Core	E081-H3K36me3.tagAlign.gz	27976521	185	0.286234	35	0.288263	1500	0.27901	1.0259	0.78076	0.055	0.008	0.21	31.1	0.542
H3K36me3	E082	BRN.FET.F	Fetal Brain Female	Fetal_Brain_Female	Core	E082-H3K36me3.tagAlign.gz	30000000	185	0.306947	35	0.308241	1500	0.301352	1.01857	0.812118	0.117	0.063	0.371	54	0.793
H3K36me3	E083	HRT.FET	Fetal Heart	Fetal_Heart	Core	E083-H3K36me3.tagAlign.gz	18207403	90	0.207725	35	0.213775	1500	0.201973	1.02848	0.487379	0.098	0.019	0.258	19.5	0.375
H3K36me3	E084	GI.L.INT.FET	Fetal Intestine Large	Fetal_Intestine_Large	Core	E084-H3K36me3.tagAlign.gz	30000000	165	0.325001	35	0.326127	1500	0.313497	1.03669	0.910826	0.232	0.306	0.554	53.6	0.823
H3K36me3	E085	GI.S.INT.FET	Fetal Intestine Small	Fetal_Intestine_Small	Core	E085-H3K36me3.tagAlign.gz	30000000	180	0.363029	35	0.347104	1500	0.326164	1.11302	1.76045	0.373	0.443	0.613	54.6	0.756
H3K36me3	E086	KID.FET	Fetal Kidney	Fetal_Kidney	Core	E086-H3K36me3.tagAlign.gz	29628321	140	0.298817	35	0.303179	1500	0.292181	1.02271	0.603393	0.087	0.023	0.277	38.7	0.623
H3K36me3	E087	PANC.ISLT	Pancreatic Islets	Pancreatic_Islets	Core	E087-H3K36me3.tagAlign.gz	8531014	165	0.120751	35	0.123499	1500	0.110459	1.09317	0.789237	0.234	0.16	0.369	31.3	0.43
H3K36me3	E088	LNG.FET	Fetal Lung	Fetal_Lung	Core	E088-H3K36me3.tagAlign.gz	30000000	170	0.308627	35	0.312729	1500	0.300154	1.02823	0.673821	0.132	0.082	0.418	44.2	0.748
H3K36me3	E089	MUS.TRNK.FET	Fetal Muscle Trunk	Fetal_Muscle_Trunk	Core	E089-H3K36me3.tagAlign.gz	30000000	165	0.334926	35	0.336991	1500	0.321758	1.04092	0.864431	0.273	0.354	0.555	62	0.859
H3K36me3	E090	MUS.LEG.FET	Fetal Muscle Leg	Fetal_Muscle_Leg	Core	E090-H3K36me3.tagAlign.gz	30000000	165	0.330293	35	0.329372	1500	0.31481	1.04918	1.06325	0.253	0.313	0.536	58.5	0.846
H3K36me3	E091	PLCNT.FET	Placenta	Fetal_Placenta	Core	E091-H3K36me3.tagAlign.gz	22120641	160	0.270893	35	0.275356	1500	0.263201	1.02923	0.632842	0.284	0.387	0.571	50.7	0.768
H3K36me3	E092	GI.STMC.FET	Fetal Stomach	Fetal_Stomach	Core	E092-H3K36me3.tagAlign.gz	30000000	165	0.364541	35	0.354823	1500	0.330681	1.1024	1.40255	0.398	0.465	0.623	65.9	0.849
H3K36me3	E093	THYM.FET	Fetal Thymus	Fetal_Thymus	Core	E093-H3K36me3.tagAlign.gz	27691776	155	0.314272	35	0.316035	1500	0.303974	1.03388	0.853836	0.237	0.351	0.547	50.8	0.786
H3K36me3	E094	GI.STMC.GAST	Gastric	Gastric	Core	E094-H3K36me3.tagAlign.gz	20144690	150	0.257548	35	0.254807	1500	0.234897	1.09643	1.13769	0.283	0.26	0.458	63.2	0.795
H3K36me3	E095	HRT.VENT.L	Left Ventricle	Left_Ventricle	Core	E095-H3K36me3.tagAlign.gz	30000000	150	0.324604	35	0.323452	1500	0.305825	1.0614	1.06537	0.229	0.212	0.437	55.6	0.786
H3K36me3	E096	LNG	Lung	Lung	Core	E096-H3K36me3.tagAlign.gz	21103200	110	0.27322	35	0.271109	1500	0.24946	1.09524	1.0975	0.34	0.34	0.512	59.8	0.789
H3K36me3	E097	OVRY	Ovary	Ovary	Core	E097-H3K36me3.tagAlign.gz	25448976	110	0.292205	40	0.289193	1500	0.273778	1.0673	1.19541	0.237	0.216	0.436	47.1	0.698
H3K36me3	E098	PANC	Pancreas	Pancreas	Core	E098-H3K36me3.tagAlign.gz	27465612	125	0.30412	35	0.301686	1500	0.283217	1.07381	1.13179	0.189	0.137	0.372	55.4	0.724
H3K36me3	E099	PLCNT.AMN	Placenta Amnion	Placenta_Amnion	Core	E099-H3K36me3.tagAlign.gz	20685696	195	0.236163	35	0.238073	1500	0.232081	1.01759	0.681168	0.125	0.078	0.337	49.6	0.723
H3K36me3	E100	MUS.PSOAS	Psoas Muscle	Psoas_Muscle	Core	E100-H3K36me3.tagAlign.gz	18935078	155	0.222042	35	0.220656	1500	0.213329	1.04085	1.1892	0.133	0.062	0.32	30.8	0.525
H3K36me3	E101	GI.RECT.MUC.29	Rectal Mucosa Donor 29	Rectal_Mucosa.Donor_29	Core	E101-H3K36me3.tagAlign.gz	29628167	145	0.318917	35	0.321049	1500	0.307501	1.03713	0.842689	0.21	0.244	0.473	58.8	0.833
H3K36me3	E102	GI.RECT.MUC.31	Rectal Mucosa Donor 31	Rectal_Mucosa.Donor_31	Core	E102-H3K36me3.tagAlign.gz	30000000	140	0.314389	35	0.316897	1500	0.305368	1.02954	0.782425	0.17	0.163	0.421	52.7	0.782
H3K36me3	E103	GI.RECT.SM.MUS	Rectal Smooth Muscle	Rectal_Smooth_Muscle	Core	E103-H3K36me3.tagAlign.gz	25482942	145	0.274274	35	0.277501	1500	0.266455	1.02934	0.707809	0.133	0.075	0.337	53.8	0.736
H3K36me3	E104	HRT.ATR.R	Right Atrium	Right_Atrium	Core	E104-H3K36me3.tagAlign.gz	8084109	90	0.115453	35	0.12011	1500	0.102299	1.12859	0.738554	0.362	0.277	0.491	5.1	0.122
H3K36me3	E105	HRT.VNT.R	Right Ventricle	Right_Ventricle	Core	E105-H3K36me3.tagAlign.gz	22390897	150	0.257798	35	0.261034	1500	0.245308	1.05092	0.794231	0.177	0.133	0.371	54.3	0.745
H3K36me3	E106	GI.CLN.SIG	Sigmoid Colon	Sigmoid_Colon	Core	E106-H3K36me3.tagAlign.gz	30000000	150	0.32204	35	0.323469	1500	0.305852	1.05293	0.918874	0.213	0.199	0.433	58.8	0.813
H3K36me3	E107	MUS.SKLT.M	Skeletal Muscle Male	Skeletal_Muscle_Male	Core	E107-H3K36me3.tagAlign.gz	28968736	155	0.304991	35	0.308675	1500	0.296459	1.02878	0.698397	0.154	0.12	0.365	60	0.799
H3K36me3	E108	MUS.SKLT.F	Skeletal Muscle Female	Skeletal_Muscle_Female	Core	E108-H3K36me3.tagAlign.gz	29821919	180	0.313767	35	0.316962	1500	0.304347	1.03095	0.746726	0.181	0.176	0.417	58	0.807
H3K36me3	E109	GI.S.INT	Small Intestine	Small_Intestine	Core	E109-H3K36me3.tagAlign.gz	8439760	145	0.118504	35	0.122451	1500	0.112312	1.05513	0.610715	0.266	0.198	0.442	35.8	0.529
H3K36me3	E110	GI.STMC.MUC	Stomach Mucosa	Stomach_Mucosa	Core	E110-H3K36me3.tagAlign.gz	30000000	230	0.29741	35	0.301482	1500	0.293868	1.01205	0.465224	0.033	0.005	0.183	36.6	0.579
H3K36me3	E111	GI.STMC.MUS	Stomach Smooth Muscle	Stomach_Smooth_Muscle	Core	E111-H3K36me3.tagAlign.gz	24021908	160	0.274235	35	0.274249	1500	0.26333	1.04141	0.998786	0.212	0.221	0.466	58.1	0.815
H3K36me3	E112	THYM	Thymus	Thymus	Core	E112-H3K36me3.tagAlign.gz	26192104	100	0.308756	40	0.305283	1500	0.286413	1.07801	1.18404	0.267	0.283	0.462	51.3	0.706
H3K36me3	E113	SPLN	Spleen	Spleen	Core	E113-H3K36me3.tagAlign.gz	20093694	145	0.267996	35	0.264282	1500	0.242846	1.10356	1.17328	0.322	0.31	0.483	67.2	0.799
H3K36me3	E114	LNG.A549.ETOH002.CNCR	A549 EtOH 0.02pct Lung Carcinoma Cell Line	A549_EtOH_0.02pct_Lung_Carcinoma	Core	E114-H3K36me3.tagAlign.gz	30000000	215	0.317439	35	0.320184	1500	0.311554	1.01889	0.681905	0.127	0.107	0.431	43.5	0.727
H3K36me3	E115	BLD.DND41.CNCR	Dnd41 TCell Leukemia Cell Line	Dnd41_TCell_Leukemia	Core	E115-H3K36me3.tagAlign.gz	30000000	145	0.348394	35	0.350076	1500	0.330331	1.05468	0.914847	0.324	0.467	0.629	52.4	0.784
H3K36me3	E116	BLD.GM12878	GM12878 Lymphoblastoid Cell Line	GM12878_Lymphoblastoid	Core	E116-H3K36me3.tagAlign.gz	21752969	180	0.24943	35	0.255142	1500	0.2448	1.01892	0.447743	0.171	0.216	0.492	39.4	0.711
H3K36me3	E117	CRVX.HELAS3.CNCR	HeLa-S3 Cervical Carcinoma Cell Line	HeLa-S3_Cervical_Carcinoma	Core	E117-H3K36me3.tagAlign.gz	30000000	110	0.306107	35	0.309623	1500	0.302294	1.01262	0.520356	0.071	0.025	0.348	30.5	0.57
H3K36me3	E118	LIV.HEPG2.CNCR	HepG2 Hepatocellular Carcinoma Cell Line	HepG2_Hepatocellular_Carcinoma	Core	E118-H3K36me3.tagAlign.gz	17385674	185	0.225887	30	0.228976	1500	0.218595	1.03336	0.702438	0.267	0.357	0.553	42.2	0.697
H3K36me3	E119	BRST.HMEC	HMEC Mammary Epithelial Primary Cells	HMEC_Mammary_Epithelial	Core	E119-H3K36me3.tagAlign.gz	18511716	125	0.219868	35	0.224341	1500	0.214464	1.0252	0.547096	0.189	0.197	0.449	40.6	0.674
H3K36me3	E120	MUS.HSMM	HSMM Skeletal Muscle Myoblasts Cell Line	HSMM_Skeletal_Muscle_Myoblasts	Core	E120-H3K36me3.tagAlign.gz	30000000	155	0.3172	35	0.318319	1500	0.308363	1.02866	0.88757	0.138	0.154	0.507	37.1	0.687
H3K36me3	E121	MUS.HSMMT	HSMM cell derived Skeletal Muscle Myotubes Cell Line	HSMMtube_Skeletal_Muscle_Myotubes_Derived_from_HSMM	Core	E121-H3K36me3.tagAlign.gz	23652669	215	0.268249	35	0.270468	1500	0.259638	1.03316	0.795069	0.167	0.162	0.444	47.8	0.736
H3K36me3	E122	VAS.HUVEC	HUVEC Umbilical Vein Endothelial Cells Cell Line	HUVEC_Umbilical_Vein_Endothelial_Cells	Core	E122-H3K36me3.tagAlign.gz	22046983	190	0.249682	35	0.256506	1500	0.244989	1.01916	0.407516	0.155	0.161	0.422	44.6	0.71
H3K36me3	E123	BLD.K562.CNCR	K562 Leukemia Cell Line	K562_Leukemia	Core	E123-H3K36me3.tagAlign.gz	20588970	170	0.249636	35	0.251689	1500	0.239398	1.04277	0.832982	0.215	0.26	0.485	37.5	0.634
H3K36me3	E124	BLD.CD14.MONO	Monocytes-CD14+ RO01746 Cell Line	Monocytes-CD14+_RO01746	Core	E124-H3K36me3.tagAlign.gz	30000000	225	0.36734	35	0.373974	1500	0.34879	1.05318	0.736574	0.458	0.631	0.728	60.3	0.861
H3K36me3	E125	BRN.NHA	NH-A Astrocytes Cell Line	NH-A_Astrocytes	Core	E125-H3K36me3.tagAlign.gz	26980400	140	0.287989	35	0.291988	1500	0.281413	1.02337	0.621833	0.126	0.091	0.378	44.4	0.704
H3K36me3	E126	SKIN.NHDFAD	NHDF-Ad Adult Dermal Fibroblast Primary Cells	NHDF-Ad_Adult_Dermal_Fibroblasts	Core	E126-H3K36me3.tagAlign.gz	30000000	125	0.306836	35	0.308986	1500	0.300555	1.0209	0.745045	0.095	0.036	0.358	39.1	0.633
H3K36me3	E127	SKIN.NHEK	NHEK-Epidermal Keratinocyte Primary Cells	NHEK-Epidermal_Keratinocytes	Core	E127-H3K36me3.tagAlign.gz	19064897	145	0.229454	30	0.233416	1500	0.223045	1.02873	0.617971	0.215	0.265	0.508	41.4	0.714
H3K36me3	E128	LNG.NHLF	NHLF Lung Fibroblast Primary Cells	NHLF_Lung_Fibroblasts	Core	E128-H3K36me3.tagAlign.gz	22059290	125	0.25647	35	0.256309	1500	0.245573	1.04437	1.015	0.184	0.175	0.425	48.6	0.693
H3K36me3	E129	BONE.OSTEO	Osteoblast Primary Cells	Osteoblasts	Core	E129-H3K36me3.tagAlign.gz	30000000	185	0.316407	35	0.319638	1500	0.307696	1.02831	0.729465	0.166	0.192	0.448	54.6	0.809
H3K4ac	E003	ESC.H1	H1 Cell Line	H1_Cell_Line	Class1	E003-H3K4ac.tagAlign.gz	45000000	120	0.391422	30	0.390193	1500	0.378027	1.03543	1.10097	0.12	0.02	0.28	26.3	0.554
H3K4ac	E004	ESDR.H1.BMP4.MESO	H1 BMP4 Derived Mesendoderm Cultured Cells	H1_BMP4_Derived_Mesendoderm_Cultured_Cells	Class1	E004-H3K4ac.tagAlign.gz	14048617	155	0.18559	35	0.182184	1500	0.169999	1.09171	1.27949	0.25	0.2	0.45	28.7	0.519
H3K4ac	E005	ESDR.H1.BMP4.TROP	H1 BMP4 Derived Trophoblast Cultured Cells	H1_BMP4_Derived_Trophoblast_Cultured_Cells	Class1	E005-H3K4ac.tagAlign.gz	35028819	130	0.373489	35	0.364713	1500	0.33909	1.10144	1.34249	0.26	0.25	0.46	48.2	0.695
H3K4ac	E006	ESDR.H1.MSC	H1 Derived Mesenchymal Stem Cells	H1_Derived_Mesenchymal_Stem_Cells	Class1	E006-H3K4ac.tagAlign.gz	45000000	130	0.253587	35	0.249238	1500	0.233484	1.0861	1.2761	0.34	0.19	0.45	63.1	0.816
H3K4ac	E007	ESDR.H1.NEUR.PROG	H1 Derived Neuronal Progenitor Cultured Cells	H1_Derived_Neuronal_Progenitor_Cultured_Cells	Class1	E007-H3K4ac.tagAlign.gz	45000000	145	0.327851	35	0.330245	1500	0.316263	1.03664	0.828748	0.19	0.03	0.35	22.1	0.546
H3K4ac	E008	ESC.H9	H9 Cell Line	H9_Cell_Line	Class1	E008-H3K4ac.tagAlign.gz	45000000	340	0.388505	35	0.390684	1500	0.379974	1.02245	0.796542	0.12	0.03	0.32	31.6	0.628
H3K4ac	E017	LNG.IMR90	IMR90 fetal lung fibroblasts Cell Line	IMR90_Cell_Line	Class1	E017-H3K4ac.tagAlign.gz	45000000	115	0.498264	45	0.458698	1500	0.396445	1.25683	1.63555	0.55	0.56	0.66	70.4	0.81
H3K4me1	E001	ESC.I3	ES-I3 Cell Line	ES-I3_Cell_Line	Core	E001-H3K4me1.tagAlign.gz	30000000	195	0.320585	35	0.314547	1500	0.295518	1.08482	1.31732	0.26	0.199	0.516	38.8	0.717
H3K4me1	E002	ESC.WA7	ES-WA7 Cell Line	ES-WA7_Cell_Line	Core	E002-H3K4me1.tagAlign.gz	10108554	130	0.148532	35	0.138413	1500	0.127433	1.16557	1.92161	0.396	0.367	0.557	18.4	0.382
H3K4me1	E003	ESC.H1	H1 Cell Line	H1_Cell_Line	Core	E003-H3K4me1.tagAlign.gz	30000000	145	0.313236	35	0.311397	1500	0.292254	1.07179	1.09606	0.23	0.175	0.45	42.5	0.716
H3K4me1	E004	ESDR.H1.BMP4.MESO	H1 BMP4 Derived Mesendoderm Cultured Cells	H1_BMP4_Derived_Mesendoderm_Cultured_Cells	Core	E004-H3K4me1.tagAlign.gz	30000000	135	0.306441	35	0.30341	1500	0.292451	1.04783	1.27652	0.113	0.019	0.321	28	0.539
H3K4me1	E005	ESDR.H1.BMP4.TROP	H1 BMP4 Derived Trophoblast Cultured Cells	H1_BMP4_Derived_Trophoblast_Cultured_Cells	Core	E005-H3K4me1.tagAlign.gz	30000000	135	0.334113	35	0.324504	1500	0.298535	1.11917	1.37003	0.297	0.279	0.494	46.1	0.683
H3K4me1	E006	ESDR.H1.MSC	H1 Derived Mesenchymal Stem Cells	H1_Derived_Mesenchymal_Stem_Cells	Core	E006-H3K4me1.tagAlign.gz	30000000	110	0.346652	40	0.328981	1500	0.300169	1.15485	1.61333	0.32	0.303	0.501	40.2	0.61
H3K4me1	E007	ESDR.H1.NEUR.PROG	H1 Derived Neuronal Progenitor Cultured Cells	H1_Derived_Neuronal_Progenitor_Cultured_Cells	Core	E007-H3K4me1.tagAlign.gz	30000000	115	0.306679	35	0.307171	1500	0.288458	1.06316	0.973696	0.145	0.062	0.345	32.3	0.584
H3K4me1	E008	ESC.H9	H9 Cell Line	H9_Cell_Line	Core	E008-H3K4me1.tagAlign.gz	30000000	135	0.304547	35	0.303717	1500	0.289092	1.05346	1.05678	0.102	0.019	0.295	30.7	0.576
H3K4me1	E009	ESDR.H9.NEUR.PROG	H9 Derived Neuronal Progenitor Cultured Cells	H9_Derived_Neuronal_Progenitor_Cultured_Cells	Core	E009-H3K4me1.tagAlign.gz	28071907	120	0.311493	35	0.310552	1500	0.28652	1.08716	1.03918	0.289	0.262	0.445	44.2	0.663
H3K4me1	E010	ESDR.H9.NEUR	H9 Derived Neuron Cultured Cells	H9_Derived_Neuron_Cultured_Cells	Core	E010-H3K4me1.tagAlign.gz	30000000	135	0.349855	35	0.346036	1500	0.306309	1.14216	1.09614	0.42	0.431	0.565	44.9	0.664
H3K4me1	E011	ESDR.CD184.ENDO	hESC Derived CD184+ Endoderm Cultured Cells	hESC_Derived_CD184+_Endoderm_Cultured_Cells	Core	E011-H3K4me1.tagAlign.gz	30000000	220	0.312321	35	0.311456	1500	0.29767	1.04922	1.06273	0.174	0.048	0.47	33.9	0.638
H3K4me1	E012	ESDR.CD56.ECTO	hESC Derived CD56+ Ectoderm Cultured Cells	hESC_Derived_CD56+_Ectoderm_Cultured_Cells	Core	E012-H3K4me1.tagAlign.gz	13876103	230	0.184328	35	0.18431	1500	0.171015	1.07785	1.00139	0.373	0.358	0.575	40.4	0.658
H3K4me1	E013	ESDR.CD56.MESO	hESC Derived CD56+ Mesoderm Cultured Cells	hESC_Derived_CD56+_Mesoderm_Cultured_Cells	Core	E013-H3K4me1.tagAlign.gz	11179426	205	0.159981	35	0.156315	1500	0.144041	1.11066	1.29865	0.486	0.512	0.653	33.2	0.608
H3K4me1	E014	ESC.HUES48	HUES48 Cell Line	HUES48_Cell_Line	Core	E014-H3K4me1.tagAlign.gz	30000000	175	0.317668	35	0.314114	1500	0.296137	1.07271	1.19768	0.259	0.194	0.5	47.3	0.777
H3K4me1	E015	ESC.HUES6	HUES6 Cell Line	HUES6_Cell_Line	Core	E015-H3K4me1.tagAlign.gz	30000000	165	0.324432	35	0.320298	1500	0.297354	1.09106	1.18016	0.315	0.301	0.554	47.2	0.772
H3K4me1	E016	ESC.HUES64	HUES64 Cell Line	HUES64_Cell_Line	Core	E016-H3K4me1.tagAlign.gz	30000000	180	0.31954	35	0.315887	1500	0.297797	1.07301	1.20189	0.261	0.196	0.506	44.8	0.756
H3K4me1	E017	LNG.IMR90	IMR90 fetal lung fibroblasts Cell Line	IMR90_Cell_Line	Core	E017-H3K4me1.tagAlign.gz	30000000	140	0.386298	45	0.353982	1500	0.306217	1.26152	1.67657	0.54	0.603	0.71	53.8	0.74
H3K4me1	E018	IPSC.15b	iPS-15b Cell Line	iPS-15b_Cell_Line	Core	E018-H3K4me1.tagAlign.gz	28103845	165	0.305997	35	0.299258	1500	0.281884	1.08554	1.38792	0.244	0.18	0.474	43.9	0.73
H3K4me1	E019	IPSC.18	iPS-18 Cell Line	iPS-18_Cell_Line	Core	E019-H3K4me1.tagAlign.gz	30000000	220	0.319314	35	0.315964	1500	0.2984	1.07009	1.1907	0.268	0.216	0.492	52.8	0.797
H3K4me1	E020	IPSC.20B	iPS-20b Cell Line	iPS-20b_Cell_Line	Core	E020-H3K4me1.tagAlign.gz	30000000	175	0.311611	35	0.309901	1500	0.295693	1.05384	1.12042	0.184	0.079	0.432	47.3	0.772
H3K4me1	E021	IPSC.DF.6.9	iPS DF 6.9 Cell Line	iPS_DF_6.9_Cell_Line	Core	E021-H3K4me1.tagAlign.gz	30000000	120	0.313251	35	0.310049	1500	0.294414	1.06398	1.20475	0.147	0.064	0.375	33.4	0.591
H3K4me1	E022	IPSC.DF.19.11	iPS DF 19.11 Cell Line	iPS_DF_19.11_Cell_Line	Core	E022-H3K4me1.tagAlign.gz	30000000	120	0.322272	35	0.317535	1500	0.298588	1.07932	1.25003	0.199	0.138	0.141	40.1	0.642
H3K4me1	E023	FAT.MSC.DR.ADIP	Mesenchymal Stem Cell Derived Adipocyte Cultured Cells	Mesenchymal_Stem_Cell_Derived_Adipocyte_Cultured_Cells	Core	E023-H3K4me1.tagAlign.gz	30000000	200	0.331427	35	0.325383	1500	0.300201	1.10402	1.24002	0.385	0.377	0.596	47.6	0.773
H3K4me1	E024	ESC.4STAR	ES-UCSF4 Cell Line	4star	Core	E024-H3K4me1.tagAlign.gz	30000000	160	0.333131	35	0.315764	1500	0.302237	1.10222	2.28397	0.2	0.122	0.47	39.1	0.673
H3K4me1	E025	FAT.ADIP.DR.MSC	Adipose Derived Mesenchymal Stem Cell Cultured Cells	Adipose_Derived_Mesenchymal_Stem_Cell_Cultured_Cells	Core	E025-H3K4me1.tagAlign.gz	30000000	200	0.347915	35	0.341258	1500	0.308709	1.127	1.20454	0.522	0.56	0.715	45.5	0.774
H3K4me1	E026	STRM.MRW.MSC	Bone Marrow Derived Cultured Mesenchymal Stem Cells	Bone_Marrow_Derived_Mesenchymal_Stem_Cell_Cultured_Cells	Core	E026-H3K4me1.tagAlign.gz	30000000	200	0.334733	35	0.329657	1500	0.301949	1.10857	1.18321	0.404	0.408	0.561	59.1	0.837
H3K4me1	E027	BRST.MYO	Breast Myoepithelial Primary Cells	Breast_Myoepithelial_Cells	Core	E027-H3K4me1.tagAlign.gz	30000000	140	0.326545	35	0.324686	1500	0.304911	1.07095	1.094	0.313	0.337	0.549	30.6	0.603
H3K4me1	E028	BRST.HMEC.35	Breast variant Human Mammary Epithelial Cells (vHMEC)	Breast_vHMEC	Core	E028-H3K4me1.tagAlign.gz	30000000	140	0.319969	40	0.317528	1500	0.297054	1.07714	1.11924	0.287	0.277	0.495	45.1	0.729
H3K4me1	E029	BLD.CD14.PC	Primary monocytes from peripheral blood	CD14_Primary_Cells	Core	E029-H3K4me1.tagAlign.gz	30000000	200	0.459341	35	0.439931	1500	0.354231	1.29673	1.22649	0.703	0.747	0.781	61.5	0.805
H3K4me1	E030	BLD.CD15.PC	Primary neutrophils from peripheral blood	CD15_Primary_Cells	Core	E030-H3K4me1.tagAlign.gz	30000000	205	0.396379	35	0.389118	1500	0.33661	1.17756	1.13827	0.501	0.529	0.58	51.8	0.695
H3K4me1	E031	BLD.CD19.CPC	Primary B cells from cord blood	CD19_Primary_Cells_Cord_BI	Core	E031-H3K4me1.tagAlign.gz	8036019	290	0.180545	35	0.173912	1500	0.146825	1.22966	1.24489	0.747	0.785	0.826	53.1	0.729
H3K4me1	E032	BLD.CD19.PPC	Primary B cells from peripheral blood	CD19_Primary_Cells_Peripheral_UW	Core	E032-H3K4me1.tagAlign.gz	29388415	180	0.410474	35	0.400386	1500	0.336556	1.21963	1.15804	0.545	0.586	0.646	52.4	0.698
H3K4me1	E033	BLD.CD3.CPC	Primary T cells from cord blood	CD3_Primary_Cells_Cord_BI	Core	E033-H3K4me1.tagAlign.gz	14506208	130	0.209456	35	0.211591	1500	0.187911	1.11466	0.909841	0.446	0.459	0.542	45.6	0.641
H3K4me1	E034	BLD.CD3.PPC	Primary T cells from peripheral blood	CD3_Primary_Cells_Peripheral_UW	Core	E034-H3K4me1.tagAlign.gz	23290041	180	0.383934	35	0.364253	1500	0.301101	1.2751	1.31163	0.562	0.602	0.665	73.4	0.815
H3K4me1	E035	BLD.CD34.PC	Primary hematopoietic stem cells	CD34_Primary_Cells	Core	E035-H3K4me1.tagAlign.gz	18886104	175	0.24614	35	0.241582	1500	0.217663	1.13084	1.19057	0.418	0.422	0.523	56.7	0.781
H3K4me1	E036	BLD.CD34.CC	Primary hematopoietic stem cells short term culture	CD34_Cultured_Cells	Core	E036-H3K4me1.tagAlign.gz	30000000	145	0.335598	35	0.333598	1500	0.306362	1.09543	1.07345	0.357	0.373	0.504	58.2	0.81
H3K4me1	E037	BLD.CD4.MPC	Primary T helper memory cells from peripheral blood 2	CD4_Memory_Primary_Cells	Core	E037-H3K4me1.tagAlign.gz	30000000	245	0.335245	35	0.336432	1500	0.313107	1.0707	0.949088	0.315	0.337	0.468	67.9	0.859
H3K4me1	E038	BLD.CD4.NPC	Primary T helper naive cells from peripheral blood	CD4_Naive_Primary_Cells	Core	E038-H3K4me1.tagAlign.gz	30000000	235	0.323459	35	0.325965	1500	0.305453	1.05895	0.877819	0.255	0.257	0.406	70.5	0.86
H3K4me1	E039	BLD.CD4.CD25M.CD45RA.NPC	Primary T helper naive cells from peripheral blood	CD4+_CD25-_CD45RA+_Naive_Primary_Cells	Core	E039-H3K4me1.tagAlign.gz	30000000	220	0.33194	35	0.334393	1500	0.311484	1.06567	0.892911	0.301	0.327	0.461	67.9	0.861
H3K4me1	E040	BLD.CD4.CD25M.CD45RO.MPC	Primary T helper memory cells from peripheral blood 1	CD4+_CD25-_CD45RO+_Memory_Primary_Cells	Core	E040-H3K4me1.tagAlign.gz	19489837	245	0.252152	35	0.252921	1500	0.231696	1.08829	0.963759	0.365	0.401	0.508	70	0.878
H3K4me1	E041	BLD.CD4.CD25M.IL17M.PL.TPC	Primary T helper cells PMA-I stimulated	CD4+_CD25-_IL17-_PMA-Ionomycin_stimulated_MACS_purified_Th_Primary_Cells	Core	E041-H3K4me1.tagAlign.gz	30000000	255	0.341531	35	0.340904	1500	0.316771	1.07817	1.02598	0.36	0.419	0.536	68.9	0.884
H3K4me1	E042	BLD.CD4.CD25M.IL17P.PL.TPC	Primary T helper 17 cells PMA-I stimulated	CD4+_CD25-_IL17+_PMA-Ionomcyin_stimulated_Th17_Primary_Cells	Core	E042-H3K4me1.tagAlign.gz	30000000	200	0.329813	35	0.329943	1500	0.308644	1.06858	0.993873	0.286	0.298	0.426	66.3	0.833
H3K4me1	E043	BLD.CD4.CD25M.TPC	Primary T helper cells from peripheral blood	CD4+_CD25-_Th_Primary_Cells	Core	E043-H3K4me1.tagAlign.gz	23864916	225	0.302204	35	0.303742	1500	0.277215	1.09014	0.942035	0.415	0.463	0.564	72.2	0.901
H3K4me1	E044	BLD.CD4.CD25.CD127M.TREGPC	Primary T regulatory cells from peripheral blood	CD4+_CD25+_CD127-_Treg_Primary_Cells	Core	E044-H3K4me1.tagAlign.gz	17251849	205	0.222064	35	0.223439	1500	0.203895	1.08911	0.929651	0.321	0.338	0.436	65.5	0.838
H3K4me1	E045	BLD.CD4.CD25I.CD127.TMEMPC	Primary T cells effector/memory enriched from peripheral blood	CD4+_CD25int_CD127+_Tmem_Primary_Cells	Core	E045-H3K4me1.tagAlign.gz	18274815	210	0.216549	35	0.222262	1500	0.206371	1.04932	0.640474	0.208	0.177	0.327	62.8	0.794
H3K4me1	E046	BLD.CD56.PC	Primary Natural Killer cells from peripheral blood	CD56_Primary_Cells	Core	E046-H3K4me1.tagAlign.gz	22437596	195	0.410473	35	0.382407	1500	0.30692	1.33739	1.37181	0.635	0.67	0.725	66.8	0.756
H3K4me1	E047	BLD.CD8.NPC	Primary T killer naive cells from peripheral blood	CD8_Naive_Primary_Cells	Core	E047-H3K4me1.tagAlign.gz	30000000	310	0.327413	35	0.327443	1500	0.308264	1.06212	0.998396	0.282	0.292	0.439	68.5	0.86
H3K4me1	E048	BLD.CD8.MPC	Primary T killer memory cells from peripheral blood	CD8_Memory_Primary_Cells	Core	E048-H3K4me1.tagAlign.gz	30000000	220	0.316855	35	0.31908	1500	0.302116	1.04879	0.868847	0.215	0.195	0.368	68.8	0.847
H3K4me1	E049	STRM.CHON.MRW.DR.MSC	Mesenchymal Stem Cell Derived Chondrocyte Cultured Cells	Chondrocytes_from_Bone_Marrow_Derived_Mesenchymal_Stem_Cell_Cultured_Cells	Core	E049-H3K4me1.tagAlign.gz	30000000	200	0.351487	35	0.3437	1500	0.305879	1.14911	1.20587	0.506	0.527	0.67	54.9	0.814
H3K4me1	E050	BLD.MOB.CD34.PC.F	Primary hematopoietic stem cells G-CSF-mobilized Female	Mobilized_CD34_Primary_Cells_Female	Core	E050-H3K4me1.tagAlign.gz	30000000	205	0.360593	35	0.35798	1500	0.313161	1.15146	1.05832	0.525	0.558	0.636	62.3	0.854
H3K4me1	E051	BLD.MOB.CD34.PC.M	Primary hematopoietic stem cells G-CSF-mobilized Male	Mobilized_CD34_Primary_Cells_Male	Core	E051-H3K4me1.tagAlign.gz	30000000	140	0.408054	35	0.399756	1500	0.332121	1.22863	1.12269	0.641	0.693	0.74	65.2	0.858
H3K4me1	E052	MUS.SAT	Muscle Satellite Cultured Cells	Muscle_Satellite_Cultured_Cells	Core	E052-H3K4me1.tagAlign.gz	30000000	180	0.363256	35	0.350954	1500	0.307778	1.18025	1.28492	0.531	0.549	0.663	59	0.817
H3K4me1	E053	BRN.CRTX.DR.NRSPHR	Cortex derived primary cultured neurospheres	Neurosphere_Cultured_Cells_Cortex_Derived	Core	E053-H3K4me1.tagAlign.gz	30000000	195	0.321558	35	0.320945	1500	0.301014	1.06825	1.03076	0.289	0.262	0.466	44.5	0.721
H3K4me1	E054	BRN.GANGEM.DR.NRSPHR	Ganglion Eminence derived primary cultured neurospheres	Neurosphere_Cultured_Cells_Ganglionic_Eminence_Derived	Core	E054-H3K4me1.tagAlign.gz	30000000	170	0.307479	35	0.307972	1500	0.296691	1.03636	0.956304	0.157	0.044	0.373	46.8	0.751
H3K4me1	E055	SKIN.PEN.FRSK.FIB.01	Foreskin Fibroblast Primary Cells skin01	Penis_Foreskin_Fibroblast_Primary_Cells_skin01	Core	E055-H3K4me1.tagAlign.gz	30000000	175	0.329745	35	0.32628	1500	0.30904	1.06699	1.20099	0.297	0.312	0.545	57.2	0.814
H3K4me1	E056	SKIN.PEN.FRSK.FIB.02	Foreskin Fibroblast Primary Cells skin02	Penis_Foreskin_Fibroblast_Primary_Cells_skin02	Core	E056-H3K4me1.tagAlign.gz	30000000	185	0.315226	35	0.31396	1500	0.304918	1.03381	1.14007	0.148	0.072	0.432	53.7	0.794
H3K4me1	E057	SKIN.PEN.FRSK.KER.02	Foreskin Keratinocyte Primary Cells skin02	Penis_Foreskin_Keratinocyte_Primary_Cells_skin02	Core	E057-H3K4me1.tagAlign.gz	26736934	160	0.304108	35	0.300442	1500	0.281947	1.0786	1.1982	0.313	0.314	0.517	49.9	0.772
H3K4me1	E058	SKIN.PEN.FRSK.KER.03	Foreskin Keratinocyte Primary Cells skin03	Penis_Foreskin_Keratinocyte_Primary_Cells_skin03	Core	E058-H3K4me1.tagAlign.gz	30000000	175	0.337001	35	0.326924	1500	0.306485	1.09957	1.49308	0.315	0.32	0.525	51	0.782
H3K4me1	E059	SKIN.PEN.FRSK.MEL.01	Foreskin Melanocyte Primary Cells skin01	Penis_Foreskin_Melanocyte_Primary_Cells_skin01	Core	E059-H3K4me1.tagAlign.gz	29536082	160	0.30542	35	0.304107	1500	0.296357	1.03058	1.16929	0.116	0.031	0.353	41.9	0.675
H3K4me1	E061	SKIN.PEN.FRSK.MEL.03	Foreskin Melanocyte Primary Cells skin03	Penis_Foreskin_Melanocyte_Primary_Cells_skin03	Core	E061-H3K4me1.tagAlign.gz	30000000	185	0.33403	35	0.322953	1500	0.304117	1.09836	1.58804	0.298	0.3	0.519	36	0.619
H3K4me1	E062	BLD.PER.MONUC.PC	Primary mononuclear cells from peripheral blood	Peripheral_Blood_Mononuclear_Primary_Cells	Core	E062-H3K4me1.tagAlign.gz	30000000	145	0.309381	35	0.308873	1500	0.299485	1.03304	1.05413	0.124	0.074	0.317	40.9	0.597
H3K4me1	E063	FAT.ADIP.NUC	Adipose Nuclei	Adipose_Nuclei	Core	E063-H3K4me1.tagAlign.gz	30000000	200	0.33148	35	0.32874	1500	0.302245	1.09672	1.10341	0.35	0.361	0.542	58.4	0.808
H3K4me1	E065	HRT.AOR	Aorta	Aorta	Core	E065-H3K4me1.tagAlign.gz	16240982	125	0.20198	35	0.200071	1500	0.187814	1.07543	1.15582	0.187	0.115	0.383	23.3	0.421
H3K4me1	E066	LIV.ADLT	Liver	Adult_Liver	Core	E066-H3K4me1.tagAlign.gz	30000000	170	0.338634	35	0.33666	1500	0.307576	1.10098	1.06787	0.385	0.415	0.548	39.9	0.666
H3K4me1	E067	BRN.ANG.GYR	Brain Angular Gyrus	Brain_Angular_Gyrus	Core	E067-H3K4me1.tagAlign.gz	30000000	190	0.307913	35	0.308069	1500	0.297207	1.03602	0.985652	0.142	0.059	0.383	54.5	0.791
H3K4me1	E068	BRN.ANT.CAUD	Brain Anterior Caudate	Brain_Anterior_Caudate	Core	E068-H3K4me1.tagAlign.gz	30000000	185	0.310887	35	0.310839	1500	0.298443	1.0417	1.00392	0.17	0.09	0.428	55.4	0.806
H3K4me1	E069	BRN.CING.GYR	Brain Cingulate Gyrus	Brain_Cingulate_Gyrus	Core	E069-H3K4me1.tagAlign.gz	30000000	175	0.311227	35	0.310969	1500	0.298804	1.04158	1.02121	0.175	0.105	0.413	58.6	0.814
H3K4me1	E070	BRN.GRM.MTRX	Brain Germinal Matrix	Brain_Germinal_Matrix	Core	E070-H3K4me1.tagAlign.gz	23639036	170	0.262383	40	0.261917	1500	0.252911	1.03745	1.05178	0.18	0.103	0.394	41	0.658
H3K4me1	E071	BRN.HIPP.MID	Brain Hippocampus Middle	Brain_Hippocampus_Middle	Core	E071-H3K4me1.tagAlign.gz	30000000	265	0.318453	35	0.31706	1500	0.302	1.05448	1.09252	0.216	0.18	0.477	61.2	0.842
H3K4me1	E072	BRN.INF.TMP	Brain Inferior Temporal Lobe	Brain_Inferior_Temporal_Lobe	Core	E072-H3K4me1.tagAlign.gz	30000000	160	0.314765	35	0.312957	1500	0.299151	1.05219	1.13098	0.175	0.108	0.402	57.1	0.785
H3K4me1	E073	BRN.DL.PRFRNTL.CRTX	Brain_Dorsolateral_Prefrontal_Cortex	Brain_Mid_Frontal_Lobe	Core	E073-H3K4me1.tagAlign.gz	30000000	180	0.305209	35	0.306052	1500	0.296562	1.02916	0.91117	0.113	0.034	0.344	54.1	0.779
H3K4me1	E074	BRN.SUB.NIG	Brain Substantia Nigra	Brain_Substantia_Nigra	Core	E074-H3K4me1.tagAlign.gz	30000000	170	0.311264	35	0.31167	1500	0.298806	1.04169	0.968436	0.178	0.111	0.42	55.8	0.801
H3K4me1	E075	GI.CLN.MUC	Colonic Mucosa	Colonic_Mucosa	Core	E075-H3K4me1.tagAlign.gz	12035520	170	0.162957	35	0.164215	1500	0.151932	1.07256	0.897517	0.294	0.254	0.434	51	0.698
H3K4me1	E076	GI.CLN.SM.MUS	Colon Smooth Muscle	Colon_Smooth_Muscle	Core	E076-H3K4me1.tagAlign.gz	30000000	255	0.313707	35	0.313222	1500	0.300684	1.04331	1.03872	0.196	0.141	0.437	50.1	0.766
H3K4me1	E077	GI.DUO.MUC	Duodenum Mucosa	Duodenum_Mucosa	Core	E077-H3K4me1.tagAlign.gz	30000000	195	0.316455	35	0.314424	1500	0.299915	1.05515	1.14002	0.198	0.124	0.385	55.6	0.778
H3K4me1	E078	GI.DUO.SM.MUS	Duodenum Smooth Muscle	Duodenum_Smooth_Muscle	Core	E078-H3K4me1.tagAlign.gz	30000000	230	0.300718	35	0.301699	1500	0.290938	1.03362	0.908886	0.118	0.028	0.339	47.6	0.738
H3K4me1	E079	GI.ESO	Esophagus	Esophagus	Core	E079-H3K4me1.tagAlign.gz	19495504	135	0.246639	35	0.240583	1500	0.223056	1.10573	1.34556	0.28	0.235	0.495	40.5	0.627
H3K4me1	E080	ADRL.GLND.FET	Fetal Adrenal Gland	Fetal_Adrenal_Gland	Core	E080-H3K4me1.tagAlign.gz	27517966	160	0.333679	35	0.329258	1500	0.294428	1.13331	1.12694	0.439	0.452	0.613	48.1	0.725
H3K4me1	E081	BRN.FET.M	Fetal Brain Male	Fetal_Brain_Male	Core	E081-H3K4me1.tagAlign.gz	16684621	280	0.230205	35	0.21859	1500	0.202302	1.13793	1.71312	0.403	0.403	0.574	33.9	0.507
H3K4me1	E082	BRN.FET.F	Fetal Brain Female	Fetal_Brain_Female	Core	E082-H3K4me1.tagAlign.gz	30000000	200	0.301084	35	0.300409	1500	0.293653	1.02531	1.09992	0.09	0.005	0.297	41.1	0.671
H3K4me1	E083	HRT.FET	Fetal Heart	Fetal_Heart	Core	E083-H3K4me1.tagAlign.gz	30000000	255	0.333058	35	0.328801	1500	0.306972	1.08498	1.19498	0.362	0.392	0.57	36.8	0.653
H3K4me1	E084	GI.L.INT.FET	Fetal Intestine Large	Fetal_Intestine_Large	Core	E084-H3K4me1.tagAlign.gz	26696288	170	0.311666	35	0.308594	1500	0.287807	1.0829	1.14776	0.353	0.358	0.524	51.1	0.744
H3K4me1	E085	GI.S.INT.FET	Fetal Intestine Small	Fetal_Intestine_Small	Core	E085-H3K4me1.tagAlign.gz	28388130	150	0.32344	35	0.320126	1500	0.29914	1.08123	1.15793	0.341	0.34	0.519	52.6	0.758
H3K4me1	E086	KID.FET	Fetal Kidney	Fetal_Kidney	Core	E086-H3K4me1.tagAlign.gz	30000000	175	0.303712	35	0.304467	1500	0.293499	1.0348	0.931118	0.098	0.016	0.3	28.5	0.525
H3K4me1	E087	PANC.ISLT	Pancreatic Islets	Pancreatic_Islets	Core	E087-H3K4me1.tagAlign.gz	8446366	255	0.117047	35	0.11778	1500	0.107357	1.09026	0.929636	0.347	0.297	0.504	11.9	0.266
H3K4me1	E088	LNG.FET	Fetal Lung	Fetal_Lung	Core	E088-H3K4me1.tagAlign.gz	30000000	180	0.319043	35	0.31703	1500	0.299257	1.06612	1.11329	0.269	0.22	0.499	41.2	0.699
H3K4me1	E089	MUS.TRNK.FET	Fetal Muscle Trunk	Fetal_Muscle_Trunk	Core	E089-H3K4me1.tagAlign.gz	17656092	210	0.288632	35	0.268944	1500	0.237806	1.21373	1.63228	0.544	0.57	0.672	58.1	0.748
H3K4me1	E090	MUS.LEG.FET	Fetal Muscle Leg	Fetal_Muscle_Leg	Core	E090-H3K4me1.tagAlign.gz	30000000	160	0.358894	35	0.348587	1500	0.317441	1.13058	1.33091	0.431	0.442	0.602	63.4	0.836
H3K4me1	E091	PLCNT.FET	Placenta	Fetal_Placenta	Core	E091-H3K4me1.tagAlign.gz	26507300	180	0.317034	35	0.311977	1500	0.287316	1.10343	1.20506	0.352	0.359	0.537	50.1	0.723
H3K4me1	E092	GI.STMC.FET	Fetal Stomach	Fetal_Stomach	Core	E092-H3K4me1.tagAlign.gz	26642071	160	0.299711	35	0.298336	1500	0.279167	1.07359	1.07178	0.278	0.248	0.469	52.1	0.731
H3K4me1	E093	THYM.FET	Fetal Thymus	Fetal_Thymus	Core	E093-H3K4me1.tagAlign.gz	21287106	160	0.320951	35	0.307505	1500	0.268967	1.19327	1.34891	0.492	0.501	0.61	52.9	0.688
H3K4me1	E094	GI.STMC.GAST	Gastric	Gastric	Core	E094-H3K4me1.tagAlign.gz	25170873	140	0.283097	35	0.280114	1500	0.263977	1.07243	1.1848	0.174	0.101	0.409	35.7	0.613
H3K4me1	E095	HRT.VENT.L	Left Ventricle	Left_Ventricle	Core	E095-H3K4me1.tagAlign.gz	30000000	150	0.336058	35	0.32591	1500	0.305482	1.10009	1.49682	0.302	0.299	0.505	43.5	0.69
H3K4me1	E096	LNG	Lung	Lung	Core	E096-H3K4me1.tagAlign.gz	14290186	140	0.204382	35	0.195838	1500	0.179279	1.14002	1.51596	0.408	0.401	0.589	42.9	0.665
H3K4me1	E097	OVRY	Ovary	Ovary	Core	E097-H3K4me1.tagAlign.gz	26603106	105	0.303065	45	0.298167	1500	0.276986	1.09415	1.23124	0.261	0.246	0.455	30.6	0.539
H3K4me1	E098	PANC	Pancreas	Pancreas	Core	E098-H3K4me1.tagAlign.gz	27782431	145	0.323152	35	0.311605	1500	0.288088	1.12171	1.49098	0.289	0.268	0.485	47	0.683
H3K4me1	E099	PLCNT.AMN	Placenta Amnion	Placenta_Amnion	Core	E099-H3K4me1.tagAlign.gz	22250049	225	0.248663	35	0.248361	1500	0.240555	1.0337	1.03859	0.157	0.071	0.339	39.7	0.644
H3K4me1	E100	MUS.PSOAS	Psoas Muscle	Psoas_Muscle	Core	E100-H3K4me1.tagAlign.gz	26803294	150	0.298036	35	0.29398	1500	0.278102	1.07168	1.25549	0.208	0.16	0.434	31.2	0.572
H3K4me1	E101	GI.RECT.MUC.29	Rectal Mucosa Donor 29	Rectal_Mucosa.Donor_29	Core	E101-H3K4me1.tagAlign.gz	22245786	165	0.252406	35	0.249663	1500	0.238912	1.05648	1.25515	0.165	0.089	0.333	53.8	0.741
H3K4me1	E102	GI.RECT.MUC.31	Rectal Mucosa Donor 31	Rectal_Mucosa.Donor_31	Core	E102-H3K4me1.tagAlign.gz	23897111	155	0.276793	35	0.27494	1500	0.258609	1.07032	1.11349	0.276	0.249	0.442	57.5	0.767
H3K4me1	E103	GI.RECT.SM.MUS	Rectal Smooth Muscle	Rectal_Smooth_Muscle	Core	E103-H3K4me1.tagAlign.gz	30000000	165	0.309698	35	0.309659	1500	0.297119	1.04234	1.00315	0.154	0.086	0.337	48.2	0.698
H3K4me1	E104	HRT.ATR.R	Right Atrium	Right_Atrium	Core	E104-H3K4me1.tagAlign.gz	17828160	130	0.237005	35	0.22969	1500	0.212209	1.11684	1.41847	0.369	0.345	0.557	38.2	0.641
H3K4me1	E105	HRT.VNT.R	Right Ventricle	Right_Ventricle	Core	E105-H3K4me1.tagAlign.gz	30000000	145	0.313922	35	0.314263	1500	0.29864	1.05117	0.97817	0.155	0.075	0.393	46.8	0.719
H3K4me1	E106	GI.CLN.SIG	Sigmoid Colon	Sigmoid_Colon	Core	E106-H3K4me1.tagAlign.gz	30000000	150	0.309854	35	0.308751	1500	0.296744	1.04418	1.09185	0.134	0.048	0.354	38	0.64
H3K4me1	E107	MUS.SKLT.M	Skeletal Muscle Male	Skeletal_Muscle_Male	Core	E107-H3K4me1.tagAlign.gz	26941724	160	0.32514	35	0.313803	1500	0.290928	1.1176	1.49557	0.36	0.383	0.557	62.8	0.81
H3K4me1	E108	MUS.SKLT.F	Skeletal Muscle Female	Skeletal_Muscle_Female	Core	E108-H3K4me1.tagAlign.gz	29822180	195	0.346237	35	0.336176	1500	0.312407	1.10829	1.42325	0.356	0.379	0.553	59.8	0.788
H3K4me1	E109	GI.S.INT	Small Intestine	Small_Intestine	Core	E109-H3K4me1.tagAlign.gz	17317783	165	0.206025	35	0.205278	1500	0.19709	1.04534	1.09132	0.19	0.111	0.419	30.4	0.55
H3K4me1	E110	GI.STMC.MUC	Stomach Mucosa	Stomach_Mucosa	Core	E110-H3K4me1.tagAlign.gz	27797421	240	0.303088	35	0.302296	1500	0.287741	1.05334	1.05441	0.242	0.194	0.464	44.2	0.699
H3K4me1	E111	GI.STMC.MUS	Stomach Smooth Muscle	Stomach_Smooth_Muscle	Core	E111-H3K4me1.tagAlign.gz	13548731	170	0.185166	35	0.182561	1500	0.169043	1.09538	1.1927	0.339	0.332	0.503	58.8	0.781
H3K4me1	E112	THYM	Thymus	Thymus	Core	E112-H3K4me1.tagAlign.gz	15644994	165	0.198491	35	0.199651	1500	0.187055	1.06113	0.907915	0.248	0.221	0.382	48.2	0.672
H3K4me1	E113	SPLN	Spleen	Spleen	Core	E113-H3K4me1.tagAlign.gz	22823512	135	0.271924	35	0.269242	1500	0.251447	1.08143	1.15067	0.234	0.203	0.462	44.9	0.679
H3K4me1	E114	LNG.A549.ETOH002.CNCR	A549 EtOH 0.02pct Lung Carcinoma Cell Line	A549_EtOH_0.02pct_Lung_Carcinoma	Core	E114-H3K4me1.tagAlign.gz	30000000	210	0.333093	35	0.33285	1500	0.314511	1.05908	1.01322	0.289	0.278	0.497	46.9	0.723
H3K4me1	E115	BLD.DND41.CNCR	Dnd41 TCell Leukemia Cell Line	Dnd41_TCell_Leukemia	Core	E115-H3K4me1.tagAlign.gz	30000000	155	0.451131	35	0.443193	1500	0.349432	1.29104	1.08466	0.555	0.573	0.628	52.1	0.636
H3K4me1	E116	BLD.GM12878	GM12878 Lymphoblastoid Cell Line	GM12878_Lymphoblastoid	Core	E116-H3K4me1.tagAlign.gz	30000000	205	0.339002	35	0.338985	1500	0.313057	1.08288	1.00064	0.363	0.372	0.517	40.3	0.651
H3K4me1	E117	CRVX.HELAS3.CNCR	HeLa-S3 Cervical Carcinoma Cell Line	HeLa-S3_Cervical_Carcinoma	Core	E117-H3K4me1.tagAlign.gz	30000000	210	0.340835	35	0.33928	1500	0.310069	1.09922	1.05323	0.335	0.325	0.453	53.4	0.697
H3K4me1	E118	LIV.HEPG2.CNCR	HepG2 Hepatocellular Carcinoma Cell Line	HepG2_Hepatocellular_Carcinoma	Core	E118-H3K4me1.tagAlign.gz	30000000	225	0.381175	35	0.37916	1500	0.335886	1.13484	1.04657	0.556	0.604	0.703	32.2	0.592
H3K4me1	E119	BRST.HMEC	HMEC Mammary Epithelial Primary Cells	HMEC_Mammary_Epithelial	Core	E119-H3K4me1.tagAlign.gz	30000000	190	0.352834	35	0.345516	1500	0.307435	1.14767	1.19218	0.442	0.453	0.573	57.8	0.795
H3K4me1	E120	MUS.HSMM	HSMM Skeletal Muscle Myoblasts Cell Line	HSMM_Skeletal_Muscle_Myoblasts	Core	E120-H3K4me1.tagAlign.gz	19710638	170	0.257352	35	0.255011	1500	0.229627	1.12074	1.09223	0.434	0.434	0.58	55.8	0.788
H3K4me1	E121	MUS.HSMMT	HSMM cell derived Skeletal Muscle Myotubes Cell Line	HSMMtube_Skeletal_Muscle_Myotubes_Derived_from_HSMM	Core	E121-H3K4me1.tagAlign.gz	24028231	190	0.28628	35	0.28334	1500	0.26318	1.08777	1.14583	0.349	0.341	0.55	48.2	0.743
H3K4me1	E122	VAS.HUVEC	HUVEC Umbilical Vein Endothelial Cells Cell Line	HUVEC_Umbilical_Vein_Endothelial_Cells	Core	E122-H3K4me1.tagAlign.gz	27375524	195	0.368597	30	0.361329	1500	0.305329	1.20721	1.12977	0.559	0.578	0.643	52.4	0.733
H3K4me1	E123	BLD.K562.CNCR	K562 Leukemia Cell Line	K562_Leukemia	Core	E123-H3K4me1.tagAlign.gz	25818317	175	0.330802	35	0.327318	1500	0.290495	1.13875	1.09462	0.443	0.46	0.587	36.2	0.574
H3K4me1	E124	BLD.CD14.MONO	Monocytes-CD14+ RO01746 Cell Line	Monocytes-CD14+_RO01746	Core	E124-H3K4me1.tagAlign.gz	19394484	285	0.327936	35	0.319021	1500	0.267478	1.22603	1.17296	0.704	0.738	0.778	65.5	0.837
H3K4me1	E125	BRN.NHA	NH-A Astrocytes Cell Line	NH-A_Astrocytes	Core	E125-H3K4me1.tagAlign.gz	23629737	180	0.286557	35	0.284147	1500	0.25832	1.10931	1.09333	0.374	0.374	0.527	60.7	0.825
H3K4me1	E126	SKIN.NHDFAD	NHDF-Ad Adult Dermal Fibroblast Primary Cells	NHDF-Ad_Adult_Dermal_Fibroblasts	Core	E126-H3K4me1.tagAlign.gz	30000000	150	0.343574	35	0.338509	1500	0.309131	1.11142	1.17241	0.402	0.41	0.57	52.5	0.766
H3K4me1	E127	SKIN.NHEK	NHEK-Epidermal Keratinocyte Primary Cells	NHEK-Epidermal_Keratinocytes	Core	E127-H3K4me1.tagAlign.gz	23253236	185	0.322558	35	0.315737	1500	0.26564	1.21427	1.13616	0.583	0.614	0.683	59.6	0.817
H3K4me1	E128	LNG.NHLF	NHLF Lung Fibroblast Primary Cells	NHLF_Lung_Fibroblasts	Core	E128-H3K4me1.tagAlign.gz	18295920	145	0.234798	35	0.233104	1500	0.214282	1.09574	1.08999	0.363	0.355	0.513	53.6	0.751
H3K4me1	E129	BONE.OSTEO	Osteoblast Primary Cells	Osteoblasts	Core	E129-H3K4me1.tagAlign.gz	30000000	190	0.34873	35	0.341104	1500	0.306733	1.13692	1.22188	0.436	0.44	0.58	62.6	0.843
H3K4me2	E003	ESC.H1	H1 Cell Line	H1_Cell_Line	Class1	E003-H3K4me2.tagAlign.gz	25696661	115	0.451652	45	0.38801	1500	0.269721	1.67451	1.53802	0.59	0.59	0.64	72.3	0.814
H3K4me2	E004	ESDR.H1.BMP4.MESO	H1 BMP4 Derived Mesendoderm Cultured Cells	H1_BMP4_Derived_Mesendoderm_Cultured_Cells	Class1	E004-H3K4me2.tagAlign.gz	45000000	125	0.40202	35	0.398255	1500	0.378788	1.06133	1.19336	0.16	0.11	0.26	70.2	0.787
H3K4me2	E005	ESDR.H1.BMP4.TROP	H1 BMP4 Derived Trophoblast Cultured Cells	H1_BMP4_Derived_Trophoblast_Cultured_Cells	Class1	E005-H3K4me2.tagAlign.gz	45000000	130	0.428025	35	0.419627	1500	0.377574	1.13362	1.19971	0.25	0.19	0.33	79.2	0.88
H3K4me2	E006	ESDR.H1.MSC	H1 Derived Mesenchymal Stem Cells	H1_Derived_Mesenchymal_Stem_Cells	Class1	E006-H3K4me2.tagAlign.gz	45000000	110	0.2751	35	0.263686	1500	0.239746	1.14746	1.47681	0.29	0.17	0.35	67.6	0.754
H3K4me2	E007	ESDR.H1.NEUR.PROG	H1 Derived Neuronal Progenitor Cultured Cells	H1_Derived_Neuronal_Progenitor_Cultured_Cells	Class1	E007-H3K4me2.tagAlign.gz	6700849	135	0.133648	35	0.1281	1500	0.0866153	1.54301	1.13375	0.5	0.42	0.5	74.7	0.795
H3K4me2	E008	ESC.H9	H9 Cell Line	H9_Cell_Line	Class1	E008-H3K4me2.tagAlign.gz	38374379	110	0.413586	35	0.401673	1500	0.340877	1.2133	1.19595	0.28	0.26	0.34	82.3	0.894
H3K4me2	E017	LNG.IMR90	IMR90 fetal lung fibroblasts Cell Line	IMR90_Cell_Line	Class1	E017-H3K4me2.tagAlign.gz	41818219	130	0.590318	45	0.505494	1500	0.347497	1.69877	1.53687	0.68	0.69	0.74	75.7	0.891
H3K4me2	E052	MUS.SAT	Muscle Satellite Cultured Cells	Muscle_Satellite_Cultured_Cells	Class1	E052-H3K4me2.tagAlign.gz	45000000	175	0.556446	35	0.511949	1500	0.382055	1.45645	1.34256	0.62	0.62	0.65	89.3	0.955
H3K4me2	E114	LNG.A549.ETOH002.CNCR	A549 EtOH 0.02pct Lung Carcinoma Cell Line	A549_EtOH_0.02pct_Lung_Carcinoma	Class1	E114-H3K4me2.tagAlign.gz	45000000	210	0.487422	35	0.473971	1500	0.392929	1.24048	1.16597	0.49	0.47	0.54	77.3	0.897
H3K4me2	E115	BLD.DND41.CNCR	Dnd41 TCell Leukemia Cell Line	Dnd41_TCell_Leukemia	Class1	E115-H3K4me2.tagAlign.gz	25939212	150	0.577363	40	0.551206	1500	0.348505	1.65668	1.12904	0.72	0.73	0.75	87.7	0.928
H3K4me2	E116	BLD.GM12878	GM12878 Lymphoblastoid Cell Line	GM12878_Lymphoblastoid	Class1	E116-H3K4me2.tagAlign.gz	14329553	185	0.245226	35	0.243154	1500	0.198748	1.23385	1.04666	0.59	0.6	0.65	65.7	0.796
H3K4me2	E117	CRVX.HELAS3.CNCR	HeLa-S3 Cervical Carcinoma Cell Line	HeLa-S3_Cervical_Carcinoma	Class1	E117-H3K4me2.tagAlign.gz	44139351	195	0.447445	35	0.442472	1500	0.382266	1.17051	1.0826	0.3	0.3	0.37	78.4	0.886
H3K4me2	E118	LIV.HEPG2.CNCR	HepG2 Hepatocellular Carcinoma Cell Line	HepG2_Hepatocellular_Carcinoma	Class1	E118-H3K4me2.tagAlign.gz	26829454	170	0.447358	35	0.430454	1500	0.313016	1.42919	1.14394	0.65	0.67	0.71	75	0.86
H3K4me2	E119	BRST.HMEC	HMEC Mammary Epithelial Primary Cells	HMEC_Mammary_Epithelial	Class1	E119-H3K4me2.tagAlign.gz	27331151	155	0.3963	35	0.383228	1500	0.292276	1.35591	1.14373	0.54	0.54	0.6	81.3	0.882
H3K4me2	E120	MUS.HSMM	HSMM Skeletal Muscle Myoblasts Cell Line	HSMM_Skeletal_Muscle_Myoblasts	Class1	E120-H3K4me2.tagAlign.gz	29669593	160	0.375265	35	0.366785	1500	0.30237	1.24108	1.13165	0.45	0.45	0.53	65.8	0.803
H3K4me2	E121	MUS.HSMMT	HSMM cell derived Skeletal Muscle Myotubes Cell Line	HSMMtube_Skeletal_Muscle_Myotubes_Derived_from_HSMM	Class1	E121-H3K4me2.tagAlign.gz	24138688	195	0.334746	35	0.326151	1500	0.267988	1.24911	1.14779	0.45	0.44	0.54	80.1	0.913
H3K4me2	E122	VAS.HUVEC	HUVEC Umbilical Vein Endothelial Cells Cell Line	HUVEC_Umbilical_Vein_Endothelial_Cells	Class1	E122-H3K4me2.tagAlign.gz	24318089	190	0.375562	35	0.363106	1500	0.275837	1.36154	1.14273	0.53	0.54	0.58	74.7	0.879
H3K4me2	E123	BLD.K562.CNCR	K562 Leukemia Cell Line	K562_Leukemia	Class1	E123-H3K4me2.tagAlign.gz	19176820	165	0.407707	35	0.374253	1500	0.258961	1.57439	1.29016	0.61	0.6	0.65	79.1	0.851
H3K4me2	E124	BLD.CD14.MONO	Monocytes-CD14+ RO01746 Cell Line	Monocytes-CD14+_RO01746	Class1	E124-H3K4me2.tagAlign.gz	23123498	225	0.52431	40	0.481624	1500	0.307856	1.7031	1.24565	0.75	0.76	0.78	83.2	0.875
H3K4me2	E125	BRN.NHA	NH-A Astrocytes Cell Line	NH-A_Astrocytes	Class1	E125-H3K4me2.tagAlign.gz	45000000	205	0.554196	40	0.51772	1500	0.390178	1.42037	1.28599	0.64	0.63	0.67	88.2	0.963
H3K4me2	E126	SKIN.NHDFAD	NHDF-Ad Adult Dermal Fibroblast Primary Cells	NHDF-Ad_Adult_Dermal_Fibroblasts	Class1	E126-H3K4me2.tagAlign.gz	39640284	150	0.453028	35	0.43724	1500	0.358214	1.26468	1.19977	0.45	0.45	0.53	77	0.877
H3K4me2	E127	SKIN.NHEK	NHEK-Epidermal Keratinocyte Primary Cells	NHEK-Epidermal_Keratinocytes	Class1	E127-H3K4me2.tagAlign.gz	23039663	180	0.373325	35	0.358508	1500	0.265016	1.40869	1.15848	0.61	0.63	0.67	76.5	0.89
H3K4me2	E128	LNG.NHLF	NHLF Lung Fibroblast Primary Cells	NHLF_Lung_Fibroblasts	Class1	E128-H3K4me2.tagAlign.gz	17466519	165	0.261418	35	0.255461	1500	0.21156	1.23567	1.13569	0.48	0.47	0.55	73.6	0.843
H3K4me2	E129	BONE.OSTEO	Osteoblast Primary Cells	Osteoblasts	Class1	E129-H3K4me2.tagAlign.gz	40797599	190	0.497272	35	0.473405	1500	0.363932	1.36639	1.21802	0.51	0.52	0.59	84.6	0.937
H3K4me3	E001	ESC.I3	ES-I3 Cell Line	ES-I3_Cell_Line	Core	E001-H3K4me3.tagAlign.gz	21464084	180	0.311474	35	0.29357	1500	0.238389	1.30658	1.32447	0.357	0.34	0.415	80.9	0.866
H3K4me3	E002	ESC.WA7	ES-WA7 Cell Line	ES-WA7_Cell_Line	Core	E002-H3K4me3.tagAlign.gz	6147367	170	0.116058	35	0.104561	1500	0.0847133	1.37	1.57929	0.406	0.338	0.485	51.3	0.572
H3K4me3	E003	ESC.H1	H1 Cell Line	H1_Cell_Line	Core	E003-H3K4me3.tagAlign.gz	30000000	135	0.583423	45	0.528833	1500	0.263273	2.21604	1.20557	0.547	0.552	0.564	91	0.951
H3K4me3	E004	ESDR.H1.BMP4.MESO	H1 BMP4 Derived Mesendoderm Cultured Cells	H1_BMP4_Derived_Mesendoderm_Cultured_Cells	Core	E004-H3K4me3.tagAlign.gz	30000000	125	0.332057	35	0.327017	1500	0.291569	1.13886	1.14217	0.155	0.146	0.194	70.1	0.863
H3K4me3	E005	ESDR.H1.BMP4.TROP	H1 BMP4 Derived Trophoblast Cultured Cells	H1_BMP4_Derived_Trophoblast_Cultured_Cells	Core	E005-H3K4me3.tagAlign.gz	30000000	140	0.449121	45	0.406538	1500	0.261532	1.71727	1.29367	0.301	0.264	0.419	65.8	0.879
H3K4me3	E006	ESDR.H1.MSC	H1 Derived Mesenchymal Stem Cells	H1_Derived_Mesenchymal_Stem_Cells	Core	E006-H3K4me3.tagAlign.gz	20680231	110	0.392029	45	0.36108	1500	0.204276	1.91911	1.19737	0.356	0.294	0.457	60.7	0.788
H3K4me3	E007	ESDR.H1.NEUR.PROG	H1 Derived Neuronal Progenitor Cultured Cells	H1_Derived_Neuronal_Progenitor_Cultured_Cells	Core	E007-H3K4me3.tagAlign.gz	30000000	130	0.363499	35	0.349372	1500	0.27822	1.30652	1.19854	0.205	0.186	0.292	67.2	0.882
H3K4me3	E008	ESC.H9	H9 Cell Line	H9_Cell_Line	Core	E008-H3K4me3.tagAlign.gz	23380403	130	0.494696	45	0.437372	1500	0.236136	2.09496	1.28486	0.482	0.477	0.497	88.9	0.93
H3K4me3	E009	ESDR.H9.NEUR.PROG	H9 Derived Neuronal Progenitor Cultured Cells	H9_Derived_Neuronal_Progenitor_Cultured_Cells	Core	E009-H3K4me3.tagAlign.gz	30000000	125	0.562575	45	0.545335	1500	0.3208	1.75366	1.07678	0.482	0.485	0.498	86.1	0.951
H3K4me3	E010	ESDR.H9.NEUR	H9 Derived Neuron Cultured Cells	H9_Derived_Neuron_Cultured_Cells	Core	E010-H3K4me3.tagAlign.gz	30000000	140	0.577555	45	0.553044	1500	0.337947	1.70901	1.11395	0.523	0.527	0.539	84.9	0.945
H3K4me3	E011	ESDR.CD184.ENDO	hESC Derived CD184+ Endoderm Cultured Cells	hESC_Derived_CD184+_Endoderm_Cultured_Cells	Core	E011-H3K4me3.tagAlign.gz	30000000	240	0.367174	35	0.365915	1500	0.308738	1.18928	1.02201	0.306	0.283	0.453	76.6	0.837
H3K4me3	E012	ESDR.CD56.ECTO	hESC Derived CD56+ Ectoderm Cultured Cells	hESC_Derived_CD56+_Ectoderm_Cultured_Cells	Core	E012-H3K4me3.tagAlign.gz	17283261	195	0.411448	35	0.381522	1500	0.218553	1.8826	1.18363	0.49	0.488	0.507	88	0.928
H3K4me3	E013	ESDR.CD56.MESO	hESC Derived CD56+ Mesoderm Cultured Cells	hESC_Derived_CD56+_Mesoderm_Cultured_Cells	Core	E013-H3K4me3.tagAlign.gz	10585491	235	0.499027	40	0.429347	1500	0.206034	2.42206	1.31202	0.809	0.812	0.809	87.6	0.929
H3K4me3	E014	ESC.HUES48	HUES48 Cell Line	HUES48_Cell_Line	Core	E014-H3K4me3.tagAlign.gz	30000000	185	0.48683	35	0.441403	1500	0.301439	1.61502	1.32456	0.459	0.46	0.514	92.3	0.972
H3K4me3	E015	ESC.HUES6	HUES6 Cell Line	HUES6_Cell_Line	Core	E015-H3K4me3.tagAlign.gz	30000000	175	0.55722	35	0.498337	1500	0.304667	1.82895	1.30404	0.59	0.595	0.63	91.3	0.969
H3K4me3	E016	ESC.HUES64	HUES64 Cell Line	HUES64_Cell_Line	Core	E016-H3K4me3.tagAlign.gz	30000000	185	0.622331	35	0.545632	1500	0.307982	2.02067	1.32274	0.646	0.655	0.68	93.6	0.983
H3K4me3	E017	LNG.IMR90	IMR90 fetal lung fibroblasts Cell Line	IMR90_Cell_Line	Core	E017-H3K4me3.tagAlign.gz	28065544	140	0.798739	45	0.668913	1500	0.250194	3.19248	1.31005	0.841	0.848	0.852	87.1	0.936
H3K4me3	E018	IPSC.15b	iPS-15b Cell Line	iPS-15b_Cell_Line	Core	E018-H3K4me3.tagAlign.gz	21079889	170	0.352164	35	0.330397	1500	0.2467	1.4275	1.26006	0.401	0.396	0.445	87	0.935
H3K4me3	E019	IPSC.18	iPS-18 Cell Line	iPS-18_Cell_Line	Core	E019-H3K4me3.tagAlign.gz	30000000	215	0.419814	35	0.397805	1500	0.303644	1.38259	1.23375	0.373	0.368	0.422	92	0.971
H3K4me3	E020	IPSC.20B	iPS-20b Cell Line	iPS-20b_Cell_Line	Core	E020-H3K4me3.tagAlign.gz	30000000	195	0.440952	35	0.414826	1500	0.313953	1.40452	1.25899	0.418	0.411	0.479	89.8	0.948
H3K4me3	E021	IPSC.DF.6.9	iPS DF 6.9 Cell Line	iPS_DF_6.9_Cell_Line	Core	E021-H3K4me3.tagAlign.gz	30000000	135	0.445169	45	0.423358	1500	0.279439	1.59308	1.15155	0.324	0.317	0.364	85	0.917
H3K4me3	E022	IPSC.DF.19.11	iPS DF 19.11 Cell Line	iPS_DF_19.11_Cell_Line	Core	E022-H3K4me3.tagAlign.gz	30000000	120	0.508636	45	0.474583	1500	0.262305	1.9391	1.16042	0.38	0.368	0.427	82.6	0.907
H3K4me3	E023	FAT.MSC.DR.ADIP	Mesenchymal Stem Cell Derived Adipocyte Cultured Cells	Mesenchymal_Stem_Cell_Derived_Adipocyte_Cultured_Cells	Core	E023-H3K4me3.tagAlign.gz	30000000	190	0.44272	35	0.417493	1500	0.314303	1.40858	1.24447	0.442	0.427	0.523	87.5	0.959
H3K4me3	E024	ESC.4STAR	ES-UCSF4 Cell Line	4star	Core	E024-H3K4me3.tagAlign.gz	30000000	160	0.386887	40	0.357566	1500	0.290549	1.33157	1.43753	0.222	0.219	0.25	83.6	0.874
H3K4me3	E025	FAT.ADIP.DR.MSC	Adipose Derived Mesenchymal Stem Cell Cultured Cells	Adipose_Derived_Mesenchymal_Stem_Cell_Cultured_Cells	Core	E025-H3K4me3.tagAlign.gz	30000000	200	0.442172	35	0.420589	1500	0.315664	1.40077	1.20571	0.452	0.44	0.525	88.5	0.956
H3K4me3	E026	STRM.MRW.MSC	Bone Marrow Derived Cultured Mesenchymal Stem Cells	Bone_Marrow_Derived_Mesenchymal_Stem_Cell_Cultured_Cells	Core	E026-H3K4me3.tagAlign.gz	30000000	175	0.468134	35	0.434815	1500	0.313396	1.49375	1.27441	0.473	0.463	0.528	89.2	0.961
H3K4me3	E027	BRST.MYO	Breast Myoepithelial Primary Cells	Breast_Myoepithelial_Cells	Core	E027-H3K4me3.tagAlign.gz	17962840	165	0.419444	40	0.395014	1500	0.237533	1.76583	1.15512	0.539	0.534	0.549	83.2	0.914
H3K4me3	E028	BRST.HMEC.35	Breast variant Human Mammary Epithelial Cells (vHMEC)	Breast_vHMEC	Core	E028-H3K4me3.tagAlign.gz	6978187	170	0.2367	45	0.207126	1500	0.113616	2.08332	1.31627	0.535	0.479	0.524	77.2	0.882
H3K4me3	E029	BLD.CD14.PC	Primary monocytes from peripheral blood	CD14_Primary_Cells	Core	E029-H3K4me3.tagAlign.gz	20973878	200	0.531106	45	0.449516	1500	0.230014	2.30902	1.3717	0.457	0.457	0.469	87	0.894
H3K4me3	E030	BLD.CD15.PC	Primary neutrophils from peripheral blood	CD15_Primary_Cells	Core	E030-H3K4me3.tagAlign.gz	7134392	210	0.366529	40	0.323858	1500	0.165637	2.21285	1.26969	0.796	0.795	0.811	73.7	0.861
H3K4me3	E031	BLD.CD19.CPC	Primary B cells from cord blood	CD19_Primary_Cells_Cord_BI	Core	E031-H3K4me3.tagAlign.gz	12954668	155	0.261668	40	0.249732	1500	0.173578	1.50749	1.15674	0.404	0.376	0.418	77.5	0.796
H3K4me3	E032	BLD.CD19.PPC	Primary B cells from peripheral blood	CD19_Primary_Cells_Peripheral_UW	Core	E032-H3K4me3.tagAlign.gz	25182460	205	0.454834	45	0.398902	1500	0.24842	1.83091	1.37169	0.332	0.331	0.348	81.6	0.911
H3K4me3	E033	BLD.CD3.CPC	Primary T cells from cord blood	CD3_Primary_Cells_Cord_BI	Core	E033-H3K4me3.tagAlign.gz	15496888	175	0.292188	40	0.283593	1500	0.202128	1.44556	1.1055	0.407	0.396	0.449	79.3	0.822
H3K4me3	E034	BLD.CD3.PPC	Primary T cells from peripheral blood	CD3_Primary_Cells_Peripheral_UW	Core	E034-H3K4me3.tagAlign.gz	29358683	195	0.564349	45	0.493398	1500	0.277321	2.035	1.32836	0.42	0.422	0.439	87.2	0.95
H3K4me3	E035	BLD.CD34.PC	Primary hematopoietic stem cells	CD34_Primary_Cells	Core	E035-H3K4me3.tagAlign.gz	10711857	175	0.241102	40	0.231329	1500	0.153557	1.57012	1.12567	0.467	0.427	0.478	83.2	0.872
H3K4me3	E036	BLD.CD34.CC	Primary hematopoietic stem cells short term culture	CD34_Cultured_Cells	Core	E036-H3K4me3.tagAlign.gz	30000000	160	0.415238	35	0.406983	1500	0.299164	1.388	1.07656	0.318	0.307	0.361	82.7	0.922
H3K4me3	E037	BLD.CD4.MPC	Primary T helper memory cells from peripheral blood 2	CD4_Memory_Primary_Cells	Core	E037-H3K4me3.tagAlign.gz	30000000	225	0.313038	35	0.316553	1500	0.291307	1.0746	0.860792	0.143	0.132	0.19	82.3	0.926
H3K4me3	E038	BLD.CD4.NPC	Primary T helper naive cells from peripheral blood	CD4_Naive_Primary_Cells	Core	E038-H3K4me3.tagAlign.gz	30000000	225	0.32457	35	0.32328	1500	0.294302	1.10285	1.04451	0.175	0.165	0.23	82.8	0.915
H3K4me3	E039	BLD.CD4.CD25M.CD45RA.NPC	Primary T helper naive cells from peripheral blood	CD4+_CD25-_CD45RA+_Naive_Primary_Cells	Core	E039-H3K4me3.tagAlign.gz	22287960	220	0.342336	35	0.331236	1500	0.2427	1.41053	1.12538	0.342	0.338	0.384	86.8	0.957
H3K4me3	E040	BLD.CD4.CD25M.CD45RO.MPC	Primary T helper memory cells from peripheral blood 1	CD4+_CD25-_CD45RO+_Memory_Primary_Cells	Core	E040-H3K4me3.tagAlign.gz	17101591	210	0.213025	35	0.217572	1500	0.194207	1.0969	0.805392	0.188	0.161	0.247	76.4	0.861
H3K4me3	E041	BLD.CD4.CD25M.IL17M.PL.TPC	Primary T helper cells PMA-I stimulated	CD4+_CD25-_IL17-_PMA-Ionomycin_stimulated_MACS_purified_Th_Primary_Cells	Core	E041-H3K4me3.tagAlign.gz	30000000	240	0.384412	35	0.376121	1500	0.311652	1.23347	1.12861	0.31	0.312	0.362	86.3	0.912
H3K4me3	E042	BLD.CD4.CD25M.IL17P.PL.TPC	Primary T helper 17 cells PMA-I stimulated	CD4+_CD25-_IL17+_PMA-Ionomcyin_stimulated_Th17_Primary_Cells	Core	E042-H3K4me3.tagAlign.gz	30000000	205	0.348807	35	0.342271	1500	0.295591	1.18003	1.14002	0.229	0.222	0.275	84.9	0.937
H3K4me3	E043	BLD.CD4.CD25M.TPC	Primary T helper cells from peripheral blood	CD4+_CD25-_Th_Primary_Cells	Core	E043-H3K4me3.tagAlign.gz	15739497	240	0.375433	35	0.337438	1500	0.203165	1.84792	1.28296	0.481	0.476	0.498	89.3	0.965
H3K4me3	E044	BLD.CD4.CD25.CD127M.TREGPC	Primary T regulatory cells from peripheral blood	CD4+_CD25+_CD127-_Treg_Primary_Cells	Core	E044-H3K4me3.tagAlign.gz	15079580	230	0.409536	35	0.364746	1500	0.203636	2.01112	1.278	0.559	0.56	0.578	88.2	0.965
H3K4me3	E045	BLD.CD4.CD25I.CD127.TMEMPC	Primary T cells effector/memory enriched from peripheral blood	CD4+_CD25int_CD127+_Tmem_Primary_Cells	Core	E045-H3K4me3.tagAlign.gz	23906500	220	0.305563	35	0.302182	1500	0.248375	1.23025	1.06283	0.232	0.223	0.274	86.3	0.951
H3K4me3	E046	BLD.CD56.PC	Primary Natural Killer cells from peripheral blood	CD56_Primary_Cells	Core	E046-H3K4me3.tagAlign.gz	21939444	195	0.458344	45	0.395251	1500	0.226793	2.02098	1.37453	0.372	0.37	0.387	83.6	0.916
H3K4me3	E047	BLD.CD8.NPC	Primary T killer naive cells from peripheral blood	CD8_Naive_Primary_Cells	Core	E047-H3K4me3.tagAlign.gz	30000000	210	0.361404	35	0.347339	1500	0.290118	1.24572	1.24581	0.217	0.211	0.259	84.5	0.935
H3K4me3	E048	BLD.CD8.MPC	Primary T killer memory cells from peripheral blood	CD8_Memory_Primary_Cells	Core	E048-H3K4me3.tagAlign.gz	30000000	225	0.310349	35	0.311951	1500	0.293641	1.0569	0.912478	0.134	0.118	0.194	78.5	0.875
H3K4me3	E049	STRM.CHON.MRW.DR.MSC	Mesenchymal Stem Cell Derived Chondrocyte Cultured Cells	Chondrocytes_from_Bone_Marrow_Derived_Mesenchymal_Stem_Cell_Cultured_Cells	Core	E049-H3K4me3.tagAlign.gz	30000000	185	0.541922	35	0.490423	1500	0.316599	1.71169	1.29627	0.576	0.572	0.619	89.8	0.969
H3K4me3	E050	BLD.MOB.CD34.PC.F	Primary hematopoietic stem cells G-CSF-mobilized Female	Mobilized_CD34_Primary_Cells_Female	Core	E050-H3K4me3.tagAlign.gz	30000000	175	0.450852	35	0.428857	1500	0.287724	1.56696	1.15585	0.382	0.377	0.411	89.2	0.957
H3K4me3	E051	BLD.MOB.CD34.PC.M	Primary hematopoietic stem cells G-CSF-mobilized Male	Mobilized_CD34_Primary_Cells_Male	Core	E051-H3K4me3.tagAlign.gz	27644389	130	0.646544	45	0.623208	1500	0.322535	2.00457	1.07761	0.724	0.732	0.755	88	0.962
H3K4me3	E052	MUS.SAT	Muscle Satellite Cultured Cells	Muscle_Satellite_Cultured_Cells	Core	E052-H3K4me3.tagAlign.gz	30000000	170	0.454803	35	0.417117	1500	0.30045	1.51374	1.32303	0.438	0.428	0.491	88.4	0.962
H3K4me3	E053	BRN.CRTX.DR.NRSPHR	Cortex derived primary cultured neurospheres	Neurosphere_Cultured_Cells_Cortex_Derived	Core	E053-H3K4me3.tagAlign.gz	17668724	190	0.533821	45	0.484105	1500	0.225597	2.36626	1.19232	0.6	0.6	0.61	89.4	0.94
H3K4me3	E054	BRN.GANGEM.DR.NRSPHR	Ganglion Eminence derived primary cultured neurospheres	Neurosphere_Cultured_Cells_Ganglionic_Eminence_Derived	Core	E054-H3K4me3.tagAlign.gz	18829032	160	0.574852	45	0.53788	1500	0.262255	2.19195	1.13414	0.706	0.708	0.722	89.6	0.969
H3K4me3	E055	SKIN.PEN.FRSK.FIB.01	Foreskin Fibroblast Primary Cells skin01	Penis_Foreskin_Fibroblast_Primary_Cells_skin01	Core	E055-H3K4me3.tagAlign.gz	30000000	160	0.57114	45	0.545942	1500	0.339727	1.68117	1.12219	0.585	0.587	0.635	90.9	0.965
H3K4me3	E056	SKIN.PEN.FRSK.FIB.02	Foreskin Fibroblast Primary Cells skin02	Penis_Foreskin_Fibroblast_Primary_Cells_skin02	Core	E056-H3K4me3.tagAlign.gz	30000000	160	0.509235	45	0.484275	1500	0.321683	1.58304	1.15352	0.448	0.448	0.542	90.3	0.953
H3K4me3	E057	SKIN.PEN.FRSK.KER.02	Foreskin Keratinocyte Primary Cells skin02	Penis_Foreskin_Keratinocyte_Primary_Cells_skin02	Core	E057-H3K4me3.tagAlign.gz	24525728	170	0.627963	45	0.577503	1500	0.296991	2.11442	1.17988	0.679	0.68	0.701	91.3	0.944
H3K4me3	E058	SKIN.PEN.FRSK.KER.03	Foreskin Keratinocyte Primary Cells skin03	Penis_Foreskin_Keratinocyte_Primary_Cells_skin03	Core	E058-H3K4me3.tagAlign.gz	30000000	235	0.692769	45	0.634504	1500	0.35214	1.96731	1.20635	0.706	0.71	0.727	90.9	0.961
H3K4me3	E059	SKIN.PEN.FRSK.MEL.01	Foreskin Melanocyte Primary Cells skin01	Penis_Foreskin_Melanocyte_Primary_Cells_skin01	Core	E059-H3K4me3.tagAlign.gz	20064844	180	0.42687	45	0.39587	1500	0.245312	1.74011	1.2059	0.446	0.431	0.498	86.8	0.932
H3K4me3	E061	SKIN.PEN.FRSK.MEL.03	Foreskin Melanocyte Primary Cells skin03	Penis_Foreskin_Melanocyte_Primary_Cells_skin03	Core	E061-H3K4me3.tagAlign.gz	30000000	175	0.615382	45	0.568477	1500	0.294149	2.09208	1.17098	0.522	0.522	0.536	86.8	0.932
H3K4me3	E062	BLD.PER.MONUC.PC	Primary mononuclear cells from peripheral blood	Peripheral_Blood_Mononuclear_Primary_Cells	Core	E062-H3K4me3.tagAlign.gz	30000000	210	0.369446	45	0.355258	1500	0.283759	1.30197	1.19844	0.221	0.22	0.242	86.7	0.902
H3K4me3	E063	FAT.ADIP.NUC	Adipose Nuclei	Adipose_Nuclei	Core	E063-H3K4me3.tagAlign.gz	30000000	180	0.429941	35	0.408213	1500	0.290316	1.48094	1.1843	0.373	0.369	0.432	86.1	0.956
H3K4me3	E065	HRT.AOR	Aorta	Aorta	Core	E065-H3K4me3.tagAlign.gz	21785763	180	0.273082	35	0.269048	1500	0.236281	1.15575	1.12312	0.204	0.19	0.248	70.6	0.824
H3K4me3	E066	LIV.ADLT	Liver	Adult_Liver	Core	E066-H3K4me3.tagAlign.gz	30000000	170	0.348768	35	0.350924	1500	0.292544	1.19219	0.963063	0.238	0.227	0.317	73.2	0.894
H3K4me3	E067	BRN.ANG.GYR	Brain Angular Gyrus	Brain_Angular_Gyrus	Core	E067-H3K4me3.tagAlign.gz	30000000	195	0.334336	35	0.329185	1500	0.293043	1.14091	1.14251	0.202	0.19	0.256	87.3	0.952
H3K4me3	E068	BRN.ANT.CAUD	Brain Anterior Caudate	Brain_Anterior_Caudate	Core	E068-H3K4me3.tagAlign.gz	30000000	185	0.365849	35	0.354659	1500	0.294971	1.24029	1.18746	0.28	0.268	0.343	88.3	0.964
H3K4me3	E069	BRN.CING.GYR	Brain Cingulate Gyrus	Brain_Cingulate_Gyrus	Core	E069-H3K4me3.tagAlign.gz	30000000	180	0.345732	35	0.33783	1500	0.293054	1.17976	1.17649	0.231	0.218	0.288	88.8	0.964
H3K4me3	E070	BRN.GRM.MTRX	Brain Germinal Matrix	Brain_Germinal_Matrix	Core	E070-H3K4me3.tagAlign.gz	20093552	175	0.517048	45	0.478525	1500	0.258862	1.99739	1.17537	0.601	0.601	0.619	88.7	0.946
H3K4me3	E071	BRN.HIPP.MID	Brain Hippocampus Middle	Brain_Hippocampus_Middle	Core	E071-H3K4me3.tagAlign.gz	30000000	245	0.372406	35	0.358323	1500	0.297018	1.25382	1.22971	0.294	0.283	0.356	89.9	0.969
H3K4me3	E072	BRN.INF.TMP	Brain Inferior Temporal Lobe	Brain_Inferior_Temporal_Lobe	Core	E072-H3K4me3.tagAlign.gz	30000000	185	0.353827	35	0.345551	1500	0.293814	1.20426	1.15995	0.253	0.241	0.313	88.5	0.962
H3K4me3	E073	BRN.DL.PRFRNTL.CRTX	Brain_Dorsolateral_Prefrontal_Cortex	Brain_Mid_Frontal_Lobe	Core	E073-H3K4me3.tagAlign.gz	30000000	185	0.338669	35	0.334066	1500	0.29414	1.15139	1.11531	0.214	0.205	0.268	88.1	0.962
H3K4me3	E074	BRN.SUB.NIG	Brain Substantia Nigra	Brain_Substantia_Nigra	Core	E074-H3K4me3.tagAlign.gz	30000000	175	0.32034	35	0.320475	1500	0.291324	1.0996	0.995362	0.168	0.15	0.239	82.2	0.932
H3K4me3	E075	GI.CLN.MUC	Colonic Mucosa	Colonic_Mucosa	Core	E075-H3K4me3.tagAlign.gz	12171088	155	0.328822	35	0.300314	1500	0.169506	1.93989	1.21794	0.535	0.51	0.56	84.6	0.894
H3K4me3	E076	GI.CLN.SM.MUS	Colon Smooth Muscle	Colon_Smooth_Muscle	Core	E076-H3K4me3.tagAlign.gz	30000000	220	0.319536	35	0.321379	1500	0.294348	1.08557	0.931816	0.176	0.16	0.256	85	0.933
H3K4me3	E077	GI.DUO.MUC	Duodenum Mucosa	Duodenum_Mucosa	Core	E077-H3K4me3.tagAlign.gz	30000000	160	0.400536	35	0.389913	1500	0.302541	1.32391	1.12159	0.326	0.316	0.387	86.1	0.956
H3K4me3	E078	GI.DUO.SM.MUS	Duodenum Smooth Muscle	Duodenum_Smooth_Muscle	Core	E078-H3K4me3.tagAlign.gz	30000000	260	0.356143	35	0.351749	1500	0.298862	1.19167	1.08309	0.265	0.258	0.336	87.8	0.947
H3K4me3	E079	GI.ESO	Esophagus	Esophagus	Core	E079-H3K4me3.tagAlign.gz	16538590	150	0.398749	35	0.34745	1500	0.18694	2.13303	1.3196	0.429	0.39	0.457	78.5	0.925
H3K4me3	E080	ADRL.GLND.FET	Fetal Adrenal Gland	Fetal_Adrenal_Gland	Core	E080-H3K4me3.tagAlign.gz	30000000	185	0.5419	45	0.485541	1500	0.287183	1.88695	1.28413	0.415	0.417	0.429	87.4	0.959
H3K4me3	E081	BRN.FET.M	Fetal Brain Male	Fetal_Brain_Male	Core	E081-H3K4me3.tagAlign.gz	27040862	95	0.285873	35	0.290366	1500	0.271167	1.05424	0.766004	0.105	0.081	0.187	45.6	0.563
H3K4me3	E082	BRN.FET.F	Fetal Brain Female	Fetal_Brain_Female	Core	E082-H3K4me3.tagAlign.gz	30000000	190	0.52258	45	0.496225	1500	0.309304	1.68954	1.14099	0.511	0.514	0.531	88	0.946
H3K4me3	E083	HRT.FET	Fetal Heart	Fetal_Heart	Core	E083-H3K4me3.tagAlign.gz	13971404	220	0.172104	35	0.181574	1500	0.162711	1.05773	0.497988	0.162	0.124	0.308	50.5	0.595
H3K4me3	E084	GI.L.INT.FET	Fetal Intestine Large	Fetal_Intestine_Large	Core	E084-H3K4me3.tagAlign.gz	20631600	180	0.500115	45	0.434721	1500	0.25105	1.99209	1.35604	0.501	0.501	0.517	89.3	0.956
H3K4me3	E085	GI.S.INT.FET	Fetal Intestine Small	Fetal_Intestine_Small	Core	E085-H3K4me3.tagAlign.gz	26466933	175	0.509004	45	0.453456	1500	0.281085	1.81086	1.32226	0.432	0.432	0.45	89.9	0.966
H3K4me3	E086	KID.FET	Fetal Kidney	Fetal_Kidney	Core	E086-H3K4me3.tagAlign.gz	29229697	160	0.369947	35	0.350588	1500	0.284348	1.30104	1.29227	0.225	0.215	0.261	78.9	0.867
H3K4me3	E087	PANC.ISLT	Pancreatic Islets	Pancreatic_Islets	Core	E087-H3K4me3.tagAlign.gz	26815847	170	0.444827	45	0.426842	1500	0.284457	1.56377	1.12631	0.408	0.404	0.433	79.1	0.865
H3K4me3	E088	LNG.FET	Fetal Lung	Fetal_Lung	Core	E088-H3K4me3.tagAlign.gz	27343567	135	0.321218	35	0.317474	1500	0.273379	1.17499	1.08489	0.191	0.173	0.255	72.1	0.816
H3K4me3	E089	MUS.TRNK.FET	Fetal Muscle Trunk	Fetal_Muscle_Trunk	Core	E089-H3K4me3.tagAlign.gz	30000000	195	0.524307	45	0.469319	1500	0.281631	1.86168	1.29297	0.401	0.399	0.419	88.6	0.948
H3K4me3	E090	MUS.LEG.FET	Fetal Muscle Leg	Fetal_Muscle_Leg	Core	E090-H3K4me3.tagAlign.gz	29834349	170	0.530668	45	0.475509	1500	0.28345	1.87218	1.2872	0.403	0.406	0.42	89.9	0.964
H3K4me3	E091	PLCNT.FET	Placenta	Fetal_Placenta	Core	E091-H3K4me3.tagAlign.gz	19826366	200	0.3341	35	0.299968	1500	0.213589	1.56422	1.39515	0.275	0.269	0.29	79.7	0.893
H3K4me3	E092	GI.STMC.FET	Fetal Stomach	Fetal_Stomach	Core	E092-H3K4me3.tagAlign.gz	27873393	170	0.498094	45	0.447481	1500	0.272923	1.82503	1.28995	0.386	0.389	0.402	89	0.96
H3K4me3	E093	THYM.FET	Fetal Thymus	Fetal_Thymus	Core	E093-H3K4me3.tagAlign.gz	25524279	180	0.486734	45	0.433746	1500	0.264539	1.83994	1.31316	0.369	0.37	0.386	83	0.907
H3K4me3	E094	GI.STMC.GAST	Gastric	Gastric	Core	E094-H3K4me3.tagAlign.gz	19845042	150	0.284989	35	0.272453	1500	0.21526	1.32393	1.21918	0.228	0.183	0.365	63.5	0.874
H3K4me3	E095	HRT.VENT.L	Left Ventricle	Left_Ventricle	Core	E095-H3K4me3.tagAlign.gz	29961373	155	0.563445	35	0.488912	1500	0.255417	2.20598	1.31921	0.441	0.435	0.452	86.1	0.937
H3K4me3	E096	LNG	Lung	Lung	Core	E096-H3K4me3.tagAlign.gz	22279970	130	0.299417	45	0.285982	1500	0.234412	1.27731	1.26053	0.211	0.175	0.334	64.3	0.889
H3K4me3	E097	OVRY	Ovary	Ovary	Core	E097-H3K4me3.tagAlign.gz	26021916	180	0.487828	35	0.45452	1500	0.274075	1.77991	1.18459	0.439	0.438	0.463	81.7	0.816
H3K4me3	E098	PANC	Pancreas	Pancreas	Core	E098-H3K4me3.tagAlign.gz	20719609	150	0.462814	45	0.409847	1500	0.214464	2.158	1.2711	0.426	0.397	0.457	78.5	0.941
H3K4me3	E099	PLCNT.AMN	Placenta Amnion	Placenta_Amnion	Core	E099-H3K4me3.tagAlign.gz	21483416	215	0.244655	35	0.242478	1500	0.229141	1.06771	1.16325	0.108	0.097	0.129	70.6	0.849
H3K4me3	E100	MUS.PSOAS	Psoas Muscle	Psoas_Muscle	Core	E100-H3K4me3.tagAlign.gz	30000000	180	0.490722	35	0.455085	1500	0.283637	1.73011	1.20785	0.401	0.402	0.427	86.2	0.915
H3K4me3	E101	GI.RECT.MUC.29	Rectal Mucosa Donor 29	Rectal_Mucosa.Donor_29	Core	E101-H3K4me3.tagAlign.gz	27217596	160	0.415734	35	0.396008	1500	0.288075	1.44314	1.18276	0.378	0.366	0.427	84.9	0.912
H3K4me3	E102	GI.RECT.MUC.31	Rectal Mucosa Donor 31	Rectal_Mucosa.Donor_31	Core	E102-H3K4me3.tagAlign.gz	21058139	160	0.322474	35	0.30851	1500	0.232	1.38997	1.18251	0.346	0.331	0.393	85.8	0.937
H3K4me3	E103	GI.RECT.SM.MUS	Rectal Smooth Muscle	Rectal_Smooth_Muscle	Core	E103-H3K4me3.tagAlign.gz	25364063	155	0.359103	35	0.342665	1500	0.269694	1.33152	1.22526	0.323	0.306	0.384	86.9	0.953
H3K4me3	E104	HRT.ATR.R	Right Atrium	Right_Atrium	Core	E104-H3K4me3.tagAlign.gz	24225024	190	0.43775	35	0.41229	1500	0.272091	1.60884	1.1816	0.441	0.439	0.471	86.6	0.932
H3K4me3	E105	HRT.VNT.R	Right Ventricle	Right_Ventricle	Core	E105-H3K4me3.tagAlign.gz	9425366	190	0.304425	35	0.272814	1500	0.146043	2.08449	1.24936	0.427	0.427	0.449	87.8	0.926
H3K4me3	E106	GI.CLN.SIG	Sigmoid Colon	Sigmoid_Colon	Core	E106-H3K4me3.tagAlign.gz	15535345	160	0.194579	40	0.190958	1500	0.163522	1.18993	1.13202	0.223	0.166	0.289	60.4	0.779
H3K4me3	E107	MUS.SKLT.M	Skeletal Muscle Male	Skeletal_Muscle_Male	Core	E107-H3K4me3.tagAlign.gz	27898894	160	0.365035	35	0.354034	1500	0.285324	1.27937	1.16011	0.294	0.278	0.354	84.2	0.937
H3K4me3	E108	MUS.SKLT.F	Skeletal Muscle Female	Skeletal_Muscle_Female	Core	E108-H3K4me3.tagAlign.gz	27458610	175	0.373128	35	0.359873	1500	0.283241	1.31735	1.17297	0.316	0.303	0.371	83.3	0.934
H3K4me3	E109	GI.S.INT	Small Intestine	Small_Intestine	Core	E109-H3K4me3.tagAlign.gz	10595509	155	0.155879	35	0.158573	1500	0.132116	1.17986	0.898183	0.229	0.166	0.308	59.1	0.748
H3K4me3	E110	GI.STMC.MUC	Stomach Mucosa	Stomach_Mucosa	Core	E110-H3K4me3.tagAlign.gz	23950798	260	0.257461	35	0.261806	1500	0.249459	1.03208	0.648097	0.099	0.069	0.177	68.8	0.825
H3K4me3	E111	GI.STMC.MUS	Stomach Smooth Muscle	Stomach_Smooth_Muscle	Core	E111-H3K4me3.tagAlign.gz	21806748	175	0.421146	35	0.395042	1500	0.26127	1.61192	1.19514	0.491	0.481	0.536	88.7	0.968
H3K4me3	E112	THYM	Thymus	Thymus	Core	E112-H3K4me3.tagAlign.gz	26648758	190	0.550641	35	0.505843	1500	0.283447	1.94266	1.20143	0.477	0.48	0.498	85.6	0.9
H3K4me3	E113	SPLN	Spleen	Spleen	Core	E113-H3K4me3.tagAlign.gz	16923903	145	0.219782	35	0.216787	1500	0.192757	1.1402	1.12464	0.159	0.097	0.379	46.1	0.779
H3K4me3	E114	LNG.A549.ETOH002.CNCR	A549 EtOH 0.02pct Lung Carcinoma Cell Line	A549_EtOH_0.02pct_Lung_Carcinoma	Core	E114-H3K4me3.tagAlign.gz	30000000	225	0.390321	35	0.379859	1500	0.320867	1.21646	1.17734	0.362	0.354	0.429	80.3	0.904
H3K4me3	E115	BLD.DND41.CNCR	Dnd41 TCell Leukemia Cell Line	Dnd41_TCell_Leukemia	Core	E115-H3K4me3.tagAlign.gz	30000000	155	0.591579	35	0.56318	1500	0.345833	1.71059	1.13066	0.541	0.541	0.563	78	0.902
H3K4me3	E116	BLD.GM12878	GM12878 Lymphoblastoid Cell Line	GM12878_Lymphoblastoid	Core	E116-H3K4me3.tagAlign.gz	30000000	175	0.351764	35	0.349026	1500	0.313668	1.12145	1.07744	0.322	0.304	0.392	66.8	0.722
H3K4me3	E117	CRVX.HELAS3.CNCR	HeLa-S3 Cervical Carcinoma Cell Line	HeLa-S3_Cervical_Carcinoma	Core	E117-H3K4me3.tagAlign.gz	30000000	210	0.441378	35	0.420232	1500	0.321719	1.37193	1.21465	0.372	0.362	0.417	78	0.902
H3K4me3	E118	LIV.HEPG2.CNCR	HepG2 Hepatocellular Carcinoma Cell Line	HepG2_Hepatocellular_Carcinoma	Core	E118-H3K4me3.tagAlign.gz	16348994	180	0.446394	40	0.410469	1500	0.252995	1.76444	1.22813	0.664	0.667	0.693	75.4	0.87
H3K4me3	E119	BRST.HMEC	HMEC Mammary Epithelial Primary Cells	HMEC_Mammary_Epithelial	Core	E119-H3K4me3.tagAlign.gz	26608778	145	0.490735	40	0.464514	1500	0.293496	1.67203	1.15332	0.443	0.442	0.465	86.8	0.932
H3K4me3	E120	MUS.HSMM	HSMM Skeletal Muscle Myoblasts Cell Line	HSMM_Skeletal_Muscle_Myoblasts	Core	E120-H3K4me3.tagAlign.gz	19561255	170	0.535208	40	0.475416	1500	0.242041	2.21123	1.2562	0.608	0.604	0.637	85.1	0.911
H3K4me3	E121	MUS.HSMMT	HSMM cell derived Skeletal Muscle Myotubes Cell Line	HSMMtube_Skeletal_Muscle_Myotubes_Derived_from_HSMM	Core	E121-H3K4me3.tagAlign.gz	20030186	190	0.339394	35	0.322428	1500	0.237507	1.42899	1.19978	0.384	0.352	0.456	83.8	0.937
H3K4me3	E122	VAS.HUVEC	HUVEC Umbilical Vein Endothelial Cells Cell Line	HUVEC_Umbilical_Vein_Endothelial_Cells	Core	E122-H3K4me3.tagAlign.gz	22614527	195	0.47553	35	0.445664	1500	0.282891	1.68096	1.18348	0.492	0.488	0.518	82.5	0.834
H3K4me3	E123	BLD.K562.CNCR	K562 Leukemia Cell Line	K562_Leukemia	Core	E123-H3K4me3.tagAlign.gz	20561626	170	0.340315	35	0.33012	1500	0.261541	1.30119	1.14866	0.41	0.399	0.46	70.8	0.842
H3K4me3	E124	BLD.CD14.MONO	Monocytes-CD14+ RO01746 Cell Line	Monocytes-CD14+_RO01746	Core	E124-H3K4me3.tagAlign.gz	24976125	240	0.541349	35	0.499943	1500	0.314544	1.72106	1.22333	0.649	0.663	0.697	84.6	0.937
H3K4me3	E125	BRN.NHA	NH-A Astrocytes Cell Line	NH-A_Astrocytes	Core	E125-H3K4me3.tagAlign.gz	24466467	180	0.383863	35	0.367056	1500	0.273273	1.40469	1.17921	0.365	0.345	0.417	86.4	0.935
H3K4me3	E126	SKIN.NHDFAD	NHDF-Ad Adult Dermal Fibroblast Primary Cells	NHDF-Ad_Adult_Dermal_Fibroblasts	Core	E126-H3K4me3.tagAlign.gz	30000000	145	0.381822	35	0.368033	1500	0.302756	1.26116	1.21124	0.283	0.268	0.338	79.5	0.841
H3K4me3	E127	SKIN.NHEK	NHEK-Epidermal Keratinocyte Primary Cells	NHEK-Epidermal_Keratinocytes	Core	E127-H3K4me3.tagAlign.gz	19053894	165	0.35424	35	0.34078	1500	0.241362	1.46767	1.13539	0.446	0.433	0.486	84.3	0.881
H3K4me3	E128	LNG.NHLF	NHLF Lung Fibroblast Primary Cells	NHLF_Lung_Fibroblasts	Core	E128-H3K4me3.tagAlign.gz	27390646	165	0.395818	35	0.379691	1500	0.290382	1.36309	1.18057	0.33	0.317	0.371	86.5	0.943
H3K4me3	E129	BONE.OSTEO	Osteoblast Primary Cells	Osteoblasts	Core	E129-H3K4me3.tagAlign.gz	30000000	195	0.464392	40	0.438667	1500	0.316306	1.46818	1.21024	0.428	0.413	0.477	88.2	0.96
H3K56ac	E003	ESC.H1	H1 Cell Line	H1_Cell_Line	Class1	E003-H3K56ac.tagAlign.gz	33857093	110	0.322758	30	0.326871	1500	0.310351	1.03998	0.751023	0.06	0.02	0.14	22.7	0.394
H3K56ac	E008	ESC.H9	H9 Cell Line	H9_Cell_Line	Class1	E008-H3K56ac.tagAlign.gz	34972504	90	0.337447	30	0.33514	1500	0.315912	1.06817	1.11998	0.06	0.01	0.22	13.8	0.409
H3K56ac	E017	LNG.IMR90	IMR90 fetal lung fibroblasts Cell Line	IMR90_Cell_Line	Class1	E017-H3K56ac.tagAlign.gz	20189407	130	0.264631	35	0.254054	1500	0.2216	1.19418	1.32591	0.29	0.26	0.38	53.2	0.567
H3K79me1	E003	ESC.H1	H1 Cell Line	H1_Cell_Line	Class1	E003-H3K79me1.tagAlign.gz	39025461	90	0.360225	35	0.365002	1500	0.347997	1.03514	0.719059	0.08	0.01	0.26	35.2	0.58
H3K79me1	E004	ESDR.H1.BMP4.MESO	H1 BMP4 Derived Mesendoderm Cultured Cells	H1_BMP4_Derived_Mesendoderm_Cultured_Cells	Class1	E004-H3K79me1.tagAlign.gz	45000000	125	0.386424	35	0.387429	1500	0.373748	1.03391	0.92652	0.17	0.09	0.34	35.2	0.623
H3K79me1	E005	ESDR.H1.BMP4.TROP	H1 BMP4 Derived Trophoblast Cultured Cells	H1_BMP4_Derived_Trophoblast_Cultured_Cells	Class1	E005-H3K79me1.tagAlign.gz	38306820	125	0.393333	35	0.383152	1500	0.353722	1.11199	1.34595	0.26	0.24	0.49	26.6	0.51
H3K79me1	E006	ESDR.H1.MSC	H1 Derived Mesenchymal Stem Cells	H1_Derived_Mesenchymal_Stem_Cells	Class1	E006-H3K79me1.tagAlign.gz	45000000	120	0.327117	35	0.317884	1500	0.302719	1.0806	1.60887	0.32	0.25	0.53	19.1	0.535
H3K79me1	E007	ESDR.H1.NEUR.PROG	H1 Derived Neuronal Progenitor Cultured Cells	H1_Derived_Neuronal_Progenitor_Cultured_Cells	Class1	E007-H3K79me1.tagAlign.gz	37065349	125	0.12152	35	0.124437	1500	0.112656	1.07868	0.752381	0.31	0.07	0.39	27.6	0.529
H3K79me1	E008	ESC.H9	H9 Cell Line	H9_Cell_Line	Class1	E008-H3K79me1.tagAlign.gz	33174400	270	0.306463	35	0.314368	1500	0.300549	1.01968	0.427931	0.07	0.01	0.27	30.6	0.565
H3K79me1	E017	LNG.IMR90	IMR90 fetal lung fibroblasts Cell Line	IMR90_Cell_Line	Class1	E017-H3K79me1.tagAlign.gz	45000000	105	0.425482	35	0.419724	1500	0.398821	1.06685	1.27542	0.37	0.47	0.64	33	0.671
H3K79me2	E003	ESC.H1	H1 Cell Line	H1_Cell_Line	Class1	E003-H3K79me2.tagAlign.gz	44825222	90	0.394001	35	0.397185	1500	0.378541	1.04084	0.829239	0.07	0.03	0.2	37.4	0.536
H3K79me2	E004	ESDR.H1.BMP4.MESO	H1 BMP4 Derived Mesendoderm Cultured Cells	H1_BMP4_Derived_Mesendoderm_Cultured_Cells	Class1	E004-H3K79me2.tagAlign.gz	45000000	125	0.399422	35	0.389991	1500	0.359247	1.11183	1.30676	0.34	0.33	0.43	63.2	0.796
H3K79me2	E005	ESDR.H1.BMP4.TROP	H1 BMP4 Derived Trophoblast Cultured Cells	H1_BMP4_Derived_Trophoblast_Cultured_Cells	Class1	E005-H3K79me2.tagAlign.gz	37618376	135	0.377542	35	0.369112	1500	0.345577	1.0925	1.35821	0.18	0.13	0.42	33.4	0.467
H3K79me2	E008	ESC.H9	H9 Cell Line	H9_Cell_Line	Class1	E008-H3K79me2.tagAlign.gz	45000000	120	0.392115	35	0.39623	1500	0.379034	1.03451	0.760699	0.14	0.07	0.26	48.9	0.64
H3K79me2	E017	LNG.IMR90	IMR90 fetal lung fibroblasts Cell Line	IMR90_Cell_Line	Class1	E017-H3K79me2.tagAlign.gz	43284915	105	0.471101	40	0.44739	1500	0.394052	1.19553	1.44454	0.41	0.46	0.6	56.9	0.75
H3K79me2	E114	LNG.A549.ETOH002.CNCR	A549 EtOH 0.02pct Lung Carcinoma Cell Line	A549_EtOH_0.02pct_Lung_Carcinoma	Class1	E114-H3K79me2.tagAlign.gz	45000000	180	0.471984	35	0.47974	1500	0.446846	1.05626	0.764202	0.44	0.55	0.65	67.4	0.859
H3K79me2	E115	BLD.DND41.CNCR	Dnd41 TCell Leukemia Cell Line	Dnd41_TCell_Leukemia	Class1	E115-H3K79me2.tagAlign.gz	45000000	110	0.530428	35	0.538024	1500	0.474341	1.11824	0.880727	0.56	0.66	0.72	66.4	0.827
H3K79me2	E116	BLD.GM12878	GM12878 Lymphoblastoid Cell Line	GM12878_Lymphoblastoid	Class1	E116-H3K79me2.tagAlign.gz	24842039	110	0.389407	35	0.393336	1500	0.345729	1.12634	0.917472	0.54	0.65	0.72	62.4	0.79
H3K79me2	E117	CRVX.HELAS3.CNCR	HeLa-S3 Cervical Carcinoma Cell Line	HeLa-S3_Cervical_Carcinoma	Class1	E117-H3K79me2.tagAlign.gz	24940719	150	0.324858	35	0.327715	1500	0.292717	1.1098	0.918365	0.33	0.38	0.48	66.5	0.809
H3K79me2	E118	LIV.HEPG2.CNCR	HepG2 Hepatocellular Carcinoma Cell Line	HepG2_Hepatocellular_Carcinoma	Class1	E118-H3K79me2.tagAlign.gz	45000000	110	0.463889	30	0.467952	1500	0.42906	1.08117	0.89553	0.4	0.42	0.51	63.2	0.787
H3K79me2	E119	BRST.HMEC	HMEC Mammary Epithelial Primary Cells	HMEC_Mammary_Epithelial	Class1	E119-H3K79me2.tagAlign.gz	44800822	145	0.518322	35	0.515241	1500	0.459117	1.12895	1.0549	0.54	0.68	0.76	72.5	0.895
H3K79me2	E120	MUS.HSMM	HSMM Skeletal Muscle Myoblasts Cell Line	HSMM_Skeletal_Muscle_Myoblasts	Class1	E120-H3K79me2.tagAlign.gz	44337730	125	0.472601	35	0.477775	1500	0.434795	1.08695	0.879609	0.38	0.49	0.6	72.8	0.886
H3K79me2	E121	MUS.HSMMT	HSMM cell derived Skeletal Muscle Myotubes Cell Line	HSMMtube_Skeletal_Muscle_Myotubes_Derived_from_HSMM	Class1	E121-H3K79me2.tagAlign.gz	42037301	110	0.431618	35	0.434719	1500	0.403138	1.07065	0.901818	0.32	0.43	0.57	59.9	0.802
H3K79me2	E122	VAS.HUVEC	HUVEC Umbilical Vein Endothelial Cells Cell Line	HUVEC_Umbilical_Vein_Endothelial_Cells	Class1	E122-H3K79me2.tagAlign.gz	45000000	125	0.535183	35	0.535907	1500	0.471747	1.13447	0.988722	0.6	0.7	0.76	70.2	0.86
H3K79me2	E123	BLD.K562.CNCR	K562 Leukemia Cell Line	K562_Leukemia	Class1	E123-H3K79me2.tagAlign.gz	32308428	135	0.48586	35	0.493188	1500	0.409786	1.18564	0.912134	0.5	0.58	0.66	64.3	0.763
H3K79me2	E124	BLD.CD14.MONO	Monocytes-CD14+ RO01746 Cell Line	Monocytes-CD14+_RO01746	Class1	E124-H3K79me2.tagAlign.gz	25299592	100	0.361892	35	0.375939	1500	0.337558	1.07209	0.634014	0.47	0.61	0.69	54.7	0.746
H3K79me2	E125	BRN.NHA	NH-A Astrocytes Cell Line	NH-A_Astrocytes	Class1	E125-H3K79me2.tagAlign.gz	43948835	130	0.449431	35	0.45731	1500	0.425202	1.05698	0.754588	0.32	0.45	0.59	73.3	0.904
H3K79me2	E126	SKIN.NHDFAD	NHDF-Ad Adult Dermal Fibroblast Primary Cells	NHDF-Ad_Adult_Dermal_Fibroblasts	Class1	E126-H3K79me2.tagAlign.gz	33522739	130	0.394212	35	0.400572	1500	0.371156	1.06212	0.7838	0.34	0.45	0.57	68.1	0.857
H3K79me2	E127	SKIN.NHEK	NHEK-Epidermal Keratinocyte Primary Cells	NHEK-Epidermal_Keratinocytes	Class1	E127-H3K79me2.tagAlign.gz	45000000	125	0.51884	35	0.519919	1500	0.459628	1.12883	0.982103	0.6	0.69	0.75	70	0.877
H3K79me2	E128	LNG.NHLF	NHLF Lung Fibroblast Primary Cells	NHLF_Lung_Fibroblasts	Class1	E128-H3K79me2.tagAlign.gz	45000000	125	0.523759	35	0.525547	1500	0.467392	1.1206	0.969247	0.58	0.68	0.75	75.9	0.907
H3K79me2	E129	BONE.OSTEO	Osteoblast Primary Cells	Osteoblasts	Class 1	E129-H3K79me2.tagAlign.gz	45000000	145	0.447171	35	0.448778	1500	0.413397	1.0817	0.95457	0.49	0.59	0.67	68.5	0.879
H3K9ac	E001	ESC.I3	ES-I3 Cell Line	ES-I3_Cell_Line	Core	E001-H3K9ac.tagAlign.gz	23124747	190	0.370022	35	0.337322	1500	0.256986	1.43986	1.40704	0.417	0.41	0.457	80.3	0.883
H3K9ac	E002	ESC.WA7	ES-WA7 Cell Line	ES-WA7_Cell_Line	Core	E002-H3K9ac.tagAlign.gz	29503477	190	0.343811	35	0.328823	1500	0.295513	1.16344	1.44997	0.194	0.166	0.308	35.3	0.647
H3K9ac	E003	ESC.H1	H1 Cell Line	H1_Cell_Line	Core	E003-H3K9ac.tagAlign.gz	30000000	135	0.334432	35	0.32457	1500	0.286345	1.16794	1.25801	0.152	0.13	0.23	64.1	0.845
H3K9ac	E004	ESDR.H1.BMP4.MESO	H1 BMP4 Derived Mesendoderm Cultured Cells	H1_BMP4_Derived_Mesendoderm_Cultured_Cells	Core	E004-H3K9ac.tagAlign.gz	30000000	140	0.341504	35	0.32618	1500	0.284872	1.1988	1.37096	0.224	0.201	0.297	73.8	0.88
H3K9ac	E005	ESDR.H1.BMP4.TROP	H1 BMP4 Derived Trophoblast Cultured Cells	H1_BMP4_Derived_Trophoblast_Cultured_Cells	Core	E005-H3K9ac.tagAlign.gz	30000000	120	0.293546	35	0.29699	1500	0.280629	1.04603	0.789494	0.072	0.034	0.235	22.1	0.436
H3K9ac	E006	ESDR.H1.MSC	H1 Derived Mesenchymal Stem Cells	H1_Derived_Mesenchymal_Stem_Cells	Core	E006-H3K9ac.tagAlign.gz	30000000	105	0.170576	35	0.160148	1500	0.146832	1.16171	1.78311	0.18	0.083	0.307	38.7	0.691
H3K9ac	E007	ESDR.H1.NEUR.PROG	H1 Derived Neuronal Progenitor Cultured Cells	H1_Derived_Neuronal_Progenitor_Cultured_Cells	Core	E007-H3K9ac.tagAlign.gz	30000000	115	0.083439	35	0.0812103	1500	0.0675042	1.23606	1.1626	0.501	0.196	0.498	35.5	0.607
H3K9ac	E008	ESC.H9	H9 Cell Line	H9_Cell_Line	Core	E008-H3K9ac.tagAlign.gz	30000000	115	0.323473	35	0.317837	1500	0.288876	1.11976	1.19462	0.128	0.101	0.218	54	0.809
H3K9ac	E011	ESDR.CD184.ENDO	hESC Derived CD184+ Endoderm Cultured Cells	hESC_Derived_CD184+_Endoderm_Cultured_Cells	Core	E011-H3K9ac.tagAlign.gz	30000000	220	0.327807	35	0.319669	1500	0.293346	1.11748	1.30918	0.139	0.122	0.203	69.2	0.777
H3K9ac	E014	ESC.HUES48	HUES48 Cell Line	HUES48_Cell_Line	Core	E014-H3K9ac.tagAlign.gz	30000000	180	0.32089	35	0.308503	1500	0.28765	1.11556	1.59402	0.112	0.091	0.179	60.5	0.806
H3K9ac	E015	ESC.HUES6	HUES6 Cell Line	HUES6_Cell_Line	Core	E015-H3K9ac.tagAlign.gz	23540772	165	0.401045	35	0.354094	1500	0.256791	1.56176	1.48253	0.379	0.359	0.455	71.3	0.845
H3K9ac	E016	ESC.HUES64	HUES64 Cell Line	HUES64_Cell_Line	Core	E016-H3K9ac.tagAlign.gz	30000000	190	0.353049	35	0.330789	1500	0.290682	1.21455	1.55501	0.19	0.167	0.273	73.9	0.882
H3K9ac	E017	LNG.IMR90	IMR90 fetal lung fibroblasts Cell Line	IMR90_Cell_Line	Core	E017-H3K9ac.tagAlign.gz	23399369	130	0.476465	45	0.404598	1500	0.263169	1.81049	1.50815	0.567	0.569	0.64	78.1	0.879
H3K9ac	E018	IPSC.15b	iPS-15b Cell Line	iPS-15b_Cell_Line	Core	E018-H3K9ac.tagAlign.gz	19039321	170	0.229793	35	0.220298	1500	0.20912	1.09886	1.84938	0.124	0.077	0.245	53.5	0.786
H3K9ac	E019	IPSC.18	iPS-18 Cell Line	iPS-18_Cell_Line	Core	E019-H3K9ac.tagAlign.gz	27443132	220	0.323769	35	0.30671	1500	0.274776	1.1783	1.53418	0.178	0.156	0.242	77.2	0.888
H3K9ac	E020	IPSC.20B	iPS-20b Cell Line	iPS-20b_Cell_Line	Core	E020-H3K9ac.tagAlign.gz	30000000	210	0.337075	35	0.324257	1500	0.298135	1.13061	1.4907	0.194	0.166	0.29	76.8	0.92
H3K9ac	E023	FAT.MSC.DR.ADIP	Mesenchymal Stem Cell Derived Adipocyte Cultured Cells	Mesenchymal_Stem_Cell_Derived_Adipocyte_Cultured_Cells	Core	E023-H3K9ac.tagAlign.gz	30000000	220	0.403847	35	0.37545	1500	0.312701	1.29148	1.45255	0.387	0.379	0.484	78.4	0.912
H3K9ac	E025	FAT.ADIP.DR.MSC	Adipose Derived Mesenchymal Stem Cell Cultured Cells	Adipose_Derived_Mesenchymal_Stem_Cell_Cultured_Cells	Core	E025-H3K9ac.tagAlign.gz	30000000	210	0.405034	35	0.379191	1500	0.313666	1.29129	1.3944	0.405	0.403	0.503	78.5	0.9
H3K9ac	E026	STRM.MRW.MSC	Bone Marrow Derived Cultured Mesenchymal Stem Cells	Bone_Marrow_Derived_Mesenchymal_Stem_Cell_Cultured_Cells	Core	E026-H3K9ac.tagAlign.gz	30000000	200	0.379553	35	0.3541	1500	0.29954	1.26712	1.46649	0.288	0.276	0.354	83.3	0.898
H3K9ac	E027	BRST.MYO	Breast Myoepithelial Primary Cells	Breast_Myoepithelial_Cells	Core	E027-H3K9ac.tagAlign.gz	23387974	115	0.255471	35	0.255302	1500	0.241933	1.05596	1.01266	0.115	0.073	0.282	49.3	0.598
H3K9ac	E038	BLD.CD4.NPC	Primary T helper naive cells from peripheral blood	CD4_Naive_Primary_Cells	Core	E038-H3K9ac.tagAlign.gz	4657202	270	0.0870705	40	0.0771275	1500	0.0668951	1.3016	1.97172	0.255	0.171	0.423	55.4	0.78
H3K9ac	E047	BLD.CD8.NPC	Primary T killer naive cells from peripheral blood	CD8_Naive_Primary_Cells	Core	E047-H3K9ac.tagAlign.gz	14693961	130	0.190638	35	0.178568	1500	0.169513	1.12462	2.33295	0.135	0.083	0.238	38.5	0.629
H3K9ac	E049	STRM.CHON.MRW.DR.MSC	Mesenchymal Stem Cell Derived Chondrocyte Cultured Cells	Chondrocytes_from_Bone_Marrow_Derived_Mesenchymal_Stem_Cell_Cultured_Cells	Core	E049-H3K9ac.tagAlign.gz	30000000	200	0.378987	35	0.353611	1500	0.299317	1.26617	1.46737	0.278	0.254	0.378	79.3	0.873
H3K9ac	E052	MUS.SAT	Muscle Satellite Cultured Cells	Muscle_Satellite_Cultured_Cells	Core	E052-H3K9ac.tagAlign.gz	30000000	200	0.498485	35	0.424287	1500	0.307078	1.62332	1.63304	0.527	0.53	0.584	82	0.935
H3K9ac	E062	BLD.PER.MONUC.PC	Primary mononuclear cells from peripheral blood	Peripheral_Blood_Mononuclear_Primary_Cells	Core	E062-H3K9ac.tagAlign.gz	30000000	165	0.322961	40	0.317586	1500	0.297988	1.0838	1.27421	0.16	0.131	0.338	68.3	0.855
H3K9ac	E063	FAT.ADIP.NUC	Adipose Nuclei	Adipose_Nuclei	Core	E063-H3K9ac.tagAlign.gz	30000000	210	0.311278	35	0.309349	1500	0.293461	1.06071	1.12135	0.13	0.106	0.241	74.6	0.901
H3K9ac	E066	LIV.ADLT	Liver	Adult_Liver	Core	E066-H3K9ac.tagAlign.gz	30000000	190	0.319958	35	0.313867	1500	0.293872	1.08876	1.30458	0.168	0.142	0.261	69.5	0.785
H3K9ac	E067	BRN.ANG.GYR	Brain Angular Gyrus	Brain_Angular_Gyrus	Core	E067-H3K9ac.tagAlign.gz	30000000	170	0.318169	35	0.311749	1500	0.296839	1.07185	1.43056	0.151	0.12	0.286	72.5	0.889
H3K9ac	E068	BRN.ANT.CAUD	Brain Anterior Caudate	Brain_Anterior_Caudate	Core	E068-H3K9ac.tagAlign.gz	28970422	160	0.317048	35	0.304877	1500	0.289339	1.09577	1.78332	0.166	0.132	0.3	72.9	0.888
H3K9ac	E069	BRN.CING.GYR	Brain Cingulate Gyrus	Brain_Cingulate_Gyrus	Core	E069-H3K9ac.tagAlign.gz	30000000	160	0.328094	35	0.319152	1500	0.299484	1.09553	1.45462	0.189	0.161	0.329	76.1	0.914
H3K9ac	E072	BRN.INF.TMP	Brain Inferior Temporal Lobe	Brain_Inferior_Temporal_Lobe	Core	E072-H3K9ac.tagAlign.gz	27859375	160	0.314049	35	0.303635	1500	0.283232	1.10881	1.51044	0.191	0.165	0.318	75.3	0.906
H3K9ac	E073	BRN.DL.PRFRNTL.CRTX	Brain_Dorsolateral_Prefrontal_Cortex	Brain_Mid_Frontal_Lobe	Core	E073-H3K9ac.tagAlign.gz	30000000	170	0.317421	35	0.312853	1500	0.29717	1.06815	1.29129	0.148	0.12	0.28	74	0.901
H3K9ac	E074	BRN.SUB.NIG	Brain Substantia Nigra	Brain_Substantia_Nigra	Core	E074-H3K9ac.tagAlign.gz	30000000	155	0.323277	35	0.314945	1500	0.297526	1.08655	1.47836	0.173	0.144	0.303	73	0.886
H3K9ac	E075	GI.CLN.MUC	Colonic Mucosa	Colonic_Mucosa	Core	E075-H3K9ac.tagAlign.gz	11223367	165	0.172758	35	0.168839	1500	0.143038	1.20777	1.15189	0.281	0.224	0.343	70.7	0.874
H3K9ac	E076	GI.CLN.SM.MUS	Colon Smooth Muscle	Colon_Smooth_Muscle	Core	E076-H3K9ac.tagAlign.gz	29463125	260	0.296464	35	0.298509	1500	0.288965	1.02595	0.785768	0.079	0.047	0.157	65.4	0.787
H3K9ac	E077	GI.DUO.MUC	Duodenum Mucosa	Duodenum_Mucosa	Core	E077-H3K9ac.tagAlign.gz	30000000	170	0.314211	35	0.311851	1500	0.296325	1.06036	1.152	0.132	0.112	0.208	74.3	0.891
H3K9ac	E083	HRT.FET	Fetal Heart	Fetal_Heart	Core	E083-H3K9ac.tagAlign.gz	15704109	255	0.258115	35	0.23708	1500	0.204384	1.2629	1.64336	0.399	0.382	0.487	72.3	0.781
H3K9ac	E086	KID.FET	Fetal Kidney	Fetal_Kidney	Core	E086-H3K9ac.tagAlign.gz	29435642	170	0.328965	35	0.319891	1500	0.287713	1.14338	1.28198	0.155	0.141	0.209	72.9	0.848
H3K9ac	E087	PANC.ISLT	Pancreatic Islets	Pancreatic_Islets	Core	E087-H3K9ac.tagAlign.gz	10327638	135	0.164833	35	0.155853	1500	0.136392	1.20852	1.46141	0.34	0.285	0.428	60.3	0.794
H3K9ac	E088	LNG.FET	Fetal Lung	Fetal_Lung	Core	E088-H3K9ac.tagAlign.gz	30000000	170	0.317694	35	0.312526	1500	0.293935	1.08083	1.27799	0.147	0.114	0.25	70.5	0.857
H3K9ac	E101	GI.RECT.MUC.29	Rectal Mucosa Donor 29	Rectal_Mucosa.Donor_29	Core	E101-H3K9ac.tagAlign.gz	25567948	155	0.282553	35	0.278607	1500	0.262491	1.07643	1.24487	0.133	0.109	0.2	73.1	0.888
H3K9ac	E102	GI.RECT.MUC.31	Rectal Mucosa Donor 31	Rectal_Mucosa.Donor_31	Core	E102-H3K9ac.tagAlign.gz	19135054	195	0.285609	35	0.266244	1500	0.225774	1.26502	1.47848	0.31	0.286	0.378	83.2	0.93
H3K9ac	E103	GI.RECT.SM.MUS	Rectal Smooth Muscle	Rectal_Smooth_Muscle	Core	E103-H3K9ac.tagAlign.gz	22689804	135	0.249208	35	0.249449	1500	0.237926	1.04742	0.979125	0.095	0.06	0.178	51.4	0.733
H3K9ac	E107	MUS.SKLT.M	Skeletal Muscle Male	Skeletal_Muscle_Male	Core	E107-H3K9ac.tagAlign.gz	24165192	180	0.36996	35	0.332587	1500	0.272047	1.35991	1.61732	0.359	0.345	0.457	80.9	0.918
H3K9ac	E108	MUS.SKLT.F	Skeletal Muscle Female	Skeletal_Muscle_Female	Core	E108-H3K9ac.tagAlign.gz	18468249	180	0.273555	35	0.251439	1500	0.217125	1.25989	1.64449	0.302	0.27	0.39	79.7	0.923
H3K9ac	E110	GI.STMC.MUC	Stomach Mucosa	Stomach_Mucosa	Core	E110-H3K9ac.tagAlign.gz	26918659	230	0.310901	35	0.302346	1500	0.279659	1.11172	1.37712	0.196	0.171	0.295	77.6	0.89
H3K9ac	E111	GI.STMC.MUS	Stomach Smooth Muscle	Stomach_Smooth_Muscle	Core	E111-H3K9ac.tagAlign.gz	30000000	170	0.3135	35	0.310244	1500	0.2946	1.06416	1.20811	0.123	0.104	0.212	72.9	0.876
H3K9ac	E114	LNG.A549.ETOH002.CNCR	A549 EtOH 0.02pct Lung Carcinoma Cell Line	A549_EtOH_0.02pct_Lung_Carcinoma	Core	E114-H3K9ac.tagAlign.gz	30000000	225	0.493103	40	0.457251	1500	0.350892	1.40528	1.33709	0.51	0.513	0.564	84.8	0.914
H3K9ac	E115	BLD.DND41.CNCR	Dnd41 TCell Leukemia Cell Line	Dnd41_TCell_Leukemia	Core	E115-H3K9ac.tagAlign.gz	30000000	215	0.55843	40	0.503723	1500	0.352023	1.58635	1.36063	0.508	0.509	0.541	85	0.915
H3K9ac	E116	BLD.GM12878	GM12878 Lymphoblastoid Cell Line	GM12878_Lymphoblastoid	Core	E116-H3K9ac.tagAlign.gz	17159125	205	0.29858	35	0.282323	1500	0.222835	1.33992	1.27329	0.389	0.369	0.425	79	0.902
H3K9ac	E117	CRVX.HELAS3.CNCR	HeLa-S3 Cervical Carcinoma Cell Line	HeLa-S3_Cervical_Carcinoma	Core	E117-H3K9ac.tagAlign.gz	30000000	220	0.45754	35	0.415647	1500	0.307393	1.48846	1.38699	0.339	0.332	0.395	84.2	0.897
H3K9ac	E118	LIV.HEPG2.CNCR	HepG2 Hepatocellular Carcinoma Cell Line	HepG2_Hepatocellular_Carcinoma	Core	E118-H3K9ac.tagAlign.gz	20884328	190	0.38619	35	0.35472	1500	0.269206	1.43455	1.36801	0.43	0.416	0.482	82.4	0.915
H3K9ac	E119	BRST.HMEC	HMEC Mammary Epithelial Primary Cells	HMEC_Mammary_Epithelial	Core	E119-H3K9ac.tagAlign.gz	17011443	170	0.26139	35	0.249907	1500	0.205016	1.27497	1.25579	0.3	0.275	0.343	77.2	0.857
H3K9ac	E120	MUS.HSMM	HSMM Skeletal Muscle Myoblasts Cell Line	HSMM_Skeletal_Muscle_Myoblasts	Core	E120-H3K9ac.tagAlign.gz	17131169	165	0.278259	35	0.263058	1500	0.208116	1.33704	1.27666	0.348	0.326	0.403	75	0.833
H3K9ac	E121	MUS.HSMMT	HSMM cell derived Skeletal Muscle Myotubes Cell Line	HSMMtube_Skeletal_Muscle_Myotubes_Derived_from_HSMM	Core	E121-H3K9ac.tagAlign.gz	23905364	200	0.351099	35	0.326889	1500	0.269705	1.30179	1.42338	0.384	0.379	0.466	70.7	0.831
H3K9ac	E122	VAS.HUVEC	HUVEC Umbilical Vein Endothelial Cells Cell Line	HUVEC_Umbilical_Vein_Endothelial_Cells	Core	E122-H3K9ac.tagAlign.gz	15979446	200	0.38639	40	0.340453	1500	0.21932	1.76176	1.37923	0.523	0.513	0.55	81.4	0.879
H3K9ac	E123	BLD.K562.CNCR	K562 Leukemia Cell Line	K562_Leukemia	Core	E123-H3K9ac.tagAlign.gz	26133812	210	0.420118	35	0.391932	1500	0.308978	1.3597	1.33977	0.4	0.395	0.465	77.6	0.891
H3K9ac	E124	BLD.CD14.MONO	Monocytes-CD14+ RO01746 Cell Line	Monocytes-CD14+_RO01746	Core	E124-H3K9ac.tagAlign.gz	16055943	270	0.267641	35	0.239923	1500	0.193215	1.3852	1.59344	0.302	0.261	0.367	77.9	0.792
H3K9ac	E125	BRN.NHA	NH-A Astrocytes Cell Line	NH-A_Astrocytes	Core	E125-H3K9ac.tagAlign.gz	30000000	225	0.403582	40	0.378572	1500	0.312557	1.29122	1.37884	0.352	0.337	0.424	85.5	0.955
H3K9ac	E126	SKIN.NHDFAD	NHDF-Ad Adult Dermal Fibroblast Primary Cells	NHDF-Ad_Adult_Dermal_Fibroblasts	Core	E126-H3K9ac.tagAlign.gz	25251057	175	0.350079	35	0.328666	1500	0.272575	1.28434	1.38175	0.277	0.262	0.339	78.4	0.867
H3K9ac	E127	SKIN.NHEK	NHEK-Epidermal Keratinocyte Primary Cells	NHEK-Epidermal_Keratinocytes	Core	E127-H3K9ac.tagAlign.gz	19522411	180	0.424322	45	0.386807	1500	0.252778	1.67864	1.2799	0.509	0.503	0.547	84.7	0.925
H3K9ac	E128	LNG.NHLF	NHLF Lung Fibroblast Primary Cells	NHLF_Lung_Fibroblasts	Core	E128-H3K9ac.tagAlign.gz	15336172	155	0.278415	35	0.252221	1500	0.18136	1.53515	1.36965	0.309	0.277	0.342	72.8	0.805
H3K9me1	E017	LNG.IMR90	IMR90 fetal lung fibroblasts Cell Line	IMR90_Cell_Line	Class1	E017-H3K9me1.tagAlign.gz	32746893	105	0.340502	45	0.325924	1500	0.311597	1.09277	2.01749	0.19	0.15	0.43	21.2	0.405
H3K9me1	E122	VAS.HUVEC	HUVEC Umbilical Vein Endothelial Cells Cell Line	HUVEC_Umbilical_Vein_Endothelial_Cells	Class1	E122-H3K9me1.tagAlign.gz	19354085	195	0.212791	35	0.219799	1500	0.210393	1.0114	0.254953	0.04	0.01	0.17	11.3	0.355
H3K9me1	E123	BLD.K562.CNCR	K562 Leukemia Cell Line	K562_Leukemia	Class1	E123-H3K9me1.tagAlign.gz	23478020	195	0.256393	35	0.259084	1500	0.251016	1.02142	0.66648	0.05	0.02	0.26	16.4	0.401
H3K9me1	E127	SKIN.NHEK	NHEK-Epidermal Keratinocyte Primary Cells	NHEK-Epidermal_Keratinocytes	Class1	E127-H3K9me1.tagAlign.gz	22318128	155	0.238808	35	0.244569	1500	0.235038	1.01604	0.395559	0.05	0.01	0.2	21.8	0.424
H3K9me3	E001	ESC.I3	ES-I3 Cell Line	ES-I3_Cell_Line	Core	E001-H3K9me3.tagAlign.gz	30000000	185	0.299058	35	0.30798	1500	0.287602	1.03983	0.562155	0.058	0.016	0.216	30.1	0.569
H3K9me3	E002	ESC.WA7	ES-WA7 Cell Line	ES-WA7_Cell_Line	Core	E002-H3K9me3.tagAlign.gz	7322985	120	0.0942276	30	0.0997452	1500	0.0907864	1.03791	0.384122	0.133	0.041	0.316	11.9	0.296
H3K9me3	E003	ESC.H1	H1 Cell Line	H1_Cell_Line	Core	E003-H3K9me3.tagAlign.gz	30000000	100	0.296524	30	0.316185	1500	0.279721	1.06007	0.460814	0.133	0.132	0.287	47.3	0.667
H3K9me3	E004	ESDR.H1.BMP4.MESO	H1 BMP4 Derived Mesendoderm Cultured Cells	H1_BMP4_Derived_Mesendoderm_Cultured_Cells	Core	E004-H3K9me3.tagAlign.gz	30000000	130	0.29971	35	0.30466	1500	0.290198	1.03278	0.657761	0.048	0.018	0.163	35	0.554
H3K9me3	E005	ESDR.H1.BMP4.TROP	H1 BMP4 Derived Trophoblast Cultured Cells	H1_BMP4_Derived_Trophoblast_Cultured_Cells	Core	E005-H3K9me3.tagAlign.gz	30000000	115	0.292674	35	0.298616	1500	0.266053	1.10006	0.817506	0.169	0.108	0.397	43.8	0.635
H3K9me3	E006	ESDR.H1.MSC	H1 Derived Mesenchymal Stem Cells	H1_Derived_Mesenchymal_Stem_Cells	Core	E006-H3K9me3.tagAlign.gz	30000000	130	0.307642	35	0.318954	1500	0.292488	1.05181	0.572581	0.092	0.037	0.311	30.2	0.583
H3K9me3	E007	ESDR.H1.NEUR.PROG	H1 Derived Neuronal Progenitor Cultured Cells	H1_Derived_Neuronal_Progenitor_Cultured_Cells	Core	E007-H3K9me3.tagAlign.gz	30000000	125	0.292256	35	0.306096	1500	0.278111	1.05086	0.505463	0.091	0.054	0.21	35.4	0.581
H3K9me3	E008	ESC.H9	H9 Cell Line	H9_Cell_Line	Core	E008-H3K9me3.tagAlign.gz	30000000	120	0.313556	30	0.340654	1500	0.297862	1.05269	0.366757	0.092	0.072	0.287	42	0.609
H3K9me3	E009	ESDR.H9.NEUR.PROG	H9 Derived Neuronal Progenitor Cultured Cells	H9_Derived_Neuronal_Progenitor_Cultured_Cells	Core	E009-H3K9me3.tagAlign.gz	30000000	180	0.306249	35	0.308435	1500	0.297045	1.03099	0.808075	0.084	0.031	0.304	28.1	0.496
H3K9me3	E010	ESDR.H9.NEUR	H9 Derived Neuron Cultured Cells	H9_Derived_Neuron_Cultured_Cells	Core	E010-H3K9me3.tagAlign.gz	30000000	115	0.302264	35	0.304415	1500	0.292884	1.03203	0.813497	0.069	0.014	0.243	19.6	0.383
H3K9me3	E011	ESDR.CD184.ENDO	hESC Derived CD184+ Endoderm Cultured Cells	hESC_Derived_CD184+_Endoderm_Cultured_Cells	Core	E011-H3K9me3.tagAlign.gz	30000000	265	0.312084	35	0.340559	1500	0.299178	1.04314	0.311873	0.178	0.159	0.445	46.8	0.744
H3K9me3	E012	ESDR.CD56.ECTO	hESC Derived CD56+ Ectoderm Cultured Cells	hESC_Derived_CD56+_Ectoderm_Cultured_Cells	Core	E012-H3K9me3.tagAlign.gz	18478765	180	0.225576	35	0.261282	1500	0.216009	1.04429	0.211308	0.076	0.047	0.271	32.7	0.534
H3K9me3	E013	ESDR.CD56.MESO	hESC Derived CD56+ Mesoderm Cultured Cells	hESC_Derived_CD56+_Mesoderm_Cultured_Cells	Core	E013-H3K9me3.tagAlign.gz	30000000	220	0.306734	35	0.338236	1500	0.295612	1.03763	0.260943	0.112	0.092	0.376	51.6	0.751
H3K9me3	E014	ESC.HUES48	HUES48 Cell Line	HUES48_Cell_Line	Core	E014-H3K9me3.tagAlign.gz	30000000	155	0.315878	35	0.353818	1500	0.304484	1.03742	0.230952	0.103	0.125	0.369	55.5	0.784
H3K9me3	E015	ESC.HUES6	HUES6 Cell Line	HUES6_Cell_Line	Core	E015-H3K9me3.tagAlign.gz	30000000	155	0.321685	35	0.353649	1500	0.303286	1.06067	0.365335	0.18	0.185	0.438	50.7	0.761
H3K9me3	E016	ESC.HUES64	HUES64 Cell Line	HUES64_Cell_Line	Core	E016-H3K9me3.tagAlign.gz	30000000	180	0.316975	35	0.361301	1500	0.303893	1.04305	0.227885	0.14	0.192	0.411	59.3	0.816
H3K9me3	E017	LNG.IMR90	IMR90 fetal lung fibroblasts Cell Line	IMR90_Cell_Line	Core	E017-H3K9me3.tagAlign.gz	30000000	130	0.309793	35	0.320319	1500	0.288255	1.07472	0.671718	0.149	0.095	0.387	39.8	0.693
H3K9me3	E018	IPSC.15b	iPS-15b Cell Line	iPS-15b_Cell_Line	Core	E018-H3K9me3.tagAlign.gz	15444243	175	0.195652	35	0.212839	1500	0.184216	1.06208	0.399524	0.112	0.091	0.32	41.9	0.642
H3K9me3	E019	IPSC.18	iPS-18 Cell Line	iPS-18_Cell_Line	Core	E019-H3K9me3.tagAlign.gz	27465155	210	0.297956	35	0.332729	1500	0.288443	1.03298	0.214816	0.081	0.084	0.336	53.4	0.744
H3K9me3	E020	IPSC.20B	iPS-20b Cell Line	iPS-20b_Cell_Line	Core	E020-H3K9me3.tagAlign.gz	28347951	180	0.307072	35	0.355648	1500	0.29267	1.04921	0.228682	0.148	0.184	0.383	63.9	0.817
H3K9me3	E021	IPSC.DF.6.9	iPS DF 6.9 Cell Line	iPS_DF_6.9_Cell_Line	Core	E021-H3K9me3.tagAlign.gz	30000000	110	0.302094	35	0.305513	1500	0.292482	1.03286	0.737667	0.042	0.012	0.191	23.4	0.421
H3K9me3	E022	IPSC.DF.19.11	iPS DF 19.11 Cell Line	iPS_DF_19.11_Cell_Line	Core	E022-H3K9me3.tagAlign.gz	30000000	115	0.30822	35	0.318406	1500	0.291859	1.05606	0.616294	0.096	0.053	0.295	32.1	0.527
H3K9me3	E023	FAT.MSC.DR.ADIP	Mesenchymal Stem Cell Derived Adipocyte Cultured Cells	Mesenchymal_Stem_Cell_Derived_Adipocyte_Cultured_Cells	Core	E023-H3K9me3.tagAlign.gz	30000000	185	0.309081	35	0.319529	1500	0.296918	1.04096	0.537916	0.104	0.066	0.325	50.2	0.73
H3K9me3	E024	ESC.4STAR	ES-UCSF4 Cell Line	4star	Core	E024-H3K9me3.tagAlign.gz	23716344	155	0.303036	35	0.289461	1500	0.26707	1.13467	1.60633	0.119	0.096	0.353	40	0.586
H3K9me3	E025	FAT.ADIP.DR.MSC	Adipose Derived Mesenchymal Stem Cell Cultured Cells	Adipose_Derived_Mesenchymal_Stem_Cell_Cultured_Cells	Core	E025-H3K9me3.tagAlign.gz	30000000	185	0.301845	35	0.312885	1500	0.294783	1.02396	0.39012	0.065	0.03	0.3	42.1	0.684
H3K9me3	E026	STRM.MRW.MSC	Bone Marrow Derived Cultured Mesenchymal Stem Cells	Bone_Marrow_Derived_Mesenchymal_Stem_Cell_Cultured_Cells	Core	E026-H3K9me3.tagAlign.gz	30000000	180	0.297981	35	0.309872	1500	0.292338	1.0193	0.321796	0.045	0.025	0.23	36.4	0.664
H3K9me3	E027	BRST.MYO	Breast Myoepithelial Primary Cells	Breast_Myoepithelial_Cells	Core	E027-H3K9me3.tagAlign.gz	23321153	145	0.267457	35	0.282714	1500	0.248366	1.07687	0.555801	0.21	0.191	0.454	43.8	0.682
H3K9me3	E028	BRST.HMEC.35	Breast variant Human Mammary Epithelial Cells (vHMEC)	Breast_vHMEC	Core	E028-H3K9me3.tagAlign.gz	16619959	315	0.201339	35	0.206521	1500	0.194489	1.03522	0.569322	0.09	0.065	0.41	22.1	0.508
H3K9me3	E029	BLD.CD14.PC	Primary monocytes from peripheral blood	CD14_Primary_Cells	Core	E029-H3K9me3.tagAlign.gz	25333602	200	0.312592	35	0.323066	1500	0.267438	1.16884	0.811721	0.355	0.359	0.527	52.8	0.687
H3K9me3	E030	BLD.CD15.PC	Primary neutrophils from peripheral blood	CD15_Primary_Cells	Core	E030-H3K9me3.tagAlign.gz	24338419	190	0.273724	35	0.289747	1500	0.263148	1.04019	0.397616	0.12	0.097	0.41	48.9	0.709
H3K9me3	E031	BLD.CD19.CPC	Primary B cells from cord blood	CD19_Primary_Cells_Cord_BI	Core	E031-H3K9me3.tagAlign.gz	13943470	140	0.184492	35	0.220213	1500	0.172609	1.06884	0.249622	0.158	0.127	0.343	29.7	0.443
H3K9me3	E032	BLD.CD19.PPC	Primary B cells from peripheral blood	CD19_Primary_Cells_Peripheral_UW	Core	E032-H3K9me3.tagAlign.gz	30000000	155	0.305697	35	0.317873	1500	0.298049	1.02566	0.385778	0.094	0.063	0.295	43.8	0.652
H3K9me3	E033	BLD.CD3.CPC	Primary T cells from cord blood	CD3_Primary_Cells_Cord_BI	Core	E033-H3K9me3.tagAlign.gz	14292311	135	0.189477	35	0.227553	1500	0.177953	1.06475	0.232325	0.142	0.108	0.39	27.6	0.419
H3K9me3	E034	BLD.CD3.PPC	Primary T cells from peripheral blood	CD3_Primary_Cells_Peripheral_UW	Core	E034-H3K9me3.tagAlign.gz	15811716	165	0.206775	35	0.237581	1500	0.197101	1.04908	0.238991	0.135	0.113	0.365	32.9	0.449
H3K9me3	E035	BLD.CD34.PC	Primary hematopoietic stem cells	CD34_Primary_Cells	Core	E035-H3K9me3.tagAlign.gz	14536824	130	0.195553	35	0.227709	1500	0.178532	1.09534	0.346121	0.215	0.206	0.424	42.7	0.62
H3K9me3	E036	BLD.CD34.CC	Primary hematopoietic stem cells short term culture	CD34_Cultured_Cells	Core	E036-H3K9me3.tagAlign.gz	26103738	130	0.280254	35	0.313818	1500	0.266149	1.05299	0.295881	0.111	0.083	0.275	50	0.705
H3K9me3	E037	BLD.CD4.MPC	Primary T helper memory cells from peripheral blood 2	CD4_Memory_Primary_Cells	Core	E037-H3K9me3.tagAlign.gz	30000000	225	0.29632	35	0.30815	1500	0.291567	1.0163	0.286645	0.028	0.015	0.142	30.7	0.595
H3K9me3	E038	BLD.CD4.NPC	Primary T helper naive cells from peripheral blood	CD4_Naive_Primary_Cells	Core	E038-H3K9me3.tagAlign.gz	30000000	215	0.295789	35	0.309194	1500	0.290603	1.01784	0.278914	0.025	0.015	0.121	26.7	0.546
H3K9me3	E039	BLD.CD4.CD25M.CD45RA.NPC	Primary T helper naive cells from peripheral blood	CD4+_CD25-_CD45RA+_Naive_Primary_Cells	Core	E039-H3K9me3.tagAlign.gz	30000000	215	0.296113	35	0.309518	1500	0.291689	1.01517	0.248155	0.041	0.019	0.172	43.4	0.668
H3K9me3	E040	BLD.CD4.CD25M.CD45RO.MPC	Primary T helper memory cells from peripheral blood 1	CD4+_CD25-_CD45RO+_Memory_Primary_Cells	Core	E040-H3K9me3.tagAlign.gz	27340291	220	0.278072	35	0.300759	1500	0.271574	1.02393	0.222661	0.04	0.024	0.18	33.1	0.606
H3K9me3	E041	BLD.CD4.CD25M.IL17M.PL.TPC	Primary T helper cells PMA-I stimulated	CD4+_CD25-_IL17-_PMA-Ionomycin_stimulated_MACS_purified_Th_Primary_Cells	Core	E041-H3K9me3.tagAlign.gz	30000000	215	0.298725	35	0.3103	1500	0.293331	1.01839	0.31788	0.045	0.025	3	43.9	0.684
H3K9me3	E042	BLD.CD4.CD25M.IL17P.PL.TPC	Primary T helper 17 cells PMA-I stimulated	CD4+_CD25-_IL17+_PMA-Ionomcyin_stimulated_Th17_Primary_Cells	Core	E042-H3K9me3.tagAlign.gz	30000000	225	0.295169	35	0.307658	1500	0.290625	1.01563	0.266768	0.034	0.015	0.152	33.3	0.612
H3K9me3	E043	BLD.CD4.CD25M.TPC	Primary T helper cells from peripheral blood	CD4+_CD25-_Th_Primary_Cells	Core	E043-H3K9me3.tagAlign.gz	30000000	240	0.299218	35	0.318042	1500	0.292503	1.02296	0.262937	0.055	0.031	0.241	50.1	0.726
H3K9me3	E044	BLD.CD4.CD25.CD127M.TREGPC	Primary T regulatory cells from peripheral blood	CD4+_CD25+_CD127-_Treg_Primary_Cells	Core	E044-H3K9me3.tagAlign.gz	30000000	215	0.301364	35	0.322632	1500	0.294343	1.02386	0.248216	0.059	0.039	0.282	48.4	0.724
H3K9me3	E045	BLD.CD4.CD25I.CD127.TMEMPC	Primary T cells effector/memory enriched from peripheral blood	CD4+_CD25int_CD127+_Tmem_Primary_Cells	Core	E045-H3K9me3.tagAlign.gz	26489913	225	0.270832	35	0.290637	1500	0.264777	1.02287	0.234153	0.034	0.017	0.159	31.7	0.574
H3K9me3	E046	BLD.CD56.PC	Primary Natural Killer cells from peripheral blood	CD56_Primary_Cells	Core	E046-H3K9me3.tagAlign.gz	16243150	180	0.20467	35	0.217436	1500	0.186735	1.09604	0.584189	0.225	0.177	0.395	40.8	0.636
H3K9me3	E047	BLD.CD8.NPC	Primary T killer naive cells from peripheral blood	CD8_Naive_Primary_Cells	Core	E047-H3K9me3.tagAlign.gz	30000000	310	0.297466	35	0.30843	1500	0.292098	1.01838	0.328729	0.038	0.021	0.153	43.7	0.683
H3K9me3	E048	BLD.CD8.MPC	Primary T killer memory cells from peripheral blood	CD8_Memory_Primary_Cells	Core	E048-H3K9me3.tagAlign.gz	30000000	235	0.296023	35	0.307305	1500	0.29103	1.01716	0.306787	0.025	0.015	0.125	29.1	0.574
H3K9me3	E049	STRM.CHON.MRW.DR.MSC	Mesenchymal Stem Cell Derived Chondrocyte Cultured Cells	Chondrocytes_from_Bone_Marrow_Derived_Mesenchymal_Stem_Cell_Cultured_Cells	Core	E049-H3K9me3.tagAlign.gz	30000000	180	0.300038	35	0.315952	1500	0.292941	1.02422	0.308402	0.06	0.033	0.304	41.7	0.707
H3K9me3	E050	BLD.MOB.CD34.PC.F	Primary hematopoietic stem cells G-CSF-mobilized Female	Mobilized_CD34_Primary_Cells_Female	Core	E050-H3K9me3.tagAlign.gz	30000000	145	0.301324	35	0.322341	1500	0.290597	1.03691	0.337911	0.118	0.079	0.321	52.5	0.732
H3K9me3	E051	BLD.MOB.CD34.PC.M	Primary hematopoietic stem cells G-CSF-mobilized Male	Mobilized_CD34_Primary_Cells_Male	Core	E051-H3K9me3.tagAlign.gz	24606120	135	0.285288	35	0.30329	1500	0.267122	1.068	0.502255	0.268	0.29	0.522	54.9	0.763
H3K9me3	E052	MUS.SAT	Muscle Satellite Cultured Cells	Muscle_Satellite_Cultured_Cells	Core	E052-H3K9me3.tagAlign.gz	30000000	175	0.295908	35	0.308349	1500	0.290428	1.01887	0.305782	0.031	0.016	0.196	25.2	0.58
H3K9me3	E053	BRN.CRTX.DR.NRSPHR	Cortex derived primary cultured neurospheres	Neurosphere_Cultured_Cells_Cortex_Derived	Core	E053-H3K9me3.tagAlign.gz	15968390	165	0.19719	35	0.209427	1500	0.188444	1.04641	0.416812	0.164	0.145	0.381	49	0.697
H3K9me3	E054	BRN.GANGEM.DR.NRSPHR	Ganglion Eminence derived primary cultured neurospheres	Neurosphere_Cultured_Cells_Ganglionic_Eminence_Derived	Core	E054-H3K9me3.tagAlign.gz	21615461	150	0.242975	35	0.253092	1500	0.234733	1.03511	0.448925	0.123	0.084	0.339	48.3	0.699
H3K9me3	E055	SKIN.PEN.FRSK.FIB.01	Foreskin Fibroblast Primary Cells skin01	Penis_Foreskin_Fibroblast_Primary_Cells_skin01	Core	E055-H3K9me3.tagAlign.gz	30000000	140	0.316602	35	0.313493	1500	0.299546	1.05694	1.22295	0.151	0.109	0.484	37.7	0.627
H3K9me3	E056	SKIN.PEN.FRSK.FIB.02	Foreskin Fibroblast Primary Cells skin02	Penis_Foreskin_Fibroblast_Primary_Cells_skin02	Core	E056-H3K9me3.tagAlign.gz	30000000	170	0.306455	35	0.306807	1500	0.2985	1.02665	0.957626	0.08	0.02	0.415	31.5	0.57
H3K9me3	E057	SKIN.PEN.FRSK.KER.02	Foreskin Keratinocyte Primary Cells skin02	Penis_Foreskin_Keratinocyte_Primary_Cells_skin02	Core	E057-H3K9me3.tagAlign.gz	9888165	145	0.135088	35	0.138929	1500	0.127005	1.06364	0.677884	0.248	0.241	0.47	40.3	0.6
H3K9me3	E058	SKIN.PEN.FRSK.KER.03	Foreskin Keratinocyte Primary Cells skin03	Penis_Foreskin_Keratinocyte_Primary_Cells_skin03	Core	E058-H3K9me3.tagAlign.gz	30000000	180	0.318874	35	0.310724	1500	0.299145	1.06595	1.70379	0.086	0.058	0.391	37.5	0.613
H3K9me3	E059	SKIN.PEN.FRSK.MEL.01	Foreskin Melanocyte Primary Cells skin01	Penis_Foreskin_Melanocyte_Primary_Cells_skin01	Core	E059-H3K9me3.tagAlign.gz	20445766	145	0.233626	35	0.234144	1500	0.22466	1.03991	0.945314	0.102	0.054	0.306	43.1	0.633
H3K9me3	E061	SKIN.PEN.FRSK.MEL.03	Foreskin Melanocyte Primary Cells skin03	Penis_Foreskin_Melanocyte_Primary_Cells_skin03	Core	E061-H3K9me3.tagAlign.gz	25015133	140	0.286532	35	0.274236	1500	0.260233	1.10106	1.87808	0.117	0.095	0.36	38.5	0.589
H3K9me3	E062	BLD.PER.MONUC.PC	Primary mononuclear cells from peripheral blood	Peripheral_Blood_Mononuclear_Primary_Cells	Core	E062-H3K9me3.tagAlign.gz	30000000	295	0.296055	35	0.302915	1500	0.289021	1.02434	0.506253	0.059	0.031	0.193	54.7	0.749
H3K9me3	E063	FAT.ADIP.NUC	Adipose Nuclei	Adipose_Nuclei	Core	E063-H3K9me3.tagAlign.gz	30000000	155	0.305771	35	0.323001	1500	0.295266	1.03558	0.378755	0.101	0.07	0.304	54.4	0.763
H3K9me3	E065	HRT.AOR	Aorta	Aorta	Core	E065-H3K9me3.tagAlign.gz	27455320	125	0.308797	35	0.302434	1500	0.275265	1.12182	1.23423	0.178	0.098	0.419	33.8	0.571
H3K9me3	E066	LIV.ADLT	Liver	Adult_Liver	Core	E066-H3K9me3.tagAlign.gz	30000000	155	0.30751	35	0.327766	1500	0.296323	1.03775	0.355774	0.094	0.068	0.33	50.3	0.746
H3K9me3	E067	BRN.ANG.GYR	Brain Angular Gyrus	Brain_Angular_Gyrus	Core	E067-H3K9me3.tagAlign.gz	30000000	175	0.295115	35	0.30573	1500	0.289694	1.01871	0.338067	0.037	0.015	0.152	34.2	0.586
H3K9me3	E068	BRN.ANT.CAUD	Brain Anterior Caudate	Brain_Anterior_Caudate	Core	E068-H3K9me3.tagAlign.gz	30000000	155	0.300305	35	0.314993	1500	0.291954	1.0286	0.362468	0.058	0.027	0.225	42.1	0.656
H3K9me3	E069	BRN.CING.GYR	Brain Cingulate Gyrus	Brain_Cingulate_Gyrus	Core	E069-H3K9me3.tagAlign.gz	30000000	170	0.296013	35	0.308085	1500	0.290321	1.01961	0.320417	0.044	0.019	0.171	39.5	0.633
H3K9me3	E070	BRN.GRM.MTRX	Brain Germinal Matrix	Brain_Germinal_Matrix	Core	E070-H3K9me3.tagAlign.gz	11098064	115	0.149215	35	0.153432	1500	0.138435	1.07787	0.718795	0.23	0.228	0.405	43.6	0.632
H3K9me3	E071	BRN.HIPP.MID	Brain Hippocampus Middle	Brain_Hippocampus_Middle	Core	E071-H3K9me3.tagAlign.gz	30000000	235	0.297645	35	0.314104	1500	0.291042	1.02269	0.286336	0.055	0.022	0.231	46.1	0.702
H3K9me3	E072	BRN.INF.TMP	Brain Inferior Temporal Lobe	Brain_Inferior_Temporal_Lobe	Core	E072-H3K9me3.tagAlign.gz	30000000	195	0.29659	35	0.311453	1500	0.289993	1.02275	0.30739	0.051	0.021	0.2	43.9	0.679
H3K9me3	E073	BRN.DL.PRFRNTL.CRTX	Brain_Dorsolateral_Prefrontal_Cortex	Brain_Mid_Frontal_Lobe	Core	E073-H3K9me3.tagAlign.gz	30000000	155	0.296051	35	0.307963	1500	0.290021	1.02079	0.336067	0.043	0.018	0.167	36.8	0.609
H3K9me3	E074	BRN.SUB.NIG	Brain Substantia Nigra	Brain_Substantia_Nigra	Core	E074-H3K9me3.tagAlign.gz	30000000	160	0.29623	35	0.308227	1500	0.290722	1.01895	0.314666	0.048	0.019	0.181	40.9	0.645
H3K9me3	E075	GI.CLN.MUC	Colonic Mucosa	Colonic_Mucosa	Core	E075-H3K9me3.tagAlign.gz	11472457	155	0.144852	35	0.163316	1500	0.139314	1.03976	0.230745	0.121	0.064	0.258	34	0.571
H3K9me3	E076	GI.CLN.SM.MUS	Colon Smooth Muscle	Colon_Smooth_Muscle	Core	E076-H3K9me3.tagAlign.gz	30000000	225	0.293526	35	0.305836	1500	0.288629	1.01696	0.284555	0.028	0.014	0.121	35.6	0.584
H3K9me3	E077	GI.DUO.MUC	Duodenum Mucosa	Duodenum_Mucosa	Core	E077-H3K9me3.tagAlign.gz	25131617	150	0.269467	35	0.286239	1500	0.262741	1.0256	0.286213	0.075	0.046	0.312	42.9	0.67
H3K9me3	E078	GI.DUO.SM.MUS	Duodenum Smooth Muscle	Duodenum_Smooth_Muscle	Core	E078-H3K9me3.tagAlign.gz	30000000	220	0.296405	35	0.314524	1500	0.288961	1.02576	0.291201	0.068	0.036	0.246	52.1	0.748
H3K9me3	E079	GI.ESO	Esophagus	Esophagus	Core	E079-H3K9me3.tagAlign.gz	19123277	135	0.235901	35	0.238106	1500	0.21129	1.11648	0.917784	0.194	0.11	0.42	40.7	0.629
H3K9me3	E080	ADRL.GLND.FET	Fetal Adrenal Gland	Fetal_Adrenal_Gland	Core	E080-H3K9me3.tagAlign.gz	17483622	215	0.229768	35	0.263634	1500	0.212338	1.08208	0.33979	0.205	0.205	0.432	32.4	0.521
H3K9me3	E081	BRN.FET.M	Fetal Brain Male	Fetal_Brain_Male	Core	E081-H3K9me3.tagAlign.gz	30000000	140	0.29608	35	0.316252	1500	0.289055	1.0243	0.258299	0.045	0.025	0.159	26.2	0.459
H3K9me3	E082	BRN.FET.F	Fetal Brain Female	Fetal_Brain_Female	Core	E082-H3K9me3.tagAlign.gz	30000000	135	0.303932	35	0.312056	1500	0.295486	1.02858	0.509728	0.083	0.07	0.295	48.5	0.677
H3K9me3	E083	HRT.FET	Fetal Heart	Fetal_Heart	Core	E083-H3K9me3.tagAlign.gz	17982142	125	0.203425	35	0.215233	1500	0.198164	1.02655	0.308247	0.057	0.02	0.171	14.8	0.33
H3K9me3	E084	GI.L.INT.FET	Fetal Intestine Large	Fetal_Intestine_Large	Core	E084-H3K9me3.tagAlign.gz	16222704	180	0.201482	35	0.218419	1500	0.184351	1.09293	0.502851	0.182	0.154	0.368	36.1	0.515
H3K9me3	E085	GI.S.INT.FET	Fetal Intestine Small	Fetal_Intestine_Small	Core	E085-H3K9me3.tagAlign.gz	23116257	170	0.261832	35	0.265956	1500	0.241299	1.08509	0.832742	0.181	0.147	0.35	49.6	0.667
H3K9me3	E086	KID.FET	Fetal Kidney	Fetal_Kidney	Core	E086-H3K9me3.tagAlign.gz	27700402	90	0.28044	35	0.290754	1500	0.274588	1.02131	0.362032	0.035	0.016	0.105	16.3	0.339
H3K9me3	E087	PANC.ISLT	Pancreatic Islets	Pancreatic_Islets	Core	E087-H3K9me3.tagAlign.gz	22101115	135	0.247032	35	0.260235	1500	0.237353	1.04078	0.422998	0.108	0.059	0.317	32.4	0.541
H3K9me3	E088	LNG.FET	Fetal Lung	Fetal_Lung	Core	E088-H3K9me3.tagAlign.gz	30000000	160	0.298844	35	0.315549	1500	0.291868	1.0239	0.294576	0.052	0.028	0.19	39.4	0.635
H3K9me3	E089	MUS.TRNK.FET	Fetal Muscle Trunk	Fetal_Muscle_Trunk	Core	E089-H3K9me3.tagAlign.gz	19336164	150	0.221411	35	0.241019	1500	0.215566	1.02711	0.22963	0.099	0.064	0.322	35	0.57
H3K9me3	E090	MUS.LEG.FET	Fetal Muscle Leg	Fetal_Muscle_Leg	Core	E090-H3K9me3.tagAlign.gz	25759731	150	0.273871	35	0.287113	1500	0.264718	1.03458	0.408728	0.104	0.056	0.322	43.6	0.652
H3K9me3	E091	PLCNT.FET	Placenta	Fetal_Placenta	Core	E091-H3K9me3.tagAlign.gz	23924737	190	0.266879	35	0.273339	1500	0.248805	1.07265	0.736712	0.167	0.115	0.355	36.6	0.587
H3K9me3	E092	GI.STMC.FET	Fetal Stomach	Fetal_Stomach	Core	E092-H3K9me3.tagAlign.gz	16402941	180	0.206954	35	0.229821	1500	0.191591	1.08018	0.401856	0.189	0.172	0.377	49.2	0.674
H3K9me3	E093	THYM.FET	Fetal Thymus	Fetal_Thymus	Core	E093-H3K9me3.tagAlign.gz	14802364	180	0.183262	35	0.190962	1500	0.170759	1.07322	0.618884	0.167	0.104	0.349	35.2	0.509
H3K9me3	E094	GI.STMC.GAST	Gastric	Gastric	Core	E094-H3K9me3.tagAlign.gz	17010399	135	0.20525	35	0.216201	1500	0.192288	1.06741	0.542032	0.119	0.045	0.309	33.7	0.599
H3K9me3	E095	HRT.VENT.L	Left Ventricle	Left_Ventricle	Core	E095-H3K9me3.tagAlign.gz	18215079	140	0.217514	35	0.244518	1500	0.199938	1.0879	0.394238	0.155	0.08	0.343	35.6	0.627
H3K9me3	E096	LNG	Lung	Lung	Core	E096-H3K9me3.tagAlign.gz	26030514	125	0.308627	35	0.298859	1500	0.26541	1.16283	1.29203	0.252	0.172	0.507	43.6	0.644
H3K9me3	E097	OVRY	Ovary	Ovary	Core	E097-H3K9me3.tagAlign.gz	25814257	90	0.273568	40	0.273633	1500	0.260702	1.04935	0.994946	0.057	0.014	0.208	22.7	0.476
H3K9me3	E098	PANC	Pancreas	Pancreas	Core	E098-H3K9me3.tagAlign.gz	16517475	145	0.208613	35	0.212018	1500	0.187681	1.11153	0.860079	0.199	0.114	0.418	36.5	0.604
H3K9me3	E099	PLCNT.AMN	Placenta Amnion	Placenta_Amnion	Core	E099-H3K9me3.tagAlign.gz	20470349	195	0.222831	35	0.227168	1500	0.219776	1.0139	0.413295	0.027	0.013	0.118	20.4	0.389
H3K9me3	E100	MUS.PSOAS	Psoas Muscle	Psoas_Muscle	Core	E100-H3K9me3.tagAlign.gz	24435553	150	0.259692	35	0.262825	1500	0.252072	1.03023	0.708612	0.047	0.012	0.212	21.4	0.479
H3K9me3	E101	GI.RECT.MUC.29	Rectal Mucosa Donor 29	Rectal_Mucosa.Donor_29	Core	E101-H3K9me3.tagAlign.gz	25399408	140	0.265779	35	0.278305	1500	0.260325	1.02095	0.30329	0.047	0.023	0.183	34.8	0.587
H3K9me3	E102	GI.RECT.MUC.31	Rectal Mucosa Donor 31	Rectal_Mucosa.Donor_31	Core	E102-H3K9me3.tagAlign.gz	30000000	155	0.298605	35	0.308025	1500	0.293433	1.01763	0.354436	0.036	0.018	0.167	28.4	0.53
H3K9me3	E103	GI.RECT.SM.MUS	Rectal Smooth Muscle	Rectal_Smooth_Muscle	Core	E103-H3K9me3.tagAlign.gz	17983778	145	0.204253	35	0.217298	1500	0.198272	1.03016	0.314331	0.066	0.025	0.189	29.7	0.519
H3K9me3	E104	HRT.ATR.R	Right Atrium	Right_Atrium	Core	E104-H3K9me3.tagAlign.gz	30000000	140	0.304504	35	0.305501	1500	0.2934	1.03784	0.917615	0.054	0.011	0.211	27.6	0.494
H3K9me3	E105	HRT.VNT.R	Right Ventricle	Right_Ventricle	Core	E105-H3K9me3.tagAlign.gz	30000000	145	0.300953	35	0.301532	1500	0.291686	1.03177	0.941183	0.041	0.01	0.199	22.7	0.494
H3K9me3	E106	GI.CLN.SIG	Sigmoid Colon	Sigmoid_Colon	Core	E106-H3K9me3.tagAlign.gz	30000000	145	0.301944	35	0.310413	1500	0.290377	1.03983	0.577292	0.064	0.023	0.208	39.3	0.651
H3K9me3	E107	MUS.SKLT.M	Skeletal Muscle Male	Skeletal_Muscle_Male	Core	E107-H3K9me3.tagAlign.gz	26170023	150	0.270907	35	0.281595	1500	0.265639	1.01983	0.330133	0.044	0.016	0.165	29.2	0.525
H3K9me3	E108	MUS.SKLT.F	Skeletal Muscle Female	Skeletal_Muscle_Female	Core	E108-H3K9me3.tagAlign.gz	27308448	140	0.279334	35	0.289042	1500	0.27411	1.01906	0.349821	0.041	0.014	0.169	30.1	0.565
H3K9me3	E109	GI.S.INT	Small Intestine	Small_Intestine	Core	E109-H3K9me3.tagAlign.gz	8151498	150	0.110229	40	0.121024	1500	0.103028	1.06989	0.400124	0.163	0.072	0.292	29.1	0.449
H3K9me3	E110	GI.STMC.MUC	Stomach Mucosa	Stomach_Mucosa	Core	E110-H3K9me3.tagAlign.gz	20887596	240	0.226636	35	0.235524	1500	0.222615	1.01806	0.311473	0.032	0.012	0.108	22.8	0.425
H3K9me3	E111	GI.STMC.MUS	Stomach Smooth Muscle	Stomach_Smooth_Muscle	Core	E111-H3K9me3.tagAlign.gz	23606699	155	0.257714	35	0.267905	1500	0.24883	1.0357	0.465743	0.067	0.026	0.277	27.5	0.52
H3K9me3	E112	THYM	Thymus	Thymus	Core	E112-H3K9me3.tagAlign.gz	26208477	90	0.282464	40	0.282824	1500	0.266202	1.06109	0.978345	0.071	0.02	0.257	20.9	0.375
H3K9me3	E113	SPLN	Spleen	Spleen	Core	E113-H3K9me3.tagAlign.gz	14286063	135	0.191842	35	0.204139	1500	0.172522	1.11199	0.611078	0.225	0.171	0.418	46.2	0.68
H3K9me3	E114	LNG.A549.ETOH002.CNCR	A549 EtOH 0.02pct Lung Carcinoma Cell Line	A549_EtOH_0.02pct_Lung_Carcinoma	Core	E114-H3K9me3.tagAlign.gz	30000000	245	0.301272	35	0.305104	1500	0.297388	1.01306	0.503403	0.046	0.014	0.213	32.6	0.563
H3K9me3	E115	BLD.DND41.CNCR	Dnd41 TCell Leukemia Cell Line	Dnd41_TCell_Leukemia	Core	E115-H3K9me3.tagAlign.gz	30000000	150	0.308733	35	0.321741	1500	0.297745	1.0369	0.457906	0.09	0.056	0.254	44.4	0.632
H3K9me3	E116	BLD.GM12878	GM12878 Lymphoblastoid Cell Line	GM12878_Lymphoblastoid	Core	E116-H3K9me3.tagAlign.gz	30000000	160	0.307021	35	0.315871	1500	0.296487	1.03553	0.543418	0.111	0.068	0.284	35.2	0.533
H3K9me3	E117	CRVX.HELAS3.CNCR	HeLa-S3 Cervical Carcinoma Cell Line	HeLa-S3_Cervical_Carcinoma	Core	E117-H3K9me3.tagAlign.gz	30000000	145	0.300967	35	0.306251	1500	0.294532	1.02185	0.549087	0.028	0.009	0.142	17.3	0.407
H3K9me3	E118	LIV.HEPG2.CNCR	HepG2 Hepatocellular Carcinoma Cell Line	HepG2_Hepatocellular_Carcinoma	Core	E118-H3K9me3.tagAlign.gz	30000000	235	0.322765	35	0.330832	1500	0.314041	1.02778	0.519562	0.095	0.162	0.438	21.4	0.451
H3K9me3	E119	BRST.HMEC	HMEC Mammary Epithelial Primary Cells	HMEC_Mammary_Epithelial	Core	E119-H3K9me3.tagAlign.gz	17334631	150	0.215802	35	0.237519	1500	0.206018	1.04749	0.310589	0.155	0.138	0.417	32.8	0.627
H3K9me3	E120	MUS.HSMM	HSMM Skeletal Muscle Myoblasts Cell Line	HSMM_Skeletal_Muscle_Myoblasts	Core	E120-H3K9me3.tagAlign.gz	30000000	140	0.30056	35	0.307374	1500	0.291637	1.0306	0.56701	0.048	0.016	0.155	27.1	0.525
H3K9me3	E121	MUS.HSMMT	HSMM cell derived Skeletal Muscle Myotubes Cell Line	HSMMtube_Skeletal_Muscle_Myotubes_Derived_from_HSMM	Core	E121-H3K9me3.tagAlign.gz	30000000	145	0.299688	35	0.30504	1500	0.29221	1.02559	0.582881	0.047	0.013	0.158	29.3	0.531
H3K9me3	E122	VAS.HUVEC	HUVEC Umbilical Vein Endothelial Cells Cell Line	HUVEC_Umbilical_Vein_Endothelial_Cells	Core	E122-H3K9me3.tagAlign.gz	30000000	140	0.306655	35	0.314089	1500	0.2979	1.02939	0.540832	0.066	0.027	0.381	16	0.464
H3K9me3	E123	BLD.K562.CNCR	K562 Leukemia Cell Line	K562_Leukemia	Core	E123-H3K9me3.tagAlign.gz	30000000	120	0.302889	35	0.306057	1500	0.296808	1.02049	0.657489	0.038	0.017	0.17	14.7	0.33
H3K9me3	E124	BLD.CD14.MONO	Monocytes-CD14+ RO01746 Cell Line	Monocytes-CD14+_RO01746	Core	E124-H3K9me3.tagAlign.gz	21656842	235	0.255788	35	0.278313	1500	0.246018	1.03971	0.302537	0.162	0.145	0.461	52.4	0.739
H3K9me3	E125	BRN.NHA	NH-A Astrocytes Cell Line	NH-A_Astrocytes	Core	E125-H3K9me3.tagAlign.gz	30000000	155	0.299532	35	0.306378	1500	0.291606	1.02718	0.536506	0.041	0.015	0.147	29	0.552
H3K9me3	E126	SKIN.NHDFAD	NHDF-Ad Adult Dermal Fibroblast Primary Cells	NHDF-Ad_Adult_Dermal_Fibroblasts	Core	E126-H3K9me3.tagAlign.gz	30000000	150	0.299497	35	0.305497	1500	0.292783	1.02293	0.528074	0.03	0.011	0.155	19.4	0.458
H3K9me3	E127	SKIN.NHEK	NHEK-Epidermal Keratinocyte Primary Cells	NHEK-Epidermal_Keratinocytes	Core	E127-H3K9me3.tagAlign.gz	30000000	140	0.305078	35	0.311357	1500	0.296844	1.02774	0.56734	0.066	0.03	0.307	33.3	0.59
H3K9me3	E128	LNG.NHLF	NHLF Lung Fibroblast Primary Cells	NHLF_Lung_Fibroblasts	Core	E128-H3K9me3.tagAlign.gz	30000000	125	0.297896	35	0.302241	1500	0.292009	1.02016	0.575375	0.035	0.012	0.169	22.2	0.457
H3K9me3	E129	BONE.OSTEO	Osteoblast Primary Cells	Osteoblasts	Core	E129-H3K9me3.tagAlign.gz	30000000	135	0.299531	35	0.302884	1500	0.2937	1.01985	0.634919	0.033	0.012	0.201	20.2	0.484
H3T11ph	E008	ESC.H9	H9 Cell Line	H9_Cell_Line	Class1	E008-H3T11ph.tagAlign.gz	37086637	120	0.270051	35	0.263145	1500	0.253631	1.06474	1.72588	0.06	0.02	0.16
H4K12ac	E005	ESDR.H1.BMP4.TROP	H1 BMP4 Derived Trophoblast Cultured Cells	H1_BMP4_Derived_Trophoblast_Cultured_Cells	Class1	E005-H4K12ac.tagAlign.gz	30826262	140	0.335375	35	0.325607	1500	0.30199	1.11055	1.4136	0.19	0.13	0.45
H4K20me1	E003	ESC.H1	H1 Cell Line	H1_Cell_Line	Class1	E003-H4K20me1.tagAlign.gz	27645564	90	0.293591	35	0.298113	1500	0.277897	1.05648	0.776315	0.11	0.04	0.29	21.5	0.436
H4K20me1	E008	ESC.H9	H9 Cell Line	H9_Cell_Line	Class1	E008-H4K20me1.tagAlign.gz	6325296	85	0.088236	30	0.0936378	1500	0.0825425	1.06898	0.513144	0.16	0.03	0.28	5.2	0.207
H4K20me1	E017	LNG.IMR90	IMR90 fetal lung fibroblasts Cell Line	IMR90_Cell_Line	Class1	E017-H4K20me1.tagAlign.gz	39487740	100	0.398246	35	0.391284	1500	0.368132	1.0818	1.30066	0.21	0.22	0.42	56.1	0.698
H4K20me1	E114	LNG.A549.ETOH002.CNCR	A549 EtOH 0.02pct Lung Carcinoma Cell Line	A549_EtOH_0.02pct_Lung_Carcinoma	Class 1	E114-H4K20me1.tagAlign.gz	42726283	230	0.384003	35	0.39191	1500	0.37827	1.01516	0.420343	0.14	0.06	0.31	44.9	0.624
H4K20me1	E115	BLD.DND41.CNCR	Dnd41 TCell Leukemia Cell Line	Dnd41_TCell_Leukemia	Class1	E115-H4K20me1.tagAlign.gz	43636369	125	0.400346	35	0.403912	1500	0.387476	1.03322	0.783064	0.12	0.1	0.35	51.5	0.701
H4K20me1	E116	BLD.GM12878	GM12878 Lymphoblastoid Cell Line	GM12878_Lymphoblastoid	Class1	E116-H4K20me1.tagAlign.gz	19169315	180	0.212839	35	0.220362	1500	0.208863	1.01903	0.345703	0.07	0.01	0.22	19.5	0.375
H4K20me1	E117	CRVX.HELAS3.CNCR	HeLa-S3 Cervical Carcinoma Cell Line	HeLa-S3_Cervical_Carcinoma	Class1	E117-H4K20me1.tagAlign.gz	20068196	155	0.230639	35	0.238579	1500	0.219312	1.05165	0.587926	0.07	0.02	0.22	27	0.47
H4K20me1	E118	LIV.HEPG2.CNCR	HepG2 Hepatocellular Carcinoma Cell Line	HepG2_Hepatocellular_Carcinoma	Class1	E118-H4K20me1.tagAlign.gz	21832970	170	0.249625	35	0.256691	1500	0.244232	1.02208	0.432896	0.1	0.07	0.28	43.7	0.599
H4K20me1	E119	BRST.HMEC	HMEC Mammary Epithelial Primary Cells	HMEC_Mammary_Epithelial	Class1	E119-H4K20me1.tagAlign.gz	30101463	135	0.294586	35	0.304523	1500	0.290173	1.01521	0.307523	0.03	0.01	0.12	25.4	0.385
H4K20me1	E120	MUS.HSMM	HSMM Skeletal Muscle Myoblasts Cell Line	HSMM_Skeletal_Muscle_Myoblasts	Class1	E120-H4K20me1.tagAlign.gz	19531580	155	0.221175	35	0.22942	1500	0.214095	1.03307	0.462025	0.09	0.04	0.23	32.1	0.494
H4K20me1	E121	MUS.HSMMT	HSMM cell derived Skeletal Muscle Myotubes Cell Line	HSMMtube_Skeletal_Muscle_Myotubes_Derived_from_HSMM	Class1	E121-H4K20me1.tagAlign.gz	20298864	165	0.235836	35	0.243281	1500	0.22694	1.0392	0.544393	0.13	0.11	0.31	40.1	0.552
H4K20me1	E122	VAS.HUVEC	HUVEC Umbilical Vein Endothelial Cells Cell Line	HUVEC_Umbilical_Vein_Endothelial_Cells	Class1	E122-H4K20me1.tagAlign.gz	24713091	185	0.257498	35	0.265955	1500	0.254086	1.01343	0.287485	0.05	0.01	0.19	28.4	0.457
H4K20me1	E123	BLD.K562.CNCR	K562 Leukemia Cell Line	K562_Leukemia	Class1	E123-H4K20me1.tagAlign.gz	26169550	205	0.281944	35	0.288226	1500	0.275222	1.02442	0.516901	0.09	0.05	0.34	28.8	0.507
H4K20me1	E124	BLD.CD14.MONO	Monocytes-CD14+ RO01746 Cell Line	Monocytes-CD14+_RO01746	Class1	E124-H4K20me1.tagAlign.gz	20540315	210	0.28413	35	0.292231	1500	0.272768	1.04165	0.583771	0.35	0.5	0.61	46	0.65
H4K20me1	E125	BRN.NHA	NH-A Astrocytes Cell Line	NH-A_Astrocytes	Class1	E125-H4K20me1.tagAlign.gz	45000000	180	0.399553	35	0.405154	1500	0.390743	1.02255	0.611303	0.22	0.19	0.39	57.6	0.791
H4K20me1	E126	SKIN.NHDFAD	NHDF-Ad Adult Dermal Fibroblast Primary Cells	NHDF-Ad_Adult_Dermal_Fibroblasts	Class1	E126-H4K20me1.tagAlign.gz	8380851	265	0.112583	35	0.122507	1500	0.108247	1.04005	0.304043	0.19	0.12	0.35	38.1	0.539
H4K20me1	E127	SKIN.NHEK	NHEK-Epidermal Keratinocyte Primary Cells	NHEK-Epidermal_Keratinocytes	Class1	E127-H4K20me1.tagAlign.gz	22787191	180	0.242995	35	0.250468	1500	0.23976	1.01349	0.302091	0.07	0.03	0.22	40.1	0.596
H4K20me1	E128	LNG.NHLF	NHLF Lung Fibroblast Primary Cells	NHLF_Lung_Fibroblasts	Class1	E128-H4K20me1.tagAlign.gz	16120765	130	0.1839	35	0.191333	1500	0.180253	1.02023	0.329161	0.07	0.02	0.15	19.9	0.316
H4K20me1	E129	BONE.OSTEO	Osteoblast Primary Cells	Osteoblasts	Class1	E129-H4K20me1.tagAlign.gz	42058412	165	0.337002	35	0.339367	1500	0.329248	1.02355	0.76622	0.21	0.16	0.37	52	0.739
H4K5ac	E003	ESC.H1	H1 Cell Line	H1_Cell_Line	Class1	E003-H4K5ac.tagAlign.gz	39348757	110	0.371235	30	0.357906	1500	0.343688	1.08015	1.93747	0.12	0.08	0.26	41.9	0.612
H4K5ac	E008	ESC.H9	H9 Cell Line	H9_Cell_Line	Class1	E008-H4K5ac.tagAlign.gz	45000000	100	0.395621	30	0.391098	1500	0.372239	1.06282	1.2398	0.15	0.04	0.31	24.9	0.584
H4K5ac	E017	LNG.IMR90	IMR90 fetal lung fibroblasts Cell Line	IMR90_Cell_Line	Class1	E017-H4K5ac.tagAlign.gz	44304861	125	0.504709	45	0.446662	1500	0.381829	1.32182	1.89533	0.49	0.52	0.65	71.8	0.828
H4K8ac	E003	ESC.H1	H1 Cell Line	H1_Cell_Line	Class1	E003-H4K8ac.tagAlign.gz	11191465	130	0.169751	35	0.162725	1500	0.142745	1.18919	1.35167	0.39	0.38	0.57	26.3	0.519
H4K8ac	E004	ESDR.H1.BMP4.MESO	H1 BMP4 Derived Mesendoderm Cultured Cells	H1_BMP4_Derived_Mesendoderm_Cultured_Cells	Class1	E004-H4K8ac.tagAlign.gz	14257249	135	0.177784	35	0.176052	1500	0.166475	1.06793	1.18088	0.13	0.05	0.31	28.3	0.491
H4K8ac	E005	ESDR.H1.BMP4.TROP	H1 BMP4 Derived Trophoblast Cultured Cells	H1_BMP4_Derived_Trophoblast_Cultured_Cells	Class1	E005-H4K8ac.tagAlign.gz	33726766	140	0.375969	35	0.359232	1500	0.320714	1.17229	1.43452	0.28	0.25	0.47	69.1	0.798
H4K8ac	E006	ESDR.H1.MSC	H1 Derived Mesenchymal Stem Cells	H1_Derived_Mesenchymal_Stem_Cells	Class1	E006-H4K8ac.tagAlign.gz	45000000	120	0.249042	35	0.2379	1500	0.215137	1.1576	1.48952	0.43	0.29	0.5	62.1	0.777
H4K8ac	E007	ESDR.H1.NEUR.PROG	H1 Derived Neuronal Progenitor Cultured Cells	H1_Derived_Neuronal_Progenitor_Cultured_Cells	Class1	E007-H4K8ac.tagAlign.gz	29358575	130	0.113501	35	0.114459	1500	0.10289	1.10313	0.917191	0.33	0.04	0.43	18.7	0.477
H4K8ac	E008	ESC.H9	H9 Cell Line	H9_Cell_Line	Class1	E008-H4K8ac.tagAlign.gz	39336041	90	0.36754	30	0.361309	1500	0.341664	1.07573	1.31716	0.06	0.02	0.24	15.8	0.459
H4K8ac	E017	LNG.IMR90	IMR90 fetal lung fibroblasts Cell Line	IMR90_Cell_Line	Class1	E017-H4K8ac.tagAlign.gz	45000000	115	0.495326	45	0.454078	1500	0.377591	1.31181	1.53928	0.54	0.54	0.65	73.8	0.837
H4K91ac	E003	ESC.H1	H1 Cell Line	H1_Cell_Line	Class1	E003-H4K91ac.tagAlign.gz	44990544	100	0.398963	35	0.396644	1500	0.379622	1.05095	1.13619	0.09	0.03	0.28	44.4	0.687
H4K91ac	E005	ESDR.H1.BMP4.TROP	H1 BMP4 Derived Trophoblast Cultured Cells	H1_BMP4_Derived_Trophoblast_Cultured_Cells	Class1	E005-H4K91ac.tagAlign.gz	15985079	140	0.28607	40	0.258923	1500	0.214089	1.33622	1.60549	0.53	0.54	0.65	71.8	0.806
H4K91ac	E006	ESDR.H1.MSC	H1 Derived Mesenchymal Stem Cells	H1_Derived_Mesenchymal_Stem_Cells	Class1	E006-H4K91ac.tagAlign.gz	40721825	125	0.298907	35	0.289447	1500	0.264987	1.128	1.38674	0.25	0.19	0.46	56.6	0.772
H4K91ac	E007	ESDR.H1.NEUR.PROG	H1 Derived Neuronal Progenitor Cultured Cells	H1_Derived_Neuronal_Progenitor_Cultured_Cells	Class1	E007-H4K91ac.tagAlign.gz	41077622	135	0.12339	35	0.125144	1500	0.114766	1.07514	0.830929	0.31	0.03	0.41	23.9	0.556
H4K91ac	E008	ESC.H9	H9 Cell Line	H9_Cell_Line	Class1	E008-H4K91ac.tagAlign.gz	34189525	125	0.325513	30	0.330832	1500	0.317031	1.02676	0.614627	0.05	0.01	0.24	22.6	0.547
H4K91ac	E017	LNG.IMR90	IMR90 fetal lung fibroblasts Cell Line	IMR90_Cell_Line	Class1	E017-H4K91ac.tagAlign.gz	28251069	115	0.391256	45	0.357928	1500	0.303119	1.29077	1.60808	0.48	0.49	0.61	75.1	0.878
Input	E001	ESC.I3	ES-I3 Cell Line	ES-I3_Cell_Line	Core	E001-Input.tagAlign.gz	30000000	140	0.295848	35	0.295801	1500	0.290303	1.0191	1.00852	0.011	0.002	0.064
Input	E002	ESC.WA7	ES-WA7 Cell Line	ES-WA7_Cell_Line	Core	E002-Input.tagAlign.gz	10943655	180	0.152682	35	0.137467	1500	0.129823	1.17608	2.99043	0.191	0.132	0.336
Input	E003	ESC.H1	H1 Cell Line	H1_Cell_Line	Core	E003-Input.tagAlign.gz	30000000	95	0.292296	35	0.29194	1500	0.28418	1.02856	1.04589	0.017	0.006	0.065
Input	E004	ESDR.H1.BMP4.MESO	H1 BMP4 Derived Mesendoderm Cultured Cells	H1_BMP4_Derived_Mesendoderm_Cultured_Cells	Core	E004-Input.tagAlign.gz	30000000	120	0.297599	35	0.298244	1500	0.290871	1.02313	0.912595	0.029	0.005	0.157
Input	E005	ESDR.H1.BMP4.TROP	H1 BMP4 Derived Trophoblast Cultured Cells	H1_BMP4_Derived_Trophoblast_Cultured_Cells	Core	E005-Input.tagAlign.gz	30000000	85	0.29684	35	0.301023	1500	0.290728	1.02102	0.593684	0.022	0.005	0.13
Input	E006	ESDR.H1.MSC	H1 Derived Mesenchymal Stem Cells	H1_Derived_Mesenchymal_Stem_Cells	Core	E006-Input.tagAlign.gz	30000000	90	0.296724	35	0.302037	1500	0.288707	1.02777	0.601475	0.019	0.006	0.096
Input	E007	ESDR.H1.NEUR.PROG	H1 Derived Neuronal Progenitor Cultured Cells	H1_Derived_Neuronal_Progenitor_Cultured_Cells	Core	E007-Input.tagAlign.gz	30000000	120	0.293604	35	0.298931	1500	0.288004	1.01944	0.512467	0.013	0.01	0.08
Input	E008	ESC.H9	H9 Cell Line	H9_Cell_Line	Core	E008-Input.tagAlign.gz	30000000	135	0.292364	30	0.297055	1500	0.28791	1.01547	0.487105	0.01	0.008	0.052
Input	E009	ESDR.H9.NEUR.PROG	H9 Derived Neuronal Progenitor Cultured Cells	H9_Derived_Neuronal_Progenitor_Cultured_Cells	Core	E009-Input.tagAlign.gz	30000000	120	0.294145	35	0.295603	1500	0.290959	1.01095	0.685964	0.008	0.003	0.054
Input	E010	ESDR.H9.NEUR	H9 Derived Neuron Cultured Cells	H9_Derived_Neuron_Cultured_Cells	Core	E010-Input.tagAlign.gz	30000000	95	0.295899	35	0.297084	1500	0.290589	1.01827	0.81757	0.021	0.003	0.092
Input	E011	ESDR.CD184.ENDO	hESC Derived CD184+ Endoderm Cultured Cells	hESC_Derived_CD184+_Endoderm_Cultured_Cells	Core	E011-Input.tagAlign.gz	30000000	220	0.294499	35	0.299027	1500	0.2911	1.01168	0.428809	0.005	0.005	0.049
Input	E012	ESDR.CD56.ECTO	hESC Derived CD56+ Ectoderm Cultured Cells	hESC_Derived_CD56+_Ectoderm_Cultured_Cells	Core	E012-Input.tagAlign.gz	30000000	165	0.293929	35	0.297125	1500	0.29172	1.00757	0.40869	0.003	0.004	0.03
Input	E013	ESDR.CD56.MESO	hESC Derived CD56+ Mesoderm Cultured Cells	hESC_Derived_CD56+_Mesoderm_Cultured_Cells	Core	E013-Input.tagAlign.gz	30000000	215	0.29443	35	0.302443	1500	0.290013	1.01523	0.355301	0.005	0.006	0.041
Input	E014	ESC.HUES48	HUES48 Cell Line	HUES48_Cell_Line	Core	E014-Input.tagAlign.gz	30000000	150	0.29214	35	0.296749	1500	0.289606	1.00875	0.354692	0.005	0.004	0.034
Input	E015	ESC.HUES6	HUES6 Cell Line	HUES6_Cell_Line	Core	E015-Input.tagAlign.gz	30000000	135	0.293059	35	0.29745	1500	0.289186	1.01339	0.468653	0.018	0.005	0.066
Input	E016	ESC.HUES64	HUES64 Cell Line	HUES64_Cell_Line	Core	E016-Input.tagAlign.gz	30000000	170	0.294451	35	0.2982	1500	0.291023	1.01178	0.477725	0.011	0.004	0.056
Input	E017	LNG.IMR90	IMR90 fetal lung fibroblasts Cell Line	IMR90_Cell_Line	Core	E017-Input.tagAlign.gz	30000000	100	0.298264	35	0.3013	1500	0.289273	1.03108	0.747546	0.069	0.019	0.2
Input	E018	IPSC.15b	iPS-15b Cell Line	iPS-15b_Cell_Line	Core	E018-Input.tagAlign.gz	30000000	140	0.293416	35	0.299252	1500	0.289756	1.01263	0.385482	0.005	0.005	0.041
Input	E019	IPSC.18	iPS-18 Cell Line	iPS-18_Cell_Line	Core	E019-Input.tagAlign.gz	30000000	130	0.291905	35	0.29747	1500	0.289059	1.00985	0.338414	0.005	0.005	0.039
Input	E020	IPSC.20B	iPS-20b Cell Line	iPS-20b_Cell_Line	Core	E020-Input.tagAlign.gz	30000000	185	0.292263	35	0.296729	1500	0.28974	1.00871	0.36104	0.004	0.005	0.036
Input	E021	IPSC.DF.6.9	iPS DF 6.9 Cell Line	iPS_DF_6.9_Cell_Line	Core	E021-Input.tagAlign.gz	30000000	95	0.299698	35	0.304237	1500	0.289974	1.03354	0.681797	0.04	0.005	0.364
Input	E022	IPSC.DF.19.11	iPS DF 19.11 Cell Line	iPS_DF_19.11_Cell_Line	Core	E022-Input.tagAlign.gz	25608432	95	0.26472	35	0.260882	1500	0.251164	1.05397	1.39493	0.034	0.005	0.073
Input	E023	FAT.MSC.DR.ADIP	Mesenchymal Stem Cell Derived Adipocyte Cultured Cells	Mesenchymal_Stem_Cell_Derived_Adipocyte_Cultured_Cells	Core	E023-Input.tagAlign.gz	30000000	170	0.292546	35	0.29654	1500	0.289804	1.00946	0.407088	0.004	0.005	0.041
Input	E024	ESC.4STAR	ES-UCSF4 Cell Line	4star	Core	E024-Input.tagAlign.gz	30000000	155	0.322333	35	0.295375	1500	0.29193	1.10414	8.82576	0.011	0.001	0.087
Input	E025	FAT.ADIP.DR.MSC	Adipose Derived Mesenchymal Stem Cell Cultured Cells	Adipose_Derived_Mesenchymal_Stem_Cell_Cultured_Cells	Core	E025-Input.tagAlign.gz	30000000	165	0.292361	35	0.296218	1500	0.289827	1.00874	0.396473	0.004	0.004	0.037
Input	E026	STRM.MRW.MSC	Bone Marrow Derived Cultured Mesenchymal Stem Cells	Bone_Marrow_Derived_Mesenchymal_Stem_Cell_Cultured_Cells	Core	E026-Input.tagAlign.gz	30000000	145	0.292275	35	0.296883	1500	0.289777	1.00862	0.351476	0.012	0.006	0.066
Input	E027	BRST.MYO	Breast Myoepithelial Primary Cells	Breast_Myoepithelial_Cells	Core	E027-Input.tagAlign.gz	30000000	90	0.293413	35	0.294992	1500	0.288662	1.01646	0.750496	0.005	0.006	0.03
Input	E028	BRST.HMEC.35	Breast variant Human Mammary Epithelial Cells (vHMEC)	Breast_vHMEC	Core	E028-Input.tagAlign.gz	30000000	110	0.290844	35	0.294038	1500	0.28824	1.00903	0.449041	0.01	0.007	0.044
Input	E029	BLD.CD14.PC	Primary monocytes from peripheral blood	CD14_Primary_Cells	Core	E029-Input.tagAlign.gz	20538113	175	0.223617	35	0.23065	1500	0.220188	1.01557	0.327771	0.025	0.008	0.096
Input	E030	BLD.CD15.PC	Primary neutrophils from peripheral blood	CD15_Primary_Cells	Core	E030-Input.tagAlign.gz	27121937	200	0.276299	35	0.275405	1500	0.268138	1.03043	1.12294	0.005	0.006	0.042
Input	E031	BLD.CD19.CPC	Primary B cells from cord blood	CD19_Primary_Cells_Cord_BI	Core	E031-Input.tagAlign.gz	5082252	135	0.0681605	35	0.0728021	1500	0.0658389	1.03526	0.333407	0.072	0.009	0.132
Input	E032	BLD.CD19.PPC	Primary B cells from peripheral blood	CD19_Primary_Cells_Peripheral_UW	Core	E032-Input.tagAlign.gz	29763728	115	0.292922	35	0.298859	1500	0.291056	1.00641	0.239089	0.004	0.005	0.043
Input	E033	BLD.CD3.CPC	Primary T cells from cord blood	CD3_Primary_Cells_Cord_BI	Core	E033-Input.tagAlign.gz	6976206	135	0.0908442	40	0.095256	1500	0.0877906	1.03478	0.409031	0.069	0.009	0.18
Input	E034	BLD.CD3.PPC	Primary T cells from peripheral blood	CD3_Primary_Cells_Peripheral_UW	Core	E034-Input.tagAlign.gz	30000000	150	0.294115	35	0.298967	1500	0.291815	1.00788	0.321554	0.004	0.005	0.032
Input	E035	BLD.CD34.PC	Primary hematopoietic stem cells	CD34_Primary_Cells	Core	E035-Input.tagAlign.gz	8809704	115	0.112586	40	0.115983	1500	0.109422	1.02891	0.482233	0.06	0.008	0.172
Input	E036	BLD.CD34.CC	Primary hematopoietic stem cells short term culture	CD34_Cultured_Cells	Core	E036-Input.tagAlign.gz	27825398	130	0.278873	35	0.283457	1500	0.275384	1.01267	0.432147	0.005	0.005	0.038
Input	E037	BLD.CD4.MPC	Primary T helper memory cells from peripheral blood 2	CD4_Memory_Primary_Cells	Core	E037-Input.tagAlign.gz	30000000	200	0.292802	35	0.297566	1500	0.289948	1.00984	0.374656	0.005	0.006	0.043
Input	E038	BLD.CD4.NPC	Primary T helper naive cells from peripheral blood	CD4_Naive_Primary_Cells	Core	E038-Input.tagAlign.gz	30000000	215	0.294249	35	0.299689	1500	0.290518	1.01284	0.406774	0.009	0.006	0.066
Input	E039	BLD.CD4.CD25M.CD45RA.NPC	Primary T helper naive cells from peripheral blood	CD4+_CD25-_CD45RA+_Naive_Primary_Cells	Core	E039-Input.tagAlign.gz	30000000	220	0.291488	35	0.296769	1500	0.2889	1.00896	0.328893	0.005	0.005	0.036
Input	E040	BLD.CD4.CD25M.CD45RO.MPC	Primary T helper memory cells from peripheral blood 1	CD4+_CD25-_CD45RO+_Memory_Primary_Cells	Core	E040-Input.tagAlign.gz	30000000	230	0.291306	35	0.301295	1500	0.288438	1.00994	0.22308	0.007	0.008	0.038
Input	E041	BLD.CD4.CD25M.IL17M.PL.TPC	Primary T helper cells PMA-I stimulated	CD4+_CD25-_IL17-_PMA-Ionomycin_stimulated_MACS_purified_Th_Primary_Cells	Core	E041-Input.tagAlign.gz	30000000	220	0.292054	35	0.297021	1500	0.289325	1.00944	0.354672	0.004	0.006	0.035
Input	E042	BLD.CD4.CD25M.IL17P.PL.TPC	Primary T helper 17 cells PMA-I stimulated	CD4+_CD25-_IL17+_PMA-Ionomcyin_stimulated_Th17_Primary_Cells	Core	E042-Input.tagAlign.gz	30000000	180	0.292212	35	0.296816	1500	0.289409	1.00968	0.378447	0.006	0.005	0.044
Input	E043	BLD.CD4.CD25M.TPC	Primary T helper cells from peripheral blood	CD4+_CD25-_Th_Primary_Cells	Core	E043-Input.tagAlign.gz	30000000	180	0.292014	35	0.297245	1500	0.289409	1.009	0.332447	0.004	0.006	0.032
Input	E044	BLD.CD4.CD25.CD127M.TREGPC	Primary T regulatory cells from peripheral blood	CD4+_CD25+_CD127-_Treg_Primary_Cells	Core	E044-Input.tagAlign.gz	30000000	195	0.291691	35	0.297048	1500	0.289595	1.00724	0.2812	0.004	0.006	0.029
Input	E045	BLD.CD4.CD25I.CD127.TMEMPC	Primary T cells effector/memory enriched from peripheral blood	CD4+_CD25int_CD127+_Tmem_Primary_Cells	Core	E045-Input.tagAlign.gz	30000000	155	0.291765	35	0.297496	1500	0.28918	1.00894	0.310839	0.004	0.006	0.029
Input	E046	BLD.CD56.PC	Primary Natural Killer cells from peripheral blood	CD56_Primary_Cells	Core	E046-Input.tagAlign.gz	25203628	185	0.261623	35	0.267917	1500	0.257001	1.01798	0.423432	0.019	0.007	0.092
Input	E047	BLD.CD8.NPC	Primary T killer naive cells from peripheral blood	CD8_Naive_Primary_Cells	Core	E047-Input.tagAlign.gz	30000000	240	0.294345	35	0.298971	1500	0.290575	1.01297	0.449062	0.012	0.006	0.072
Input	E048	BLD.CD8.MPC	Primary T killer memory cells from peripheral blood	CD8_Memory_Primary_Cells	Core	E048-Input.tagAlign.gz	30000000	225	0.294016	35	0.300098	1500	0.290463	1.01223	0.368708	0.007	0.006	0.06
Input	E049	STRM.CHON.MRW.DR.MSC	Mesenchymal Stem Cell Derived Chondrocyte Cultured Cells	Chondrocytes_from_Bone_Marrow_Derived_Mesenchymal_Stem_Cell_Cultured_Cells	Core	E049-Input.tagAlign.gz	30000000	175	0.292105	35	0.296112	1500	0.289701	1.0083	0.375014	0.007	0.005	0.051
Input	E050	BLD.MOB.CD34.PC.F	Primary hematopoietic stem cells G-CSF-mobilized Female	Mobilized_CD34_Primary_Cells_Female	Core	E050-Input.tagAlign.gz	30000000	145	0.291381	35	0.294456	1500	0.289033	1.00812	0.432888	0.004	0.005	0.03
Input	E051	BLD.MOB.CD34.PC.M	Primary hematopoietic stem cells G-CSF-mobilized Male	Mobilized_CD34_Primary_Cells_Male	Core	E051-Input.tagAlign.gz	29874758	205	0.291703	35	0.297228	1500	0.289963	1.006	0.239552	0.004	0.004	0.035
Input	E052	MUS.SAT	Muscle Satellite Cultured Cells	Muscle_Satellite_Cultured_Cells	Core	E052-Input.tagAlign.gz	30000000	100	0.292781	35	0.298354	1500	0.289755	1.01044	0.351843	0.018	0.004	0.079
Input	E053	BRN.CRTX.DR.NRSPHR	Cortex derived primary cultured neurospheres	Neurosphere_Cultured_Cells_Cortex_Derived	Core	E053-Input.tagAlign.gz	20350092	90	0.218903	35	0.21976	1500	0.216006	1.01341	0.771592	0.019	0.004	0.068
Input	E054	BRN.GANGEM.DR.NRSPHR	Ganglion Eminence derived primary cultured neurospheres	Neurosphere_Cultured_Cells_Ganglionic_Eminence_Derived	Core	E054-Input.tagAlign.gz	21500129	100	0.228591	35	0.228832	1500	0.224871	1.01655	0.939298	0.02	0.004	0.06
Input	E055	SKIN.PEN.FRSK.FIB.01	Foreskin Fibroblast Primary Cells skin01	Penis_Foreskin_Fibroblast_Primary_Cells_skin01	Core	E055-Input.tagAlign.gz	30000000	185	0.29512	35	0.294554	1500	0.291944	1.01088	1.21671	0.001	0	0.03
Input	E056	SKIN.PEN.FRSK.FIB.02	Foreskin Fibroblast Primary Cells skin02	Penis_Foreskin_Fibroblast_Primary_Cells_skin02	Core	E056-Input.tagAlign.gz	30000000	160	0.293919	35	0.293273	1500	0.29097	1.01014	1.28088	0.001	0.001	0.026
Input	E057	SKIN.PEN.FRSK.KER.02	Foreskin Keratinocyte Primary Cells skin02	Penis_Foreskin_Keratinocyte_Primary_Cells_skin02	Core	E057-Input.tagAlign.gz	15483267	120	0.177276	35	0.177667	1500	0.175471	1.01029	0.822159	0.036	0.001	0.079
Input	E058	SKIN.PEN.FRSK.KER.03	Foreskin Keratinocyte Primary Cells skin03	Penis_Foreskin_Keratinocyte_Primary_Cells_skin03	Core	E058-Input.tagAlign.gz	30000000	155	0.316808	35	0.294663	1500	0.29102	1.08861	7.07969	0.013	0.002	0.094
Input	E059	SKIN.PEN.FRSK.MEL.01	Foreskin Melanocyte Primary Cells skin01	Penis_Foreskin_Melanocyte_Primary_Cells_skin01	Core	E059-Input.tagAlign.gz	15680694	110	0.178757	35	0.178796	1500	0.176804	1.01105	0.980398	0.039	0.001	0.081
Input	E061	SKIN.PEN.FRSK.MEL.03	Foreskin Melanocyte Primary Cells skin03	Penis_Foreskin_Melanocyte_Primary_Cells_skin03	Core	E061-Input.tagAlign.gz	30000000	135	0.310264	35	0.295925	1500	0.29163	1.0639	4.33936	0.02	0.002	0.116
Input	E062	BLD.PER.MONUC.PC	Primary mononuclear cells from peripheral blood	Peripheral_Blood_Mononuclear_Primary_Cells	Core	E062-Input.tagAlign.gz	30000000	115	0.292654	35	0.295073	1500	0.288681	1.01376	0.621513	0.009	0.006	0.056
Input	E063	FAT.ADIP.NUC	Adipose Nuclei	Adipose_Nuclei	Core	E063-Input.tagAlign.gz	30000000	140	0.291633	35	0.296376	1500	0.28867	1.01026	0.384521	0.006	0.006	0.036
Input	E065	HRT.AOR	Aorta	Aorta	Core	E065-Input.tagAlign.gz	16628788	130	0.2102	35	0.208802	1500	0.193979	1.08362	1.09432	0.166	0.072	0.428
Input	E066	LIV.ADLT	Liver	Adult_Liver	Core	E066-Input.tagAlign.gz	30000000	155	0.29379	35	0.298967	1500	0.288762	1.01741	0.492748	0.008	0.007	0.052
Input	E067	BRN.ANG.GYR	Brain Angular Gyrus	Brain_Angular_Gyrus	Core	E067-Input.tagAlign.gz	30000000	220	0.29451	35	0.299507	1500	0.291197	1.01138	0.39865	0.005	0.006	0.045
Input	E068	BRN.ANT.CAUD	Brain Anterior Caudate	Brain_Anterior_Caudate	Core	E068-Input.tagAlign.gz	30000000	95	0.292338	35	0.298113	1500	0.289832	1.00865	0.302663	0.005	0.006	0.032
Input	E069	BRN.CING.GYR	Brain Cingulate Gyrus	Brain_Cingulate_Gyrus	Core	E069-Input.tagAlign.gz	30000000	170	0.292448	35	0.297255	1500	0.289903	1.00878	0.346242	0.005	0.006	0.034
Input	E070	BRN.GRM.MTRX	Brain Germinal Matrix	Brain_Germinal_Matrix	Core	E070-Input.tagAlign.gz	13500539	140	0.161796	35	0.158681	1500	0.156857	1.03149	2.70679	0.038	0.001	0.127
Input	E071	BRN.HIPP.MID	Brain Hippocampus Middle	Brain_Hippocampus_Middle	Core	E071-Input.tagAlign.gz	30000000	225	0.293351	35	0.300052	1500	0.290482	1.00988	0.299728	0.005	0.006	0.035
Input	E072	BRN.INF.TMP	Brain Inferior Temporal Lobe	Brain_Inferior_Temporal_Lobe	Core	E072-Input.tagAlign.gz	30000000	165	0.292496	35	0.297729	1500	0.28979	1.00934	0.340832	0.005	0.006	0.035
Input	E073	BRN.DL.PRFRNTL.CRTX	Brain_Dorsolateral_Prefrontal_Cortex	Brain_Mid_Frontal_Lobe	Core	E073-Input.tagAlign.gz	30000000	160	0.292213	35	0.297026	1500	0.28982	1.00826	0.332106	0.004	0.006	0.031
Input	E074	BRN.SUB.NIG	Brain Substantia Nigra	Brain_Substantia_Nigra	Core	E074-Input.tagAlign.gz	30000000	95	0.292274	35	0.298372	1500	0.289867	1.00831	0.283075	0.005	0.006	0.031
Input	E075	GI.CLN.MUC	Colonic Mucosa	Colonic_Mucosa	Core	E075-Input.tagAlign.gz	17597438	95	0.196359	35	0.201347	1500	0.19434	1.01039	0.288125	0.023	0.005	0.068
Input	E076	GI.CLN.SM.MUS	Colon Smooth Muscle	Colon_Smooth_Muscle	Core	E076-Input.tagAlign.gz	30000000	230	0.292367	35	0.295475	1500	0.289961	1.0083	0.436471	0.003	0.004	0.035
Input	E077	GI.DUO.MUC	Duodenum Mucosa	Duodenum_Mucosa	Core	E077-Input.tagAlign.gz	30000000	100	0.294752	35	0.299118	1500	0.292392	1.00807	0.350867	0.004	0.005	0.032
Input	E078	GI.DUO.SM.MUS	Duodenum Smooth Muscle	Duodenum_Smooth_Muscle	Core	E078-Input.tagAlign.gz	30000000	230	0.295195	35	0.298407	1500	0.29224	1.01011	0.479148	0.004	0.005	0.048
Input	E079	GI.ESO	Esophagus	Esophagus	Core	E079-Input.tagAlign.gz	30000000	145	0.301261	35	0.302816	1500	0.291671	1.03288	0.860426	0.017	0.006	0.141
Input	E080	ADRL.GLND.FET	Fetal Adrenal Gland	Fetal_Adrenal_Gland	Core	E080-Input.tagAlign.gz	25471647	140	0.261045	35	0.266849	1500	0.259289	1.00677	0.232244	0.005	0.005	0.032
Input	E081	BRN.FET.M	Fetal Brain Male	Fetal_Brain_Male	Core	E081-Input.tagAlign.gz	15986718	220	0.182397	35	0.188512	1500	0.179951	1.01359	0.285737	0.043	0.007	0.098
Input	E082	BRN.FET.F	Fetal Brain Female	Fetal_Brain_Female	Core	E082-Input.tagAlign.gz	28368823	125	0.282441	35	0.280668	1500	0.277402	1.01817	1.54282	0.004	0.001	0.043
Input	E083	HRT.FET	Fetal Heart	Fetal_Heart	Core	E083-Input.tagAlign.gz	21203977	195	0.228644	35	0.233586	1500	0.219089	1.04361	0.659065	0.024	0.008	0.098
Input	E084	GI.L.INT.FET	Fetal Intestine Large	Fetal_Intestine_Large	Core	E084-Input.tagAlign.gz	30000000	175	0.296443	35	0.298777	1500	0.293266	1.01083	0.576546	0.009	0.002	0.084
Input	E085	GI.S.INT.FET	Fetal Intestine Small	Fetal_Intestine_Small	Core	E085-Input.tagAlign.gz	30000000	155	0.296092	35	0.298558	1500	0.293506	1.00881	0.511854	0.004	0.002	0.057
Input	E086	KID.FET	Fetal Kidney	Fetal_Kidney	Core	E086-Input.tagAlign.gz	18548118	195	0.205271	35	0.209883	1500	0.20236	1.01438	0.386898	0.035	0.006	0.092
Input	E087	PANC.ISLT	Pancreatic Islets	Pancreatic_Islets	Core	E087-Input.tagAlign.gz	10225696	160	0.129627	35	0.137976	1500	0.125761	1.03074	0.316488	0.094	0.017	0.244
Input	E088	LNG.FET	Fetal Lung	Fetal_Lung	Core	E088-Input.tagAlign.gz	30000000	150	0.292502	35	0.297261	1500	0.289313	1.01102	0.401196	0.005	0.006	0.036
Input	E089	MUS.TRNK.FET	Fetal Muscle Trunk	Fetal_Muscle_Trunk	Core	E089-Input.tagAlign.gz	18197787	190	0.19832	35	0.203549	1500	0.196509	1.00921	0.257196	0.043	0.006	0.076
Input	E090	MUS.LEG.FET	Fetal Muscle Leg	Fetal_Muscle_Leg	Core	E090-Input.tagAlign.gz	23415690	100	0.245469	35	0.249719	1500	0.243834	1.0067	0.277763	0.006	0.003	0.044
Input	E091	PLCNT.FET	Placenta	Fetal_Placenta	Core	E091-Input.tagAlign.gz	18263539	140	0.201682	35	0.207435	1500	0.199745	1.0097	0.251847	0.018	0.006	0.061
Input	E092	GI.STMC.FET	Fetal Stomach	Fetal_Stomach	Core	E092-Input.tagAlign.gz	29322147	90	0.288763	35	0.293022	1500	0.287093	1.00582	0.28174	0.003	0.003	0.029
Input	E093	THYM.FET	Fetal Thymus	Fetal_Thymus	Core	E093-Input.tagAlign.gz	30000000	90	0.294406	35	0.297952	1500	0.292764	1.00561	0.316437	0.003	0.003	0.036
Input	E094	GI.STMC.GAST	Gastric	Gastric	Core	E094-Input.tagAlign.gz	30000000	135	0.299208	35	0.298163	1500	0.292374	1.02337	1.18037	0.01	0.003	0.114
Input	E095	HRT.VENT.L	Left Ventricle	Left_Ventricle	Core	E095-Input.tagAlign.gz	30000000	135	0.30606	35	0.307326	1500	0.294582	1.03896	0.900712	0.061	0.007	0.295
Input	E096	LNG	Lung	Lung	Core	E096-Input.tagAlign.gz	30000000	140	0.294503	35	0.298901	1500	0.286957	1.0263	0.631824	0.025	0.006	0.134
Input	E097	OVRY	Ovary	Ovary	Core	E097-Input.tagAlign.gz	30000000	110	0.315419	35	0.311916	1500	0.294144	1.07233	1.19711	0.121	0.088	0.257
Input	E098	PANC	Pancreas	Pancreas	Core	E098-Input.tagAlign.gz	30000000	125	0.300086	35	0.300861	1500	0.292102	1.02733	0.911485	0.016	0.005	0.124
Input	E099	PLCNT.AMN	Placenta Amnion	Placenta_Amnion	Core	E099-Input.tagAlign.gz	25392183	105	0.2612	35	0.262731	1500	0.258753	1.00945	0.615022	0.004	0.003	0.033
Input	E100	MUS.PSOAS	Psoas Muscle	Psoas_Muscle	Core	E100-Input.tagAlign.gz	30000000	105	0.311043	35	0.308135	1500	0.294746	1.05529	1.21724	0.078	0.006	0.35
Input	E101	GI.RECT.MUC.29	Rectal Mucosa Donor 29	Rectal_Mucosa.Donor_29	Core	E101-Input.tagAlign.gz	30000000	105	0.293716	35	0.298609	1500	0.291004	1.00932	0.356548	0.004	0.005	0.034
Input	E102	GI.RECT.MUC.31	Rectal Mucosa Donor 31	Rectal_Mucosa.Donor_31	Core	E102-Input.tagAlign.gz	30000000	90	0.293463	35	0.297083	1500	0.290092	1.01162	0.482196	0.005	0.004	0.038
Input	E103	GI.RECT.SM.MUS	Rectal Smooth Muscle	Rectal_Smooth_Muscle	Core	E103-Input.tagAlign.gz	26466701	90	0.267819	35	0.27322	1500	0.264969	1.01076	0.345395	0.007	0.005	0.042
Input	E104	HRT.ATR.R	Right Atrium	Right_Atrium	Core	E104-Input.tagAlign.gz	21667490	140	0.243588	35	0.246184	1500	0.233443	1.04346	0.796232	0.095	0.014	0.284
Input	E105	HRT.VNT.R	Right Ventricle	Right_Ventricle	Core	E105-Input.tagAlign.gz	30000000	120	0.304712	35	0.306763	1500	0.292739	1.0409	0.853765	0.006	0.007	0.04
Input	E106	GI.CLN.SIG	Sigmoid Colon	Sigmoid_Colon	Core	E106-Input.tagAlign.gz	30000000	120	0.298147	35	0.297757	1500	0.290604	1.02595	1.05455	0.023	0.004	0.159
Input	E107	MUS.SKLT.M	Skeletal Muscle Male	Skeletal_Muscle_Male	Core	E107-Input.tagAlign.gz	26846263	95	0.276425	35	0.282085	1500	0.27108	1.01972	0.485703	0.016	0.008	0.095
Input	E108	MUS.SKLT.F	Skeletal Muscle Female	Skeletal_Muscle_Female	Core	E108-Input.tagAlign.gz	30000000	90	0.293919	35	0.298078	1500	0.291292	1.00902	0.38704	0.004	0.004	0.036
Input	E109	GI.S.INT	Small Intestine	Small_Intestine	Core	E109-Input.tagAlign.gz	30000000	120	0.301952	35	0.303839	1500	0.291822	1.03471	0.84298	0.035	0.007	0.167
Input	E110	GI.STMC.MUC	Stomach Mucosa	Stomach_Mucosa	Core	E110-Input.tagAlign.gz	30000000	220	0.294683	35	0.298575	1500	0.29177	1.00998	0.428003	0.005	0.005	0.052
Input	E111	GI.STMC.MUS	Stomach Smooth Muscle	Stomach_Smooth_Muscle	Core	E111-Input.tagAlign.gz	23248973	100	0.254015	35	0.258558	1500	0.245765	1.03357	0.644896	0.039	0.008	0.227
Input	E112	THYM	Thymus	Thymus	Core	E112-Input.tagAlign.gz	13609638	140	0.160413	35	0.162345	1500	0.155273	1.0331	0.726756	0.043	0.007	0.129
Input	E113	SPLN	Spleen	Spleen	Core	E113-Input.tagAlign.gz	28839487	150	0.28768	35	0.291723	1500	0.282899	1.0169	0.541814	0.006	0.006	0.052
Input	E114	LNG.A549.ETOH002.CNCR	A549 EtOH 0.02pct Lung Carcinoma Cell Line	A549_EtOH_0.02pct_Lung_Carcinoma	Core	E114-Input.tagAlign.gz	30000000	200	0.298708	35	0.299837	1500	0.295744	1.01002	0.724142	0.01	0.002	0.105
Input	E115	BLD.DND41.CNCR	Dnd41 TCell Leukemia Cell Line	Dnd41_TCell_Leukemia	Core	E115-Input.tagAlign.gz	30000000	145	0.298495	35	0.300211	1500	0.293421	1.01729	0.747286	0.012	0.004	0.082
Input	E116	BLD.GM12878	GM12878 Lymphoblastoid Cell Line	GM12878_Lymphoblastoid	Core	E116-Input.tagAlign.gz	12554606	120	0.149332	35	0.15636	1500	0.147765	1.0106	0.182263	0.062	0.007	0.113
Input	E117	CRVX.HELAS3.CNCR	HeLa-S3 Cervical Carcinoma Cell Line	HeLa-S3_Cervical_Carcinoma	Core	E117-Input.tagAlign.gz	30000000	145	0.29946	35	0.300311	1500	0.295344	1.01394	0.828532	0.009	0.004	0.109
Input	E118	LIV.HEPG2.CNCR	HepG2 Hepatocellular Carcinoma Cell Line	HepG2_Hepatocellular_Carcinoma	Core	E118-Input.tagAlign.gz	10748827	185	0.138193	35	0.144943	1500	0.135335	1.02112	0.297444	0.078	0.015	0.228
Input	E119	BRST.HMEC	HMEC Mammary Epithelial Primary Cells	HMEC_Mammary_Epithelial	Core	E119-Input.tagAlign.gz	17887776	95	0.199894	35	0.206539	1500	0.197011	1.01463	0.302617	0.031	0.009	0.074
Input	E120	MUS.HSMM	HSMM Skeletal Muscle Myoblasts Cell Line	HSMM_Skeletal_Muscle_Myoblasts	Core	E120-Input.tagAlign.gz	17075015	130	0.197211	35	0.202503	1500	0.191571	1.02944	0.515933	0.051	0.009	0.161
Input	E121	MUS.HSMMT	HSMM cell derived Skeletal Muscle Myotubes Cell Line	HSMMtube_Skeletal_Muscle_Myotubes_Derived_from_HSMM	Core	E121-Input.tagAlign.gz	30000000	125	0.299628	35	0.299505	1500	0.293215	1.02187	1.01968	0.019	0.005	0.114
Input	E122	VAS.HUVEC	HUVEC Umbilical Vein Endothelial Cells Cell Line	HUVEC_Umbilical_Vein_Endothelial_Cells	Core	E122-Input.tagAlign.gz	21260338	185	0.231304	35	0.238114	1500	0.226664	1.02047	0.405275	0.052	0.012	0.14
Input	E123	BLD.K562.CNCR	K562 Leukemia Cell Line	K562_Leukemia	Core	E123-Input.tagAlign.gz	17695407	140	0.20235	35	0.208117	1500	0.200288	1.0103	0.263376	0.045	0.013	0.175
Input	E124	BLD.CD14.MONO	Monocytes-CD14+ RO01746 Cell Line	Monocytes-CD14+_RO01746	Core	E124-Input.tagAlign.gz	30000000	145	0.294367	35	0.297525	1500	0.291212	1.01083	0.499775	0.004	0.005	0.035
Input	E125	BRN.NHA	NH-A Astrocytes Cell Line	NH-A_Astrocytes	Core	E125-Input.tagAlign.gz	30000000	180	0.297807	35	0.298592	1500	0.293101	1.01605	0.857049	0.006	0.005	0.066
Input	E126	SKIN.NHDFAD	NHDF-Ad Adult Dermal Fibroblast Primary Cells	NHDF-Ad_Adult_Dermal_Fibroblasts	Core	E126-Input.tagAlign.gz	16806474	135	0.201118	35	0.199039	1500	0.188491	1.06699	1.19704	0.055	0.011	0.153
Input	E127	SKIN.NHEK	NHEK-Epidermal Keratinocyte Primary Cells	NHEK-Epidermal_Keratinocytes	Core	E127-Input.tagAlign.gz	20364549	135	0.221362	35	0.228766	1500	0.218782	1.01179	0.258462	0.019	0.01	0.065
Input	E128	LNG.NHLF	NHLF Lung Fibroblast Primary Cells	NHLF_Lung_Fibroblasts	Core	E128-Input.tagAlign.gz	12868984	205	0.153119	35	0.15962	1500	0.151086	1.01346	0.23821	0.062	0.008	0.13
Input	E129	BONE.OSTEO	Osteoblast Primary Cells	Osteoblasts	Core	E129-Input.tagAlign.gz	30000000	105	0.294962	35	0.297741	1500	0.291648	1.01137	0.543952	0.006	0.005	0.06

## Sheet: Unconsolidated_Release9_QC
LAB	GROUP	E-Mnemonic	CELL TYPE / TISSUE	MARK	DONOR	FILENAME	CONTROL FILE NAME	NREADS (36 bp mappability filtered)	FRAGLEN	FCC	READLEN	RCC	MINLEN	MINCC	NSC (Signal to noise)	RSC (Phantom Peak)
BI			Adipose_Derived_Mesenchymal_Stem_Cell_Cultured_Cells	H3K27me3	1	BI.Adipose_Derived_Mesenchymal_Stem_Cell_Cultured_Cells.H3K27me3.1.filt.tagAlign.gz	BI.Adipose_Derived_Mesenchymal_Stem_Cell_Cultured_Cells.Input.1.filt.tagAlign.gz	27366027	175	0.286089	35	0.28849	1500	0.28088	1.01854	0.684466
BI			Adipose_Derived_Mesenchymal_Stem_Cell_Cultured_Cells	H3K36me3	1	BI.Adipose_Derived_Mesenchymal_Stem_Cell_Cultured_Cells.H3K36me3.1.filt.tagAlign.gz	BI.Adipose_Derived_Mesenchymal_Stem_Cell_Cultured_Cells.Input.1.filt.tagAlign.gz	32495141	160	0.339931	35	0.34077	1500	0.327655	1.03747	0.936034
BI			Adipose_Derived_Mesenchymal_Stem_Cell_Cultured_Cells	H3K4me1	1	BI.Adipose_Derived_Mesenchymal_Stem_Cell_Cultured_Cells.H3K4me1.1.filt.tagAlign.gz	BI.Adipose_Derived_Mesenchymal_Stem_Cell_Cultured_Cells.Input.1.filt.tagAlign.gz	22599881	160	0.312722	35	0.301387	1500	0.258347	1.21047	1.26337
BI			Adipose_Derived_Mesenchymal_Stem_Cell_Cultured_Cells	H3K4me3	1	BI.Adipose_Derived_Mesenchymal_Stem_Cell_Cultured_Cells.H3K4me3.1.filt.tagAlign.gz	BI.Adipose_Derived_Mesenchymal_Stem_Cell_Cultured_Cells.Input.1.filt.tagAlign.gz	23313984	180	0.461308	35	0.432501	1500	0.299454	1.5405	1.21652
BI			Adipose_Derived_Mesenchymal_Stem_Cell_Cultured_Cells	H3K9me3	1	BI.Adipose_Derived_Mesenchymal_Stem_Cell_Cultured_Cells.H3K9me3.1.filt.tagAlign.gz	BI.Adipose_Derived_Mesenchymal_Stem_Cell_Cultured_Cells.Input.1.filt.tagAlign.gz	27594086	185	0.285372	35	0.290929	1500	0.27809	1.02618	0.56719
BI			Adipose_Derived_Mesenchymal_Stem_Cell_Cultured_Cells	Input	1	BI.Adipose_Derived_Mesenchymal_Stem_Cell_Cultured_Cells.Input.1.filt.tagAlign.gz	BI.Adipose_Derived_Mesenchymal_Stem_Cell_Cultured_Cells.Input.1.filt.tagAlign.gz	30421018	165	0.299684	35	0.301614	1500	0.294359	1.01809	0.733874
BI			Adipose_Derived_Mesenchymal_Stem_Cell_Cultured_Cells	H3K9ac	1.2	BI.Adipose_Derived_Mesenchymal_Stem_Cell_Cultured_Cells.H3K9ac.1.2.filt.tagAlign.gz	BI.Adipose_Derived_Mesenchymal_Stem_Cell_Cultured_Cells.Input.1.filt.tagAlign.gz	31508429	215	0.447768	35	0.413849	1500	0.331635	1.35018	1.41258
BI			Adipose_Derived_Mesenchymal_Stem_Cell_Cultured_Cells	H3K9ac	1.3	BI.Adipose_Derived_Mesenchymal_Stem_Cell_Cultured_Cells.H3K9ac.1.3.filt.tagAlign.gz	BI.Adipose_Derived_Mesenchymal_Stem_Cell_Cultured_Cells.Input.1.filt.tagAlign.gz	26902412	200	0.491254	40	0.4361	1500	0.312395	1.57254	1.44586
BI			Adipose_Derived_Mesenchymal_Stem_Cell_Cultured_Cells	H3K27me3	92	BI.Adipose_Derived_Mesenchymal_Stem_Cell_Cultured_Cells.H3K27me3.92.filt.tagAlign.gz	BI.Adipose_Derived_Mesenchymal_Stem_Cell_Cultured_Cells.Input.92.filt.tagAlign.gz	25759593	185	0.294502	35	0.289952	1500	0.280078	1.0515	1.46074
BI			Adipose_Derived_Mesenchymal_Stem_Cell_Cultured_Cells	H3K36me3	92	BI.Adipose_Derived_Mesenchymal_Stem_Cell_Cultured_Cells.H3K36me3.92.filt.tagAlign.gz	BI.Adipose_Derived_Mesenchymal_Stem_Cell_Cultured_Cells.Input.92.filt.tagAlign.gz	32086243	190	0.370078	35	0.370769	1500	0.349919	1.05761	0.96685
BI			Adipose_Derived_Mesenchymal_Stem_Cell_Cultured_Cells	H3K4me1	92	BI.Adipose_Derived_Mesenchymal_Stem_Cell_Cultured_Cells.H3K4me1.92.filt.tagAlign.gz	BI.Adipose_Derived_Mesenchymal_Stem_Cell_Cultured_Cells.Input.92.filt.tagAlign.gz	32317875	180	0.374764	35	0.364172	1500	0.331363	1.13098	1.32285
BI			Adipose_Derived_Mesenchymal_Stem_Cell_Cultured_Cells	H3K4me3	92	BI.Adipose_Derived_Mesenchymal_Stem_Cell_Cultured_Cells.H3K4me3.92.filt.tagAlign.gz	BI.Adipose_Derived_Mesenchymal_Stem_Cell_Cultured_Cells.Input.92.filt.tagAlign.gz	28842231	200	0.501815	35	0.466087	1500	0.325419	1.54206	1.25399
BI			Adipose_Derived_Mesenchymal_Stem_Cell_Cultured_Cells	H3K9ac	92	BI.Adipose_Derived_Mesenchymal_Stem_Cell_Cultured_Cells.H3K9ac.92.filt.tagAlign.gz	BI.Adipose_Derived_Mesenchymal_Stem_Cell_Cultured_Cells.Input.92.filt.tagAlign.gz	30357428	190	0.401104	35	0.377188	1500	0.325239	1.23326	1.46037
BI			Adipose_Derived_Mesenchymal_Stem_Cell_Cultured_Cells	H3K9me3	92	BI.Adipose_Derived_Mesenchymal_Stem_Cell_Cultured_Cells.H3K9me3.92.filt.tagAlign.gz	BI.Adipose_Derived_Mesenchymal_Stem_Cell_Cultured_Cells.Input.92.filt.tagAlign.gz	24381805	170	0.270157	35	0.279491	1500	0.258673	1.0444	0.55167
BI			Adipose_Derived_Mesenchymal_Stem_Cell_Cultured_Cells	Input	92	BI.Adipose_Derived_Mesenchymal_Stem_Cell_Cultured_Cells.Input.92.filt.tagAlign.gz	BI.Adipose_Derived_Mesenchymal_Stem_Cell_Cultured_Cells.Input.92.filt.tagAlign.gz	36749701	105	0.336985	35	0.341393	1500	0.334218	1.00828	0.385639
BI			Adipose_Derived_Mesenchymal_Stem_Cell_Cultured_Cells	H3K36me3	93	BI.Adipose_Derived_Mesenchymal_Stem_Cell_Cultured_Cells.H3K36me3.93.filt.tagAlign.gz	BI.Adipose_Derived_Mesenchymal_Stem_Cell_Cultured_Cells.Input.93.filt.tagAlign.gz	20049479	220	0.241456	35	0.238645	1500	0.228004	1.059	1.26418
BI			Adipose_Derived_Mesenchymal_Stem_Cell_Cultured_Cells	H3K4me1	93	BI.Adipose_Derived_Mesenchymal_Stem_Cell_Cultured_Cells.H3K4me1.93.filt.tagAlign.gz	BI.Adipose_Derived_Mesenchymal_Stem_Cell_Cultured_Cells.Input.93.filt.tagAlign.gz	27482368	205	0.324679	35	0.3142	1500	0.28986	1.12013	1.43053
BI			Adipose_Derived_Mesenchymal_Stem_Cell_Cultured_Cells	H3K4me3	93	BI.Adipose_Derived_Mesenchymal_Stem_Cell_Cultured_Cells.H3K4me3.93.filt.tagAlign.gz	BI.Adipose_Derived_Mesenchymal_Stem_Cell_Cultured_Cells.Input.93.filt.tagAlign.gz	26476479	190	0.33181	35	0.324885	1500	0.281173	1.18009	1.15845
BI			Adipose_Derived_Mesenchymal_Stem_Cell_Cultured_Cells	H3K9ac	93	BI.Adipose_Derived_Mesenchymal_Stem_Cell_Cultured_Cells.H3K9ac.93.filt.tagAlign.gz	BI.Adipose_Derived_Mesenchymal_Stem_Cell_Cultured_Cells.Input.93.filt.tagAlign.gz	22520200	220	0.29014	35	0.274663	1500	0.250567	1.15793	1.6423
BI			Adipose_Derived_Mesenchymal_Stem_Cell_Cultured_Cells	H3K9me3	93	BI.Adipose_Derived_Mesenchymal_Stem_Cell_Cultured_Cells.H3K9me3.93.filt.tagAlign.gz	BI.Adipose_Derived_Mesenchymal_Stem_Cell_Cultured_Cells.Input.93.filt.tagAlign.gz	26461762	180	0.284998	35	0.292931	1500	0.273597	1.04167	0.589673
BI			Adipose_Derived_Mesenchymal_Stem_Cell_Cultured_Cells	Input	93	BI.Adipose_Derived_Mesenchymal_Stem_Cell_Cultured_Cells.Input.93.filt.tagAlign.gz	BI.Adipose_Derived_Mesenchymal_Stem_Cell_Cultured_Cells.Input.93.filt.tagAlign.gz	34469561	180	0.323593	35	0.327087	1500	0.320025	1.01115	0.50526
BI			Adipose_Nuclei	H3K27ac	7	BI.Adipose_Nuclei.H3K27ac.7.filt.tagAlign.gz	BI.Adipose_Nuclei.Input.7.filt.tagAlign.gz	16568068	290	0.255599	35	0.243395	1500	0.217484	1.17526	1.47102
BI			Adipose_Nuclei	H3K27me3	7	BI.Adipose_Nuclei.H3K27me3.7.filt.tagAlign.gz	BI.Adipose_Nuclei.Input.7.filt.tagAlign.gz	47586569	210	0.409308	35	0.410733	1500	0.401727	1.01887	0.8417
BI			Adipose_Nuclei	H3K36me3	7	BI.Adipose_Nuclei.H3K36me3.7.filt.tagAlign.gz	BI.Adipose_Nuclei.Input.7.filt.tagAlign.gz	33259263	175	0.359342	35	0.361028	1500	0.342677	1.04863	0.908167
BI			Adipose_Nuclei	H3K4me1	7	BI.Adipose_Nuclei.H3K4me1.7.filt.tagAlign.gz	BI.Adipose_Nuclei.Input.7.filt.tagAlign.gz	30882175	150	0.306168	35	0.308696	1500	0.297355	1.02964	0.777146
BI			Adipose_Nuclei	H3K4me3	7	BI.Adipose_Nuclei.H3K4me3.7.filt.tagAlign.gz	BI.Adipose_Nuclei.Input.7.filt.tagAlign.gz	25125031	175	0.40545	35	0.376329	1500	0.271995	1.49065	1.27911
BI			Adipose_Nuclei	H3K9ac	7	BI.Adipose_Nuclei.H3K9ac.7.filt.tagAlign.gz	BI.Adipose_Nuclei.Input.7.filt.tagAlign.gz	29759040	190	0.298786	35	0.299428	1500	0.290258	1.02938	0.929981
BI			Adipose_Nuclei	H3K9me3	7	BI.Adipose_Nuclei.H3K9me3.7.filt.tagAlign.gz	BI.Adipose_Nuclei.Input.7.filt.tagAlign.gz	33387907	170	0.322404	35	0.332561	1500	0.316394	1.019	0.371765
BI			Adipose_Nuclei	Input	7	BI.Adipose_Nuclei.Input.7.filt.tagAlign.gz	BI.Adipose_Nuclei.Input.7.filt.tagAlign.gz	27656025	185	0.277333	35	0.282583	1500	0.274263	1.01119	0.368998
BI			Adipose_Nuclei	H3K27me3	92	BI.Adipose_Nuclei.H3K27me3.92.filt.tagAlign.gz	BI.Adipose_Nuclei.Input.92.filt.tagAlign.gz	34402199	175	0.334255	35	0.337101	1500	0.327185	1.02161	0.712979
BI			Adipose_Nuclei	H3K36me3	92	BI.Adipose_Nuclei.H3K36me3.92.filt.tagAlign.gz	BI.Adipose_Nuclei.Input.92.filt.tagAlign.gz	35329420	180	0.368211	35	0.370568	1500	0.350367	1.05093	0.883327
BI			Adipose_Nuclei	H3K4me1	92	BI.Adipose_Nuclei.H3K4me1.92.filt.tagAlign.gz	BI.Adipose_Nuclei.Input.92.filt.tagAlign.gz	35751102	175	0.388594	35	0.382148	1500	0.348255	1.11583	1.19019
BI			Adipose_Nuclei	H3K4me3	92	BI.Adipose_Nuclei.H3K4me3.92.filt.tagAlign.gz	BI.Adipose_Nuclei.Input.92.filt.tagAlign.gz	31023812	185	0.513046	35	0.478233	1500	0.304597	1.68434	1.20049
BI			Adipose_Nuclei	H3K9ac	92	BI.Adipose_Nuclei.H3K9ac.92.filt.tagAlign.gz	BI.Adipose_Nuclei.Input.92.filt.tagAlign.gz	32330203	180	0.335752	35	0.330321	1500	0.311299	1.07855	1.28546
BI			Adipose_Nuclei	H3K9me3	92	BI.Adipose_Nuclei.H3K9me3.92.filt.tagAlign.gz	BI.Adipose_Nuclei.Input.92.filt.tagAlign.gz	25715402	160	0.279906	35	0.297482	1500	0.268376	1.04296	0.396151
BI			Adipose_Nuclei	Input	92	BI.Adipose_Nuclei.Input.92.filt.tagAlign.gz	BI.Adipose_Nuclei.Input.92.filt.tagAlign.gz	35300070	155	0.328268	35	0.33317	1500	0.325096	1.00976	0.392851
BI			Adipose_Nuclei	H3K27me3	93	BI.Adipose_Nuclei.H3K27me3.93.filt.tagAlign.gz	BI.Adipose_Nuclei.Input.93.filt.tagAlign.gz	30670117	170	0.309732	35	0.311456	1500	0.302316	1.02453	0.811407
BI			Adipose_Nuclei	H3K36me3	93	BI.Adipose_Nuclei.H3K36me3.93.filt.tagAlign.gz	BI.Adipose_Nuclei.Input.93.filt.tagAlign.gz	19702792	170	0.235991	35	0.237091	1500	0.22002	1.07259	0.935538
BI			Adipose_Nuclei	H3K4me1	93	BI.Adipose_Nuclei.H3K4me1.93.filt.tagAlign.gz	BI.Adipose_Nuclei.Input.93.filt.tagAlign.gz	25735153	185	0.311701	35	0.304949	1500	0.27353	1.13955	1.21491
BI			Adipose_Nuclei	H3K4me3	93	BI.Adipose_Nuclei.H3K4me3.93.filt.tagAlign.gz	BI.Adipose_Nuclei.Input.93.filt.tagAlign.gz	27151571	175	0.343463	35	0.339284	1500	0.278197	1.2346	1.06841
BI			Adipose_Nuclei	H3K9ac	93	BI.Adipose_Nuclei.H3K9ac.93.filt.tagAlign.gz	BI.Adipose_Nuclei.Input.93.filt.tagAlign.gz	24234612	205	0.279806	35	0.271663	1500	0.255926	1.09331	1.51741
BI			Adipose_Nuclei	H3K9me3	93	BI.Adipose_Nuclei.H3K9me3.93.filt.tagAlign.gz	BI.Adipose_Nuclei.Input.93.filt.tagAlign.gz	25516544	170	0.278497	35	0.295103	1500	0.267331	1.04177	0.402054
BI			Adipose_Nuclei	Input	93	BI.Adipose_Nuclei.Input.93.filt.tagAlign.gz	BI.Adipose_Nuclei.Input.93.filt.tagAlign.gz	34174129	150	0.321959	35	0.327357	1500	0.317708	1.01338	0.440528
BI			Adipose_Nuclei	H3K27me3	94	BI.Adipose_Nuclei.H3K27me3.94.filt.tagAlign.gz	BI.Adipose_Nuclei.Input.94.filt.tagAlign.gz	34100322	165	0.339638	35	0.340225	1500	0.328554	1.03374	0.949759
BI			Adipose_Nuclei	H3K36me3	94	BI.Adipose_Nuclei.H3K36me3.94.filt.tagAlign.gz	BI.Adipose_Nuclei.Input.94.filt.tagAlign.gz	34167853	160	0.360128	35	0.363158	1500	0.343798	1.0475	0.843516
BI			Adipose_Nuclei	H3K4me1	94	BI.Adipose_Nuclei.H3K4me1.94.filt.tagAlign.gz	BI.Adipose_Nuclei.Input.94.filt.tagAlign.gz	30234248	180	0.367505	35	0.355154	1500	0.314534	1.16841	1.30404
BI			Adipose_Nuclei	H3K4me3	94	BI.Adipose_Nuclei.H3K4me3.94.filt.tagAlign.gz	BI.Adipose_Nuclei.Input.94.filt.tagAlign.gz	17768192	165	0.301491	35	0.276778	1500	0.205583	1.46652	1.34712
BI			Adipose_Nuclei	H3K9ac	94	BI.Adipose_Nuclei.H3K9ac.94.filt.tagAlign.gz	BI.Adipose_Nuclei.Input.94.filt.tagAlign.gz	28686319	190	0.328324	35	0.315028	1500	0.289519	1.13403	1.52124
BI			Adipose_Nuclei	H3K9me3	94	BI.Adipose_Nuclei.H3K9me3.94.filt.tagAlign.gz	BI.Adipose_Nuclei.Input.94.filt.tagAlign.gz	22609895	170	0.258653	35	0.277799	1500	0.247866	1.04352	0.360355
BI			Adipose_Nuclei	Input	94	BI.Adipose_Nuclei.Input.94.filt.tagAlign.gz	BI.Adipose_Nuclei.Input.94.filt.tagAlign.gz	33917793	160	0.320253	35	0.325011	1500	0.316055	1.01328	0.468655
BI			Adipose_Nuclei	H3K27me3	95	BI.Adipose_Nuclei.H3K27me3.95.filt.tagAlign.gz	BI.Adipose_Nuclei.Input.95.filt.tagAlign.gz	33316629	160	0.335511	35	0.336178	1500	0.326223	1.02847	0.932998
BI			Adipose_Nuclei	H3K36me3	95	BI.Adipose_Nuclei.H3K36me3.95.filt.tagAlign.gz	BI.Adipose_Nuclei.Input.95.filt.tagAlign.gz	29251116	175	0.3653	35	0.362374	1500	0.336015	1.08715	1.11099
BI			Adipose_Nuclei	H3K4me1	95	BI.Adipose_Nuclei.H3K4me1.95.filt.tagAlign.gz	BI.Adipose_Nuclei.Input.95.filt.tagAlign.gz	28162491	185	0.360567	35	0.347115	1500	0.306428	1.17668	1.33062
BI			Adipose_Nuclei	H3K4me3	95	BI.Adipose_Nuclei.H3K4me3.95.filt.tagAlign.gz	BI.Adipose_Nuclei.Input.95.filt.tagAlign.gz	24880405	190	0.488049	35	0.450727	1500	0.274444	1.77831	1.21171
BI			Adipose_Nuclei	H3K9ac	95	BI.Adipose_Nuclei.H3K9ac.95.filt.tagAlign.gz	BI.Adipose_Nuclei.Input.95.filt.tagAlign.gz	23404571	195	0.271309	35	0.261965	1500	0.246134	1.10228	1.59021
BI			Adipose_Nuclei	H3K9me3	95	BI.Adipose_Nuclei.H3K9me3.95.filt.tagAlign.gz	BI.Adipose_Nuclei.Input.95.filt.tagAlign.gz	22378951	165	0.267385	35	0.289859	1500	0.251254	1.0642	0.417837
BI			Adipose_Nuclei	Input	95	BI.Adipose_Nuclei.Input.95.filt.tagAlign.gz	BI.Adipose_Nuclei.Input.95.filt.tagAlign.gz	34927357	110	0.325546	35	0.330865	1500	0.322574	1.00921	0.358422
UCSD			Adipose_Tissue	H3K27ac	STL003	UCSD.Adipose_Tissue.H3K27ac.STL003.filt.tagAlign.gz	UCSD.Adipose_Tissue.Input.STL003.filt.tagAlign.gz	16429253	165	0.197096	35	0.201504	1500	0.188787	1.04401	0.653344
UCSD			Adipose_Tissue	Input	STL003	UCSD.Adipose_Tissue.Input.STL003.filt.tagAlign.gz	UCSD.Adipose_Tissue.Input.STL003.filt.tagAlign.gz	34323259	160	0.327637	35	0.331608	1500	0.320316	1.02286	0.648375
UCSD			Adrenal_Gland	H3K27ac	STL002	UCSD.Adrenal_Gland.H3K27ac.STL002.filt.tagAlign.gz	UCSD.Adrenal_Gland.Input.STL002.filt.tagAlign.gz	9791195	125	0.226247	45	0.201259	1500	0.142301	1.58991	1.42383
UCSD			Adrenal_Gland	H3K36me3	STL002	UCSD.Adrenal_Gland.H3K36me3.STL002.filt.tagAlign.gz	UCSD.Adrenal_Gland.Input.STL002.filt.tagAlign.gz	10737961	150	0.1416	40	0.142639	1500	0.135026	1.04869	0.863522
UCSD			Adrenal_Gland	H3K4me1	STL002	UCSD.Adrenal_Gland.H3K4me1.STL002.filt.tagAlign.gz	UCSD.Adrenal_Gland.Input.STL002.filt.tagAlign.gz	11493590	180	0.148714	40	0.148652	1500	0.141117	1.05383	1.0082
UCSD			Adrenal_Gland	Input	STL002	UCSD.Adrenal_Gland.Input.STL002.filt.tagAlign.gz	UCSD.Adrenal_Gland.Input.STL002.filt.tagAlign.gz	31676351	120	0.317948	35	0.314974	1500	0.302633	1.05061	1.2409
UCSD			Adrenal_Gland	H3K27ac	STL003	UCSD.Adrenal_Gland.H3K27ac.STL003.filt.tagAlign.gz	UCSD.Adrenal_Gland.Input.STL003.filt.tagAlign.gz	18408132	155	0.230546	35	0.225888	1500	0.206815	1.11475	1.24422
UCSD			Adrenal_Gland	H3K27me3	STL003	UCSD.Adrenal_Gland.H3K27me3.STL003.filt.tagAlign.gz	UCSD.Adrenal_Gland.Input.STL003.filt.tagAlign.gz	28476418	200	0.288355	35	0.290496	1500	0.282616	1.02031	0.728302
UCSD			Adrenal_Gland	H3K36me3	STL003	UCSD.Adrenal_Gland.H3K36me3.STL003.filt.tagAlign.gz	UCSD.Adrenal_Gland.Input.STL003.filt.tagAlign.gz	17038995	130	0.212727	35	0.216108	1500	0.197605	1.07653	0.817302
UCSD			Adrenal_Gland	H3K4me1	STL003	UCSD.Adrenal_Gland.H3K4me1.STL003.filt.tagAlign.gz	UCSD.Adrenal_Gland.Input.STL003.filt.tagAlign.gz	12940108	150	0.160586	35	0.167997	1500	0.154861	1.03697	0.435787
UCSD			Adrenal_Gland	H3K4me3	STL003	UCSD.Adrenal_Gland.H3K4me3.STL003.filt.tagAlign.gz	UCSD.Adrenal_Gland.Input.STL003.filt.tagAlign.gz	23951006	185	0.264605	35	0.267275	1500	0.248656	1.06414	0.856597
UCSD			Adrenal_Gland	H3K9me3	STL003	UCSD.Adrenal_Gland.H3K9me3.STL003.filt.tagAlign.gz	UCSD.Adrenal_Gland.Input.STL003.filt.tagAlign.gz	15412699	140	0.196349	35	0.200439	1500	0.180152	1.0899	0.798399
UCSD			Adrenal_Gland	Input	STL003	UCSD.Adrenal_Gland.Input.STL003.filt.tagAlign.gz	UCSD.Adrenal_Gland.Input.STL003.filt.tagAlign.gz	34792021	145	0.33462	35	0.337984	1500	0.324318	1.03176	0.753826
BI			Adult_Kidney	H3K27ac	27	BI.Adult_Kidney.H3K27ac.27.filt.tagAlign.gz	BI.Adult_Kidney.Input.27.filt.tagAlign.gz	20314048	175	0.261728	35	0.256719	1500	0.233184	1.12241	1.21285
BI			Adult_Kidney	H3K36me3	27	BI.Adult_Kidney.H3K36me3.27.filt.tagAlign.gz	BI.Adult_Kidney.Input.27.filt.tagAlign.gz	30895538	145	0.315254	35	0.317733	1500	0.306232	1.02946	0.784496
BI			Adult_Kidney	H3K4me1	27	BI.Adult_Kidney.H3K4me1.27.filt.tagAlign.gz	BI.Adult_Kidney.Input.27.filt.tagAlign.gz	38063868	170	0.365249	35	0.364893	1500	0.350015	1.04352	1.02396
BI			Adult_Kidney	H3K4me3	27	BI.Adult_Kidney.H3K4me3.27.filt.tagAlign.gz	BI.Adult_Kidney.Input.27.filt.tagAlign.gz	29653811	150	0.350329	35	0.344398	1500	0.294807	1.18833	1.11961
BI			Adult_Kidney	H3K9ac	27	BI.Adult_Kidney.H3K9ac.27.filt.tagAlign.gz	BI.Adult_Kidney.Input.27.filt.tagAlign.gz	38158119	160	0.353482	35	0.355919	1500	0.346219	1.02098	0.748766
BI			Adult_Kidney	H3K9me3	27	BI.Adult_Kidney.H3K9me3.27.filt.tagAlign.gz	BI.Adult_Kidney.Input.27.filt.tagAlign.gz	28166879	155	0.284862	35	0.29579	1500	0.280311	1.01624	0.294015
BI			Adult_Kidney	Input	27	BI.Adult_Kidney.Input.27.filt.tagAlign.gz	BI.Adult_Kidney.Input.27.filt.tagAlign.gz	24837625	85	0.256777	35	0.262861	1500	0.254564	1.00869	0.266639
BI			Adult_Kidney	H3K27ac	153	BI.Adult_Kidney.H3K27ac.153.filt.tagAlign.gz	BI.Adult_Kidney.Input.153.filt.tagAlign.gz	16237223	180	0.223354	35	0.218218	1500	0.196137	1.13877	1.2326
BI			Adult_Kidney	H3K36me3	153	BI.Adult_Kidney.H3K36me3.153.filt.tagAlign.gz	BI.Adult_Kidney.Input.153.filt.tagAlign.gz	30366234	220	0.30943	35	0.312344	1500	0.302606	1.02255	0.700742
BI			Adult_Kidney	H3K4me1	153	BI.Adult_Kidney.H3K4me1.153.filt.tagAlign.gz	BI.Adult_Kidney.Input.153.filt.tagAlign.gz	24666151	255	0.268267	35	0.269648	1500	0.260022	1.03171	0.85654
BI			Adult_Kidney	H3K4me3	153	BI.Adult_Kidney.H3K4me3.153.filt.tagAlign.gz	BI.Adult_Kidney.Input.153.filt.tagAlign.gz	32389651	225	0.406319	35	0.388461	1500	0.324359	1.25268	1.27859
BI			Adult_Kidney	H3K9ac	153	BI.Adult_Kidney.H3K9ac.153.filt.tagAlign.gz	BI.Adult_Kidney.Input.153.filt.tagAlign.gz	31747965	205	0.324139	35	0.323216	1500	0.310096	1.04529	1.07037
BI			Adult_Kidney	H3K9me3	153	BI.Adult_Kidney.H3K9me3.153.filt.tagAlign.gz	BI.Adult_Kidney.Input.153.filt.tagAlign.gz	32505936	205	0.317426	35	0.328767	1500	0.310622	1.0219	0.374969
BI			Adult_Kidney	Input	153	BI.Adult_Kidney.Input.153.filt.tagAlign.gz	BI.Adult_Kidney.Input.153.filt.tagAlign.gz	39877188	195	0.357981	35	0.361182	1500	0.353749	1.01197	0.569384
BI			Adult_Liver	H3K27ac	3	BI.Adult_Liver.H3K27ac.3.filt.tagAlign.gz	BI.Adult_Liver.Input.3.filt.tagAlign.gz	20842412	200	0.31275	35	0.294907	1500	0.247659	1.26283	1.37766
BI			Adult_Liver	H3K27me3	3	BI.Adult_Liver.H3K27me3.3.filt.tagAlign.gz	BI.Adult_Liver.Input.3.filt.tagAlign.gz	17842141	145	0.215014	35	0.210846	1500	0.202562	1.06147	1.5031
BI			Adult_Liver	H3K36me3	3	BI.Adult_Liver.H3K36me3.3.filt.tagAlign.gz	BI.Adult_Liver.Input.3.filt.tagAlign.gz	20744301	155	0.252394	35	0.251865	1500	0.238753	1.05713	1.04035
[truncated: 2,094 more rows]

## Sheet: BrowserInfo
Marks	Colors	Peaks (use automatic scale with -log10(Pval) and barplot with reduced height)	Active/Repressed	High/Low signal
[truncated: 38 more rows]
